# Supplementary material
Source: Research Square preprint supplement (doi:10.21203/rs.3.rs-9859684/v1)
Supplement: Supplementary file 1 [file d34d77572f571cb89b3e6480.xlsx]

## Sheet: PM-Tregs
ENSEMBLE_GENE_ID	GENE NAME	PM-Treg1	PM-Treg3	PM-Treg5	PM-Treg8	PM-Treg10	PM-Treg14	PM-Treg22	PM-Treg31	PM-Treg33
ENSG00000108821	COL1A1	4256.58	3753.15	351.045	1137.59	904.948	3383.95	1948.41	286.658	677.222
ENSG00000168542	COL3A1	1437.85	3676.55	145.111	795.057	922.075	2752.82	1771.28	259.643	579.799
ENSG00000198804	MT-CO1	116920	95299.2	105203	99383	90781.5	249285	260958	124652	91962.8
ENSG00000164692	COL1A2	1960.46	2481.67	142.717	426.072	425.403	2511.11	1088.44	213.868	507.409
ENSG00000211896	IGHG1	4955.7	4427.18	38.7921	462.739	8.83954	631.134	1227.06	1777.73	100.129
ENSG00000211592	IGKC	6453.32	3477.4	53.6385	466.452	18.2316	3800.23	1243.32	4131.03	225.29
ENSG00000156508	EEF1A1	78701.8	137840	181143	118786	98010.1	367360	146372	177645	244908
ENSG00000198886	MT-ND4	51221.4	57032.5	46201	44784	45425.3	172192	172560	54654.1	48303.3
ENSG00000125730	C3	22419.8	32951.1	43.1024	466.916	1149.14	5626.49	33408.7	82.5455	98.0991
ENSG00000198938	MT-CO3	27957.2	56618.9	29981.5	32045	22269	138769	118786	37747.3	29303.9
ENSG00000113140	SPARC	5923.76	7628.84	74.2319	604.299	705.506	3867.38	6896.01	149.332	381.572
ENSG00000198727	MT-CYB	21744.3	27758	27266.6	30473.5	23973.9	109858	106410	40051.1	28044.2
ENSG00000211897	IGHG3	1622.02	91.9138	7.18373	135.99	4.97224	469.994	672.573	372.956	40.5927
ENSG00000198712	MT-CO2	41523.3	61122.6	34708.9	39408.4	34593.5	144167	95074.1	51630	42334.1
ENSG00000019582	CD74	6746.58	31771.5	2597.16	13812.5	15069.8	43105.1	23967	23589.3	2591.17
ENSG00000210082	MT-RNR2	104549	65764.3	20513.9	35710.7	36177.5	1.27598e+06	444497	46954.1	44250.1
ENSG00000115414	FN1	909.691	2313.16	179.593	728.686	672.91	2994.53	1510.29	373.706	470.199
ENSG00000106366	SERPINE1	23546.3	704.672	179.114	692.019	771.25	1101.13	8372.08	117.815	44.652
ENSG00000075624	ACTB	39498.2	80332.6	32560	62334.2	62844.2	32886.1	23282.5	38021.2	25839.3
ENSG00000091986	CCDC80	5271.9	3140.39	97.6987	226.032	974.559	2269.4	17474.9	116.314	66.978
ENSG00000198888	MT-ND1	17411.3	20144.4	16219.9	18712.8	13516.2	66054.2	81944.3	27997.2	15843.3
ENSG00000205542	TMSB4X	22078.6	82339.4	15807.6	32608	47723	35504.7	40930.2	29991.8	34800.8
ENSG00000197746	PSAP	20845.1	17494.3	5050.16	8526.55	10756.1	10729.3	50106.7	5500.53	6789.13
ENSG00000198763	MT-ND2	32076.2	34100	23390.7	29768	24865.1	98215.2	113739	39213.6	25786.5
ENSG00000166710	B2M	68194.2	116424	44145.9	81562.2	97786.3	53901.5	56941.9	56661.5	60907.3
ENSG00000245532	NEAT1	15660	14859.4	21429.1	19608.6	15332.2	12931.5	29001.9	15021.8	21676.5
ENSG00000198786	MT-ND5	17779.6	10416.9	15026.4	16841.9	19324.3	49564.2	56521.8	44887.5	28739.6
ENSG00000087086	FTL	15876.2	20619.3	5530.99	10116.7	14469.2	38257.5	21542	9118.28	16344
ENSG00000184009	ACTG1	20912.5	42219.1	16384.2	25795	26715.3	21646.6	28106	14049.2	14924.6
ENSG00000112096	SOD2	48739.7	7307.14	2965.92	4275.11	12945.5	18074.6	92400.9	1896.3	2610.79
ENSG00000137801	THBS1	19319.6	1807.64	67.0481	883.242	898.871	1503.98	4825.24	71.2893	135.309
ENSG00000124942	AHNAK	31365.9	16728.3	15259.7	30311.5	21672.9	41252	82776.1	31684	50381
ENSG00000198899	MT-ATP6	21697.8	35019.1	19085.3	23302.6	19971.8	93166.1	75462.5	25984.6	20785.5
ENSG00000211677	IGLC2	1507.35	3906.33	3.35241	194.935	1.65741	349.138	255.851	490.02	20.2964
ENSG00000239951	IGKV3-20	578.199	199.146	11.015	67.7631	4.97224	617.706	223.335	731.653	50.7409
ENSG00000167658	EEF2	28555.5	25582.7	34189.8	25594.5	23985	62374.9	47358.2	42410.4	48885.8
ENSG00000142173	COL6A2	6063.45	2925.92	730.825	1038.73	971.244	1181.7	1130.37	457.752	409.31
ENSG00000134531	EMP1	3182.18	2665.5	138.885	401.473	480.098	2161.97	3610.16	107.309	104.865
ENSG00000011465	DCN	217.52	15211.7	11.015	93.7545	78.4509	362.566	309.76	18.0099	71.7138
ENSG00000163359	COL6A3	2339.9	551.483	169.536	306.327	93.3676	389.423	169.427	236.38	132.603
ENSG00000142156	COL6A1	4520.66	2190.61	211.202	557.886	820.42	980.272	1308.35	196.608	255.058
ENSG00000243466	IGKV1-5	535.112	91.9138	3.35241	16.2446	1.65741	80.5703	58.187	360.949	16.2371
ENSG00000150991	UBC	30578.5	76089.3	9887.68	14112.8	19466.9	170755	30767.2	10609.3	21135.3
ENSG00000143384	MCL1	21474.7	42908.4	12225.3	19007.1	18782.9	30657	31805.2	10188.4	10255.1
ENSG00000164733	CTSB	12823.2	7873.95	2024.37	6031.38	7139.03	4565.65	16749.3	2772.03	1667.01
ENSG00000100316	RPL3	19358.6	46263.3	46200.5	30848	23322.6	95140.1	36778.4	31821.3	54006.6
ENSG00000182326	C1S	10354.1	9313.93	40.7078	191.222	341.98	3007.96	14292.6	156.086	77.1262
ENSG00000211662	IGLV3-21	793.634	122.552	0.478915	6.49784	0	80.5703	66.7439	146.331	6.08891
ENSG00000196924	FLNA	22862.5	15717.3	14944.1	36750.4	22217.6	37344.3	54769.3	23225.3	25319
ENSG00000100345	MYH9	17753.9	14323.2	22092.8	34766.7	26207.6	18678.9	40062.6	35872.8	20305.2
ENSG00000087245	MMP2	307.168	45.9569	11.494	143.417	112.704	120.855	229.325	28.5157	50.7409
ENSG00000120129	DUSP1	9837.73	23821	248.078	1517.71	1737.52	13576.1	14075.3	430.737	555.444
ENSG00000231500	RPS18	16333.4	28140.9	18733.2	16961.7	15293	76179.2	21901.4	20566.6	26266.2
ENSG00000130635	COL5A1	3182.18	1087.65	64.1746	282.656	663.518	469.994	2450.7	153.835	132.603
ENSG00000175899	A2M	1444.11	1057.01	35.4397	157.34	64.6391	698.276	2078.47	94.5521	60.2125
ENSG00000137154	RPS6	17616.3	38848.9	28810.6	22164.1	19960.2	93703.3	21788.4	19696.9	34909.1
ENSG00000108654	DDX5	17258.4	32843.8	25588.4	26033.1	29806.9	62254	35542.8	15963.6	31392.4
ENSG00000128016	ZFP36	5168.35	26011.6	4025.76	4645.95	3850.72	8876.16	13667.9	3668.02	2564.78
ENSG00000211893	IGHG2	1560.17	91.9138	11.494	80.2947	3.8673	120.855	100.971	423.984	20.9729
ENSG00000141753	IGFBP4	3314.22	3416.13	163.31	379.659	836.441	1342.84	7945.09	340.688	142.751
ENSG00000123384	LRP1	8356.09	1960.83	181.988	584.341	768.488	926.559	7054.31	310.671	217.171
ENSG00000139329	LUM	125.786	3722.51	1.91566	48.7338	24.8612	590.849	168.571	24.0132	91.3336
ENSG00000187498	COL4A1	6093.33	674.034	6.70481	84.936	141.985	644.563	132.632	49.5273	127.191
ENSG00000169908	TM4SF1	10294.3	10616	17.2409	115.105	313.804	5787.63	15122.6	21.762	60.8891
ENSG00000140988	RPS2	11335.3	22197.2	16062.3	11767.6	11934.5	31207.6	20969.6	15602.6	23121.6
ENSG00000211598	IGKV4-1	471.177	137.871	9.09939	100.716	0.552471	187.997	17.9695	604.833	25.7087
ENSG00000089157	RPLP0	14456.4	20634.6	16210.3	17890.4	14925	46556.2	19556.8	18909.7	23951.1
ENSG00000170345	FOS	6952.99	22273.8	110.629	865.605	557.444	12488.4	7643.03	117.815	151.546
ENSG00000160789	LMNA	5932.1	12439	293.096	1441.59	1545.81	6485.91	10780.8	618.341	608.214
ENSG00000186340	THBS2	2676.95	76.5948	44.5391	103.501	561.311	322.281	8916.3	29.2661	72.3904
ENSG00000105835	NAMPT	12368	11826.2	1662.79	2620.02	9204.17	6955.9	17519.4	766.172	999.934
ENSG00000212907	MT-ND4L	5088.43	2129.34	4398.84	4923.04	4204.86	20344	18802.1	6613.4	5495.58
ENSG00000070756	PABPC1	23234.3	26302.7	53381.8	25743	17682.9	64040	42366.9	14777.1	25614
ENSG00000174444	RPL4	16132.6	32997	24841.8	19585.4	20143.1	53069	19995.8	21472.3	31328.1
ENSG00000111640	GAPDH	33909.4	17203.2	4716.36	17347.4	12513.5	14274.4	17264.4	10762.4	8525.82
ENSG00000101825	MXRA5	1081.34	45.9569	11.9729	70.0838	239.773	93.9987	2149.49	10.5058	25.0322
ENSG00000124491	F13A1	77.1396	1363.39	2.87349	32.4892	7.7346	228.283	1411.89	10.5058	28.4149
ENSG00000134333	LDHA	41637.3	15778.5	3980.74	11378.6	10504.7	8849.31	15466.6	5306.93	2387.53
ENSG00000125148	MT2A	15901.2	7521.61	102.488	829.402	845.834	5693.64	28219.8	141.828	202.287
ENSG00000211673	IGLV3-1	202.231	536.164	1.91566	8.81849	0.552471	40.2852	118.085	134.324	7.442
ENSG00000026025	VIM	4392.79	15977.7	2427.14	6542.86	4661.2	12273.5	9294.51	1903.8	3522.77
ENSG00000163430	FSTL1	7397.75	4871.43	22.509	141.56	601.089	939.987	2527.71	85.5472	43.2989
ENSG00000182718	ANXA2	18603.8	14078.1	876.894	4446.38	5018.1	5921.92	13865.6	1784.48	2460.6
ENSG00000130066	SAT1	16430	21783.6	1749.48	3220.14	4748.49	22600	23975.6	3936.67	2668.29
ENSG00000167978	SRRM2	20682.4	11703.7	36659	26204.8	20100.6	22680.5	42568.9	41191.7	27630.1
ENSG00000198840	MT-ND3	6207.3	19363.2	4510.9	6526.15	6274.97	48570.5	28484.2	10213.9	6760.04
ENSG00000077942	FBLN1	244.623	520.845	1.43675	79.3664	20.9939	187.997	124.931	7.50414	15.5605
ENSG00000137818	RPLP1	11208.9	32169.8	14307.6	17731.2	15623.3	45186.5	17853.1	19869.5	30679.3
ENSG00000133112	TPT1	14844.8	40488	18532.6	19963.7	16365.9	68390.8	19322.3	17073.4	28012.4
ENSG00000142871	CCN1	7184.4	2190.61	12.4518	142.488	739.759	872.845	1596.72	63.7852	28.4149
ENSG00000135486	HNRNPA1	10823.2	20404.9	15903.3	14204.7	17821.1	36592.4	14019.6	12370.6	15202
ENSG00000166598	HSP90B1	19573.3	12653.5	6030.02	5063.67	8849.48	19108.6	16924.7	5283.66	7234.98
ENSG00000204262	COL5A2	512.179	321.698	65.1325	90.5056	163.531	375.995	172.849	46.5257	105.541
ENSG00000148303	RPL7A	9547.24	20113.8	10984.4	11342	10864.9	32590.7	14130	12733.8	18301.2
ENSG00000102265	TIMP1	12926.8	4595.69	156.605	1155.22	1459.63	2631.96	6681.23	288.159	150.87
ENSG00000142534	RPS11	9478.44	36949.3	11445.6	12865.3	13528.4	62173.4	16029.7	18809.1	23260.3
ENSG00000187514	PTMA	12669	34789.4	13397.7	15473.2	16690.7	33477	19384.8	15862.2	16898.1
ENSG00000251562	MALAT1	12102.6	7153.95	29269.4	11470.5	18697.8	18061.2	22923.1	11133.1	9383.68
ENSG00000251562	MALAT1	12102.6	7153.95	29269.4	11470.5	18697.8	18061.2	22923.1	11133.1	9383.68
ENSG00000110321	EIF4G2	19444.7	15947	10625.2	13489.5	15711.7	45226.8	24228.9	17094.4	19329.6
ENSG00000159403	C1R	10396.5	2803.37	22.0301	114.176	416.011	1732.26	6953.34	57.0314	41.9458
ENSG00000115380	EFEMP1	14584.9	9574.35	6.2259	99.7882	943.068	2188.83	3688.88	41.2728	26.3853
ENSG00000211679	IGLC3	510.789	275.741	10.5361	65.9066	1.10494	13.4284	106.961	556.057	22.326
ENSG00000167526	RPL13	13258.3	33487.2	20042.1	14595.5	12532.3	38297.8	18396.5	19425.2	38763.3
ENSG00000134871	COL4A2	4763.19	153.19	8.62047	101.181	223.198	389.423	113.807	48.0265	97.4225
ENSG00000204287	HLA-DRA	1398.94	3691.87	249.515	1438.34	1039.2	14059.5	4361.45	4627.8	349.774
ENSG00000118515	SGK1	4345.53	2405.08	1429.56	1365.01	2325.9	10501	9390.35	301.666	422.841
ENSG00000147604	RPL7	11399.3	26287.3	16002	11890.1	13759.3	52934.7	17676.9	11657.7	19656.3
ENSG00000152583	SPARCL1	1228.67	199.146	3.83132	12.9957	11.6019	362.566	77.0121	5.2529	37.21
ENSG00000211892	IGHG4	2078.6	0	0	14.3881	1.10494	80.5703	175.417	151.584	6.08891
ENSG00000182492	BGN	1022.97	1439.98	14.3675	164.302	96.6825	268.568	284.945	33.7686	59.536
ENSG00000125740	FOSB	1324.58	20772.5	363.976	1086.07	697.219	13683.5	7024.36	38.2711	182.667
ENSG00000122566	HNRNPA2B1	15566.2	23836.3	17121.7	17463.9	21332.6	46462.2	22382.3	23676.3	17873.7
ENSG00000211966	IGHV5-51	189.722	0	5.74698	28.7761	0.552471	67.1419	9.4126	144.83	2.02964
ENSG00000149273	RPS3	11411.1	31143.4	19427.2	16632.1	15715	52464.7	17229.3	17703	30000.1
ENSG00000167460	TPM4	12508.4	7996.5	1663.27	3141.24	6516.4	3813.66	5221.42	3382.11	1618.3
ENSG00000178209	PLEC	23674.2	5331	15785	20964.3	9893.1	10407	41169.8	10845.7	24166.9
ENSG00000067082	KLF6	13742	31848.1	10137.7	20592.1	15191.9	20572.3	36558.5	5453.26	9797.73
ENSG00000142541	RPL13A	11363.1	40227.6	17406.7	15749.8	14298.5	60575.4	20278.2	24017	33759.6
ENSG00000067225	PKM	43013.3	16667	5354.27	20388.4	14251	10286.1	15433.2	28774.6	8071.86
ENSG00000135821	GLUL	5244.8	3033.15	265.798	1152.9	1629.79	2793.1	3858.31	636.351	320.683
ENSG00000122862	SRGN	9125.4	32997	2178.59	8192.84	10480.9	8728.45	19905.9	1608.14	4304.86
ENSG00000000971	CFH	1571.98	168.509	9.09939	23.2066	17.1266	2430.54	316.605	15.0083	27.7384
ENSG00000100979	PLTP	477.431	2466.35	9.5783	44.5566	55.2471	537.135	2287.26	13.5074	12.8544
ENSG00000074800	ENO1	55307.7	19914.6	9456.66	30818.3	23078.4	10487.6	15870.5	12340.6	7153.79
ENSG00000161016	RPL8	13841.3	22626.1	16625.5	14118.9	13132.8	35652.4	17860	14163.3	20518.9
ENSG00000059804	SLC2A3	10555.6	38802.9	4103.82	5843.87	3619.24	10004.1	5921.38	1373.26	2160.21
ENSG00000147065	MSN	18371	13909.6	7739.75	16910.2	14720.6	13173.2	22011.8	11549.6	9708.43
ENSG00000142798	HSPG2	5150.28	444.25	98.1776	131.349	42.5403	26.8568	1019.13	19.5108	51.4174
ENSG00000167996	FTH1	5580.46	1577.85	741.84	1194.67	1099.42	1544.26	9888.36	880.986	1156.22
ENSG00000177954	RPS27	9068.42	45619.9	15150.5	14185.7	14145.5	74541	17991.7	16361.3	31266.5
ENSG00000198034	RPS4X	10404.1	38205.5	17638.4	14074.3	13806.8	60320.3	13984.6	13558.5	22998.5
ENSG00000131016	AKAP12	1499.01	61.2758	13.4096	51.9827	98.8924	67.1419	771.833	19.5108	27.0618
ENSG00000138326	RPS24	6379.65	16238.1	5059.74	5325.44	7888.18	21552.6	10883.5	3847.37	8215.97
ENSG00000211949	IGHV3-23	300.914	337.017	6.2259	56.1599	2.20989	80.5703	62.4654	144.079	18.2667
ENSG00000142192	APP	8561.8	6587.15	1098.63	950.076	1174.55	4041.94	7732.02	652.86	1039.85
ENSG00000034510	TMSB10	7807.08	26517.1	2950.6	6737.33	8106.41	13415	5994.11	5610.84	5256.76
ENSG00000096384	HSP90AB1	16164.6	44164.6	9336.45	12800.3	15296.3	142838	44603.7	13337.9	12394.3
ENSG00000100201	DDX17	19877.7	13082.4	37630.8	29330.8	24318.7	12381	14509.1	21946.6	32815.2
ENSG00000112936	C7	286.32	260.422	3.35241	17.637	2.76236	53.7135	79.5792	4.50248	20.9729
ENSG00000122406	RPL5	10078.9	17616.8	14950.8	11160	11406.3	39170.6	11687.9	12450.1	19498
ENSG00000150093	ITGB1	14086	5361.64	3678.55	2832.59	8192.6	2873.67	7679.82	5044.28	5036.88
ENSG00000185650	ZFP36L1	12187.4	15518.1	3996.55	6291.3	6445.68	9279.01	8987.32	12007.4	3739.94
ENSG00000196126	HLA-DRB1	1758.92	1914.87	106.798	280.799	692.246	9225.3	4750.79	360.949	115.013
ENSG00000135046	ANXA1	10192.2	8593.94	210.244	1336.7	1619.85	9440.16	17584.4	1105.36	831.474
ENSG00000038427	VCAN	2940.34	137.871	18.1988	181.475	545.842	201.426	376.504	24.7637	61.5656
ENSG00000177575	CD163	821.432	628.077	7.18373	141.096	378.443	416.28	2146.07	24.0132	30.4445
ENSG00000204628	RACK1	9636.19	20098.5	14501.1	12840.7	11926.7	28750.2	14190.8	15199.6	18707.8
ENSG00000118523	CCN2	476.041	1746.36	1.43675	32.9533	89.5003	966.844	723.914	24.7637	17.5902
ENSG00000084234	APLP2	9244.93	3538.68	2203.01	3647.14	6337.4	4579.08	13015.9	1897.8	3467.29
ENSG00000106624	AEBP1	439.904	306.379	250.952	177.298	281.208	617.706	124.931	938.768	140.045
ENSG00000166441	RPL27A	6966.19	24954.6	9641.04	8653.72	8119.67	31570.1	11577.5	10664.9	16762.1
ENSG00000197956	S100A6	11084.5	8823.72	1078.04	4053.26	5122.51	3397.38	10697	2206.22	3608.69
ENSG00000136156	ITM2B	8675.07	9099.46	6036.73	6959.65	6228.01	4109.09	7436.81	6414.54	8964.23
ENSG00000104419	NDRG1	16676	5606.74	3533.44	5690.71	5119.2	7895.89	7500.13	1368	3444.97
ENSG00000100234	TIMP3	850.62	4013.57	6.2259	87.7208	39.7779	375.995	1791.82	27.0149	35.8569
ENSG00000211895	IGHA1	2717.95	352.336	45.4969	118.818	17.1266	389.423	113.807	619.091	72.3904
ENSG00000108298	RPL19	9655.65	23376.7	15309.5	13601.4	11528.4	37330.9	12766	14491.2	23338.1
ENSG00000134107	BHLHE40	8699.4	10508.8	2313.16	3316.22	5299.3	4887.93	8234.31	1945.07	392.396
ENSG00000127022	CANX	14958.1	5422.91	4488.87	5375.57	7728.52	4565.65	14360.2	4828.16	6124.09
ENSG00000211459	MT-RNR1	11073.3	15119.8	3935.73	7532.38	4542.42	131262	58142.5	7273.01	6777.63
ENSG00000035862	TIMP2	2221.76	3845.06	260.53	368.52	343.085	751.99	6442.49	136.575	233.408
ENSG00000122026	RPL21	8755.69	26624.4	15340.1	12671.2	11724	57889.8	13015.1	12106.4	23101.3
ENSG00000157227	MMP14	8970.43	1639.13	40.2289	403.794	1660.73	402.852	3587.05	108.81	64.9484
ENSG00000152518	ZFP36L2	6711.84	21599.7	4591.36	7771.41	4912.02	8204.74	10648.2	6161.65	6268.87
ENSG00000080824	HSP90AA1	24572.1	77513.9	8517.99	7641.45	17544.3	302018	63016.5	11657.7	13074.9
ENSG00000115677	HDLBP	7116.99	3155.71	2416.61	3261.45	3335.82	4525.37	11980.5	3752.07	2654.76
ENSG00000147403	RPL10	10066.4	33226.8	15529.8	15210	12785.8	41587.7	12271.5	9476.22	20993.2
ENSG00000169045	HNRNPH1	14294.4	20404.9	26909.3	13548.5	18935.4	56869.2	28049.5	26703.5	23757.6
ENSG00000122786	CALD1	2358.66	2114.02	20.5934	20.4218	260.766	496.85	1002.01	59.2827	47.3582
ENSG00000110799	VWF	2362.14	413.612	3.35241	6.49784	1.10494	0	43.6402	15.7587	17.5902
ENSG00000116016	EPAS1	3203.03	1409.34	193.961	365.735	700.534	523.707	3304.68	95.3025	88.6274
ENSG00000163682	RPL9	7540.22	24081.4	11175	12162.6	11755.5	55472.7	13266.6	8259.8	18908.8
ENSG00000092820	EZR	6609.68	27466.9	5314.04	15228.1	8313.59	17940.3	28050.4	9660.08	13444.3
ENSG00000112306	RPS12	6652.07	27068.6	13966.1	11389.3	9708.58	43212.5	11614.3	12086.2	26016.6
ENSG00000137076	TLN1	15001.9	4273.99	9109.93	15363.7	10792.5	5089.36	11067.5	12793.8	9566.35
ENSG00000075426	FOSL2	9884.29	18045.7	1756.66	4077.39	5258.97	2967.67	17060.8	319.676	763.82
ENSG00000177606	JUN	12986.6	27972.4	1549.77	5120.76	4491.04	34443.8	14106.9	775.928	1066.91
ENSG00000164924	YWHAZ	16291	24495	13351.7	19219.2	20851.4	19108.6	22918	10291.9	15472.6
ENSG00000133110	POSTN	76.4446	153.19	0	41.7718	16.0217	590.849	172.849	42.0232	140.721
ENSG00000044574	HSPA5	14565.5	19210	3052.13	5254.89	7555.6	37330.9	16490.9	3451.15	4348.83
ENSG00000134954	ETS1	16793.5	11550.5	37297.4	28223.3	31279.8	6727.62	14029.9	25047.3	29711.8
ENSG00000149131	SERPING1	7704.92	5177.81	3.35241	102.573	67.954	966.844	843.711	18.0099	24.3556
ENSG00000142676	RPL11	9400.6	25904.4	13244.4	11690.5	10319.1	45293.9	10979.4	11348.5	18792.4
ENSG00000157514	TSC22D3	2577.57	26624.4	2109.14	6339.57	3418.14	7667.61	8816.18	1519.59	7037.42
ENSG00000087460	GNAS	10171.3	14537.7	8442.8	11147.5	8861.09	28414.5	15813.2	10556.1	8382.4
ENSG00000173812	EIF1	9338.06	34498.3	8654.48	10938.2	12506.3	50020.7	19148.6	6472.32	11608.2
ENSG00000174748	RPL15	8201.81	18428.7	10247.3	10406.7	11383.1	22344.8	9000.15	8595.24	12952.5
ENSG00000166147	FBN1	544.842	781.267	18.1988	31.0968	55.2471	93.9987	433.835	52.529	29.0915
ENSG00000109971	HSPA8	21084.1	77452.7	8809.65	15796.7	13313.5	103748	47359.9	20139.6	17030.7
ENSG00000211938	IGHV3-7	66.7153	15.319	1.43675	20.4218	0	80.5703	13.691	134.324	7.442
ENSG00000100644	HIF1A	4385.14	3891.02	4067.91	2608.88	6900.37	7600.47	8024.67	3094.71	1922.74
ENSG00000197694	SPTAN1	7233.05	7965.86	9202.36	11369.4	7513.61	10715.9	17510.9	16045.3	14533.5
ENSG00000118785	SPP1	7294.21	735.31	4.31024	624.256	116.571	4834.22	6854.08	90.0496	90.6571
ENSG00000090104	RGS1	9155.29	31082.2	9417.87	5859.19	23291.1	8513.6	9457.09	969.535	1258.37
ENSG00000132475	H3F3B	10043.4	36505.1	6658.84	11003.6	12200.8	41936.8	15830.3	5187.61	7092.9
ENSG00000140575	IQGAP1	10087.2	4365.9	6500.32	7429.81	10683.7	6754.48	14521.1	8144.99	7700.44
ENSG00000231389	HLA-DPA1	962.507	3554	233.711	1768.34	1862.38	3155.67	2761.31	2430.59	395.102
ENSG00000143947	RPS27A	7119.77	23851.6	9058.68	8614.74	10536.2	41037.1	9941.41	9498.74	17508.3
ENSG00000125691	RPL23	4864.66	17417.7	5362.41	5565.4	7338.48	24761.9	8218.05	7363.81	8349.92
ENSG00000162511	LAPTM5	7457.52	18689.1	8143.47	12327.3	13034.5	18504.3	11373	13487.2	7078.69
ENSG00000118181	RPS25	5528.34	21906.1	8019.91	7786.73	8524.08	35652.4	8055.47	6063.34	13627
ENSG00000154734	ADAMTS1	558.741	1057.01	4.78915	35.274	38.1205	120.855	678.563	21.0116	16.9136
ENSG00000113657	DPYSL3	276.591	61.2758	11.9729	54.7675	187.288	53.7135	480.042	37.5207	18.9433
ENSG00000185215	TNFAIP2	18241.1	1884.23	38.3132	324.892	508.826	1007.13	29588.1	59.2827	40.5927
ENSG00000187955	COL14A1	80.6143	459.569	0.478915	20.4218	4.97224	93.9987	48.7744	1.50083	14.884
ENSG00000115594	IL1R1	3699.22	1302.11	1711.64	2521.16	4279.44	631.134	2790.41	677.624	464.787
ENSG00000008988	RPS20	6825.11	26026.9	10191.8	8967.94	8182.1	46045.9	10288	9384.67	15989.5
ENSG00000197958	RPL12	6109.31	15962.4	9040.96	6022.1	6678.83	23164	9463.08	5760.93	12277.9
ENSG00000169504	CLIC4	14491.1	1271.47	93.3885	487.802	1002.74	5613.07	13454	1262.95	173.196
ENSG00000137573	SULF1	397.512	4243.35	9.5783	26.4555	131.488	1638.26	5062.27	22.5124	39.9162
ENSG00000280411	IGHV1-69D	198.061	0	0.95783	0	0	120.855	113.807	67.5372	1.35309
ENSG00000135404	CD63	7009.28	5147.17	350.566	1438.81	2254.64	3665.95	5073.39	1523.34	715.108
ENSG00000109046	WSB1	9670.24	4871.43	5658.38	5394.6	3391.62	5492.21	7960.49	5661.12	10286.2
ENSG00000170421	KRT8	35510.6	8165.01	63.6957	404.258	1478.41	2699.11	11953.1	60.7835	25.7087
ENSG00000171223	JUNB	5289.97	29963.9	2240.37	2581.96	4479.44	6002.49	5039.16	1588.63	1627.77
ENSG00000124212	PTGIS	306.473	291.06	13.8885	65.9066	173.476	308.853	2114.41	5.2529	10.1482
ENSG00000139644	TMBIM6	10852.4	12239.8	8493.08	12804.9	11749.4	13428.4	12211.6	8803.85	9970.25
ENSG00000010327	STAB1	2633.86	765.948	40.7078	314.681	382.31	416.28	3947.3	47.2761	34.5038
ENSG00000089009	RPL6	8565.97	17861.9	10404.9	9513.3	11871	28521.9	10519.9	10492.3	12604
ENSG00000168906	MAT2A	2315.58	2542.95	2550.7	2537.87	2491.65	7305.04	5034.03	4040.23	3476.77
ENSG00000196531	NACA	6583.27	13955.6	8551.03	6787.92	7214.17	22680.5	8436.25	8659.77	13288.7
ENSG00000158859	ADAMTS4	1234.93	137.871	71.3584	51.0544	22.0989	67.1419	86.4247	44.2744	83.8916
ENSG00000185624	P4HB	11930.9	4090.16	1790.19	2973.22	3128.09	3115.39	10127.1	2656.46	2341.52
ENSG00000125810	CD93	3743.7	337.017	28.7349	204.682	246.402	40.2852	1188.55	16.5091	43.9754
ENSG00000103196	CRISPLD2	218.215	61.2758	3.35241	14.8522	33.7007	147.712	483.465	1.50083	10.8247
ENSG00000158710	TAGLN2	8517.32	15364.9	2311.72	6982.39	6907.55	11172.4	12766.9	4968.49	5297.35
ENSG00000009307	CSDE1	11550.8	7322.46	9230.61	7167.11	10068.8	11790.1	11216.4	8908.91	12468.1
ENSG00000168028	RPSA	9730.01	24709.5	14487.2	12791	13291.9	35222.7	13702.2	12285	18159.8
ENSG00000144713	RPL32	7994.72	22442.3	13178.3	10759.5	9042.85	39197.5	10400.9	8333.34	17957.5
ENSG00000177469	CAVIN1	9960.04	4013.57	29.6927	291.01	913.787	1020.56	4219.41	59.2827	33.1507
ENSG00000143878	RHOB	1756.14	4044.21	93.8674	602.906	585.62	3491.38	5134.14	103.557	622.422
ENSG00000142089	IFITM3	8627.12	4595.69	79.4999	366.664	202.757	711.704	1947.55	93.0513	75.0965
ENSG00000112715	VEGFA	9211.58	965.094	29.6927	427.929	627.607	1275.7	4815.83	61.5339	31.7976
ENSG00000145592	RPL37	6579.1	18015.1	7469.16	6507.12	6648.99	29206.7	7824.43	6632.16	12486.3
ENSG00000149925	ALDOA	25620.8	9589.67	4229.78	9167.52	7723.55	5210.21	8137.62	5566.57	5548.35
ENSG00000129538	RNASE1	1831.2	3523.36	4.78915	58.9447	30.3859	322.281	680.274	27.7653	25.7087
ENSG00000152952	PLOD2	18432.9	2098.7	21.5512	230.673	271.263	1275.7	9867.82	25.5141	20.2964
ENSG00000138821	SLC39A8	12452.8	3140.39	806.493	457.633	1097.21	966.844	22246.2	402.222	462.08
ENSG00000107562	CXCL12	311.338	183.828	8.14156	29.2403	15.4692	80.5703	110.384	6.00331	15.5605
ENSG00000071082	RPL31	5856.35	18627.9	7945.68	6900.7	7090.42	37854.6	7874.92	7946.88	14547.1
ENSG00000108107	RPL28	7409.57	26946.1	12148.6	12139.8	9368.81	29999	11390.1	9065	12506.6
ENSG00000184557	SOCS3	6225.37	8226.28	5964.41	5800.71	8148.95	3880.8	5787.03	606.334	289.561
ENSG00000124145	SDC4	5761.84	5652.7	112.066	959.823	1251.35	1638.26	39361.8	156.086	352.48
ENSG00000142937	RPS8	7572.19	19363.2	8884.83	8708.03	8444.52	33732.1	8973.63	7933.37	12792.1
ENSG00000164587	RPS14	6697.94	19638.9	11358	9707.3	7794.26	34980.9	10700.4	10048.8	16687.7
ENSG00000197756	RPL37A	5826.47	16621.1	5718.25	5535.23	6841.8	24976.8	6780.49	5461.51	9301.82
ENSG00000177600	RPLP2	7063.48	23453.3	11564.8	10668.1	6914.73	32268.4	10526.7	11575.9	18610.4
ENSG00000211663	IGLV3-19	195.976	428.931	0	13.4598	0	174.569	30.8049	126.82	15.5605
ENSG00000116285	ERRFI1	3219.71	1286.79	90.515	162.91	142.538	953.415	4583.93	154.585	140.721
ENSG00000261371	PECAM1	3042.5	674.034	65.6114	198.648	146.405	281.996	379.927	832.209	71.0373
ENSG00000214548	MEG3	1068.14	428.931	3.83132	74.7251	264.081	187.997	7314.44	3.75207	17.5902
ENSG00000085063	CD59	4583.9	2343.8	582.361	1589.18	1833.1	2551.39	4423.92	1439.29	1905.83
ENSG00000197747	S100A10	7852.95	13756.4	652.283	2255.68	2170.66	4350.8	5926.51	1047.58	2101.35
ENSG00000173372	C1QA	373.189	2175.29	2.87349	49.662	86.738	1383.12	1804.65	12.0066	27.7384
ENSG00000115524	SF3B1	11823.9	7705.44	20423.3	10153.3	14380.8	18719.2	18356.3	16180.4	21472.9
ENSG00000179218	CALR	14739.2	11902.8	4148.84	7529.13	8348.95	13925.2	10002.2	4975.99	5605.18
ENSG00000165119	HNRNPK	12038.6	13710.5	9083.11	12152.8	13399.1	12743.5	11060.7	11350.8	10397.1
ENSG00000105193	RPS16	7772.33	20420.2	7889.65	10480.5	11462.7	25527.4	12286.9	10728.7	14992.2
ENSG00000149257	SERPINH1	4616.56	5882.48	261.009	397.76	448.607	5371.35	4927.07	149.332	271.971
ENSG00000153187	HNRNPU	10728	16299.4	10356.5	10618.9	9318.53	18732.6	12796	11427.3	10585.2
ENSG00000163453	IGFBP7	1008.37	811.905	4.31024	65.4425	59.6669	228.283	48.7744	17.2595	58.1829
ENSG00000100097	LGALS1	2036.9	3737.83	113.503	1314.88	1348.58	4753.65	4683.19	1541.35	750.289
ENSG00000215301	DDX3X	6916.85	18275.5	9757.9	6990.28	9174.34	38472.3	11884.7	17222	10374.1
ENSG00000181163	NPM1	7349.11	12347.1	8032.37	6611.55	8816.34	28320.5	9054.06	6780.74	12646.7
ENSG00000111799	COL12A1	2715.87	337.017	6.2259	25.0631	180.106	174.569	1868.83	39.0215	40.5927
ENSG00000188846	RPL14	7063.48	13879	10208.1	7770.02	7764.43	21874.8	9078.88	8099.22	14702
ENSG00000204592	HLA-E	14723.9	12622.8	7533.34	8949.38	6592.09	7090.19	8938.54	8124.73	8910.1
ENSG00000173369	C1QB	313.423	1930.19	2.39458	59.8729	55.7996	1141.41	1573.61	20.2612	20.9729
ENSG00000170525	PFKFB3	6833.45	9022.87	7166.49	9766.25	10998	5210.21	8062.32	2469.61	2144.65
ENSG00000026508	CD44	13106.8	15211.7	10954.7	14800.2	12605.7	21216.8	31092.4	9850.68	14388.8
ENSG00000170889	RPS9	7401.23	14154.7	10267.5	8354.82	6612.53	35222.7	10042.4	10030.8	14027.5
ENSG00000115053	NCL	10437.5	10585.4	7827.87	8262	10329.6	19189.2	10663.6	10702.4	9518.32
ENSG00000198695	MT-ND6	3932.73	5300.36	3377.79	4082.5	7042.9	15268.1	10988.8	11112.9	7103.73
ENSG00000164111	ANXA5	13770.5	4748.88	867.794	2886.43	3764.54	6405.34	10790.3	2272.25	1418.04
ENSG00000067560	RHOA	6675.7	11642.4	4529.1	10266.6	9931.78	9185.02	8207.78	6015.32	6699.15
ENSG00000196262	PPIA	6410.23	12883.2	5021.9	7327.7	7983.21	8768.74	6578.55	6733.46	5839.26
ENSG00000013588	GPRC5A	11564.7	1731.04	30.6506	204.682	269.606	819.132	25894.1	15.0083	20.2964
ENSG00000145425	RPS3A	4877.17	16912.1	7888.21	7440.49	6968.32	37505.5	6919.97	6368.76	13274.5
ENSG00000171863	RPS7	6179.5	13633.9	7578.35	7452.55	7499.8	26346.5	7497.56	6479.07	10208.4
ENSG00000265972	TXNIP	8160.12	9053.51	4691.93	8633.77	4353.47	8500.17	3195.15	8991.46	12264.4
ENSG00000105372	RPS19	9511.79	30699.2	8822.58	11024.5	10640	34672.1	10812.5	11299.7	15715.5
ENSG00000135862	LAMC1	2990.37	1409.34	27.2982	185.652	310.489	657.991	1346.86	292.661	37.8865
ENSG00000163513	TGFBR2	2140.45	3079.11	3834.67	2854.41	1385.6	2605.11	5144.41	4135.53	2870.58
ENSG00000260032	NORAD	6792.45	4090.16	8456.21	7630.32	7846.2	6230.77	11419.2	5248.39	11914
ENSG00000127603	MACF1	6923.1	3232.3	6956.72	5467.46	4539.1	5263.93	9907.18	13584.7	8101.63
ENSG00000091136	LAMB1	2548.39	183.828	35.9186	38.987	75.6886	174.569	480.042	47.2761	46.0051
ENSG00000131469	RPL27	6022.45	16912.1	6490.26	6754.96	7330.19	30348.2	7933.11	7720.26	12163.6
ENSG00000125844	RRBP1	6995.38	1256.15	854.864	1048.47	934.229	1047.41	4282.73	1413.03	541.236
ENSG00000138119	MYOF	5720.84	490.207	32.0873	258.985	571.255	335.71	2721.95	159.088	52.094
ENSG00000100219	XBP1	1745.72	2573.59	1542.59	751.428	917.102	1826.26	3239.64	286.658	1042.56
ENSG00000173706	HEG1	6018.97	1746.36	1312.23	1325.09	1920.39	859.417	2539.69	494.523	654.219
ENSG00000116251	RPL22	5362.94	12515.6	7417.44	6003.54	6164.47	22210.6	6851.51	4776.38	10117.1
ENSG00000101439	CST3	1692.21	1914.87	5.74698	90.5056	76.7935	751.99	1334.02	17.2595	29.0915
ENSG00000134352	IL6ST	9085.79	3063.79	5863.36	1579.9	2738.05	5169.93	6864.35	3650.01	4740.55
ENSG00000115306	SPTBN1	7634.73	3125.07	3180.95	3219.68	3229.19	5545.92	9101.98	3152.49	3735.21
ENSG00000132386	SERPINF1	255.742	352.336	138.406	155.484	96.6825	93.9987	99.2601	123.818	74.42
ENSG00000224373	IGHV4-59	113.277	30.6379	2.87349	108.143	0	40.2852	5.13414	110.311	2.70618
ENSG00000241351	IGKV3-11	383.613	153.19	7.66264	23.2066	2.20989	93.9987	17.1138	343.689	17.5902
ENSG00000211666	IGLV2-14	382.918	91.9138	8.62047	15.3163	1.10494	187.997	16.2581	457.752	9.47164
ENSG00000168610	STAT3	9724.45	7674.8	7556.32	9349.46	8620.21	4767.08	10330.8	4614.29	3667.55
ENSG00000162244	RPL29	5351.82	13526.6	7379.13	6394.33	5467.26	20599.1	6526.35	7283.52	10834.9
ENSG00000142949	PTPRF	7307.41	3814.42	14.8464	132.741	328.72	389.423	11137.7	66.7868	9.47164
ENSG00000101096	NFATC2	1175.16	1884.23	2691.98	3307.86	2379.49	2752.82	2684.3	2444.85	1413.3
ENSG00000123358	NR4A1	1084.12	6296.09	173.846	464.131	279.55	13253.8	2274.43	152.334	89.304
ENSG00000102144	PGK1	25152.4	11290.1	4058.81	10854.2	9187.6	5774.21	7979.31	4892.7	3925.99
ENSG00000130522	JUND	3224.57	27160.5	2023.9	3481.91	2088.89	11857.3	8450.8	1701.94	1536.43
ENSG00000178878	APOLD1	391.257	199.146	105.361	60.337	221.541	268.568	161.726	243.134	140.045
ENSG00000075223	SEMA3C	4156.5	1685.09	12.4518	105.822	306.069	1047.41	16472.9	6.00331	16.2371
ENSG00000198755	RPL10A	5483.16	15656	8651.6	7786.26	6757.28	22103.1	7468.47	5517.04	10529.8
ENSG00000211941	IGHV3-11	170.958	0	0.95783	16.7087	1.65741	53.7135	17.1138	84.0463	4.05927
ENSG00000051108	HERPUD1	2740.19	6020.35	897.487	2089.05	2167.34	12998.7	6974.73	3380.61	2154.12
ENSG00000170776	AKAP13	4980.02	4028.89	7122.91	7101.21	5314.77	7264.76	7968.19	11740.2	9587.32
ENSG00000062716	VMP1	4399.74	4136.12	3582.76	3206.22	3867.85	2981.1	4690.9	3037.67	1178.54
ENSG00000159189	C1QC	589.318	1271.47	2.87349	107.214	177.896	644.563	1149.19	23.2628	24.3556
ENSG00000147162	OGT	12506.3	7598.2	14732.9	9837.26	7663.33	9843.01	18002	11900.1	12765.7
ENSG00000120738	EGR1	2635.95	12469.6	92.9096	616.83	286.18	10366.7	2331.76	242.384	50.7409
ENSG00000167004	PDIA3	8057.96	10141.2	2312.2	4353.09	5084.39	3934.52	6546.89	2477.12	2874.64
ENSG00000120708	TGFBI	47224.7	2052.74	126.434	994.169	956.328	1127.98	3405.65	111.061	59.536
ENSG00000092199	HNRNPC	10099	13618.6	8264.64	11962.1	12563.2	21566	15076.4	7382.57	9902.59
ENSG00000182871	COL18A1	1768.65	474.888	1549.29	433.498	425.955	389.423	1353.7	226.625	276.707
ENSG00000168385	SEPTIN2	5935.58	3569.32	4151.72	4309.92	5838.52	2981.1	4724.27	3564.47	3819.78
ENSG00000149591	TAGLN	1342.65	1332.75	589.066	526.325	422.641	1181.7	259.274	748.163	380.218
ENSG00000168036	CTNNB1	5632.58	7046.72	3588.99	4379.54	7668.3	5156.5	8277.09	2937.87	3917.87
ENSG00000086062	B4GALT1	5549.18	4519.09	755.728	1522.81	1903.82	2537.96	13446.3	1703.44	805.089
ENSG00000183255	PTTG1IP	12703	5285.04	1312.71	1982.77	2378.94	1530.84	9120.81	1882.79	2120.29
ENSG00000114353	GNAI2	4796.55	6005.03	4094.25	7233.95	6350.1	3236.24	3780.44	5234.89	5052.44
ENSG00000170144	HNRNPA3	6292.78	9528.39	8599.4	7791.83	11050	7721.32	5576.54	6597.64	6532.72
ENSG00000112769	LAMA4	2318.36	873.181	6.70481	31.0968	54.1422	349.138	2439.57	7.50414	19.6198
ENSG00000161638	ITGA5	6207.3	888.5	921.912	1035.48	697.219	2242.54	3668.35	2699.24	1311.14
ENSG00000136235	GPNMB	1828.42	1455.3	16.2831	307.719	485.622	886.273	907.888	123.068	39.2396
ENSG00000196735	HLA-DQA1	481.601	45.9569	204.497	660.923	20.9939	2282.83	1860.27	4.50248	176.578
ENSG00000105640	RPL18A	7010.67	18444	9388.65	8512.16	7195.94	24547.1	7866.36	8286.82	12185.3
ENSG00000141367	CLTC	6629.14	2359.12	2929.05	2423.69	4239.11	3383.95	5441.34	3727.31	3096.55
ENSG00000211651	IGLV1-44	70.885	15.319	2.39458	116.961	0	13.4284	26.5264	104.308	10.8247
ENSG00000134294	SLC38A2	8288.68	5928.44	2488.44	2899.43	3245.77	41842.9	17788.1	31900.1	10486.5
ENSG00000137575	SDCBP	4890.37	7919.9	1502.84	1375.22	2388.89	5545.92	5662.96	1129.37	2379.41
ENSG00000102854	MSLN	4325.38	7766.71	2.87349	40.8435	55.7996	1718.83	13666.2	4.50248	12.8544
ENSG00000161011	SQSTM1	6164.22	4626.33	1701.59	3364.95	3604.88	12904.7	18867.1	3049.68	5608.56
ENSG00000196576	PLXNB2	4676.33	1960.83	340.988	1186.32	1186.71	2054.54	5520.06	271.65	173.196
ENSG00000166741	NNMT	6971.75	2068.06	2.87349	42.7001	43.0928	1087.7	3867.72	9.00496	16.9136
ENSG00000211653	IGLV1-40	234.199	45.9569	3.83132	13.4598	6.62966	53.7135	5.98983	83.2959	4.05927
ENSG00000124762	CDKN1A	6955.07	10156.5	325.662	1415.6	1663.49	8580.74	6652.14	463.005	343.685
ENSG00000211899	IGHM	700.511	827.224	228.443	1408.17	91.7102	2215.68	181.406	6760.48	357.216
ENSG00000174437	ATP2A2	5915.42	3033.15	2999.45	3218.29	3760.67	4646.22	7769.67	3791.09	2654.76
ENSG00000065978	YBX1	5895.27	10095.2	3728.35	5585.82	6059.5	15778.4	8476.47	6037.08	5500.99
ENSG00000071967	CYBRD1	2048.02	5698.65	6.70481	48.7338	91.7102	1826.26	2819.5	42.0232	30.4445
ENSG00000211611	IGKV6-21	48.6466	0	0	0	0.552471	13.4284	0	6.00331	1.35309
ENSG00000133048	CHI3L1	2003.54	229.784	0.478915	21.8142	35.9106	26.8568	5116.17	150.083	31.7976
ENSG00000157557	ETS2	2446.23	719.991	334.283	471.093	465.181	1557.69	4189.46	429.237	418.105
ENSG00000110700	RPS13	4966.12	13143.7	7669.35	6241.64	5345.16	23889.1	6209.75	6216.43	11337.5
ENSG00000187109	NAP1L1	6533.93	12010.1	12342.1	8527.95	9017.99	26051.1	9478.48	6377.02	19071.8
ENSG00000090339	ICAM1	5891.79	2496.99	227.485	660.923	918.207	2873.67	11657.9	358.698	105.541
ENSG00000140391	TSPAN3	3558.84	9405.84	699.216	765.352	581.752	1436.84	7154.43	1632.15	728.639
ENSG00000119681	LTBP2	810.313	122.552	75.1897	156.412	380.1	40.2852	796.648	165.841	79.1558
ENSG00000182578	CSF1R	1697.77	505.526	58.4277	374.09	295.572	214.854	1176.57	91.5505	18.9433
ENSG00000089280	FUS	7046.11	8839.04	8571.15	5911.17	6558.94	17443.5	7580.56	10241.6	6286.46
ENSG00000140937	CDH11	2990.37	643.396	7.66264	74.7251	120.991	147.712	4361.45	9.00496	12.1778
ENSG00000197102	DYNC1H1	11648.8	2052.74	7082.68	7757.02	5248.48	4471.65	12244.9	8725.81	7387.88
ENSG00000100600	LGMN	2069.56	995.732	302.674	526.789	708.821	966.844	2029.7	268.648	171.843
ENSG00000063177	RPL18	5654.12	15839.8	8575.46	7166.65	7115.28	27931	8314.74	8515.7	12517.4
ENSG00000233927	RPS28	3923	14139.4	4581.78	4143.3	3957.9	16369.2	6313.28	5124.58	8770.06
ENSG00000138061	CYP1B1	3738.84	214.465	18.6777	219.07	495.567	107.427	328.585	257.392	56.8298
ENSG00000152795	HNRNPDL	5592.27	8624.57	8599.4	6727.12	7145.66	19605.4	6148.99	7898.1	9274.08
ENSG00000105974	CAV1	1403.11	536.164	10.5361	160.125	245.85	389.423	121.508	28.5157	50.7409
ENSG00000188157	AGRN	12780.1	2190.61	357.75	846.575	345.847	953.415	9508.43	435.99	171.166
ENSG00000118849	RARRES1	1913.9	122.552	6.70481	14.3881	99.9973	1329.41	10083.5	6.00331	10.1482
ENSG00000143549	TPM3	10078.9	9513.07	5234.54	9759.75	9673.22	8365.88	7026.93	7323.29	6825.67
ENSG00000163399	ATP1A1	4278.81	5622.06	4767.6	4936.96	3448.53	8997.02	9718.93	5520.79	4924.57
ENSG00000172270	BSG	7710.48	9145.42	1766.72	3338.5	3345.77	2497.68	8550.92	2184.45	2325.96
ENSG00000162909	CAPN2	12167.2	5392.27	2282.99	6550.75	6722.47	3585.38	6417.68	3101.46	4812.27
ENSG00000206503	HLA-A	11172.7	41315.2	5890.66	17738.2	9629.02	14086.4	17722.2	1569.12	6498.89
ENSG00000108679	LGALS3BP	8367.21	3753.15	413.783	567.168	481.202	792.275	3340.62	1063.34	395.102
ENSG00000138071	ACTR2	9188.64	6694.39	6531.92	8764.19	11848.9	6526.2	4809.84	9535.51	7424.41
ENSG00000128595	CALU	2491.4	1317.43	568.951	641.429	1092.79	1114.56	4142.4	689.63	656.249
ENSG00000171345	KRT19	7208.03	13787.1	7.18373	190.294	96.13	1597.98	4356.32	9.00496	12.1778
ENSG00000078369	GNB1	6793.84	7322.46	4521.92	7203.31	7198.15	4861.08	7096.24	4729.86	4724.32
ENSG00000211660	IGLV2-23	356.51	45.9569	2.87349	161.518	0	13.4284	13.691	220.622	9.47164
ENSG00000163638	ADAMTS9	2228.71	153.19	2.87349	14.8522	120.991	13.4284	187.396	2.25124	10.1482
ENSG00000131459	GFPT2	5087.04	1715.72	9.09939	290.082	372.918	617.706	7694.37	31.5174	12.8544
ENSG00000114391	RPL24	5076.62	15242.4	5168.93	5300.84	6532.42	21391.4	6813.86	4053.74	8402.69
ENSG00000100906	NFKBIA	5744.47	19179.3	2089.03	2666.9	10258.3	49429.9	12649.7	1557.11	1625.74
ENSG00000111669	TPI1	17655.9	7307.14	1705.9	6804.16	4528.05	4659.65	5142.7	3942.67	2560.72
ENSG00000100650	SRSF5	7497.13	14154.7	11684.1	9920.34	9505.82	17295.8	8736.6	9323.89	12867.9
ENSG00000170458	CD14	2117.52	750.629	34.003	226.96	786.167	496.85	798.359	73.5405	36.5334
ENSG00000124831	LRRFIP1	4611	2205.93	2335.67	2500.74	3703.77	7211.04	7395.73	3369.36	2244.78
ENSG00000044115	CTNNA1	6864.73	2803.37	591.46	1569.69	2265.68	1517.41	5931.65	1426.54	754.348
ENSG00000089597	GANAB	6008.55	4411.86	5244.12	6483.45	5633.55	1960.54	5197.46	4092.76	4771.67
ENSG00000154553	PDLIM3	54.9011	0	1.91566	19.0294	9.39201	80.5703	72.7337	6.00331	10.1482
ENSG00000073921	PICALM	6600.65	3584.64	2947.72	4262.12	7572.17	4297.08	5896.56	2438.09	2518.78
ENSG00000110955	ATP5F1B	6253.86	10922.4	3597.61	6053.66	6937.93	13052.4	7007.25	5893	4982.08
ENSG00000211959	IGHV4-39	186.247	15.319	3.35241	15.7805	1.10494	0	5.13414	1.50083	2.70618
ENSG00000170027	YWHAG	5813.27	4335.27	1660.4	2592.17	2901.58	7090.19	10831.3	2413.33	2041.81
ENSG00000128272	ATF4	5260.08	9666.26	3195.8	3855.54	4408.72	30401.9	10232.3	7308.28	6762.07
ENSG00000063046	EIF4B	5994.65	5989.71	9218.64	7601.54	7530.74	10165.3	7001.26	8531.45	11377.5
ENSG00000147872	PLIN2	2301.68	4702.92	358.707	973.747	1886.14	3343.67	4048.27	580.07	706.99
ENSG00000109472	CPE	435.039	199.146	4.31024	35.274	41.9878	228.283	3050.54	5.2529	49.3878
ENSG00000113083	LOX	30803.7	857.862	60.8222	336.031	399.989	537.135	2288.97	29.2661	10.1482
ENSG00000107581	EIF3A	6695.85	3906.33	7269.93	4861.77	6474.41	7895.89	11085.5	9357.66	9485.84
ENSG00000182899	RPL35A	4631.85	13802.4	5900.24	5129.11	5207.59	25849.6	6620.48	4596.28	8858.01
ENSG00000159140	SON	10526.4	6112.26	13686	10741.9	9590.9	9708.72	13089.5	17366.1	13662.2
ENSG00000152661	GJA1	2732.55	689.353	19.6355	96.0751	316.014	402.852	827.453	8.25455	15.5605
ENSG00000136167	LCP1	8162.2	16406.6	8247.4	15645.9	16764.7	15711.2	10946.8	15181.6	9605.59
ENSG00000173821	AC124319.1	43337.1	12469.6	21498.5	45853.8	28716.9	6109.92	20351.7	37336.1	13591.1
ENSG00000130255	RPL36	5340.7	10662	3958.23	3466.6	3625.87	12300.4	4930.49	2961.13	6766.13
ENSG00000131051	RBM39	7394.97	10478.2	9838.36	5851.77	7732.39	20357.4	13352.2	8644.77	11353.8
ENSG00000213741	RPS29	4486.6	23821	5945.25	6782.35	7005.34	30240.7	6077.97	5329.44	10763.8
ENSG00000101160	CTSZ	2213.42	2604.22	441.56	1681.55	1909.89	10259.3	3537.42	1349.24	569.651
ENSG00000198918	RPL39	6255.25	18275.5	7374.34	7499.89	7530.18	37545.8	6379.17	4948.98	9125.92
ENSG00000116560	SFPQ	7767.47	12025.4	10744	7349.05	7766.64	41641.4	12498.2	15087.1	6499.57
ENSG00000145423	SFRP2	125.786	2650.18	1.43675	18.1011	13.8118	80.5703	23.1036	21.762	14.884
ENSG00000113721	PDGFRB	1000.03	229.784	1.43675	9.74675	10.497	53.7135	22.248	80.2943	18.2667
ENSG00000211945	IGHV1-18	182.077	30.6379	2.39458	18.1011	1.65741	0	6.84552	90.0496	1.35309
ENSG00000147526	TACC1	2088.33	2037.42	4044.92	3289.76	4888.82	6861.91	5655.26	3094.71	2990.33
ENSG00000011028	AC080038.1	268.946	2834.01	11.9729	75.1892	138.67	590.849	306.337	15.0083	10.8247
ENSG00000028137	TNFRSF1B	9078.15	11443.3	11205.2	15408.7	20006.6	2014.26	7923.69	6082.1	5017.94
ENSG00000067167	TRAM1	8290.77	4733.56	3896.45	4406.92	5707.03	4350.8	9624.81	2734.51	3980.79
ENSG00000156482	RPL30	3716.6	10784.5	4896.43	4525.28	4314.25	24506.8	5525.19	4395.92	8682.11
ENSG00000120594	PLXDC2	865.909	965.094	11.015	95.1469	100.55	174.569	2433.58	29.2661	8.79509
ENSG00000131446	MGAT1	4802.11	2466.35	2079.93	3811.44	2752.41	1651.69	7394.88	4345.65	3698
ENSG00000068697	LAPTM4A	3818.06	3814.42	1056.01	1542.77	1837.52	3813.66	3730.81	838.212	1319.94
ENSG00000058262	SEC61A1	6967.58	3661.23	2147.93	2779.68	3329.19	2255.97	6880.61	2883.84	2510.66
ENSG00000106483	SFRP4	746.377	45.9569	2.39458	40.3794	23.7563	0	47.063	5.2529	12.1778
ENSG00000240382	IGKV1-17	37.5274	15.319	0.478915	5.56957	0	26.8568	16.2581	91.5505	6.76545
ENSG00000030582	GRN	3157.16	1853.59	293.575	1184	940.306	1423.41	2135.8	2167.19	557.473
ENSG00000244437	IGKV3-15	109.107	15.319	2.39458	5.56957	0	13.4284	116.374	174.096	7.442
ENSG00000111897	SERINC1	5036.31	6924.17	4302.57	4053.26	5556.2	5210.21	6499.83	3406.13	5476.63
ENSG00000109475	RPL34	4287.15	14951.3	6786.71	5450.29	5289.36	28172.8	6874.62	5542.56	11169.1
ENSG00000118503	TNFAIP3	6039.82	35509.3	2429.06	7327.24	16204.5	16919.8	33271	2593.43	4386.72
ENSG00000091490	SEL1L3	1232.84	1868.91	1629.75	2579.18	2057.4	2242.54	3225.95	3969.69	1719.1
ENSG00000170348	TMED10	3930.64	4626.33	2460.19	2895.25	2709.32	1597.98	4260.48	1365	2323.93
ENSG00000114867	EIF4G1	9529.17	3002.52	4932.83	6148.34	5693.22	4041.94	8807.62	6789.74	4970.58
ENSG00000179820	MYADM	1858.99	5683.33	379.301	841.006	799.426	1033.99	2354	202.612	308.505
ENSG00000145741	BTF3	4588.76	9436.48	4637.34	4445.45	4654.02	12273.5	5458.45	4716.35	7870.93
ENSG00000152291	TGOLN2	5932.1	3554	9497.37	8780.43	7127.43	3316.81	6203.76	9033.48	8073.89
ENSG00000107372	ZFAND5	4500.5	8425.43	2279.16	2929.13	4386.62	11682.7	6069.41	2416.33	4422.58
ENSG00000121966	CXCR4	5802.15	57890.3	13377.1	11576.8	9689.24	12434.7	15675.4	6446.8	12816.5
ENSG00000211648	IGLV1-47	229.334	0	0.478915	10.675	1.65741	40.2852	111.24	149.332	6.76545
ENSG00000156976	EIF4A2	9195.59	11765	8879.57	8207.23	9487.04	32926.4	13514.8	7053.89	13222.4
ENSG00000135047	CTSL	11972.6	2159.97	639.831	1325.56	4287.18	1195.13	6969.6	150.833	134.633
ENSG00000125868	DSTN	2092.5	2435.71	542.132	644.678	1045.28	1866.55	2885.39	257.392	522.293
ENSG00000162692	VCAM1	631.016	428.931	10.0572	97.9317	6.62966	443.137	231.036	48.0265	11.5013
ENSG00000169604	ANTXR1	901.352	1777	4.78915	37.5946	125.963	147.712	2813.51	20.2612	14.2075
ENSG00000110651	CD81	2770.77	5683.33	1147	1747.45	1266.82	2605.11	3415.92	1781.48	963.401
ENSG00000072110	ACTN1	6198.27	1439.98	1034.46	1034.08	940.306	469.994	1894.5	1279.46	1474.87
ENSG00000143761	ARF1	5243.41	5729.29	3141.2	4679.83	5239.64	2967.67	5148.69	4229.33	4434.75
ENSG00000162434	JAK1	9043.4	5668.02	9699.47	10804.5	12414.6	9144.73	13599.5	10551.6	12220.4
ENSG00000102024	PLS3	1629.66	1072.33	10.5361	46.4131	169.056	281.996	1377.66	34.519	69.6842
ENSG00000172037	LAMB2	1266.2	1041.69	4.78915	68.6914	208.282	335.71	2301.81	24.0132	16.9136
ENSG00000148175	STOM	1633.83	2987.2	345.298	800.626	544.737	429.708	1630.09	993.548	283.473
ENSG00000132465	JCHAIN	255.047	704.672	14.8464	171.264	18.2316	510.279	71.878	802.943	12.1778
ENSG00000221983	UBA52	5968.24	16299.4	5782.9	6090.33	5633	20626	6585.39	5695.64	8707.14
ENSG00000081237	PTPRC	17254.2	12301.1	28416	18886	24052.4	12058.7	36212.8	37991.9	37848
ENSG00000092841	MYL6	4414.33	14062.8	1235.6	3658.75	4925.83	5438.5	5329.24	2439.6	1842.23
ENSG00000185896	LAMP1	3047.36	4120.8	2678.57	3798.91	4560.1	4041.94	4648.11	2362.3	3079.63
ENSG00000128510	CPA4	443.379	1148.92	1.43675	11.1391	35.9106	0	4340.06	4.50248	1.35309
ENSG00000115310	RTN4	6276.8	4304.63	1709.73	2186.99	2088.89	5022.22	5099.92	1810.75	1949.8
ENSG00000109332	UBE2D3	8486.05	12132.6	5349.48	6216.57	7145.66	16288.6	14736.7	5883.99	5986.07
ENSG00000133800	LYVE1	77.1396	214.465	0.478915	1.39239	0	80.5703	557.055	4.50248	6.08891
ENSG00000108691	CCL2	11411.8	1669.77	39.75	290.546	2224.25	429.708	2735.64	65.286	15.5605
ENSG00000130203	APOE	1002.81	1240.84	33.5241	258.521	175.686	2511.11	1256.15	141.078	69.0076
ENSG00000228253	MT-ATP8	668.543	566.802	625.942	631.682	575.123	4740.22	4504.35	1555.61	1133.89
ENSG00000131236	CAP1	6997.46	5453.55	3498.48	7618.25	8667.72	3330.24	4836.36	5827.71	4957.05
ENSG00000240583	AQP1	1428.12	9007.55	11.015	11.6033	43.6452	1342.84	2080.18	5.2529	25.0322
ENSG00000270550	IGHV3-30	222.384	0	2.87349	15.7805	1.65741	0	6.84552	61.5339	7.442
ENSG00000123342	MMP19	839.501	137.871	10.0572	141.096	180.658	107.427	1591.58	10.5058	12.1778
ENSG00000185787	MORF4L1	4803.5	8333.51	3402.69	4247.26	5365.05	5317.64	5510.65	4194.81	4469.94
ENSG00000117523	PRRC2C	8625.04	3462.08	11675.5	6959.18	7454.49	9091.02	9773.7	11085.9	9802.47
ENSG00000102802	MEDAG	1319.02	168.509	19.1566	185.652	82.3182	120.855	298.636	2.25124	21.6495
ENSG00000163466	ARPC2	6483.2	7674.8	5383.96	6878.89	7304.22	6875.33	5557.71	6719.96	5572.03
ENSG00000133872	SARAF	7009.97	23346.1	12285.1	10763.2	9910.23	18249.2	16298.3	9905.46	13576.9
ENSG00000243290	IGKV1-12	114.667	137.871	0	4.17718	0	147.712	1.71138	79.5439	0.676545
ENSG00000188042	ARL4C	3979.29	6066.31	9205.71	7799.26	5163.4	2725.96	3827.5	2627.95	5175.57
ENSG00000257017	HP	110.497	398.293	2.87349	0.464131	1.65741	295.424	7680.68	36.7703	230.702
ENSG00000135048	CEMIP2	2727.68	3753.15	3591.86	3230.82	2156.85	6821.62	6675.24	2478.62	6025.99
ENSG00000071127	WDR1	6551.3	6342.05	5569.3	8454.15	8099.78	4095.66	7248.55	5484.02	5155.95
ENSG00000196562	SULF2	1330.14	1700.4	34.9608	66.3707	105.522	214.854	442.392	144.83	14.2075
ENSG00000115461	IGFBP5	1694.29	5545.46	0.95783	20.8859	2.76236	255.139	460.362	6.75372	14.884
ENSG00000058668	ATP2B4	6759.79	3967.61	9487.79	10696.8	8732.91	2457.39	11083.8	5642.36	5319
ENSG00000116741	RGS2	651.864	6250.14	321.352	719.867	724.29	12125.8	2786.98	529.042	1177.87
ENSG00000211973	IGHV1-69	110.497	0	0	0	0	0	33.3719	29.2661	0.676545
ENSG00000171988	JMJD1C	2735.33	3171.02	2639.3	1271.72	1604.38	9896.72	6572.56	3559.21	3162.17
ENSG00000077549	CAPZB	2679.04	5943.76	1996.12	3558.96	4342.42	1866.55	2526	2883.84	2130.44
ENSG00000178726	THBD	1425.34	1057.01	24.9036	183.332	430.928	349.138	1811.5	10.5058	12.1778
ENSG00000145685	LHFPL2	2629	91.9138	61.7801	375.018	253.032	711.704	4043.14	586.073	53.4471
ENSG00000096060	FKBP5	823.517	1455.3	2247.55	1756.27	925.389	751.99	1331.45	2120.67	1961.98
ENSG00000079308	TNS1	3702.7	643.396	8.14156	159.661	137.565	214.854	325.162	28.5157	29.768
ENSG00000161203	AP2M1	7973.87	4733.56	2246.11	4081.1	4149.61	1651.69	4425.63	3374.61	3528.18
ENSG00000087074	PPP1R15A	5021.02	18030.4	949.21	3241.96	2776.17	33289	9788.24	2156.69	5307.5
ENSG00000060237	WNK1	5220.47	4748.88	6814.96	9123.43	6755.07	7949.6	9136.21	9989.51	6527.99
ENSG00000119138	KLF9	1286.35	1256.15	1233.69	1209.99	867.38	1893.4	1268.99	601.081	972.196
ENSG00000163520	FBLN2	41.6971	137.871	3.83132	12.9957	12.7068	40.2852	45.3516	24.7637	3.38273
ENSG00000060138	YBX3	3391.36	2711.46	135.533	212.108	439.215	1866.55	2796.4	144.83	103.511
ENSG00000106682	EIF4H	5485.25	5116.53	3438.13	4639.92	4690.48	5545.92	5336.94	3764.08	3973.35
ENSG00000145623	OSMR	8402.65	1087.65	39.75	115.569	314.356	335.71	2503.75	27.7653	21.6495
ENSG00000100292	HMOX1	5918.9	704.672	39.75	815.014	411.039	7922.75	14465.4	238.632	278.737
ENSG00000234745	HLA-B	12117.9	53478.5	7052.03	8702.46	11180.4	8647.88	11692.2	15421.8	7016.45
ENSG00000116679	IVNS1ABP	8367.91	7996.5	13905.3	6318.68	4120.33	12448.1	9049.78	3166	6589.55
ENSG00000163131	CTSS	3303.8	2711.46	1614.42	2589.39	2584.46	2645.39	1529.97	2005.11	1391.65
ENSG00000138080	EMILIN1	215.435	199.146	19.1566	39.9153	19.889	93.9987	41.0731	57.7819	25.7087
ENSG00000130402	ACTN4	5914.73	2634.86	2541.12	4960.17	5338.53	966.844	8259.12	3905.9	2514.72
ENSG00000151726	ACSL1	1080.65	934.457	881.683	850.288	1584.49	3961.37	3335.48	812.698	564.915
ENSG00000168209	DDIT4	2304.46	1945.51	559.373	1239.69	1940.83	1745.69	1749.89	207.865	197.551
ENSG00000047849	MAP4	3742.31	2251.89	2182.9	4584.22	3740.78	1127.98	3973.83	2702.99	2147.35
ENSG00000115268	RPS15	4789.6	12362.4	4943.84	4566.12	4398.22	12555.5	5395.98	4833.41	7573.93
ENSG00000198467	TPM2	2358.66	1179.56	272.503	204.682	314.356	792.275	2079.33	623.594	384.278
ENSG00000087116	ADAMTS2	1237.01	91.9138	3.35241	25.9913	54.6947	80.5703	1667.74	8.25455	10.1482
ENSG00000041982	TNC	649.084	122.552	4.31024	249.703	207.177	26.8568	617.809	113.312	19.6198
ENSG00000070831	CDC42	5633.27	9084.14	4028.63	7035.76	6987.66	5693.64	5421.66	3718.3	4105.95
ENSG00000189403	HMGB1	3178.01	7138.64	4142.14	4328.95	5128.04	8889.59	5354.06	3925.41	4871.13
ENSG00000118680	MYL12B	5013.38	5867.16	2269.58	3555.71	4640.76	3061.67	3784.72	2507.88	3191.26
ENSG00000165280	VCP	6040.51	5974.39	3401.26	6568.38	6811.97	6539.62	7902.3	5375.96	4442.87
ENSG00000205403	CFI	1223.11	551.483	0.95783	14.8522	12.7068	792.275	1523.98	1.50083	10.1482
ENSG00000082641	NFE2L1	5057.85	1577.85	1421.42	2129.43	1811	966.844	2677.46	3260.55	2250.19
ENSG00000211947	IGHV3-21	421.835	30.6379	1.43675	20.4218	2.20989	107.427	17.1138	141.828	11.5013
ENSG00000172757	CFL1	4232.95	12071.3	2880.2	6025.81	5846.8	5693.64	4035.44	3912.66	3317.1
ENSG00000182944	EWSR1	4601.97	6066.31	6664.58	5829.95	6316.4	11776.7	7136.46	8433.15	5324.41
ENSG00000090863	GLG1	4028.63	2527.63	4557.36	5179.24	4093.81	2417.11	5652.69	4260.85	4988.17
ENSG00000102804	TSC22D1	1762.4	934.457	597.207	597.337	518.218	953.415	1397.34	309.921	491.848
ENSG00000135677	GNS	2060.53	1807.64	906.108	1361.76	1451.34	1087.7	2555.95	968.784	1290.17
ENSG00000138674	SEC31A	4179.44	1976.15	1955.89	2027.32	2127.01	1383.12	3338.05	1741.71	2014.08
ENSG00000118816	CCNI	5146.81	9773.5	5880.6	6664.46	5416.98	8822.45	6252.53	4497.98	7383.14
ENSG00000099622	CIRBP	4969.59	9421.16	5819.3	6291.3	5894.87	11615.6	3898.53	3249.29	6958.27
ENSG00000075785	RAB7A	3696.44	3094.43	2080.41	3198.79	3200.47	3357.1	6061.71	2532.65	2578.99
ENSG00000113369	ARRDC3	5834.11	3079.11	988.002	2009.22	1494.99	3061.67	5011.78	322.678	5700.57
ENSG00000004399	PLXND1	1835.37	781.267	283.039	836.364	408.276	335.71	2234.21	585.323	725.933
ENSG00000072778	ACADVL	5030.06	5897.8	2698.69	4718.36	5503.17	6391.91	8826.45	6052.09	3882.02
ENSG00000168461	RAB31	1786.72	551.483	26.3403	260.842	467.391	1168.27	1660.9	408.225	43.9754
ENSG00000104408	EIF3E	3797.21	4856.11	6728.76	3193.22	3839.12	10568.1	4474.41	2457.61	7000.21
ENSG00000083845	RPS5	3667.95	10585.4	6230.69	5609.95	4732.47	17698.6	5528.62	5378.97	8203.79
ENSG00000104635	SLC39A14	10037.2	551.483	348.65	509.152	1003.84	1221.98	14229.3	546.301	240.174
ENSG00000119335	SET	6053.02	6740.34	4053.54	6274.12	6199.83	7519.9	5576.54	6681.68	5376.51
ENSG00000159388	BTG2	2557.42	15242.4	2623.98	3622.54	3313.72	4941.65	2359.14	7082.4	3593.13
ENSG00000169714	CNBP	5427.57	9819.45	5038.67	5652.65	6833.52	7036.47	5504.66	5054.04	6826.34
ENSG00000186081	KRT5	2489.31	3599.96	12.4518	103.037	245.297	711.704	13780	55.5306	7.442
ENSG00000116754	SRSF11	7505.47	5499.51	10440.8	5141.18	6565.57	9668.44	10204.1	11091.9	11865.3
ENSG00000143933	CALM2	4310.09	7261.19	2107.71	2720.74	3777.8	6861.91	3741.93	2338.29	3166.91
ENSG00000083857	FAT1	1758.23	413.612	7.18373	129.493	168.504	738.561	6747.98	27.0149	7.442
ENSG00000183283	DAZAP2	4041.14	9130.1	5315.48	7679.51	7713.6	8956.73	4729.4	5022.52	6286.46
ENSG00000248527	MTATP6P1	3214.15	7261.19	2809.8	4322.45	3395.49	17738.9	9188.4	2873.33	2441.65
ENSG00000120885	CLU	1651.9	3446.77	25.3825	180.547	218.779	3021.39	889.062	81.0447	34.5038
ENSG00000150687	PRSS23	5494.28	1118.28	6.70481	126.244	47.5125	13.4284	270.398	18.0099	9.47164
ENSG00000151914	DST	531.638	137.871	63.2168	78.4382	113.257	214.854	616.097	56.281	73.7434
ENSG00000101335	MYL9	332.882	2236.57	0	25.9913	57.457	322.281	26.5264	39.0215	18.2667
ENSG00000164949	GEM	641.44	2374.44	12.4518	335.103	158.559	1503.98	1101.27	43.524	154.929
ENSG00000114942	EEF1B2	2913.23	6832.26	5093.26	4080.18	3605.98	19659.2	4241.66	3643.26	7927.08
ENSG00000118705	RPN2	2618.58	3492.72	1842.39	2624.2	3339.14	1718.83	3430.46	2197.21	1937.63
ENSG00000091527	CDV3	7419.99	7506.29	5096.62	7243.23	7316.93	8379.31	10326.5	5183.86	5766.2
ENSG00000071054	MAP4K4	6586.75	2052.74	3681.9	2827.02	2855.17	10554.7	8545.78	3818.86	1839.53
ENSG00000075415	SLC25A3	3231.52	8701.17	3148.87	4016.13	5038.54	7828.75	5633.87	3899.15	4323.12
ENSG00000128591	FLNC	6939.78	444.25	32.5662	292.867	474.02	698.276	3456.99	45.0248	16.9136
ENSG00000152601	MBNL1	7179.54	7889.26	13997.3	7240.91	10569.3	8218.17	9385.21	12529.7	9510.87
ENSG00000204291	COL15A1	2076.51	229.784	10.5361	39.4511	14.9167	0	27.3821	10.5058	25.7087
ENSG00000164938	TP53INP1	1451.06	4611.01	931.969	1810.11	2020.94	3075.1	2163.19	5568.07	2004.6
ENSG00000075420	FNDC3B	4359.43	781.267	365.412	336.031	1050.8	980.272	5424.22	284.407	196.875
ENSG00000266412	NCOA4	3393.45	1991.46	2210.19	2872.97	3682.22	1611.41	4488.1	2901.1	2508.63
ENSG00000138760	SCARB2	4515.1	1240.84	481.789	580.628	679.54	886.273	1366.54	357.197	445.843
ENSG00000137491	SLCO2B1	373.884	352.336	11.015	161.053	149.72	134.284	802.638	11.2562	18.9433
ENSG00000077147	TM9SF3	4457.42	3354.85	4327.96	2666.43	3910.39	3625.66	5747.67	2852.32	2953.12
ENSG00000133816	MICAL2	3327.43	857.862	881.204	1318.6	2282.81	644.563	1562.49	441.243	414.046
ENSG00000127481	UBR4	8231.7	2006.78	7902.58	8210.94	4856.22	9104.45	13418.1	17274.5	8743.67
ENSG00000090382	LYZ	1516.38	781.267	6.2259	351.811	821.525	980.272	372.225	162.089	34.5038
ENSG00000179344	HLA-DQB1	443.379	0	219.343	776.491	7.7346	2672.25	1569.34	3.75207	386.307
ENSG00000085733	CTTN	3391.36	980.413	65.6114	151.307	166.846	671.419	2888.81	48.7769	50.7409
ENSG00000117868	ESYT2	4111.33	2834.01	3399.82	3053.05	2628.66	3048.24	4055.97	2489.12	3384.08
ENSG00000166913	YWHAB	6793.84	8425.43	7040.53	9325.32	12302.4	4847.65	6968.74	5221.38	9416.16
ENSG00000135535	CD164	9923.9	5116.53	4590.4	5541.73	5895.97	6848.48	5753.66	4732.86	5613.3
ENSG00000179094	AC129492.1	1163.35	12362.4	1221.23	1361.3	986.161	5572.78	3153.22	1606.64	1605.44
ENSG00000163660	CCNL1	7079.47	11856.9	8765.11	4463.55	6155.63	29529	14700.8	5625.85	7069.9
ENSG00000133657	ATP13A3	6346.99	1976.15	2649.36	2623.73	7888.74	7399.04	9514.42	3698.79	2366.56
ENSG00000129657	SEC14L1	2669.31	1853.59	2011.92	3057.7	4155.69	2819.96	3528.87	2067.39	1272.58
ENSG00000160710	ADAR	19334.9	5836.52	10509.3	14570.9	10487.6	4887.93	7400.87	10526.8	8789.68
ENSG00000196498	NCOR2	5037.01	1991.46	2237.97	2899.43	2154.09	5317.64	4021.75	3013.66	1531.7
ENSG00000072274	TFRC	2089.02	5545.46	2672.35	3351.03	14040	5237.07	6574.27	3482.67	1971.45
ENSG00000107957	SH3PXD2A	1973.66	719.991	1397.47	1763.7	1739.18	859.417	2678.31	1649.41	1263.79
ENSG00000159840	ZYX	3030.68	2941.24	1457.82	2314.16	2092.21	1248.84	2829.77	1653.91	1861.85
ENSG00000178695	KCTD12	1192.54	321.698	161.873	242.741	327.063	1020.56	758.997	87.048	275.354
ENSG00000171992	SYNPO	2359.36	1011.05	20.5934	111.856	61.3243	281.996	222.48	611.587	20.9729
ENSG00000147140	NONO	4764.58	5928.44	5441.91	5999.36	5702.06	7734.75	6610.21	5297.17	5727.63
ENSG00000168615	ADAM9	2539.35	321.698	43.1024	118.353	343.637	295.424	2884.53	63.7852	40.5927
ENSG00000084070	SMAP2	2098.75	6740.34	3382.1	5398.31	7146.77	4095.66	4132.99	4353.15	4824.44
ENSG00000111057	KRT18	14375.1	8670.53	92.9096	228.353	814.895	1879.97	4788.44	44.2744	81.862
ENSG00000184347	SLIT3	51.4264	398.293	1.43675	14.8522	27.0711	0	143.756	5.2529	4.05927
ENSG00000198561	CTNND1	3985.54	934.457	332.367	369.448	353.582	913.13	2229.93	634.1	220.554
ENSG00000136942	RPL35	4144.69	9926.69	3998.94	3995.24	4521.98	14301.2	4753.36	3044.43	6000.28
ENSG00000119655	NPC2	1458.7	1899.55	232.753	498.477	569.045	1127.98	1154.33	347.442	646.101
ENSG00000146278	PNRC1	6444.98	11458.6	3433.82	3801.7	3040.25	12689.8	5299.29	3512.69	3765.65
ENSG00000011304	PTBP1	7332.43	5407.59	5628.21	6520.11	5784.93	5760.78	9045.5	8971.2	5251.35
ENSG00000221869	CEBPD	2177.98	919.138	4.78915	56.624	143.09	268.568	1583.03	27.0149	23.0025
ENSG00000152818	UTRN	2786.06	1562.53	1544.98	1354.33	1347.48	1584.55	1439.27	3683.03	3262.98
ENSG00000069275	NUCKS1	3168.98	2481.67	3600.96	2568.5	3192.18	2242.54	1344.29	2476.37	3131.05
ENSG00000185201	IFITM2	3702.7	4090.16	286.391	1154.29	824.287	1181.7	1607.84	641.604	578.446
ENSG00000072364	AFF4	4823.66	1715.72	3479.8	1764.63	2151.88	7358.76	6509.24	4015.46	3172.32
ENSG00000150938	CRIM1	3197.47	2573.59	606.307	203.289	564.073	671.419	3421.91	290.41	172.519
ENSG00000129351	ILF3	6734.08	6924.17	9755.5	8962.37	7622.45	12622.7	9855.84	14371.9	7404.79
ENSG00000160255	ITGB2	3834.74	7950.54	2986.04	6586.48	4758.44	1866.55	1837.17	3216.27	2757.6
ENSG00000165732	DDX21	3241.95	3247.62	2672.35	1629.56	3556.81	9990.72	7364.07	3467.66	2520.81
ENSG00000165124	SVEP1	54.9011	45.9569	0.95783	4.64131	1.10494	0	3025.72	6.75372	6.76545
ENSG00000166033	HTRA1	749.157	5591.42	2.39458	37.1305	102.207	429.708	402.175	12.0066	26.3853
ENSG00000132510	KDM6B	2808.3	6388.01	3378.75	2911.49	2545.79	16490.1	11299.4	2908.6	3474.06
ENSG00000198668	CALM1	5141.94	11872.2	7435.64	8120.44	7402.01	15133.8	5920.52	6410.03	8985.2
ENSG00000165168	CYBB	1797.14	520.845	68.9638	633.075	861.855	1530.84	694.821	2039.62	94.0398
ENSG00000117519	CNN3	2246.78	842.543	45.018	90.5056	133.698	765.418	266.12	162.84	46.6816
ENSG00000138448	ITGAV	1870.81	428.931	434.855	448.815	824.84	1973.97	3158.35	391.716	571.004
ENSG00000211659	IGLV3-25	244.623	168.509	0	8.81849	0	13.4284	0.855691	66.7868	6.76545
ENSG00000108946	PRKAR1A	6141.98	5928.44	4315.5	6432.39	6535.74	3773.38	5830.68	3463.16	5326.44
ENSG00000123349	PFDN5	2786.75	7521.61	3163.23	3091.11	3163.45	10823.3	3841.19	2742.01	4674.25
ENSG00000102317	RBM3	2217.59	5867.16	2643.61	2816.35	3930.83	7439.33	3110.44	2189.71	2211.63
ENSG00000166340	TPP1	4633.93	3737.83	3945.3	7511.96	7092.63	2846.82	3206.27	5603.34	6914.97
ENSG00000184007	PTP4A2	5960.6	5101.21	4538.68	5894	5563.39	5975.63	6460.46	5090.81	4331.24
ENSG00000013441	CLK1	5007.12	14798.1	7341.77	4111.27	5817.52	28360.8	8578.3	4952.73	10437.7
ENSG00000162734	PEA15	3157.86	2205.93	511.481	1448.55	2626.45	8285.31	4000.35	1486.57	937.692
ENSG00000160691	SHC1	6775.77	1179.56	846.722	1162.65	1024.28	1074.27	3415.92	922.258	1001.29
ENSG00000211962	IGHV1-46	123.006	0	0.95783	11.1391	0	13.4284	83.002	39.0215	4.73582
ENSG00000086758	HUWE1	7914.8	3216.98	10507.9	10147.3	8074.37	10729.3	9022.4	9843.93	7075.31
ENSG00000186480	INSIG1	1900.69	5713.97	622.59	1165.9	777.327	4055.37	4153.52	1290.71	1449.16
ENSG00000067182	TNFRSF1A	4180.83	1256.15	280.165	654.425	574.018	375.995	3124.13	647.607	571.681
ENSG00000134250	NOTCH2	5253.13	1853.59	3671.36	3290.69	2664.02	4391.08	5343.79	2559.66	2673.03
ENSG00000282651	IGHV5-10-1	170.263	30.6379	0	12.0674	0.552471	0	15.4024	0.750414	0
ENSG00000172809	RPL38	3069.6	9896.05	3286.8	3130.56	3115.94	15684.4	3670.06	2778.78	6051.7
ENSG00000133639	BTG1	5679.14	38297.4	10313.9	12365.8	12008	22720.8	13368.5	7191.97	7427.11
ENSG00000035403	VCL	1389.21	704.672	240.894	342.065	340.322	765.418	1426.44	426.985	428.93
ENSG00000112081	SRSF3	4903.57	13082.4	5255.62	6201.72	6786.56	21740.6	5124.73	4322.38	6718.77
ENSG00000149115	TNKS1BP1	4959.17	1011.05	445.391	595.944	566.283	362.566	6767.66	504.278	478.994
ENSG00000074695	LMAN1	5084.26	1317.43	2367.76	1807.33	3165.11	2175.4	3747.92	1736.46	1583.79
ENSG00000128567	PODXL	1230.76	137.871	22.509	31.5609	284.523	335.71	313.183	101.306	33.1507
ENSG00000180879	SSR4	1269.68	2726.77	652.761	1089.32	1275.1	1356.27	1751.6	926.011	902.512
ENSG00000100380	ST13	2542.13	4503.77	2850.5	2943.98	2933.07	15805.2	5963.31	2669.97	4143.16
ENSG00000115091	ACTR3	5930.71	5162.49	4677.56	5913.03	8765.51	4981.93	4432.48	5417.99	3712.88
ENSG00000130985	UBA1	6308.07	5468.87	3691.48	6402.22	5565.6	5707.06	5694.62	5213.12	4063.33
ENSG00000120063	GNA13	3843.77	4519.09	3722.13	3471.24	4088.29	8124.17	7581.42	3853.37	4074.16
ENSG00000152234	ATP5F1A	3598.46	7184.59	3761.4	5373.25	5746.25	3075.1	2725.37	5177.1	4534.21
ENSG00000146674	IGFBP3	15977.6	1026.37	190.129	296.116	657.993	187.997	145.467	17.2595	42.6224
ENSG00000118985	ELL2	2772.16	3033.15	471.731	478.519	738.654	7049.9	5701.47	420.232	546.649
ENSG00000229117	RPL41	2935.47	7215.23	3128.27	3336.64	3612.61	9198.44	3960.99	2312.78	4392.81
ENSG00000115457	IGFBP2	232.809	168.509	1.43675	19.9576	18.2316	134.284	100.971	9.00496	10.8247
ENSG00000111348	ARHGDIB	4088.4	17846.6	6373.4	10319.5	11107.4	5747.35	5499.52	7552.16	7873.63
ENSG00000122218	COPA	4459.5	2267.21	2958.26	3439.21	3536.37	6391.91	4475.26	3619.25	3140.52
ENSG00000110422	HIPK3	3046.67	2114.02	3800.19	2083.02	2585.57	2484.25	4403.38	1447.55	3262.98
ENSG00000107438	PDLIM1	2664.44	704.672	19.6355	98.8599	87.8429	953.415	508.28	405.223	40.5927
ENSG00000182670	TTC3	2492.79	1179.56	6239.79	2474.75	2737.5	3880.8	4318.67	3856.38	5390.04
ENSG00000050405	LIMA1	9839.12	1409.34	637.436	998.346	1175.66	792.275	1228.77	538.797	769.909
ENSG00000130702	LAMA5	4109.94	1654.45	22.0301	121.138	378.995	1289.13	3728.24	1067.09	36.5334
ENSG00000105373	NOP53	4075.89	9007.55	10577.3	8230.9	5183.84	15872.4	6671.82	9906.96	13840.8
ENSG00000175215	CTDSP2	4683.97	2451.03	3021.48	4125.2	2618.16	2443.97	5212.01	7485.38	6833.78
ENSG00000159176	CSRP1	862.434	1976.15	543.09	978.853	1103.29	698.276	1763.58	530.543	631.893
ENSG00000120889	TNFRSF10B	3001.49	2006.78	1113	1496.36	1127.04	2860.25	4973.27	880.235	1863.88
ENSG00000171603	CLSTN1	2810.38	2359.12	3375.39	4108.02	3041.35	1195.13	5408.82	4178.3	2719.04
ENSG00000173575	CHD2	5736.82	4090.16	6153.58	4010.56	4515.9	18464	14036.7	7363.06	5890.68
ENSG00000110077	MS4A6A	68.8002	551.483	13.8885	56.1599	6.62966	281.996	643.479	34.519	47.3582
ENSG00000170275	CRTAP	937.489	1531.9	1379.28	1578.51	1583.38	1248.84	1082.45	1389.02	1761.05
ENSG00000163110	PDLIM5	2563.67	582.12	454.969	493.836	659.651	1450.27	3592.19	451.749	466.816
ENSG00000134308	YWHAQ	3555.37	5438.23	1549.77	2814.03	2198.28	3410.81	3045.4	2222.73	2346.94
ENSG00000184640	SEPTIN9	7363.7	9145.42	7575.96	13179.5	8565.51	3692.81	5244.53	7474.12	7895.96
ENSG00000144381	HSPD1	5647.17	20987	2716.41	2393.52	3707.63	101116	19395.1	2633.95	3156.76
ENSG00000169715	MT1E	3014	1654.45	3.35241	60.8012	99.4448	537.135	4960.44	6.75372	29.0915
ENSG00000104852	SNRNP70	5396.29	5055.26	10468.1	8033.65	5971.66	4673.08	7027.79	7381.82	10631.2
ENSG00000142864	SERBP1	4912.61	5499.51	4233.61	4205.03	5050.14	4283.66	4846.63	4792.89	4560.59
ENSG00000179010	MRFAP1	3977.2	6985.45	2357.7	2531.37	3396.59	2014.26	4444.46	2320.28	2756.25
ENSG00000099860	GADD45B	1474.69	5055.26	542.132	706.872	785.614	52290.1	1904.77	492.271	1135.92
ENSG00000168056	LTBP3	2061.22	3508.04	5108.11	3896.84	2297.18	1812.83	3131.83	6115.87	3879.99
ENSG00000138668	HNRNPD	5477.6	5162.49	4713.96	6200.33	5626.37	7412.47	4010.62	4969.24	4356.95
ENSG00000167552	TUBA1A	709.545	5530.14	266.277	1490.79	1276.76	6338.2	2305.23	625.845	2221.1
ENSG00000008294	SPAG9	3162.72	1271.47	1939.13	1468.51	1970.11	7627.32	5870.89	1759.72	2016.11
ENSG00000104904	OAZ1	4442.82	11979.4	2514.3	4600.47	4644.07	12542.1	6611.06	4156.54	4445.58
ENSG00000102755	FLT1	3163.42	306.379	25.8614	32.025	53.5897	201.426	124.075	14.2579	10.1482
ENSG00000163565	IFI16	9127.49	3416.13	3103.85	3657.35	3970.06	3813.66	3513.47	7581.43	3880.66
ENSG00000143322	ABL2	2210.64	398.293	1190.58	808.052	828.707	1933.69	4741.38	1045.33	485.083
ENSG00000127951	FGL2	1049.38	551.483	125.476	386.621	583.962	161.141	877.938	327.18	711.049
ENSG00000172216	CEBPB	2164.08	1531.9	167.141	327.212	374.576	751.99	3783.86	93.0513	311.211
ENSG00000107317	PTGDS	49.3415	199.146	0.95783	16.7087	7.18213	308.853	28.2378	2.25124	8.79509
ENSG00000163191	S100A11	4394.87	2251.89	278.25	1494.97	1536.42	751.99	2343.74	721.148	984.373
ENSG00000159167	STC1	4218.35	260.422	0	34.8098	80.6608	0	17.1138	0.750414	4.73582
ENSG00000069849	ATP1B3	1644.25	4350.58	670.96	1159.4	1125.38	4135.94	5893.14	3298.07	1075.71
ENSG00000112245	PTP4A1	4431.7	8256.92	1698.23	2282.6	2918.15	9279.01	7527.51	1046.08	2088.5
ENSG00000123562	MORF4L2	4797.25	4503.77	943.463	955.182	1165.71	8876.16	5480.7	1002.55	1352.41
ENSG00000143321	HDGF	4815.32	4871.43	1407.53	2882.25	2941.91	3531.67	7304.17	4704.34	2681.83
ENSG00000104765	BNIP3L	5802.15	1731.04	823.255	1663.45	1396.09	1732.26	1691.7	1013.06	1317.91
ENSG00000176014	TUBB6	3551.89	566.802	40.2289	167.551	238.668	362.566	637.489	69.0381	54.8002
ENSG00000103187	COTL1	2998.02	11933.5	2553.58	5256.75	3347.42	7721.32	3497.21	3965.19	1715.04
ENSG00000128342	LIF	3717.29	582.12	84.768	368.52	594.459	268.568	13154.5	23.2628	14.2075
ENSG00000122176	FMOD	390.562	76.5948	1.43675	13.4598	3.31483	80.5703	64.1768	169.594	4.73582
ENSG00000164659	KIAA1324L	164.008	183.828	100.093	101.645	81.7657	120.855	179.695	103.557	117.719
ENSG00000148841	ITPRIP	929.15	2588.9	442.997	920.372	580.095	980.272	5098.2	950.024	515.528
ENSG00000116209	TMEM59	2697.8	3783.78	1535.88	2456.18	2908.21	1785.98	2988.93	1707.19	2058.05
ENSG00000130508	PXDN	1779.77	490.207	7.66264	69.6197	131.488	134.284	416.721	22.5124	21.6495
ENSG00000082781	ITGB5	1502.48	352.336	9.5783	134.134	102.76	389.423	1890.22	31.5174	23.6791
ENSG00000159399	HK2	8510.37	459.569	295.012	991.848	819.315	1060.84	1229.63	431.488	202.287
ENSG00000133026	MYH10	327.322	490.207	395.584	154.556	223.198	147.712	340.565	306.919	161.018
ENSG00000141756	FKBP10	228.639	1302.11	6.2259	31.5609	193.917	147.712	1362.26	7.50414	8.11854
ENSG00000111817	DSE	4068.94	1394.03	72.3162	232.994	255.242	2470.82	7345.25	263.395	47.3582
ENSG00000153113	CAST	4383.06	2282.53	3815.52	2633.02	3905.97	3934.52	4959.58	2071.89	3154.05
ENSG00000079819	EPB41L2	517.739	91.9138	161.394	213.5	253.584	1571.12	741.028	891.492	297.68
ENSG00000196419	XRCC6	3813.89	6020.35	3637.36	5927.42	5803.16	4364.23	4234.81	5557.56	4499.03
ENSG00000198408	OGA	8149.69	5591.42	10494	7181.04	7939.01	8271.89	8361.81	5685.88	8746.38
ENSG00000116962	NID1	636.575	183.828	1.43675	25.0631	34.2532	120.855	80.4349	9.00496	12.8544
ENSG00000097033	SH3GLB1	4840.33	1424.66	1640.76	1638.38	2284.47	2094.83	3972.12	2183.7	2119.62
ENSG00000104763	ASAH1	1355.85	1363.39	972.677	966.321	1125.38	2511.11	1295.52	783.432	1240.11
ENSG00000173230	GOLGB1	2385.77	1838.28	1796.41	1269.4	1092.79	4243.37	6490.41	5868.24	3698.67
ENSG00000163902	RPN1	3419.85	3339.53	1164.24	2195.34	2502.69	1826.26	3898.53	1867.03	1804.35
ENSG00000262655	SPON1	667.153	306.379	1046.43	578.771	179.553	375.995	183.973	520.787	1047.29
ENSG00000168374	ARF4	3068.9	5009.3	928.617	1481.97	1935.86	3545.09	2705.69	1264.45	1259.05
ENSG00000186591	UBE2H	2901.42	2175.29	1265.29	1804.08	1940.83	3786.8	4939.9	1609.64	1275.96
ENSG00000136997	MYC	1437.85	2006.78	1692.97	1213.24	762.41	3853.95	4256.2	1014.56	1153.51
ENSG00000119508	NR4A3	785.99	8685.85	156.126	534.679	155.797	2349.97	2468.67	222.122	87.2744
ENSG00000153201	RANBP2	3025.82	5468.87	4179.01	2206.02	2990.53	9413.3	9236.32	5812.7	6587.52
ENSG00000168066	SF1	5463.01	7521.61	10908.7	8088.88	6489.88	14489.2	8479.89	10445	8339.77
ENSG00000206560	ANKRD28	797.804	658.715	1138.38	613.117	960.195	1611.41	1038.81	887.739	648.807
ENSG00000107796	ACTA2	168.178	367.655	202.581	282.192	182.868	80.5703	82.1463	120.817	85.9213
ENSG00000198242	RPL23A	2059.14	7445.01	2472.16	3172.34	2502.69	10057.9	2785.27	3233.53	4689.14
ENSG00000172493	AFF1	5225.34	1731.04	2868.22	2659.47	2072.32	3921.09	5308.7	4851.42	3164.2
ENSG00000197157	SND1	3119.64	1930.19	1489.43	2433.9	1438.08	1329.41	2834.05	1991.6	1289.5
ENSG00000139112	GABARAPL1	2752.01	7153.95	912.333	1996.69	1709.35	4511.94	8259.98	1340.99	2285.37
ENSG00000113013	HSPA9	3731.89	6464.6	3114.86	3283.73	3888.85	10514.4	5873.46	3887.89	3313.72
ENSG00000213719	CLIC1	4911.91	4151.44	1038.77	3164.91	3756.8	2752.82	2649.22	1476.06	1449.16
ENSG00000181222	POLR2A	6763.26	6388.01	7015.63	7607.11	5400.41	13495.5	7945.94	11486.6	11629.8
ENSG00000107263	RAPGEF1	3566.49	2665.5	2986.04	4926.75	4157.9	5344.5	5023.76	6403.28	3428.73
ENSG00000077782	FGFR1	4068.94	1271.47	251.43	629.362	348.057	590.849	5339.51	136.575	322.036
ENSG00000223865	HLA-DPB1	346.086	3354.85	39.271	266.875	1045.83	1248.84	1322.9	1014.56	238.821
ENSG00000153250	RBMS1	4435.87	1302.11	1541.15	889.275	1220.41	1302.55	2618.41	371.455	759.084
ENSG00000203747	FCGR3A	2059.14	796.586	6.2259	202.361	152.482	510.279	822.319	70.5389	10.1482
ENSG00000136238	RAC1	3195.38	3262.94	1219.8	2245	2699.37	2269.4	3557.96	1957.83	1407.21
ENSG00000250722	SELENOP	117.447	183.828	53.1596	25.5272	8.83954	228.283	307.193	11.2562	28.4149
ENSG00000112531	QKI	3757.6	1516.58	1482.24	1598	2099.39	3504.81	5360.05	2308.27	1334.15
ENSG00000221978	CCNL2	5442.16	3615.27	6391.6	4655.24	3816.47	5895.06	8508.99	5729.41	8163.87
ENSG00000169813	HNRNPF	4261.44	4105.48	3498.48	5047.89	4417.56	4955.07	5744.25	6357.51	4727.02
ENSG00000196396	PTPN1	2667.92	2619.54	4277.19	3399.3	3271.18	3343.67	4417.93	2441.85	1499.9
ENSG00000166888	STAT6	6175.33	3446.77	5276.69	6147.42	4168.95	8473.31	3278.15	8601.99	8125.99
ENSG00000112078	KCTD20	2540.05	1899.55	1830.89	2577.32	2660.15	2242.54	5869.18	2258.75	2143.97
ENSG00000119318	RAD23B	4847.28	3446.77	1738.94	2565.72	2723.68	2887.1	3164.34	2492.87	1926.8
ENSG00000153827	TRIP12	6642.34	3400.81	5821.21	4556.84	6546.23	5545.92	6030.91	7994.91	5024.7
ENSG00000154096	THY1	61.1557	122.552	1.43675	29.7044	60.7718	93.9987	29.0935	2.25124	14.884
ENSG00000171867	PRNP	2519.2	6878.21	1320.85	2687.78	3413.17	15120.4	8369.51	769.174	1534.4
ENSG00000144810	COL8A1	1051.46	1623.81	1.91566	35.7381	6.07718	13.4284	44.4959	10.5058	16.2371
ENSG00000189067	LITAF	1731.12	5790.57	1468.83	1894.12	1567.91	3437.67	5824.69	2303.77	1752.93
ENSG00000133030	MPRIP	3535.91	2971.88	6369.57	5613.67	3721.45	1732.26	4539.44	7769.03	6836.49
ENSG00000174705	SH3PXD2B	464.922	137.871	2.87349	62.6577	172.924	26.8568	543.363	21.762	14.884
ENSG00000131873	CHSY1	1574.06	658.715	679.102	918.051	769.04	980.272	1085.02	587.574	420.135
ENSG00000110047	EHD1	4221.83	4074.84	2182.9	4244.48	3823.1	6365.05	13000.5	3968.94	4038.98
ENSG00000169554	ZEB2	1357.93	842.543	68.9638	353.668	359.659	1718.83	3130.97	799.941	120.425
ENSG00000136295	TTYH3	1398.94	781.267	377.864	886.026	565.178	563.992	2816.93	996.549	320.683
ENSG00000074181	NOTCH3	266.861	245.103	0.95783	12.9957	5.52471	13.4284	59.8983	7.50414	14.884
ENSG00000134245	WNT2B	1170.3	413.612	64.1746	91.898	134.251	107.427	3112.15	195.858	31.7976
ENSG00000196628	TCF4	1699.16	137.871	101.051	294.723	54.1422	2846.82	374.792	3418.13	173.196
ENSG00000129116	PALLD	197.366	674.034	15.8042	64.9784	65.7441	214.854	205.366	27.7653	28.4149
ENSG00000137193	PIM1	3870.88	4120.8	12134.8	7091	7164.45	4767.08	6884.89	3154.74	2790.07
ENSG00000196914	ARHGEF12	2655.41	1378.71	924.785	1662.05	2796.06	563.992	2255.6	1806.25	793.588
ENSG00000136244	IL6	2424.68	413.612	9.5783	119.746	160.217	429.708	1058.49	3.75207	8.79509
ENSG00000163527	STT3B	3635.98	2925.92	4641.65	2884.11	4575.01	3464.52	5041.73	2411.83	2846.9
ENSG00000003402	CFLAR	8336.63	4840.79	6758.45	6553.53	6924.12	8325.6	10069.8	12667	4692.52
ENSG00000143248	RGS5	561.52	30.6379	31.6084	21.35	43.0928	214.854	13.691	19.5108	38.5631
ENSG00000111859	NEDD9	1946.56	4519.09	721.725	1432.31	1770.67	1329.41	4523.18	1188.66	584.535
ENSG00000067048	DDX3Y	4437.96	597.439	4090.41	2501.67	3283.89	993.701	11393.5	6649.42	4122.87
ENSG00000114857	NKTR	3972.34	2665.5	10506.9	3758.53	3848.51	4767.08	6628.18	9191.07	9961.45
ENSG00000182158	CREB3L2	2477.5	1424.66	1003.33	1962.81	2847.44	792.275	1561.64	1287.71	1250.93
ENSG00000105323	HNRNPUL1	3963.31	4718.24	4352.86	5296.2	4354.03	4028.52	7498.42	5234.14	4469.94
ENSG00000109436	TBC1D9	997.95	597.439	99.1354	359.237	162.979	2497.68	2727.94	999.551	177.255
ENSG00000198959	TGM2	4878.56	291.06	22.9879	221.855	448.607	214.854	356.823	28.5157	13.5309
ENSG00000180353	HCLS1	3691.58	6893.53	6115.27	7573.69	7944.54	4713.36	4265.62	5698.64	6465.07
ENSG00000100664	EIF5	4985.58	6280.77	3250.88	2391.2	3502.12	26789.6	9181.56	4724.6	6630.14
ENSG00000116690	PRG4	1454.53	3799.1	165.705	142.024	75.6886	134.284	2830.62	115.564	32.4742
ENSG00000146648	EGFR	4248.24	934.457	14.3675	104.43	324.853	375.995	4166.36	12.757	5.41236
ENSG00000088832	FKBP1A	3515.76	3216.98	1075.16	1950.28	2210.44	1691.98	1837.17	1028.82	907.924
ENSG00000119707	RBM25	3756.91	3661.23	6568.32	3472.63	4531.92	7036.47	4619.87	4644.31	5325.77
ENSG00000122545	SEPTIN7	4398.35	3339.53	3878.73	3191.83	4419.22	6109.92	3968.69	4054.49	4073.48
ENSG00000274576	IGHV2-70	104.243	0	0.478915	75.6534	0.552471	0	2.56707	13.5074	0
ENSG00000183087	GAS6	1649.81	398.293	112.066	86.3284	185.63	134.284	1114.96	70.5389	85.2447
ENSG00000108669	CYTH1	4610.31	5468.87	5794.87	6544.71	4683.3	5962.2	8036.65	10208.6	5705.98
ENSG00000071537	SEL1L	3145.35	1041.69	1797.85	1223.91	2044.14	1074.27	1883.37	1688.43	1669.04
ENSG00000129824	RPS4Y1	3369.12	321.698	3810.73	3433.64	3825.86	510.279	3448.43	2495.88	3892.17
ENSG00000124172	ATP5F1E	2004.93	9574.35	1509.54	2988.08	3913.71	5989.06	2271.86	2080.15	2435.56
ENSG00000144028	SNRNP200	6075.96	4764.2	9576.87	10548.8	8956.11	7546.75	9793.38	10228.1	10012.2
ENSG00000126247	CAPNS1	2603.29	4917.39	1323.72	3309.25	2537.5	1195.13	1969.8	1804.75	1753.61
ENSG00000197081	IGF2R	3099.48	1593.17	5227.84	4623.21	3613.71	3598.81	4312.68	4723.1	4624.19
ENSG00000211934	IGHV1-2	90.3436	0	3.35241	42.2359	1.65741	13.4284	24.815	42.0232	10.8247
ENSG00000136068	FLNB	3968.17	888.5	1543.06	2846.05	5556.76	1302.55	3719.69	1499.33	1521.55
ENSG00000126777	KTN1	4095.35	1960.83	3156.05	1751.17	2815.39	4605.94	5359.19	4789.14	3948.32
ENSG00000155506	LARP1	3841.69	2267.21	4423.74	4450.09	3736.92	2940.82	4632.71	5650.62	4036.95
ENSG00000122359	ANXA11	3102.96	4212.71	3468.3	4805.61	3580.01	2108.26	3769.32	3469.16	3231.18
ENSG00000187479	C11orf96	611.557	91.9138	3.83132	49.662	13.8118	67.1419	2641.52	5.2529	9.47164
ENSG00000103257	SLC7A5	1568.5	6939.49	1112.52	2344.33	2458.5	7667.61	15254.4	1187.15	828.092
ENSG00000139926	FRMD6	1363.49	321.698	95.3041	109.071	294.467	241.711	1298.94	54.0298	66.3014
ENSG00000008513	ST3GAL1	2946.59	1286.79	1257.15	1571.08	2355.19	1584.55	6398.85	1277.95	920.102
ENSG00000130300	PLVAP	3223.18	291.06	12.4518	29.2403	5.52471	349.138	29.9492	3.00165	8.11854
ENSG00000135387	CAPRIN1	4323.29	2619.54	2882.11	2888.29	3694.93	3128.81	3323.5	3741.56	3484.89
ENSG00000184840	TMED9	3581.78	2405.08	725.078	1572.48	1725.37	1248.84	3077.92	1216.42	1180.57
ENSG00000011422	PLAUR	3453.91	1608.49	27.7771	232.066	776.222	402.852	3768.46	26.2645	17.5902
ENSG00000087274	ADD1	4531.78	2757.41	4451.52	6528	5661.73	2631.96	4400.82	4268.35	4192.55
ENSG00000155659	VSIG4	189.722	306.379	0.95783	12.5315	67.954	402.852	487.744	2.25124	4.73582
ENSG00000112697	TMEM30A	2365.61	1807.64	2668.99	2573.14	3264	2094.83	2863.14	3018.91	3029.57
ENSG00000117525	F3	7154.52	735.31	2.39458	45.4848	49.1699	26.8568	219.057	13.5074	7.442
ENSG00000114850	SSR3	2644.98	1838.28	1113	1586.4	1767.36	1047.41	2368.55	1361.25	1526.96
ENSG00000104870	FCGRT	642.83	2114.02	153.253	165.231	227.066	577.421	908.743	120.066	151.546
ENSG00000168710	AHCYL1	2824.98	1179.56	1426.21	1858.85	1969.01	1530.84	2597.02	1467.81	1481.63
ENSG00000136826	KLF4	1061.19	4948.02	6.2259	75.1892	96.6825	1651.69	2618.41	16.5091	21.6495
ENSG00000211640	IGLV6-57	71.58	45.9569	0.478915	0.928262	0	13.4284	5.13414	55.5306	0
ENSG00000127483	HP1BP3	5280.24	3370.17	6500.32	6275.52	5147.37	4310.51	5876.88	5435.25	6977.21
ENSG00000024422	EHD2	4526.22	689.353	8.62047	84.4719	206.624	268.568	581.87	12.757	4.05927
ENSG00000177119	ANO6	5079.4	980.413	691.075	923.621	1418.19	1087.7	2791.26	789.435	985.727
ENSG00000138758	SEPTIN11	612.252	796.586	632.647	519.363	913.787	416.28	875.371	791.687	522.293
ENSG00000161921	CXCL16	1890.96	689.353	22.509	287.761	451.921	295.424	1754.17	114.063	39.9162
ENSG00000135506	OS9	2602.59	2236.57	1647.95	2407.91	2362.92	2054.54	3238.79	2594.93	2024.9
ENSG00000146457	WTAP	2231.49	3462.08	1781.56	1507.03	2077.84	4887.93	4636.99	1832.51	2100.67
ENSG00000138069	RAB1A	2818.72	3033.15	948.731	1122.27	1485.04	1893.4	2957.27	1043.83	1101.42
ENSG00000162493	PDPN	2000.76	1761.68	7.66264	57.0881	165.741	510.279	636.634	5.2529	4.05927
ENSG00000079246	XRCC5	4100.21	3967.61	4371.06	4677.05	5577.2	3142.24	2437.86	4691.59	4418.52
ENSG00000076108	BAZ2A	6418.57	2634.86	6268.04	6944.79	4435.24	4283.66	5971.86	13959.9	7335.78
ENSG00000136830	FAM129B	6289.31	965.094	619.237	961.216	1114.89	201.426	3563.95	241.633	238.144
ENSG00000132824	SERINC3	3644.32	4381.22	2598.12	3386.76	3536.92	1678.55	3350.88	3247.79	3399.64
ENSG00000167772	ANGPTL4	5984.22	337.017	3.35241	60.337	49.1699	26.8568	948.961	15.0083	14.2075
ENSG00000170759	KIF5B	4752.08	2297.84	3256.62	2159.6	4300.44	3330.24	4385.41	3729.56	3206.83
ENSG00000183853	KIRREL1	2450.4	260.422	8.62047	103.037	250.822	201.426	1155.18	21.0116	9.47164
ENSG00000260314	MRC1	402.377	291.06	98.6565	171.264	220.436	510.279	721.347	60.7835	142.751
ENSG00000109861	CTSC	2216.89	5943.76	841.454	2885.04	3610.4	859.417	1954.4	914.754	885.598
ENSG00000171858	RPS21	2505.3	8670.53	3319.36	3520.43	3287.76	14193.8	3723.97	3394.87	6017.19
ENSG00000144802	NFKBIZ	6647.9	7690.12	14345.4	5028.4	7858.35	9426.73	7700.36	2506.38	2315.14
ENSG00000162704	ARPC5	3264.19	4151.44	1551.69	2763.9	3555.71	2497.68	1981.78	2474.86	2283.34
ENSG00000198431	TXNRD1	5474.13	2098.7	957.83	1544.16	2130.88	7493.04	6268.79	2257.24	2864.49
ENSG00000182934	SRPRA	3861.15	3247.62	2533.46	3589.59	3266.76	2927.39	3974.68	2332.29	2781.95
ENSG00000277443	MARCKS	2055.67	2343.8	28.7349	270.588	307.174	2390.25	1807.22	741.409	92.6867
ENSG00000082153	BZW1	5672.19	3400.81	1624	2084.88	3399.91	5975.63	4118.44	2024.62	2007.31
ENSG00000162407	PLPP3	1212.69	245.103	11.015	112.784	91.1578	550.564	2549.96	14.2579	17.5902
ENSG00000154175	ABI3BP	1845.79	674.034	17.7199	287.761	92.2627	67.1419	36.7947	30.0165	8.79509
ENSG00000168386	FILIP1L	65.3254	61.2758	20.1144	15.3163	35.3582	147.712	279.811	75.7918	25.7087
ENSG00000106211	HSPB1	2701.97	10922.4	186.777	691.091	700.534	35853.8	8681.84	425.485	477.641
ENSG00000178607	ERN1	3098.79	1930.19	1296.42	1092.1	1406.04	953.415	5622.74	929.012	1433.6
ENSG00000169764	UGP2	8356.79	3201.66	2717.36	2301.63	3525.87	2027.69	3715.41	892.242	1495.17
ENSG00000157106	SMG1	8095.48	2006.78	8357.07	5740.37	6121.38	14341.5	11724.7	12271.5	8950.7
ENSG00000173120	KDM2A	5545.01	6081.63	7576.92	7855.42	6705.34	9104.45	6949.92	9327.64	6987.36
ENSG00000122958	VPS26A	1361.41	1271.47	821.34	686.45	1134.22	1235.41	4427.34	670.87	813.208
ENSG00000140416	TPM1	1009.07	1057.01	243.768	192.614	335.35	295.424	195.097	125.319	165.754
ENSG00000122642	FKBP9	1002.12	1317.43	37.8343	31.5609	59.6669	228.283	1138.92	114.063	39.9162
ENSG00000134247	PTGFRN	425.31	260.422	12.4518	101.181	90.0528	26.8568	274.677	39.7719	9.47164
ENSG00000197324	LRP10	6187.15	3921.65	4346.16	5449.36	4204.31	1517.41	4223.69	5941.03	3588.4
ENSG00000170571	EMB	2754.09	3462.08	5087.52	3300.44	5239.64	1409.98	2306.09	2330.79	3065.43
ENSG00000170004	CHD3	6091.94	5836.52	9909.23	12500.4	7203.67	9453.58	10276.8	14724.6	11013.5
ENSG00000150347	ARID5B	2291.25	3492.72	5661.26	4092.71	4942.96	3894.23	8131.63	5867.49	3429.41
ENSG00000130707	ASS1	1328.05	1256.15	1.43675	10.675	135.908	241.711	3285.85	4.50248	0.676545
ENSG00000123989	CHPF	1478.16	1011.05	132.181	241.812	245.297	349.138	1715.66	133.574	180.638
ENSG00000213639	PPP1CB	4441.43	9451.8	3704.41	3890.81	5020.31	4485.08	5273.62	2611.44	4107.98
ENSG00000145675	PIK3R1	3412.9	2956.56	5570.74	3267.48	3896.03	2591.68	7261.39	4950.48	6987.36
ENSG00000158195	WASF2	4185.69	2435.71	3857.66	5340.29	3597.69	2269.4	3788.14	4585.03	4813.62
ENSG00000097007	ABL1	2198.13	658.715	758.123	946.363	844.729	671.419	2838.33	951.525	603.478
ENSG00000197043	ANXA6	2556.72	8410.11	1905.6	6460.71	4725.29	4109.09	2289.83	7038.13	3420.61
ENSG00000123066	MED13L	2275.27	1302.11	2953.47	2090.91	1852.99	3464.52	2809.23	3226.03	2229.89
ENSG00000144224	UBXN4	4335.1	2297.84	3625.39	2462.68	3779.46	4041.94	4514.62	3930.67	4537.59
ENSG00000165029	ABCA1	2408.7	337.017	80.4578	206.538	445.292	1571.12	2201.69	53.2794	23.0025
ENSG00000108518	PFN1	2943.12	13235.6	2481.74	5564.93	6014.75	5237.07	2977.8	5356.45	2984.92
ENSG00000152558	TMEM123	12427.1	4932.71	13166.8	7595.51	6900.37	7157.33	5135.85	8415.89	10428.3
ENSG00000177697	CD151	2544.91	2711.46	181.03	338.816	390.045	832.56	3112.15	388.714	311.211
ENSG00000076706	AP002956.1	1144.58	903.819	69.4427	169.408	453.579	161.141	880.506	160.589	126.514
ENSG00000130175	PRKCSH	3965.39	3936.97	3213.52	3797.98	3413.72	3625.66	3524.59	2696.24	3336.72
ENSG00000110880	CORO1C	1340.56	1409.34	153.253	662.779	1218.2	2443.97	2311.22	592.827	210.406
ENSG00000183291	SELENOF	3387.89	2941.24	1863.94	2617.7	3245.22	2846.82	2815.22	2738.26	2231.92
ENSG00000159216	RUNX1	4625.59	1746.36	2321.3	3670.35	2877.82	2255.97	7062.87	3695.79	1509.37
ENSG00000111642	CHD4	3581.78	4993.98	3979.79	5648.48	4988.82	7936.18	5275.33	11564.6	5174.22
ENSG00000120705	ETF1	2731.16	3783.78	1303.13	1369.19	1950.22	4552.22	4144.96	1578.12	1378.8
ENSG00000145495	MARCHF6	4205.84	5116.53	7989.26	4191.57	4321.43	6472.48	4523.18	4387.67	5697.19
ENSG00000010610	CD4	3795.82	7843.31	5206.29	10163.5	9151.69	1329.41	2772.44	3550.21	5331.18
ENSG00000153071	DAB2	2991.76	781.267	22.0301	161.053	260.214	402.852	1154.33	54.7802	15.5605
ENSG00000111885	MAN1A1	1947.95	827.224	609.659	1418.85	2287.23	1799.4	2753.61	1024.31	640.012
ENSG00000173918	C1QTNF1	1727.65	229.784	4.78915	65.4425	143.643	80.5703	1636.94	6.00331	8.11854
ENSG00000244038	DDOST	2132.11	2405.08	1419.5	2128.97	2256.29	1329.41	2276.14	1428.79	1669.71
ENSG00000174231	PRPF8	4177.35	2803.37	9167.87	9552.75	7221.9	5545.92	4515.48	8789.6	7742.39
ENSG00000163479	SSR2	2357.27	3554	1847.18	2046.35	1868.46	3236.24	2994.06	1705.69	2455.86
ENSG00000069122	ADGRF5	557.351	122.552	0.478915	6.0337	2.76236	26.8568	8.55691	2.25124	13.5309
ENSG00000086598	TMED2	3740.23	2481.67	1233.21	2026.4	2431.98	2417.11	3975.54	1625.4	1706.92
ENSG00000174348	PODN	123.006	214.465	0	8.81849	4.41977	0	46.2073	3.00165	6.76545
ENSG00000105401	CDC37	3496.99	4595.69	2429.06	2734.66	3294.39	5143.07	4587.36	2723.25	2758.28
ENSG00000124783	SSR1	3122.42	2022.1	2333.75	2144.75	2502.14	966.844	2371.97	1945.07	2218.39
ENSG00000132334	PTPRE	2022.31	735.31	1168.55	823.369	1013.23	859.417	2310.36	2084.65	617.686
ENSG00000134884	ARGLU1	3606.8	4350.58	6515.16	4073.68	4649.05	6861.91	5259.93	4593.28	7009.69
ENSG00000120742	SERP1	2956.32	4090.16	2317.47	2231.54	2400.49	4431.37	5046.01	1737.96	2733.24
ENSG00000124486	USP9X	2406.62	1807.64	4308.8	2825.63	3496.04	5465.35	3551.12	3784.34	4250.06
ENSG00000140319	SRP14	2643.59	5009.3	1441.06	2458.97	3528.63	4377.65	2436.15	1930.81	2301.61
ENSG00000197405	C5AR1	870.079	291.06	43.1024	163.838	283.418	268.568	1676.3	31.5174	18.2667
ENSG00000257923	CUX1	2754.09	1148.92	688.68	627.505	592.249	845.988	3446.72	914.754	449.226
ENSG00000012660	ELOVL5	2368.39	5805.89	2611.52	3064.66	3740.78	10299.6	9002.72	3681.53	2928.76
ENSG00000167986	DDB1	3283.64	2267.21	3272.91	4501.14	3884.43	1879.97	3658.08	3395.62	3170.97
ENSG00000099250	NRP1	2544.22	199.146	18.1988	200.041	340.875	93.9987	302.914	92.3009	16.9136
ENSG00000110958	PTGES3	6185.76	9329.25	3873.47	5548.69	5640.18	23365.4	7050.03	3985.45	5461.07
ENSG00000124193	SRSF6	3692.27	7598.2	5907.42	4959.71	4725.29	11373.8	6605.93	4582.78	5533.46
ENSG00000051523	CYBA	2196.74	5545.46	2099.56	3191.37	3518.14	2000.83	2632.96	3399.37	2264.4
ENSG00000131171	SH3BGRL	1788.11	2527.63	1472.19	1909.44	2738.05	1409.98	1221.07	1333.49	1518.84
ENSG00000132424	PNISR	4361.51	3508.04	8538.58	3854.61	4946.28	9802.72	5089.65	5982.3	8635.42
ENSG00000104517	UBR5	4225.3	1685.09	5319.79	3519.97	5085.5	6929.05	5668.09	7298.52	5117.39
ENSG00000100243	CYB5R3	1937.52	1240.84	867.315	1331.59	1221.51	684.848	1826.9	847.217	936.339
ENSG00000143774	GUK1	3335.07	4779.52	1393.64	1780.41	1755.75	2376.82	3658.93	1620.14	1698.81
ENSG00000163220	S100A9	1840.23	490.207	4.78915	110.927	596.669	1087.7	637.489	5.2529	19.6198
ENSG00000177885	GRB2	3445.57	4258.67	3259.98	4478.4	4183.31	3759.95	2939.3	4043.23	3170.29
ENSG00000133318	RTN3	2000.07	2343.8	600.081	1451.34	1486.7	2376.82	4868.88	1861.78	1316.56
ENSG00000178573	MAF	4111.33	10325	2109.14	5997.04	5718.63	2954.24	8526.1	1437.79	1643.33
ENSG00000117335	CD46	3522.01	2297.84	4877.75	3506.51	4272.81	2511.11	4322.95	3647.01	5708.69
ENSG00000127314	RAP1B	4051.56	3125.07	2097.17	2044.03	2717.61	4471.65	4035.44	2212.97	2397
ENSG00000165527	ARF6	3538.69	4687.6	3492.73	4803.76	4564.52	2887.1	3534	4630.05	3757.53
ENSG00000116489	CAPZA1	4697.87	4932.71	2655.58	3571.95	4882.74	3733.09	3379.12	3749.82	3276.51
ENSG00000198830	HMGN2	2241.22	4304.63	2810.75	3479.59	3662.88	2175.4	2285.55	847.968	3451.06
ENSG00000145012	LPP	2369.78	949.776	1551.21	1017.38	1365.16	1047.41	1814.06	1202.16	282.119
ENSG00000108256	NUFIP2	5281.63	2864.65	3853.35	2851.16	3393.28	21606.3	7070.57	7931.87	6488.75
ENSG00000156515	HK1	3284.34	1822.96	2451.57	3833.26	3583.33	1221.98	3107.01	3187.01	1798.93
ENSG00000064932	SBNO2	7096.84	2190.61	6099.46	5388.1	4536.34	2927.39	5753.66	3749.07	1605.44
ENSG00000167468	GPX4	1742.24	3017.84	827.087	1268.93	1361.84	2054.54	3278.15	1263.7	2242.75
ENSG00000173442	EHBP1L1	4061.29	2864.65	3713.03	3755.28	3664.54	2685.68	3062.52	2964.88	2445.03
ENSG00000079332	SAR1A	3187.05	3599.96	1440.1	1177.96	1509.35	3679.38	4498.37	1371.76	1567.56
ENSG00000095139	ARCN1	3836.82	2343.8	2867.27	3230.35	3257.37	2081.4	3063.37	3173.5	2993.71
ENSG00000205581	HMGN1	2389.24	3783.78	3933.33	3375.63	3410.96	4028.52	3314.95	2414.83	4072.8
ENSG00000118855	MFSD1	709.545	980.413	435.334	552.78	672.91	684.848	1451.25	496.023	491.848
ENSG00000166482	MFAP4	45.1718	229.784	8.62047	25.0631	5.52471	53.7135	35.939	18.0099	12.1778
ENSG00000106948	AKNA	4670.77	5974.39	8774.21	11351.3	7615.26	3088.53	12031.9	11948.1	8014.36
ENSG00000130340	SNX9	1534.45	1960.83	1278.22	1649.99	2276.73	4283.66	3415.06	805.194	1457.96
ENSG00000086061	DNAJA1	6266.37	21232.1	1034.46	1979.06	2868.98	33759	11941.2	4299.12	2629.73
ENSG00000096433	ITPR3	6937.7	1409.34	4213.97	4171.15	2736.94	3249.67	7829.57	5295.67	3833.98
ENSG00000144655	CSRNP1	3315.61	8532.66	2293.05	3060.02	1994.42	6741.05	4677.2	1773.23	1163.66
ENSG00000068366	ACSL4	4535.25	842.543	1050.74	1233.2	3531.95	2430.54	5111.04	1342.49	1175.16
ENSG00000155660	PDIA4	3022.34	2006.78	920.475	1481.51	1877.3	805.703	1888.51	679.124	1184.63
ENSG00000107738	VSIR	1497.62	2466.35	807.93	934.76	787.272	1154.84	2107.57	1283.21	818.62
ENSG00000130723	PRRC2B	4184.3	1853.59	5579.36	5367.21	3252.95	3800.23	4763.63	7743.52	5488.14
ENSG00000100221	JOSD1	2960.49	6173.54	3481.23	4813.04	3626.97	7466.18	8467.91	1808.5	3715.59
ENSG00000253729	PRKDC	3779.84	1654.45	5339.9	3610.01	4191.05	3034.82	2747.62	5808.2	4390.78
ENSG00000158615	PPP1R15B	3747.18	14721.5	2491.8	3362.17	4028.07	9171.59	5486.69	5992.05	4123.54
ENSG00000173334	TRIB1	3449.74	2542.95	236.105	876.744	949.698	2779.68	6596.52	195.858	487.113
ENSG00000177733	HNRNPA0	2017.44	4565.05	2673.78	3026.13	2806	3383.95	3665.78	2905.6	3742.65
ENSG00000153317	ASAP1	2342.68	1179.56	914.728	751.892	678.987	1168.27	3951.58	1052.83	525.676
ENSG00000090621	PABPC4	1995.2	2619.54	2530.59	2009.22	2128.67	5774.21	3485.23	1772.48	2247.48
ENSG00000088882	CPXM1	111.192	0	3.83132	14.8522	55.7996	40.2852	37.6504	10.5058	4.73582
ENSG00000132341	RAN	5581.85	6020.35	2024.37	3051.66	3527.53	5827.92	4638.7	3027.92	3024.16
ENSG00000169756	LIMS1	2476.81	1623.81	935.321	1746.99	2318.72	1409.98	3397.09	2148.43	1258.37
ENSG00000179222	MAGED1	1956.98	2297.84	565.12	669.277	624.293	268.568	672.573	517.035	443.814
ENSG00000124107	SLPI	2046.63	1715.72	0	7.89023	22.6513	3316.81	4085.92	1.50083	12.1778
ENSG00000049540	ELN	17.3738	107.233	5.74698	27.3837	16.0217	26.8568	22.248	6.75372	5.41236
ENSG00000076928	ARHGEF1	6042.6	10585.4	13756.4	12991	9314.11	7989.89	9181.56	12871.1	13451.8
ENSG00000128245	YWHAH	2105.7	2527.63	761.475	2186.99	1609.9	1732.26	3079.63	1381.51	1548.61
ENSG00000054654	SYNE2	6556.17	3615.27	14267.8	13141.4	6549.55	2725.96	17629.8	26291.5	20115.7
ENSG00000005483	KMT2E	3465.03	3538.68	4833.21	3291.15	3671.72	6942.48	5787.89	4631.55	4775.73
ENSG00000131504	DIAPH1	5845.23	5468.87	5787.21	8747.48	7843.43	4713.36	7740.58	6496.33	5392.07
ENSG00000136240	KDELR2	2410.79	1991.46	569.909	872.102	967.377	1356.27	2637.24	454	604.155
ENSG00000170248	PDCD6IP	3681.16	2297.84	3365.82	2359.64	2947.99	2188.83	3040.27	3075.2	3377.31
ENSG00000104805	NUCB1	2093.89	2711.46	1962.12	2105.76	1782.82	2148.54	1695.98	1079.85	1340.24
ENSG00000135926	TMBIM1	3791.65	2037.42	782.547	1873.23	1582.28	1906.83	3412.49	1773.23	1901.09
ENSG00000055483	USP36	2391.33	4519.09	2549.27	2217.15	1429.8	4162.8	5127.3	1847.52	2654.76
ENSG00000163041	H3F3A	2060.53	4228.03	1848.61	2487.74	3302.67	5062.5	2341.17	1799.49	2091.88
ENSG00000005893	LAMP2	2587.3	1455.3	1135.99	1420.24	1892.21	1087.7	2055.37	988.295	1270.55
ENSG00000038382	TRIO	3977.9	520.845	319.436	579.7	448.054	4028.52	2952.13	3656.02	487.113
ENSG00000138757	G3BP2	4775.01	11213.5	5732.14	4257.01	5070.03	6418.77	4599.34	3135.98	4016.65
ENSG00000108424	KPNB1	7519.37	2803.37	3996.55	3877.82	3671.17	3128.81	3162.63	6217.18	4198.64
ENSG00000157933	SKI	1969.49	1654.45	3868.68	2896.64	2280.6	2954.24	5560.28	1661.42	1982.95
ENSG00000135316	SYNCRIP	3799.99	2849.33	3581.33	3328.28	3702.66	3813.66	2789.55	3257.55	2832.02
ENSG00000115875	SRSF7	3583.86	11198.2	4362.44	4432.92	5391.01	18088	8422.56	3004.66	7476.5
ENSG00000155090	KLF10	1911.12	3599.96	234.19	739.825	610.481	9963.86	2542.26	351.194	338.273
ENSG00000205339	IPO7	2581.74	1179.56	2078.97	1120.88	2092.76	3639.09	4119.29	2329.28	2314.46
ENSG00000082397	EPB41L3	2393.41	245.103	15.8042	230.209	422.088	93.9987	997.735	52.529	6.76545
ENSG00000099331	MYO9B	4402.51	2420.4	4522.4	5157.42	4295.46	6499.34	8510.7	7510.14	2823.9
ENSG00000168214	RBPJ	2460.82	3109.75	1490.38	1574.8	3665.09	2309.68	3468.11	2134.18	1369.33
ENSG00000115935	WIPF1	8016.96	10600.7	7666	12923.7	11421.8	6163.63	8508.99	12350.3	10506.1
ENSG00000196352	CD55	2601.9	2451.03	1367.78	685.058	836.441	4028.52	3707.71	690.381	1618.97
ENSG00000101347	SAMHD1	7499.91	2420.4	5404.08	4753.17	4737.99	1060.84	1426.44	4380.92	4014.62
ENSG00000170315	UBB	2483.06	11228.8	1112.04	2440.4	2903.79	26816.5	4015.76	2252.74	1985.66
ENSG00000140943	MBTPS1	2002.85	1777	3838.98	3137.99	2435.29	1396.55	2998.34	2775.78	3505.18
ENSG00000184371	CSF1	5917.51	4503.77	996.623	3392.33	3846.3	2605.11	6254.24	603.333	312.564
ENSG00000108828	VAT1	1791.58	1485.94	807.451	1152.44	697.219	550.564	1527.41	1366.5	1135.24
ENSG00000100647	SUSD6	2470.55	2588.9	2910.85	3710.26	2651.31	2443.97	3407.36	2889.84	1513.43
ENSG00000170581	STAT2	18736.6	2788.05	2792.08	4894.26	2955.72	3061.67	3382.54	5454.76	3043.78
ENSG00000013364	MVP	4615.86	4427.18	2902.23	5233.54	5141.3	1047.41	3243.92	3237.28	2190.65
ENSG00000064393	HIPK2	2856.25	765.948	1172.38	1009.02	883.954	1409.98	1988.62	3236.53	1021.58
ENSG00000134686	PHC2	2573.4	965.094	563.204	796.913	781.194	496.85	1397.34	535.045	678.575
ENSG00000105339	DENND3	1188.37	750.629	656.593	873.495	955.223	3598.81	1923.59	541.799	277.384
ENSG00000198961	PJA2	4098.13	1899.55	3519.07	2549.94	3298.25	2537.96	1999.75	2622.7	3334.02
ENSG00000162772	ATF3	2633.86	8716.49	10.0572	105.358	202.757	5371.35	1401.62	64.5356	146.81
ENSG00000057608	GDI2	3292.68	3569.32	2409.9	3504.65	3722	6700.76	2456.69	3339.34	3840.75
ENSG00000162923	WDR26	4806.98	4350.58	4842.79	4657.56	4757.33	13200.1	7048.32	6292.97	5557.14
ENSG00000022267	FHL1	235.588	352.336	390.795	145.273	75.1361	402.852	1168.02	240.883	452.609
ENSG00000132470	ITGB4	3660.31	1179.56	12.4518	43.1642	55.7996	255.139	2452.41	11.2562	5.41236
ENSG00000004799	PDK4	644.22	153.19	0.95783	38.5229	93.3676	281.996	247.295	46.5257	16.2371
ENSG00000197965	MPZL1	3744.4	689.353	258.614	326.284	405.514	1087.7	1504.3	277.653	177.931
ENSG00000141526	SLC16A3	5495.67	1057.01	319.436	888.811	874.562	563.992	1856.85	443.495	264.529
ENSG00000180370	PAK2	4239.9	3691.87	6193.33	6236.53	8001.99	2645.39	4996.38	4252.59	4637.04
ENSG00000125107	CNOT1	4096.74	1378.71	5263.76	4225.45	4307.07	4699.94	5966.73	9097.27	5726.96
ENSG00000029363	BCLAF1	3021.65	3569.32	5371.99	2625.59	3396.59	9158.16	5028.04	5589.83	6054.4
ENSG00000002834	LASP1	5044.65	4105.48	2805.96	6334.46	5403.72	5384.78	5769.92	5009.76	3526.83
ENSG00000101608	MYL12A	3530.35	4365.9	1777.73	2785.71	3294.94	1584.55	1256.15	2381.06	2491.04
ENSG00000181143	MUC16	2063.31	260.422	0.95783	59.4088	116.571	67.1419	3650.38	37.5207	10.1482
ENSG00000196235	SUPT5H	4775.7	4779.52	4713	5591.85	5039.09	6996.19	7596.82	6894.8	4694.55
ENSG00000162889	MAPKAPK2	2502.52	4028.89	1642.68	3090.65	3538.03	4793.93	5929.94	2766.03	2070.23
ENSG00000138356	AOX1	27.798	0	0.95783	1.85652	9.39201	0	991.745	1.50083	1.35309
ENSG00000110324	IL10RA	4825.74	6510.56	10973.4	15352.1	11216.3	3679.38	10887.8	9504.74	9836.97
ENSG00000135127	BICDL1	2635.25	2925.92	3526.25	5966.41	3196.05	5237.07	24592.5	3039.93	5927.89
ENSG00000141959	PFKL	4736.79	2573.59	2800.7	4180.43	3108.2	1597.98	2971.81	2718.75	3259.6
ENSG00000138722	MMRN1	2.7798	0	13.4096	4.17718	22.6513	0	33.3719	5.2529	6.08891
ENSG00000143162	CREG1	1845.79	1332.75	279.208	573.666	833.127	443.137	1071.32	224.374	361.952
ENSG00000082438	COBLL1	3685.33	1853.59	33.0451	100.716	16.0217	1920.26	1883.37	2526.64	92.0102
ENSG00000099204	ABLIM1	2202.99	1439.98	4472.11	3894.06	1652.44	6499.34	3408.22	3799.34	4400.25
ENSG00000141522	ARHGDIA	3018.17	2834.01	2184.81	3575.2	3257.37	2121.68	3557.96	2958.88	2474.8
ENSG00000159335	PTMS	1736.68	3385.49	24.9036	261.306	292.81	617.706	2327.48	701.637	43.2989
ENSG00000049239	H6PD	2081.38	765.948	2022.94	1737.71	1097.21	537.135	1528.26	894.493	906.571
ENSG00000198355	PIM3	1948.64	6510.56	1029.19	2158.21	2027.57	4028.52	3996.93	1721.45	1621.68
ENSG00000027697	IFNGR1	1158.48	1225.52	671.439	659.53	910.473	2457.39	1672.02	765.422	624.451
ENSG00000019144	PHLDB1	949.303	582.12	129.307	119.746	59.6669	228.283	860.825	155.336	164.401
ENSG00000184432	COPB2	3085.58	1777	1338.09	1717.75	2119.83	1114.56	2098.15	2038.87	1753.61
ENSG00000145730	PAM	2654.71	1562.53	722.204	1465.26	931.467	483.422	786.38	476.513	1024.29
ENSG00000108848	LUC7L3	3934.12	3477.4	6654.05	2935.17	4031.94	5344.5	3920.77	5659.62	7561.75
ENSG00000006125	AP2B1	3519.93	2665.5	4213.02	5777.04	5079.42	1718.83	4922.79	2964.13	4687.78
ENSG00000147677	EIF3H	2297.51	3768.46	3380.18	2788.04	3219.8	6526.2	3016.31	2230.98	4149.93
ENSG00000131724	IL13RA1	1527.5	566.802	12.4518	72.4045	176.238	631.134	477.475	466.007	48.0347
ENSG00000164932	CTHRC1	82.6992	91.9138	3.83132	14.8522	12.1544	107.427	44.4959	9.75538	16.2371
ENSG00000273749	CYFIP1	2299.59	934.457	177.678	493.836	856.883	362.566	1470.08	298.665	211.759
ENSG00000125304	TM9SF2	4185	2665.5	2748.49	3429.93	4581.64	1973.97	3136.11	2551.41	2253.57
ENSG00000049449	RCN1	1904.17	903.819	78.5421	151.307	391.15	416.28	1178.29	55.5306	44.652
ENSG00000130775	THEMIS2	761.666	643.396	719.331	819.191	493.357	429.708	464.64	770.675	458.698
ENSG00000233276	GPX1	2023.7	2726.77	320.873	989.528	1406.04	1409.98	1336.59	964.282	587.918
ENSG00000163347	CLDN1	123.701	45.9569	15.8042	24.5989	124.859	228.283	1542.81	1.50083	3.38273
ENSG00000111716	LDHB	2745.06	7981.18	5479.27	5173.67	5733.55	6700.76	2492.63	7563.42	9152.31
ENSG00000118689	FOXO3	991.695	750.629	963.098	697.125	747.494	926.559	1668.6	563.561	749.612
ENSG00000147649	MTDH	3889.64	1623.81	3500.39	2657.15	3635.81	3491.38	4078.22	3019.66	2964.62
ENSG00000112308	C6orf62	6508.22	3569.32	5163.18	4822.79	4737.99	5398.21	5805	5042.78	6481.98
ENSG00000010818	HIVEP2	3223.88	1179.56	5318.83	3684.74	2228.12	3585.38	7992.15	7377.32	5737.1
ENSG00000196526	AFAP1	2270.41	674.034	1692.97	530.966	839.756	456.565	2160.62	98.3042	207.023
ENSG00000197879	MYO1C	2377.43	2496.99	497.114	1187.71	1151.9	1584.55	1535.11	1324.48	598.066
ENSG00000100280	AP1B1	1038.95	1225.52	1164.72	1593.83	1327.04	1289.13	1417.02	1957.08	1108.86
ENSG00000182220	ATP6AP2	1941.69	2496.99	1377.84	1945.64	2017.63	1127.98	2110.13	1045.33	1853.06
ENSG00000092964	DPYSL2	1123.74	1409.34	133.138	561.599	1248.59	416.28	705.945	405.974	306.475
ENSG00000105887	MTPN	3664.48	2496.99	2117.76	2780.61	2846.88	4243.37	3684.6	2565.66	2338.14
ENSG00000010278	CD9	2250.25	1363.39	44.0602	185.188	249.165	711.704	1884.23	151.584	77.8027
ENSG00000120690	ELF1	3943.15	3952.29	3363.9	2911.49	3100.47	4229.94	3768.46	6506.84	6379.15
ENSG00000112902	SEMA5A	400.292	796.586	0.95783	16.2446	34.8057	53.7135	1723.36	5.2529	4.05927
ENSG00000109320	NFKB1	2718.65	3599.96	2001.39	2561.08	2223.7	12421.3	10469.4	2597.93	1453.9
ENSG00000115415	STAT1	24515.8	5055.26	5204.37	8449.97	5917.52	1584.55	1062.77	10192.9	2152.09
ENSG00000145907	G3BP1	4004.31	2757.41	4043	3501.87	4391.59	10769.6	5242.82	3870.63	4082.27
ENSG00000176915	ANKLE2	4394.87	1914.87	2630.68	3132.89	2877.82	9332.73	9227.77	4272.86	3129.02
ENSG00000163346	PBXIP1	6340.04	14246.6	9736.35	15342.8	12540.5	7694.47	15389.6	11632.2	15456.4
ENSG00000168003	SLC3A2	2868.06	5422.91	1915.18	3010.35	2885	8809.02	6636.74	2144.68	5147.83
ENSG00000137409	MTCH1	3221.1	3630.59	2260.48	2175.85	2284.47	8057.03	4504.35	2285.01	2129.76
ENSG00000173517	PEAK1	2078.6	260.422	223.653	281.728	309.384	1141.41	2053.66	993.548	488.466
ENSG00000088448	ANKRD10	3879.22	2114.02	3136.89	2590.32	4648.49	6297.91	12738.7	2859.08	2836.08
ENSG00000075618	FSCN1	1193.23	1011.05	40.2289	161.053	164.636	698.276	1336.59	138.827	17.5902
ENSG00000131143	COX4I1	2107.79	5223.77	2248.51	2934.7	3994.92	5760.78	3379.12	2091.4	3513.98
ENSG00000197622	CDC42SE1	3664.48	3492.72	5139.72	6172.48	4535.24	2349.97	5064.83	4594.78	6625.41
ENSG00000147274	RBMX	3553.28	5009.3	4863.86	3888.03	4246.85	6163.63	2627.83	3959.18	5220.22
ENSG00000100813	ACIN1	5250.36	2941.24	6380.11	6263.91	4860.64	5411.64	6564.86	8460.16	6452.21
ENSG00000065526	SPEN	3394.84	1593.17	5586.55	3617.44	2599.93	5975.63	9325.32	9654.82	4525.41
ENSG00000137497	NUMA1	4399.74	2573.59	7890.13	7263.65	5526.37	2161.97	4429.05	6466.32	6737.72
ENSG00000132002	DNAJB1	2953.54	70053.6	1419.03	2357.79	2303.81	173804	20746.2	1816	2636.5
ENSG00000101596	SMCHD1	13101.9	3385.49	13678.3	8153.86	8648.94	19712.9	11267.7	13960.7	16215.4
ENSG00000167202	TBC1D2B	1754.75	1439.98	2631.64	2777.36	2067.35	872.845	3998.64	6663.67	2600.64
ENSG00000116260	QSOX1	6184.37	1531.9	635.042	1027.12	1339.19	738.561	2763.88	658.113	623.098
ENSG00000158470	B4GALT5	2312.1	1072.33	628.816	1012.27	1772.88	1289.13	4458.15	775.177	343.008
ENSG00000160551	TAOK1	4209.32	1363.39	3565.52	2103.44	2725.34	3222.81	4324.66	4209.07	3111.43
ENSG00000155096	AZIN1	2620.66	3891.02	2423.31	2472.89	3250.19	20666.3	3132.68	1610.39	2938.91
ENSG00000181789	COPG1	2918.79	1194.88	1362.51	2054.24	2064.03	631.134	2069.06	1413.78	1658.21
ENSG00000144674	GOLGA4	2450.4	643.396	1323.24	694.34	778.432	1826.26	3617	3280.81	2033.02
ENSG00000187446	CHP1	2212.72	3661.23	485.62	1002.52	927.599	1396.55	3464.69	665.617	601.449
ENSG00000078808	SDF4	2784.67	2650.18	1964.51	2478	3066.22	2470.82	4519.76	2566.42	2291.46
ENSG00000106991	ENG	3845.86	520.845	450.18	477.591	328.72	281.996	962.652	270.899	227.996
ENSG00000105223	PLD3	1761.01	1639.13	829.96	1254.55	1213.23	214.854	818.04	829.207	898.452
ENSG00000111341	MGP	91.7335	2328.48	15.3253	23.6707	4.97224	268.568	53.0528	17.2595	14.884
ENSG00000187079	TEAD1	2360.75	505.526	16.762	27.8479	120.439	120.855	1550.51	21.0116	27.7384
ENSG00000110367	DDX6	4543.59	4473.14	7185.16	5726.91	7048.43	3410.81	5512.36	6696.69	7858.75
ENSG00000140526	ABHD2	1676.22	1118.28	2470.24	2359.64	1943.04	953.415	1535.11	1093.35	1499.9
ENSG00000020577	SAMD4A	908.996	229.784	72.7951	85.4001	152.482	1087.7	1427.29	236.38	25.0322
ENSG00000073849	ST6GAL1	2565.06	1608.49	4429.01	3707.02	1922.6	2766.25	1091.01	3848.12	2679.8
ENSG00000144824	PHLDB2	1077.17	551.483	50.2861	48.7338	117.124	335.71	4162.08	84.7968	44.652
ENSG00000109814	UGDH	1396.16	229.784	178.635	381.98	245.297	510.279	1892.79	365.451	370.07
ENSG00000084636	COL16A1	193.196	76.5948	3.35241	27.3837	36.4631	80.5703	103.539	6.00331	12.1778
ENSG00000174807	CD248	9.72931	168.509	3.83132	4.64131	2.20989	13.4284	12.8354	3.75207	4.73582
ENSG00000184014	DENND5A	2150.87	520.845	431.982	448.815	687.827	3021.39	2343.74	889.991	205.67
ENSG00000130309	COLGALT1	3184.27	1501.26	1621.61	1756.27	1532.56	1544.26	2714.25	2309.02	1959.28
ENSG00000197226	TBC1D9B	3604.02	1409.34	2498.98	2745.8	1695.53	845.988	2297.53	1767.97	1980.25
ENSG00000160271	RALGDS	3301.02	3860.38	4313.11	6034.63	4583.3	2967.67	7496.7	4248.84	5307.5
ENSG00000113719	ERGIC1	1870.11	1485.94	1013.86	1519.1	1315.99	1490.55	1611.27	1100.86	819.296
ENSG00000180398	MCFD2	3408.04	903.819	796.915	877.672	1040.86	1315.98	2258.17	1467.81	970.166
ENSG00000099783	HNRNPM	3932.73	5024.62	3679.51	4407.85	4149.06	6915.62	4321.24	3668.02	3269.74
ENSG00000175166	PSMD2	3680.46	2696.14	1809.82	2841.87	3052.96	2484.25	3993.51	2910.1	2382.12
ENSG00000124201	ZNFX1	9091.35	1960.83	2477.91	3582.16	2363.47	2067.97	3867.72	4493.48	3052.57
ENSG00000087365	SF3B2	3784.01	3232.3	3365.82	4646.88	4350.71	5948.77	5055.42	5102.06	4503.76
ENSG00000179295	PTPN11	2482.37	1271.47	1783.48	1623.53	2278.94	2242.54	2383.1	2277.51	1820.58
ENSG00000061676	NCKAP1	2813.16	857.862	162.352	129.493	368.498	375.995	1458.95	78.043	198.228
ENSG00000008952	SEC62	3332.29	1868.91	1753.79	1184.46	1665.7	2940.82	2646.65	2652.71	2520.81
ENSG00000108175	ZMIZ1	1594.22	1164.24	236.584	977.46	1486.15	1785.98	2720.24	1057.33	627.158
ENSG00000168477	TNXB	751.937	183.828	90.9939	96.5393	75.1361	134.284	611.819	73.5405	112.983
ENSG00000111252	SH2B3	1387.12	1485.94	1005.24	879.528	727.605	3679.38	1706.25	917.006	577.093
ENSG00000109111	SUPT6H	3935.51	2466.35	3817.91	3870.85	3128.64	3048.24	3769.32	5664.87	3403.7
ENSG00000108953	YWHAE	2152.26	1669.77	724.12	1325.56	2138.62	1315.98	1617.26	832.959	938.368
ENSG00000047410	TPR	3199.55	1639.13	5808.28	3076.26	3593.83	3222.81	3964.41	5598.09	6494.16
ENSG00000058673	ZC3H11A	4779.87	2083.38	5088	3686.59	4411.48	7976.46	6941.36	8101.47	5993.52
ENSG00000118257	NRP2	733.868	137.871	19.1566	167.551	409.381	443.137	932.703	167.342	14.2075
ENSG00000114019	AMOTL2	2501.13	903.819	1.43675	33.4174	258.557	349.138	1316.05	14.2579	6.76545
ENSG00000103335	PIEZO1	5223.25	2634.86	2495.15	4626.92	3842.99	2014.26	7556.6	9690.84	2586.43
ENSG00000130600	H19	134.821	965.094	1.91566	8.35436	66.2966	161.141	7.70121	2.25124	2.70618
ENSG00000132274	TRIM22	15995.7	5453.55	9527.54	9096.04	7686.53	4256.8	3283.28	6883.55	5846.71
ENSG00000111676	ATN1	3230.13	1531.9	1680.03	1864.41	1229.8	2161.97	2783.56	3459.41	1359.86
ENSG00000128918	ALDH1A2	1114.7	3630.59	13.4096	77.0458	128.726	939.987	5384	19.5108	8.79509
ENSG00000148926	ADM	3940.37	398.293	3.35241	39.4511	83.4232	469.994	495.445	35.2694	10.8247
ENSG00000077157	PPP1R12B	535.112	352.336	733.219	761.639	668.49	268.568	453.516	961.28	646.101
ENSG00000203875	SNHG5	1218.25	5729.29	1578.03	688.306	566.283	12958.4	3161.78	1643.41	4700.64
ENSG00000100353	EIF3D	2480.98	3278.26	2644.09	3409.51	3293.83	4820.79	2729.65	2415.58	4371.16
ENSG00000196776	CD47	5344.87	2542.95	6407.41	3857.86	3007.65	2981.1	2973.52	3783.59	4718.9
ENSG00000080503	SMARCA2	2570.62	3722.51	5290.58	3702.37	3001.02	4122.51	2736.5	3025.67	3432.79
ENSG00000163349	HIPK1	2212.03	4595.69	3307.87	2913.35	2605.45	6485.91	5463.58	5121.57	3708.82
ENSG00000150961	SEC24D	2401.75	827.224	425.756	640.501	731.472	886.273	2123.82	705.389	395.779
ENSG00000160209	PDXK	2532.4	1822.96	1413.76	1328.34	1095.55	3934.52	4546.28	975.538	1484.34
ENSG00000120899	PTK2B	3490.74	3094.43	2165.18	3582.63	2455.73	4028.52	5840.94	3983.2	1945.74
ENSG00000077238	IL4R	3146.74	2834.01	5744.11	4806.08	5562.28	2860.25	4508.63	1710.19	1616.27
ENSG00000128989	ARPP19	3099.48	3370.17	2807.88	3767.82	4254.03	4417.94	4941.61	4444.7	3421.29
ENSG00000198231	DDX42	2597.03	1914.87	3737.45	2652.51	2438.06	2296.25	2752.76	3115.72	3171.64
ENSG00000140941	MAP1LC3B	2128.64	4473.14	1161.85	1777.62	1814.87	8809.02	3996.93	1794.24	2250.87
ENSG00000140564	FURIN	2196.05	3201.66	2534.9	3128.24	8984.29	1638.26	4919.36	3076.7	1386.92
ENSG00000018408	WWTR1	1897.22	367.655	34.003	89.1132	214.359	161.141	378.215	56.281	41.2693
ENSG00000162733	DDR2	817.262	428.931	25.3825	33.8816	40.8829	228.283	207.077	60.7835	35.8569
ENSG00000143226	FCGR2A	1316.24	367.655	11.494	85.4001	133.698	1154.84	1800.37	17.2595	12.1778
ENSG00000112562	SMOC2	65.3254	566.802	3.35241	12.9957	48.6175	80.5703	11.9797	3.00165	7.442
ENSG00000115419	GLS	5722.23	5269.72	4775.26	3984.1	4754.57	11696.1	6923.39	5202.62	5458.37
ENSG00000137845	ADAM10	5096.77	2941.24	3510.45	2436.69	3613.71	2027.69	3627.27	3562.21	3640.49
ENSG00000173726	TOMM20	2638.03	3201.66	2344.29	2098.8	2357.39	3598.81	2008.31	1713.19	2815.11
ENSG00000101558	VAPA	2514.33	2144.65	1825.62	1856.06	2159.06	3343.67	2393.37	1467.81	1775.26
ENSG00000105993	DNAJB6	3604.71	8226.28	2546.39	2419.98	2347.45	21861.4	11010.2	2745.01	2344.23
ENSG00000124126	PREX1	2934.08	4549.73	4401.71	7996.05	7747.3	6714.19	7994.72	7769.03	4629.6
ENSG00000127528	KLF2	1877.76	6265.45	1945.35	2176.77	641.419	3034.82	3159.21	2579.17	4370.48
ENSG00000132205	EMILIN2	705.375	490.207	127.391	214.429	348.609	751.99	1035.39	430.737	147.487
ENSG00000167615	LENG8	3059.87	1057.01	6557.79	3967.39	2919.81	1718.83	3596.47	3397.87	5002.38
ENSG00000022840	RNF10	2623.44	3140.39	2210.19	3150.99	2761.25	4753.65	4352.04	2456.85	2817.13
ENSG00000130779	CLIP1	3186.35	1133.6	2622.06	2028.25	3314.83	2027.69	4121.01	2095.16	2260.34
ENSG00000162576	MXRA8	146.635	597.439	59.3855	31.5609	17.1266	161.141	154.024	132.823	42.6224
ENSG00000117592	PRDX6	2924.35	4519.09	1196.81	1461.55	1615.43	2967.67	1866.26	1223.17	1247.55
ENSG00000121579	NAA50	2872.93	3814.42	1950.62	2260.32	2980.58	6391.91	6763.38	4156.54	3077.6
ENSG00000144476	ACKR3	1176.55	474.888	112.545	95.1469	200.547	255.139	445.815	16.5091	60.8891
ENSG00000081320	STK17B	6679.87	12653.5	20341.9	8894.14	15095.7	12233.3	5761.36	4883.69	6025.99
ENSG00000090060	PAPOLA	4667.29	3293.58	4539.16	3361.7	4988.82	5666.78	4823.53	4875.44	4947.58
ENSG00000050820	BCAR1	1591.44	582.12	23.9458	25.9913	64.6391	295.424	1803.8	18.0099	10.1482
ENSG00000164828	SUN1	2316.97	1516.58	3187.66	2507.24	1717.63	3195.96	3112.15	2615.94	7597.6
ENSG00000213585	VDAC1	3774.28	3140.39	993.27	1954.46	2334.19	1624.83	2586.75	1297.47	970.166
ENSG00000109686	SH3D19	202.231	30.6379	16.2831	31.5609	24.8612	550.564	120.652	24.0132	14.2075
ENSG00000159200	RCAN1	1478.16	551.483	105.361	249.238	273.473	926.559	328.585	183.851	135.986
ENSG00000101421	CHMP4B	2422.6	2696.14	947.294	1738.64	1770.67	4283.66	3579.35	1423.53	1143.36
ENSG00000147454	SLC25A37	5476.91	1225.52	1367.3	968.642	1383.39	1289.13	6862.64	267.147	878.832
ENSG00000079805	DNM2	4353.17	3492.72	4885.41	5306.88	5362.29	3075.1	4924.5	5275.41	3035.66
ENSG00000196683	TOMM7	1291.22	3967.61	1646.99	1844.46	1518.74	4417.94	1691.7	1439.29	3467.29
ENSG00000054118	THRAP3	4051.56	2114.02	3781.51	4511.82	3806.53	5357.93	4141.54	4126.53	4276.44
ENSG00000136026	CKAP4	3107.82	658.715	139.843	208.859	220.989	819.132	853.979	183.101	206.346
ENSG00000168137	SETD5	3082.8	1531.9	3839.94	2874.36	2171.76	4995.36	5009.21	3416.63	3294.1
ENSG00000185022	MAFF	1496.23	1700.4	136.97	162.91	167.951	792.275	3363.72	60.7835	129.897
ENSG00000135218	CD36	76.4446	413.612	0.478915	15.3163	14.3643	93.9987	23.1036	61.5339	5.41236
ENSG00000131196	NFATC1	1041.73	1256.15	1447.28	1214.17	785.062	2403.68	3075.35	1298.97	1290.85
ENSG00000147251	DOCK11	1619.24	3125.07	3012.86	1996.23	2857.93	2712.53	2759.6	4089.75	3639.14
ENSG00000106153	CHCHD2	2831.23	4948.02	980.818	1998.08	2444.13	2739.39	2480.65	1383.76	1625.74
ENSG00000197329	PELI1	1264.12	5024.62	2848.11	1723.32	2419.82	13683.5	4007.2	2142.43	2325.96
ENSG00000115738	ID2	2369.78	4350.58	106.798	455.313	830.917	3773.38	3408.22	275.402	623.775
ENSG00000188257	PLA2G2A	1461.48	919.138	2.39458	19.0294	23.2038	3007.96	335.431	1.50083	3.38273
ENSG00000140105	WARS	8687.58	1072.33	688.201	1273.11	1829.78	1007.13	1227.92	3256.05	385.631
ENSG00000147416	ATP6V1B2	2106.4	1516.58	1135.99	1951.21	2310.99	2229.11	3490.36	1076.84	1591.91
ENSG00000184254	ALDH1A3	1052.85	76.5948	26.8193	30.6327	476.23	40.2852	2071.63	5.2529	6.08891
ENSG00000083312	TNPO1	4216.27	1685.09	3767.63	2106.69	2707.66	4901.36	2615.85	3519.44	3661.46
ENSG00000164056	SPRY1	649.084	980.413	228.921	93.7545	23.7563	187.997	212.211	42.7736	125.837
ENSG00000138767	CNOT6L	3428.19	7690.12	5526.2	4509.5	5205.38	6485.91	9972.22	2554.41	5933.3
ENSG00000167470	MIDN	2886.13	3339.53	1581.86	1804.08	1282.84	4834.22	2905.07	999.551	989.786
ENSG00000180817	PPA1	2224.54	1685.09	1008.6	773.707	1813.76	1785.98	2734.79	630.348	731.346
ENSG00000211445	GPX3	396.122	214.465	38.3132	112.784	95.0251	201.426	213.923	174.096	54.1236
ENSG00000134853	PDGFRA	293.964	30.6379	3.83132	13.4598	6.62966	80.5703	13.691	9.75538	4.73582
ENSG00000012171	SEMA3B	859.654	827.224	15.8042	19.4935	21.5464	510.279	3735.94	68.2877	8.79509
ENSG00000166272	WBP1L	1729.73	765.948	850.074	1300.5	1267.37	402.852	934.414	1124.87	1033.76
ENSG00000103342	GSPT1	3057.09	5698.65	3542.54	3213.64	3350.19	4444.8	5581.67	2782.53	3273.13
ENSG00000160014	CALM3	2348.24	4258.67	2699.17	3815.16	3656.81	1383.12	1689.99	2650.46	2577.64
ENSG00000255302	EID1	1879.84	2068.06	1807.9	2218.08	2640.81	1289.13	1098.71	1256.94	1927.48
ENSG00000109606	DHX15	4260.74	2451.03	4109.57	2678.96	3348.53	4377.65	4532.59	3748.32	3533.6
ENSG00000143569	UBAP2L	3440.01	1868.91	3006.15	2990.4	2708.21	2739.39	2732.22	3579.47	3020.78
ENSG00000145860	RNF145	3043.89	3033.15	3325.59	3037.74	3417.59	4162.8	7009.82	2446.35	3168.94
ENSG00000172380	GNG12	2274.57	382.974	12.9307	97.0034	59.1144	147.712	1136.36	12.757	7.442
ENSG00000206538	VGLL3	1556.69	352.336	2.39458	23.6707	7.7346	0	1090.15	6.00331	3.38273
ENSG00000139793	MBNL2	1462.87	444.25	410.909	256.665	448.607	3303.38	1541.1	476.513	508.762
ENSG00000101294	HM13	3964.7	1792.32	889.346	1456.44	1529.79	1262.27	2513.16	905.749	962.724
ENSG00000012822	CALCOCO1	2977.87	1562.53	2857.69	3036.81	2514.3	886.273	2465.24	3480.42	3551.19
ENSG00000067900	ROCK1	2663.75	1470.62	3277.7	1986.02	3072.29	3491.38	3281.57	3706.29	3340.78
ENSG00000078674	PCM1	1936.83	1516.58	3566.48	1854.2	2523.14	4149.37	2440.43	3292.07	4322.45
ENSG00000148154	UGCG	2806.21	1914.87	2396.97	1445.3	2512.64	5962.2	3040.27	1148.88	1261.76
ENSG00000073712	FERMT2	1601.86	551.483	18.1988	88.649	190.05	255.139	1085.87	71.2893	14.884
ENSG00000130741	EIF2S3	3766.63	2680.82	3270.03	2790.82	2877.82	4458.22	2118.69	2238.48	3434.82
ENSG00000090006	LTBP4	1198.1	1914.87	1340.48	1218.81	717.108	711.704	850.556	703.888	1422.77
ENSG00000095787	WAC	3312.83	3171.02	4590.4	3901.49	4465.07	8285.31	6062.57	7068.9	5210.75
ENSG00000183508	TENT5C	1494.84	15625.3	2283.95	3817.01	8206.96	6741.05	4860.32	629.597	1507.34
ENSG00000167601	AXL	1100.11	382.974	22.509	179.155	605.509	174.569	1763.58	22.5124	21.6495
ENSG00000077150	NFKB2	3957.75	5928.44	2565.07	4746.67	8266.63	16060.3	10691.9	2337.54	2534.34
ENSG00000095564	BTAF1	3045.97	1378.71	3817.43	2083.02	2596.06	4216.51	3169.48	2374.31	3502.48
ENSG00000060982	BCAT1	3006.36	260.422	47.4126	184.26	349.162	644.563	2137.51	235.63	39.2396
ENSG00000140545	MFGE8	455.888	566.802	775.843	509.616	553.576	308.853	292.646	620.592	825.385
ENSG00000188554	NBR1	4252.41	2726.77	2809.32	3503.73	4245.74	1127.98	1820.91	1977.34	3403.7
ENSG00000182149	IST1	3156.47	4120.8	3503.26	3785.92	3560.68	6271.06	4976.7	4615.04	3856.31
ENSG00000075151	EIF4G3	1990.34	1271.47	925.264	1033.62	1771.78	1678.55	1306.64	1461.81	654.219
ENSG00000089053	ANAPC5	1799.23	1930.19	2662.29	2485.42	2651.31	1638.26	2703.98	2875.59	3052.57
ENSG00000131238	PPT1	845.06	2205.93	1191.06	1910.83	2076.74	832.56	984.044	1369.51	1322.65
ENSG00000084754	HADHA	1972.27	2834.01	2276.28	3079.51	2966.77	2188.83	1659.18	2477.87	2748.13
ENSG00000198053	SIRPA	1968.8	689.353	21.0723	203.289	472.915	913.13	1963.81	163.59	31.1211
ENSG00000136527	TRA2B	3319.09	8210.96	4005.65	3684.27	4033.59	19739.7	6324.41	3229.78	4002.44
ENSG00000131473	ACLY	3223.18	1976.15	2285.86	3326.43	2840.25	725.133	1719.08	2564.91	2528.93
ENSG00000112414	ADGRG6	3134.23	490.207	2.39458	58.4805	212.701	134.284	2149.49	15.7587	4.05927
ENSG00000039560	RAI14	2513.64	122.552	19.6355	81.2229	204.414	93.9987	652.892	8.25455	12.8544
ENSG00000213949	ITGA1	580.284	612.758	18.1988	192.614	126.516	107.427	760.709	1045.33	29.0915
ENSG00000139218	SCAF11	3761.77	1654.45	5269.03	2732.34	3276.71	4887.93	5475.56	4607.54	5913.68
ENSG00000106333	PCOLCE	113.972	2359.12	28.256	56.624	30.9384	255.139	74.4451	89.2992	43.2989
ENSG00000177731	FLII	3706.17	2941.24	3663.7	5321.73	4569.49	1557.69	4584.79	4117.52	4217.58
ENSG00000204256	BRD2	3897.98	4442.5	3623.95	4591.65	3672.83	11306.7	5191.47	7706	6384.56
ENSG00000175390	EIF3F	1592.83	4672.28	3191.49	2775.97	2455.73	5680.21	2786.98	3217.02	3776.48
ENSG00000162745	OLFML2B	107.022	30.6379	2.87349	20.4218	59.6669	26.8568	114.663	4.50248	7.442
ENSG00000110719	TCIRG1	4603.36	3508.04	2685.28	3262.84	3705.98	1275.7	4019.18	4506.98	2286.05
ENSG00000143119	CD53	5878.59	7812.67	6416.03	10437.4	9114.12	4377.65	6364.63	5646.11	4560.59
ENSG00000136758	YME1L1	3403.87	3140.39	2748.97	2462.22	3624.21	4605.94	3177.18	2518.39	3071.52
ENSG00000117298	ECE1	3856.28	1792.32	2327.05	2747.19	2117.07	5357.93	2688.58	1699.69	1582.44
ENSG00000144136	SLC20A1	1273.15	4182.08	1480.81	1305.14	1196.65	6902.19	4885.14	1450.55	1311.14
ENSG00000169508	GPR183	1854.82	7965.86	1504.27	1766.02	4155.14	2269.4	4395.68	1539.85	1662.95
ENSG00000077097	TOP2B	3182.18	1899.55	4395.96	2977.87	4038.56	4646.22	2757.89	3770.08	5299.38
ENSG00000131018	SYNE1	3228.05	1669.77	4726.41	3239.17	2178.39	1893.4	1689.99	5497.53	5558.5
ENSG00000048740	CELF2	2131.41	2910.6	4541.55	4180.89	4277.23	3182.53	2949.57	4359.9	3654.7
ENSG00000112335	SNX3	1720.7	3063.79	712.147	1214.17	1441.4	6875.33	2608.14	961.28	1149.45
ENSG00000131711	MAP1B	1355.85	842.543	16.2831	41.7718	65.7441	375.995	83.002	55.5306	14.884
ENSG00000034677	RNF19A	2717.95	5545.46	3932.85	2441.79	2631.42	2605.11	6091.66	2514.64	2316.49
ENSG00000105509	HAS1	264.081	2343.8	9.09939	34.3457	26.5186	644.563	5446.47	9.00496	6.76545
ENSG00000065150	IPO5	2505.99	903.819	2250.42	1560.87	2341.37	2578.25	3200.28	2112.41	2131.12
ENSG00000121039	RDH10	1767.96	4856.11	196.355	511.472	367.393	953.415	4728.55	838.212	403.898
ENSG00000111912	NCOA7	5218.39	1332.75	915.207	480.84	838.651	1383.12	2647.51	1241.18	940.398
ENSG00000164096	C4orf3	3237.78	2451.03	1630.71	2185.59	2088.34	805.703	818.896	679.875	1533.05
ENSG00000119314	PTBP3	3998.75	2236.57	4347.11	3806.34	5524.16	4109.09	5187.2	3274.06	3903.67
ENSG00000025796	SEC63	1442.72	1685.09	1407.05	901.343	1554.1	1557.69	1909.9	1238.18	1333.47
ENSG00000204103	MAFB	1090.38	444.25	13.8885	183.332	187.84	563.992	1004.58	12.757	17.5902
ENSG00000139318	DUSP6	3234.3	490.207	14.8464	157.805	287.285	429.708	1320.33	45.7752	31.1211
ENSG00000163162	RNF149	2814.55	3324.21	2617.27	1945.64	1690.56	1530.84	4838.93	1852.02	2338.14
ENSG00000164741	DLC1	690.781	183.828	11.494	31.5609	45.8551	147.712	269.543	5.2529	5.41236
ENSG00000164091	WDR82	2815.94	2542.95	5610.49	6334.93	4752.91	2564.82	3728.24	6119.62	5075.44
ENSG00000144746	ARL6IP5	2410.79	4641.64	3041.59	4415.28	6572.75	4082.23	4648.11	7924.37	3285.98
ENSG00000103657	HERC1	2857.64	1853.59	5294.89	3914.95	3377.26	4216.51	5971.86	4635.31	4963.81
ENSG00000232216	IGHV3-43	40.3072	45.9569	0	0	0	0	1.71138	9.75538	0.676545
ENSG00000079257	LXN	775.565	183.828	57.9487	85.8643	231.485	174.569	593.849	51.0281	144.104
ENSG00000129128	SPCS3	4687.44	2389.76	3242.26	3000.61	3798.79	2537.96	3314.09	1968.34	3285.3
ENSG00000127954	STEAP4	790.159	1623.81	0.478915	7.4261	3.31483	26.8568	15.4024	4.50248	2.70618
ENSG00000179776	CDH5	717.189	61.2758	0.95783	7.89023	1.10494	13.4284	17.1138	0	2.02964
ENSG00000100342	APOL1	4432.4	1179.56	354.876	949.612	720.975	201.426	1062.77	546.301	302.416
ENSG00000105220	GPI	7898.81	3707.19	2069.87	5198.73	3342.45	1463.69	2379.68	1890.29	1593.94
ENSG00000133789	SWAP70	1926.4	413.612	424.798	608.94	542.527	4673.08	545.075	6340.25	702.254
ENSG00000211664	IGLV2-18	0.694951	15.319	0	0.464131	0	0	43.6402	21.762	0.676545
ENSG00000109099	PMP22	625.456	765.948	16.2831	83.0795	126.516	147.712	307.193	2.25124	8.79509
ENSG00000048828	FAM120A	4670.07	2849.33	3549.72	4110.81	4272.26	3531.67	3727.39	2906.35	2735.27
ENSG00000135390	ATP5MC2	1191.84	4503.77	1302.17	1651.84	2007.13	2766.25	1242.46	617.591	1694.07
ENSG00000178719	GRINA	3970.95	1516.58	768.18	1095.35	1480.07	913.13	1382.8	526.04	527.029
ENSG00000141480	ARRB2	1460.09	1976.15	1102.94	1780.87	1364.6	1195.13	3452.71	2377.31	2219.07
ENSG00000109920	FNBP4	3509.5	2190.61	5778.11	2978.79	3233.06	6083.06	5288.17	10693.4	6840.55
ENSG00000106263	EIF3B	2881.27	2711.46	2570.82	2774.11	2827	4122.51	3753.06	3122.47	2428.8
ENSG00000180447	GAS1	45.1718	367.655	0.95783	4.64131	33.7007	80.5703	119.797	7.50414	6.08891
ENSG00000155254	MARVELD1	665.763	597.439	13.8885	22.2783	85.633	40.2852	1349.42	6.00331	17.5902
ENSG00000154380	ENAH	495.5	214.465	4.31024	25.0631	144.747	214.854	204.51	37.5207	19.6198
ENSG00000148396	SEC16A	3298.24	1240.84	6112.87	4468.19	3527.53	2229.11	3979.82	3478.17	3275.16
ENSG00000149187	CELF1	4118.28	2818.69	4529.58	4338.23	3541.34	4874.5	5992.4	6138.38	4584.95
ENSG00000168685	IL7R	3940.37	6234.82	2915.64	2736.98	5132.46	4297.08	8781.1	5041.28	9023.09
ENSG00000137509	PRCP	595.573	873.181	244.726	424.216	491.147	483.422	378.215	417.98	343.685
ENSG00000018280	SLC11A1	1731.82	122.552	16.2831	139.239	551.919	134.284	1327.18	34.519	14.2075
ENSG00000174059	CD34	93.1234	137.871	0	0.928262	2.20989	40.2852	9.4126	0.750414	2.02964
ENSG00000145147	SLIT2	82.6992	61.2758	2.87349	13.9239	27.6236	0	444.959	12.0066	2.02964
ENSG00000107854	TNKS2	3025.82	1792.32	3457.29	2393.99	2640.26	3759.95	3713.7	5230.38	4445.58
ENSG00000143387	CTSK	121.616	444.25	116.376	117.889	167.951	550.564	206.221	249.888	196.875
ENSG00000083799	CYLD	6686.82	5652.7	17958.4	7615.93	8987.6	12877.8	15771.2	8392.63	8683.46
ENSG00000182095	TNRC18	3002.88	1332.75	2323.7	2520.7	1894.98	939.987	1607.84	1585.62	1564.17
ENSG00000125144	MT1G	1660.24	291.06	1.43675	28.7761	17.6791	389.423	3160.92	1.50083	0
ENSG00000125991	ERGIC3	1321.8	2389.76	1226.5	1504.71	1667.36	1812.83	1636.94	1425.04	1635.89
ENSG00000092148	HECTD1	3286.42	1577.85	3456.81	1932.64	2427.01	4041.94	4584.79	3005.41	3587.72
ENSG00000110713	NUP98	2963.97	3094.43	3376.83	3566.38	3158.48	6123.34	3742.79	4197.81	3252.15
ENSG00000103994	ZNF106	2289.86	1225.52	2086.15	1513.07	2008.23	2846.82	2340.31	2341.29	2172.39
ENSG00000077232	DNAJC10	1610.9	1041.69	1758.1	1138.05	2307.12	2027.69	1993.76	1289.21	1734.66
ENSG00000107223	EDF1	2478.2	5300.36	1427.65	2241.29	2560.7	3182.53	2609	1680.93	2081.73
ENSG00000186635	ARAP1	2561.59	1332.75	2353.87	2871.58	2586.12	1893.4	4153.52	3016.66	2617.55
ENSG00000166794	PPIB	1499.7	1516.58	347.214	758.39	978.979	725.133	1189.41	534.295	663.691
ENSG00000164574	GALNT10	2277.35	1654.45	1172.38	2344.79	2482.81	1181.7	2928.17	1303.47	793.588
ENSG00000121774	KHDRBS1	3062.65	4442.5	2825.6	3486.09	3534.16	2296.25	2103.29	2308.27	2543.81
ENSG00000167548	KMT2D	4448.38	1409.34	7764.65	7272.47	3573.94	3249.67	6278.2	12089.9	6523.25
ENSG00000211668	IGLV2-11	253.657	520.845	0.478915	15.7805	0	0	4.27845	139.577	6.76545
ENSG00000128641	MYO1B	1055.63	30.6379	10.0572	73.3327	198.89	255.139	330.297	32.2678	16.9136
ENSG00000003989	SLC7A2	3033.46	91.9138	5.26807	69.1555	145.3	389.423	1408.47	16.5091	4.05927
ENSG00000110696	C11orf58	3784.7	3814.42	3182.87	3009.43	3411.51	4364.23	2479.79	2218.97	3024.83
ENSG00000134851	TMEM165	2437.19	1133.6	942.026	1000.2	1083.95	1477.12	2196.56	1206.67	896.423
ENSG00000064666	CNN2	1861.08	4519.09	2163.26	2996.89	2370.65	2994.53	1949.26	4090.51	1709.63
ENSG00000164754	RAD21	4312.17	3967.61	4749.88	3909.38	6569.99	3961.37	4488.1	5255.15	5924.51
ENSG00000065809	FAM107B	3155.77	6740.34	4372.02	4684.94	4942.96	10393.6	8300.2	8060.94	4775.73
ENSG00000129003	VPS13C	4045.31	2542.95	7189.95	3974.82	4636.89	2725.96	3966.98	7840.32	8940.55
ENSG00000083444	PLOD1	2316.27	643.396	83.3312	247.382	265.186	886.273	629.788	127.57	71.0373
ENSG00000055609	KMT2C	3184.27	1424.66	4374.89	2669.22	1965.14	7479.61	5747.67	6474.57	3699.35
ENSG00000225733	FGD5-AS1	2371.87	1899.55	2577.52	2704.03	2501.59	2363.4	2990.64	2627.2	2619.58
ENSG00000163659	TIPARP	1461.48	3967.61	733.219	1688.97	966.272	3840.52	2981.23	3740.06	4712.14
ENSG00000186174	BCL9L	2998.71	811.905	2752.8	2326.23	1140.85	751.99	4185.18	3911.91	2090.53
ENSG00000117984	CTSD	2103.62	4090.16	395.584	1084.21	1365.16	845.988	2531.13	493.022	384.278
ENSG00000173193	PARP14	20802	1792.32	3407	3036.81	2177.29	6808.19	3996.07	7237.74	2471.42
ENSG00000116871	MAP7D1	3218.32	3431.45	1568.45	3179.3	2362.92	2323.11	4714	6447.55	3068.13
ENSG00000070961	ATP2B1	1954.2	1715.72	936.279	682.737	990.581	5881.63	4277.6	1603.63	1792.17
ENSG00000084623	EIF3I	1981.31	3400.81	1156.1	2070.49	2251.32	2363.4	2168.32	1575.87	1714.37
ENSG00000002549	LAP3	9959.34	2512.31	472.689	1647.67	1195	1571.12	1093.57	1099.36	573.034
ENSG00000106565	TMEM176B	1429.51	2297.84	11.494	77.974	241.43	201.426	332.864	15.7587	10.8247
ENSG00000135018	UBQLN1	3594.29	3324.21	3752.3	3554.78	4173.92	5881.63	3700.86	2345.79	3513.3
ENSG00000138166	DUSP5	1099.41	7429.7	178.635	327.212	603.851	2188.83	1743.04	83.2959	77.1262
ENSG00000150593	PDCD4	3604.02	7490.97	6598.01	3992.92	4551.26	4337.37	4894.55	6010.81	4444.9
ENSG00000134910	STT3A	2585.22	1608.49	1062.23	1631.42	1667.91	1033.99	2341.17	1517.34	1196.81
ENSG00000136813	ECPAS	3464.33	1302.11	2574.17	2080.24	2280.05	3195.96	3936.18	2104.91	2557.34
ENSG00000005884	ITGA3	7741.06	2788.05	546.921	903.663	1018.2	550.564	2936.73	433.739	412.016
ENSG00000171456	ASXL1	2462.21	3079.11	4636.38	4296.93	4344.63	6056.2	4601.9	6675.68	4248.7
ENSG00000130164	LDLR	445.464	2374.44	441.56	727.293	595.564	738.561	2950.42	591.326	877.479
ENSG00000142669	SH3BGRL3	2531.01	5239.08	1598.14	4640.38	3221.46	1624.83	1584.74	4383.92	2791.43
ENSG00000198898	CAPZA2	2429.55	2221.25	1119.22	1287.04	1862.93	2833.39	2033.98	1215.67	1334.15
ENSG00000198517	MAFK	1618.54	781.267	1010.51	831.259	612.138	1302.55	3484.37	1043.08	1249.58
ENSG00000158869	FCER1G	785.295	796.586	15.3253	140.632	345.295	590.849	680.274	42.7736	49.3878
ENSG00000165757	JCAD	285.625	0	3.35241	14.8522	10.497	40.2852	33.3719	3.75207	8.11854
ENSG00000244575	IGKV1-27	86.1739	45.9569	1.43675	8.35436	0	201.426	2.56707	94.5521	1.35309
ENSG00000071553	ATP6AP1	1431.6	1960.83	1116.35	1824.5	1635.87	510.279	2169.18	1551.86	1634.53
ENSG00000167522	ANKRD11	3438.62	2144.65	4763.29	4076.93	3101.57	3249.67	6428.8	9789.15	5130.24
ENSG00000143570	SLC39A1	2166.86	1470.62	462.632	1037.33	1234.22	550.564	2077.62	1016.81	666.397
ENSG00000129083	COPB1	3896.59	2205.93	1817	1787.83	2244.69	2967.67	3288.42	2365.3	2413.24
ENSG00000156261	CCT8	3309.36	2864.65	2196.78	2381.92	3489.96	7211.04	3500.63	2158.19	2545.16
ENSG00000089220	PEBP1	1162.65	3753.15	1534.92	1912.22	1918.73	832.56	1451.25	1455.05	2045.87
ENSG00000130396	AFDN	1813.82	643.396	714.541	438.604	1033.12	2497.68	4352.04	1355.25	465.463
ENSG00000105329	TGFB1	2375.34	4611.01	2198.22	2876.22	2220.93	4310.51	10751.8	3026.42	2204.18
ENSG00000143870	PDIA6	2524.76	1608.49	740.403	1382.18	2015.42	966.844	1724.22	1024.31	709.02
ENSG00000136205	TNS3	1264.81	1761.68	40.7078	261.77	259.109	1168.27	763.276	801.442	44.652
ENSG00000130844	ZNF331	851.315	11060.3	1289.72	993.241	545.289	2954.24	3268.74	369.954	1058.79
ENSG00000116044	NFE2L2	2321.83	5591.42	1780.61	1058.68	1752.99	2873.67	2485.78	1312.47	2131.12
ENSG00000197451	HNRNPAB	1311.37	2696.14	932.927	1461.08	1429.8	2645.39	2466.1	1915.06	1223.87
ENSG00000153944	MSI2	3466.42	2512.31	3748.47	3782.67	3096.6	2913.96	4238.24	3156.24	2615.52
ENSG00000142599	RERE	2272.49	1302.11	2051.67	1829.14	1373.44	2363.4	2425.88	6192.41	2299.58
ENSG00000049860	HEXB	1289.83	1210.2	618.758	995.097	1287.26	1168.27	960.94	352.694	846.358
ENSG00000071282	LMCD1	196.671	168.509	52.6807	249.238	416.011	161.141	200.232	81.7951	108.924
ENSG00000166197	NOLC1	2003.54	1731.04	1795.45	1821.71	2181.16	2591.68	3816.38	1805.5	2037.75
ENSG00000152492	CCDC50	1614.37	1378.71	948.252	1121.34	1656.86	2967.67	1400.77	2762.27	1342.94
ENSG00000197702	PARVA	1023.66	796.586	5.26807	34.8098	50.8274	187.997	306.337	15.7587	14.2075
ENSG00000101150	TPD52L2	3320.48	1547.21	1005.24	1257.33	1591.67	1275.7	3077.06	917.006	1209.66
ENSG00000107290	SETX	5589.49	1700.4	4523.35	2966.73	3482.23	4901.36	4257.06	6932.32	5511.82
ENSG00000170145	SIK2	1389.21	781.267	1218.84	861.891	546.394	1047.41	1625.81	971.786	894.393
ENSG00000092010	PSME1	3371.9	5223.77	1758.1	3542.71	3412.06	2537.96	2082.75	3484.92	2202.83
ENSG00000114423	CBLB	1493.45	1685.09	1828.98	1542.77	1261.84	1369.7	3486.08	2152.19	2769.1
ENSG00000177189	RPS6KA3	3362.87	2037.42	3344.26	2710.06	3472.28	4135.94	4097.9	3844.37	4072.13
ENSG00000165458	INPPL1	2791.62	1485.94	1987.98	2319.73	1617.08	1275.7	3245.63	3896.15	2160.21
ENSG00000115963	RND3	3920.22	1133.6	5.74698	70.5479	419.326	510.279	2567.07	21.0116	6.76545
ENSG00000118058	KMT2A	4134.26	2282.53	8385.33	5919.06	4520.87	4511.94	7592.54	10057.8	7897.99
ENSG00000122565	CBX3	2512.94	3416.13	2374.46	2671.07	3719.24	3142.24	2155.48	2552.91	3059.34
ENSG00000101474	APMAP	966.677	2267.21	1050.26	1598.93	1573.44	765.418	2642.37	1353	1409.92
ENSG00000100030	MAPK1	1927.79	1792.32	2995.61	3012.68	2949.64	2121.68	3011.17	2664.72	2809.02
ENSG00000156804	FBXO32	815.873	658.715	402.768	626.577	429.823	845.988	3391.1	733.154	1111.56
ENSG00000196730	DAPK1	2199.52	199.146	8.62047	122.995	356.896	375.995	1775.56	37.5207	12.8544
ENSG00000078304	PPP2R5C	4180.83	4886.75	8352.28	7091.46	5358.97	4619.36	8157.3	7445.61	7218.74
ENSG00000169429	CXCL8	40029.9	1731.04	215.512	3288.37	19802.2	14516.1	21131.3	391.716	109.6
ENSG00000106609	TMEM248	2065.39	1899.55	2041.62	2556.9	2498.28	1423.41	2344.59	2059.89	1979.57
ENSG00000102316	MAGED2	1878.45	2037.42	2064.6	2811.24	2320.93	671.419	1272.41	1318.48	2074.29
ENSG00000164694	FNDC1	7.64446	15.319	1.43675	11.1391	8.28707	13.4284	1763.58	7.50414	9.47164
ENSG00000173020	GRK2	3257.93	4442.5	5842.29	6729.44	5725.26	4323.94	5768.21	6868.54	5790.55
ENSG00000114978	MOB1A	4314.95	3538.68	3438.61	4091.78	4741.86	7412.47	3644.39	4986.5	4214.88
ENSG00000110917	MLEC	2289.86	965.094	1271.04	1975.81	2021.49	1168.27	2643.23	819.452	1416.69
ENSG00000123908	AGO2	2847.21	2006.78	3658.43	2710.06	2146.9	5895.06	7482.16	2776.53	4497.67
ENSG00000023445	BIRC3	12237.4	10570.1	8064.93	7952.42	25954	32268.4	12269.7	7030.63	11529
ENSG00000213923	CSNK1E	1461.48	1654.45	840.975	1021.55	1091.13	1477.12	2472.09	1282.46	1069.62
ENSG00000135829	DHX9	3385.11	3523.36	4814.06	4161.86	5116.99	8352.46	4715.71	7747.27	5216.16
ENSG00000148358	GPR107	2175.2	919.138	1359.16	1476.4	1436.43	1853.12	2253.03	1477.56	1011.44
ENSG00000100129	EIF3L	1359.32	2236.57	2798.78	2374.03	2394.96	4001.66	1903.91	2719.5	3278.54
ENSG00000061273	HDAC7	2233.57	3048.47	2452.52	2510.95	3136.38	1960.54	2306.09	2472.61	1758.34
ENSG00000138834	MAPK8IP3	3625.56	1976.15	4703.43	3810.52	2157.4	9896.72	7437.66	6073.85	4344.1
ENSG00000266714	MYO15B	946.523	658.715	7210.07	1059.15	246.955	2027.69	729.048	859.974	4132.34
ENSG00000166326	TRIM44	2903.51	1777	2964.01	1939.6	1399.96	1221.98	1612.98	3208.77	1964.69
ENSG00000157637	SLC38A10	1993.12	1394.03	1570.84	1869.98	1518.74	577.421	1141.49	1873.78	1311.14
ENSG00000170989	S1PR1	1274.54	719.991	3093.31	1457.37	1022.62	1423.41	1203.96	3215.52	2455.86
ENSG00000185630	PBX1	636.575	352.336	11.015	19.4935	190.05	107.427	504.002	11.2562	4.73582
ENSG00000101367	MAPRE1	1612.98	3661.23	1437.22	2167.96	2443.03	3719.66	2810.09	1617.89	1609.5
ENSG00000177311	ZBTB38	1747.8	1501.26	2182.42	2460.82	3484.99	2041.11	4242.51	13481.2	3191.26
ENSG00000010810	FYN	5988.39	6173.54	9455.7	10397.5	9057.21	3397.38	12031.9	5622.1	8734.2
ENSG00000004534	RBM6	2301.68	2144.65	5036.27	3100.86	3312.07	4216.51	3740.22	4367.41	4568.03
ENSG00000141551	CSNK1D	2505.99	2558.27	3441.96	3326.43	2719.26	5519.07	8018.68	3815.1	3079.63
ENSG00000135720	DYNC1LI2	2494.18	796.586	1734.15	1144.55	1235.33	1463.69	2566.22	3315.33	1903.12
ENSG00000081041	CXCL2	1954.2	582.12	8.14156	153.627	466.838	725.133	3072.78	2.25124	9.47164
ENSG00000105701	FKBP8	2997.32	4580.37	2176.19	3395.12	3203.78	1262.27	1883.37	2705.99	3084.37
ENSG00000184205	TSPYL2	3902.85	10677.3	6427.52	4039.33	2759.04	45723.7	17536.5	5907.26	7479.89
ENSG00000281990	IGHV1-69-2	72.9699	0	0	0	0	0	3.42276	4.50248	0
ENSG00000153815	CMIP	2029.26	903.819	1026.79	1601.25	1119.31	845.988	3202.85	919.257	640.688
ENSG00000065613	SLK	2150.87	1087.65	1805.03	1178.89	1380.63	1369.7	3535.71	1270.45	1613.56
ENSG00000107968	MAP3K8	1144.58	2405.08	892.698	345.314	439.767	5344.5	4257.92	491.521	280.766
ENSG00000138688	KIAA1109	3038.33	1777	4668.47	2503.06	2710.98	2913.96	4524.04	4328.39	5858.88
ENSG00000165672	PRDX3	1405.89	1240.84	843.37	1271.72	1785.59	684.848	1660.04	1073.84	806.442
ENSG00000153234	NR4A2	863.129	18076.4	422.882	766.745	393.36	4552.22	3586.2	188.354	534.471
ENSG00000168487	BMP1	1254.39	382.974	56.512	107.214	211.044	40.2852	790.658	101.306	83.2151
ENSG00000167110	GOLGA2	1649.81	888.5	1111.56	1161.26	1023.18	859.417	1582.17	1186.4	1136.6
ENSG00000104331	IMPAD1	2790.92	1102.97	1255.72	1091.64	1409.35	1718.83	2091.31	787.934	899.805
ENSG00000111530	CAND1	2715.87	1623.81	2685.76	1753.02	2539.16	3853.95	2598.73	3253.04	3440.23
ENSG00000137962	ARHGAP29	362.764	137.871	0.478915	3.24892	15.4692	214.854	71.0223	3.75207	6.76545
ENSG00000090924	PLEKHG2	2395.5	2083.38	1845.74	3171.41	2670.65	3880.8	6851.51	2118.42	739.464
ENSG00000106538	RARRES2	1569.2	2282.53	6.2259	28.7761	27.6236	201.426	1444.41	90.8001	12.8544
ENSG00000125089	SH3TC1	630.321	628.077	1144.13	1663.91	1458.52	671.419	2863.14	2246.74	644.071
ENSG00000265190	ANXA8	3894.51	2435.71	5.26807	59.4088	167.951	778.846	3382.54	9.00496	4.05927
ENSG00000174780	SRP72	2781.19	1164.24	1764.8	1272.65	2009.89	3531.67	2099.86	1699.69	1954.54
ENSG00000143420	ENSA	1301.64	4105.48	1507.15	2443.19	2269.55	2309.68	2224.8	2402.07	1570.94
ENSG00000102531	FNDC3A	3471.98	765.948	1774.86	870.246	1452.45	2323.11	2771.58	1440.04	1601.38
ENSG00000117143	UAP1	4104.38	1853.59	250.473	292.867	328.168	1221.98	1684.85	199.61	363.305
ENSG00000125827	TMX4	1606.03	3569.32	1771.03	1887.16	1846.36	1302.55	1678.86	2656.46	3069.49
ENSG00000065308	TRAM2	615.032	367.655	395.584	336.959	286.18	671.419	482.609	767.673	648.807
ENSG00000025708	TYMP	4619.34	2374.44	509.087	2191.63	3010.97	872.845	2223.94	262.645	190.786
ENSG00000102096	PIM2	3177.32	7582.89	8175.56	7532.85	10485.4	4753.65	2096.44	3223.78	2291.46
ENSG00000007237	GAS7	218.215	168.509	8.14156	92.3621	98.3399	295.424	494.589	90.0496	12.8544
ENSG00000170476	MZB1	131.346	321.698	13.4096	97.4675	150.825	161.141	44.4959	169.594	6.76545
ENSG00000008441	NFIX	2727.68	719.991	68.4849	113.248	98.8924	281.996	924.146	96.053	43.2989
ENSG00000107863	ARHGAP21	1013.93	490.207	247.599	297.972	385.625	1275.7	2155.48	540.298	629.864
ENSG00000131981	LGALS3	889.537	2359.12	148.464	1173.32	2857.38	738.561	1225.35	406.724	761.79
ENSG00000073756	PTGS2	7273.36	352.336	28.256	238.099	393.912	550.564	786.38	21.0116	8.11854
ENSG00000188229	TUBB4B	3045.97	4748.88	403.726	1313.96	1194.44	17806	5742.54	1917.31	2578.99
ENSG00000183726	TMEM50A	3043.89	2987.2	1149.88	2041.25	2545.79	1396.55	2750.19	1820.5	1785.4
ENSG00000119801	YPEL5	2266.24	21737.6	2174.28	2393.99	2275.08	7143.9	5661.25	2158.19	2851.64
ENSG00000108829	LRRC59	1990.34	1363.39	322.31	834.044	1006.05	1530.84	2368.55	698.635	517.557
ENSG00000247556	OIP5-AS1	4605.44	2405.08	9717.19	4810.25	5996.52	1718.83	3404.79	4687.83	5166.78
ENSG00000205726	ITSN1	1781.85	413.612	31.6084	61.7294	78.4509	147.712	1395.63	167.342	49.3878
ENSG00000213625	LEPROT	1687.34	1164.24	806.493	981.173	1336.43	402.852	1077.31	473.511	866.655
ENSG00000186468	RPS23	1332.92	3324.21	1693.44	1947.03	1569.57	9561.01	1589.02	1097.86	2813.75
ENSG00000107819	SFXN3	1752.67	842.543	1158.97	1817.54	1038.65	886.273	1855.99	1055.83	2258.31
ENSG00000167123	CERCAM	70.885	153.19	13.8885	34.3457	19.889	120.855	21.3923	13.5074	5.41236
ENSG00000117114	ADGRL2	503.145	367.655	0.95783	2.32066	35.9106	67.1419	753.863	3.75207	4.05927
ENSG00000078618	NRDC	3920.22	1761.68	3292.54	2844.2	3616.48	2631.96	2241.91	3102.96	2546.52
ENSG00000103769	RAB11A	2077.9	1884.23	938.195	1523.74	1749.68	1047.41	1501.74	879.485	1198.84
ENSG00000197629	MPEG1	774.175	597.439	112.545	430.714	65.1916	241.711	159.158	428.486	46.0051
ENSG00000165678	GHITM	2189.1	3324.21	1656.09	2459.43	2930.31	2027.69	2808.38	1915.06	2016.11
ENSG00000182022	CHST15	986.83	229.784	238.5	355.989	167.951	1047.41	1000.3	204.113	23.0025
ENSG00000124795	DEK	3199.55	2175.29	2580.87	2401.41	3189.42	2819.96	3433.89	7695.49	4670.19
ENSG00000158417	EIF5B	1962.54	1332.75	1396.04	999.274	1736.42	2215.68	2748.48	2175.45	2089.85
ENSG00000243264	IGKV2D-29	86.8689	15.319	0.95783	10.675	0	13.4284	23.1036	75.0414	1.35309
ENSG00000120438	TCP1	2127.94	4028.89	1951.1	2135.93	2740.26	17416.6	5247.95	2169.45	2939.59
ENSG00000007168	PAFAH1B1	2057.06	1394.03	3047.82	2503.06	2886.66	3236.24	3184.02	2909.35	2582.37
ENSG00000131507	NDFIP1	2600.51	2956.56	2575.13	3221.53	2988.87	2148.54	2417.33	1290.71	2782.63
ENSG00000082898	XPO1	4204.45	2236.57	4054.98	3136.6	3934.7	13012.1	4214.28	4428.19	4243.97
ENSG00000204217	BMPR2	3946.63	888.5	1031.1	1040.12	1142.51	1221.98	1859.42	1398.02	999.934
ENSG00000065000	AP3D1	3586.64	2236.57	2569.86	2902.21	2645.23	1624.83	2935.87	3593.73	2426.77
ENSG00000179134	SAMD4B	2756.18	1225.52	1363.47	1303.74	971.797	1262.27	2305.23	1215.67	1099.39
ENSG00000171621	SPSB1	605.997	628.077	378.822	512.865	456.894	228.283	1250.16	273.901	195.522
ENSG00000103365	GGA2	3377.46	3048.47	3089	5143.04	2982.79	7734.75	10223.8	4988	2790.07
ENSG00000240342	RPS2P5	1240.49	3722.51	3514.76	2530.44	1430.35	3813.66	3170.33	2912.36	3831.95
ENSG00000143621	ILF2	1994.51	3508.04	1294.51	1898.3	2649.65	5196.79	3013.74	2194.21	1767.81
ENSG00000156030	ELMSAN1	1624.1	2297.84	2123.99	1934.96	1140.3	5008.79	2856.29	3418.89	1336.18
ENSG00000180530	NRIP1	2629.69	474.888	868.273	889.739	1813.76	2349.97	5086.22	640.103	795.617
ENSG00000149311	ATM	4626.98	1838.28	9191.82	3697.73	3339.14	5344.5	3180.6	15005.3	13624.3
ENSG00000010244	ZNF207	4367.07	3523.36	4734.56	3190.9	3846.3	3061.67	3690.59	4990.25	3858.34
ENSG00000112977	DAP	1329.44	1654.45	580.924	818.263	950.803	644.563	1120.95	706.139	589.948
ENSG00000105438	KDELR1	2025.09	1164.24	649.888	808.052	732.024	805.703	1656.62	535.795	810.501
ENSG00000132507	EIF5A	1732.51	3615.27	953.999	1867.66	2164.03	2027.69	1632.66	1613.39	1288.82
ENSG00000105568	PPP2R1A	2268.32	2267.21	1674.77	2585.21	2405.46	1060.84	1567.63	1966.08	1642.65
ENSG00000088247	KHSRP	3645.71	1700.4	2463.06	2801.03	2355.19	2336.54	3451	3381.36	2701.45
ENSG00000175220	ARHGAP1	1854.13	1148.92	1234.16	1390.54	1364.05	349.138	920.723	845.716	1116.98
ENSG00000137831	UACA	295.354	122.552	11.015	9.74675	14.9167	67.1419	132.632	26.2645	4.73582
ENSG00000170876	TMEM43	1852.04	1960.83	1091.93	1985.55	1640.29	725.133	3491.22	1445.3	2000.54
ENSG00000158270	COLEC12	186.942	168.509	3.83132	12.0674	58.0095	53.7135	134.343	4.50248	6.76545
ENSG00000211955	IGHV3-33	187.637	30.6379	9.5783	19.9576	1.10494	0	5.13414	93.0513	8.11854
ENSG00000188529	SRSF10	2824.98	2956.56	4767.12	2710.99	3180.58	8473.31	5061.41	6661.42	4292
ENSG00000148730	EIF4EBP2	2269.71	2910.6	2532.5	3526.93	2944.67	1933.69	2998.34	2500.38	3190.59
ENSG00000177565	TBL1XR1	2956.32	2573.59	2727.9	1780.41	3447.42	3692.81	1847.44	2860.58	2261.01
ENSG00000172354	GNB2	2824.98	2466.35	1278.7	2102.05	2079.5	1571.12	2153.77	1729.7	1800.96
ENSG00000096746	HNRNPH3	3025.12	3998.25	4170.87	3296.26	3597.14	8164.46	4321.24	3609.49	4060.63
ENSG00000137693	YAP1	2107.09	490.207	4.78915	47.3414	137.565	335.71	774.4	10.5058	8.79509
ENSG00000140740	UQCRC2	2034.12	3707.19	1561.26	2113.65	2514.85	2645.39	1900.49	1402.52	2043.17
ENSG00000162645	GBP2	6460.96	6679.07	5862.88	6408.26	6317.51	4780.51	4862.03	17132.7	6825.67
ENSG00000132466	ANKRD17	3170.37	1133.6	2735.56	1846.31	2000.5	1920.26	2707.4	4553.51	2537.05
ENSG00000136859	ANGPTL2	754.717	30.6379	6.70481	11.1391	54.1422	53.7135	17.1138	1.50083	4.05927
ENSG00000093072	ADA2	881.198	1210.2	783.026	973.283	264.634	510.279	382.494	1205.91	1203.57
ENSG00000196405	EVL	5835.5	7291.82	11640	9549.96	7718.58	2873.67	4542.86	10908.8	9638.74
ENSG00000170542	SERPINB9	4507.45	5514.83	1859.15	2737.45	3835.81	5478.78	4639.55	2386.32	2280.63
ENSG00000203879	GDI1	3541.47	2527.63	3062.18	3601.19	3798.24	3612.24	4409.37	2957.38	4038.98
ENSG00000021355	SERPINB1	5407.41	2420.4	1824.67	2115.97	1729.79	1409.98	2181.16	1078.34	1265.82
ENSG00000148672	GLUD1	1462.87	2313.16	1425.73	2047.75	2175.08	2537.96	3150.65	1190.91	1551.32
ENSG00000181104	F2R	1000.03	398.293	255.741	1358.98	271.816	40.2852	827.453	553.805	399.162
ENSG00000050165	DKK3	137.6	168.509	43.1024	20.4218	35.3582	537.135	421.855	103.557	19.6198
ENSG00000126432	PRDX5	1326.66	3278.26	367.807	1003.92	1103.29	845.988	1705.39	752.665	817.267
ENSG00000070404	FSTL3	4412.24	2328.48	73.7529	97.9317	250.269	228.283	1222.78	42.0232	57.5064
ENSG00000270647	TAF15	2594.25	2910.6	2910.37	3944.65	3651.84	2255.97	1666.03	2992.65	2773.16
ENSG00000189060	H1F0	1350.29	153.19	27.7771	132.277	281.208	107.427	128.354	24.7637	30.4445
ENSG00000122870	BICC1	521.213	658.715	1.43675	16.2446	29.8334	201.426	781.245	3.00165	2.02964
ENSG00000141429	GALNT1	1102.89	919.138	714.541	879.528	1028.7	1396.55	1003.72	835.21	920.778
ENSG00000163468	CCT3	2688.07	3048.47	1366.82	2656.22	3098.26	5116.22	3338.05	2429.84	1875.38
ENSG00000184216	IRAK1	2928.52	1608.49	1113.48	1745.13	1620.4	2255.97	2526	2568.67	1116.3
ENSG00000146731	CCT6A	2799.26	2267.21	1532.53	2051.92	2985.55	4780.51	3356.02	2993.4	2492.39
ENSG00000127914	AKAP9	1376.7	750.629	2118.24	1218.34	972.902	3075.1	3387.68	2914.61	3598.54
ENSG00000028528	SNX1	2219.67	1807.64	2957.3	2668.29	2519.82	1584.55	2223.08	2982.14	2825.93
ENSG00000139289	PHLDA1	2606.76	6525.88	179.114	2199.98	2439.16	2443.97	4026.02	357.197	880.186
ENSG00000187555	USP7	2855.55	2941.24	4130.64	3757.61	3701.01	6297.91	4669.5	5893	3825.86
ENSG00000116604	MEF2D	2471.25	3799.1	2564.59	3940.01	3337.48	3612.24	3342.33	2922.11	2296.19
ENSG00000211625	IGKV3D-20	93.1234	0	1.43675	1.85652	0.552471	93.9987	21.3923	21.0116	1.35309
ENSG00000155926	SLA	2086.94	5453.55	1960.68	3151.45	3420.9	1154.84	4433.33	7046.39	2265.07
ENSG00000107798	LIPA	1980.61	1057.01	881.683	1339.02	1307.7	375.995	619.52	590.576	1085.86
ENSG00000163931	TKT	1337.09	1501.26	1082.83	1664.37	2118.17	1423.41	1804.65	1066.34	1533.73
ENSG00000136960	ENPP2	218.215	199.146	3.35241	37.5946	12.1544	174.569	77.0121	10.5058	17.5902
ENSG00000137077	CCL21	34.0526	0	0	6.96197	0	40.2852	29.0935	0	0.676545
ENSG00000115760	BIRC6	3450.43	949.776	5633.96	3942.33	3994.37	4283.66	3949.01	7934.87	5286.53
ENSG00000162512	SDC3	805.448	245.103	8.14156	60.8012	34.2532	147.712	291.79	18.0099	7.442
ENSG00000125347	IRF1	4356.65	7812.67	2990.35	2860.44	3212.62	4229.94	5158.1	6078.35	1786.76
ENSG00000135916	ITM2C	663.678	1363.39	1469.31	1158.01	946.383	1020.56	1238.18	1392.77	616.333
ENSG00000118762	PKD2	1857.6	398.293	719.81	376.41	654.678	53.7135	583.581	240.132	177.931
ENSG00000197256	KANK2	906.911	291.06	5.74698	31.5609	103.865	13.4284	63.3211	27.7653	25.7087
ENSG00000134109	EDEM1	3481.7	2634.86	4181.41	4356.33	3145.22	8339.03	3996.93	8457.91	4549.77
ENSG00000124422	USP22	1448.28	1179.56	2075.14	2251.5	1543.05	1960.54	1918.46	2693.23	2249.51
ENSG00000065534	MYLK	307.863	153.19	46.4548	25.9913	22.0989	80.5703	19.6809	59.2827	24.3556
ENSG00000141002	TCF25	1512.91	2359.12	1786.83	1908.97	1775.64	1705.41	4015.76	3580.22	2929.44
ENSG00000108510	MED13	3619.31	1593.17	2961.61	2209.26	2862.91	5733.92	5652.69	4127.28	3171.64
ENSG00000169180	XPO6	3270.44	2267.21	4083.23	3748.32	2938.59	2940.82	3223.39	3489.42	3786.62
ENSG00000113387	SUB1	2495.57	6449.28	1830.89	1947.49	3834.7	4323.94	2636.38	1480.57	1800.96
ENSG00000116774	OLFML3	15.2889	122.552	1.91566	10.675	4.41977	107.427	28.2378	10.5058	6.76545
ENSG00000005339	CREBBP	3660.31	2267.21	6004.16	4973.63	3665.65	5344.5	6928.53	8136.74	5005.76
ENSG00000130726	TRIM28	3108.52	4335.27	3196.28	4215.24	3398.25	10084.7	6101.93	5868.24	5224.28
ENSG00000168264	IRF2BP2	1794.36	4611.01	1378.8	2381.92	2027.57	3947.95	2469.52	1140.63	1689.33
ENSG00000092295	TGM1	3730.5	1363.39	135.533	111.391	59.1144	80.5703	1185.13	97.5538	165.754
ENSG00000143537	ADAM15	1485.11	1715.72	321.831	695.268	839.204	335.71	1252.73	310.671	426.224
ENSG00000153922	CHD1	1660.24	3125.07	3103.85	1371.04	2077.29	6593.34	4868.88	3174.25	3436.17
ENSG00000117228	GBP1	12992.1	1133.6	1130.72	1279.15	1434.77	456.565	960.94	3634.25	633.923
ENSG00000145391	SETD7	1359.32	643.396	1252.84	1126.91	1529.24	1127.98	1343.43	1281.71	1801.64
ENSG00000114354	TFG	2366.31	1853.59	1148.44	891.596	859.645	1691.98	2514.02	734.655	897.099
ENSG00000135480	KRT7	1765.87	30.6379	27.2982	36.2022	77.346	0	3356.87	21.0116	8.79509
ENSG00000099875	MKNK2	3572.05	5070.58	3140.73	4412.49	2970.64	21176.6	4227.11	4876.19	3885.4
ENSG00000100393	EP300	3093.92	1792.32	4500.37	4135.87	3240.24	4135.94	5437.91	7468.87	4223
ENSG00000103855	CD276	1684.56	536.164	12.9307	99.7882	188.945	134.284	765.843	24.7637	14.2075
ENSG00000104388	RAB2A	1606.73	1884.23	1053.61	1127.84	1201.63	1517.41	1986.91	750.414	944.457
ENSG00000123094	RASSF8	1296.08	382.974	9.5783	51.0544	143.643	228.283	2728.8	33.0182	17.5902
ENSG00000189266	PNRC2	3052.92	3952.29	1836.16	1629.1	2121.49	3746.52	2204.26	4299.87	3168.26
ENSG00000064607	SUGP2	2446.92	2221.25	3816.48	3054.45	2390.54	2443.97	3500.63	4725.36	3399.64
ENSG00000168497	CAVIN2	136.905	91.9138	0.95783	7.89023	39.7779	80.5703	35.939	0.750414	1.35309
ENSG00000166949	SMAD3	6256.64	1286.79	2736.52	3478.2	2966.77	3383.95	5105.05	3899.15	4990.88
ENSG00000161202	DVL3	2512.25	1026.37	1260.03	1538.13	1203.83	1275.7	2635.53	2110.16	1301.67
ENSG00000137507	LRRC32	1436.46	980.413	3053.08	839.613	767.935	147.712	772.689	117.065	786.146
ENSG00000171490	RSL1D1	2439.97	3048.47	2146.02	1593.83	2205.47	5223.64	2471.23	2284.26	3267.04
ENSG00000116288	PARK7	1565.72	4166.76	942.505	1914.08	2883.9	1436.84	1571.9	1219.42	1457.96
ENSG00000116717	GADD45A	2711.7	4488.46	347.214	983.494	2739.71	8151.03	3197.72	364.701	787.499
ENSG00000115548	KDM3A	5476.21	1608.49	3365.82	2658.08	2134.75	7251.33	3124.98	2703.74	4114.75
ENSG00000089159	PXN	2721.43	1072.33	1960.68	1336.7	1060.74	604.277	1450.4	1280.96	1399.77
ENSG00000159658	EFCAB14	2606.76	2006.78	2419.48	2854.41	2485.57	2041.11	2341.17	2364.55	2920.65
ENSG00000154864	PIEZO2	300.914	61.2758	0	8.35436	23.7563	120.855	779.534	1.50083	2.02964
ENSG00000113712	CSNK1A1	2484.45	1210.2	1376.88	1533.03	1528.69	1289.13	2316.35	1705.69	1717.07
ENSG00000162231	NXF1	4168.32	5560.78	3302.6	3948.83	3056.82	15388.9	10820.2	3419.64	5516.55
ENSG00000165502	RPL36AL	1710.97	6311.41	1447.28	1718.68	2254.64	5210.21	2418.18	1545.85	3064.75
ENSG00000053254	FOXN3	1285.66	735.31	2261.92	1795.72	2012.65	859.417	1635.22	2263.25	1209.66
ENSG00000103811	CTSH	1006.98	765.948	155.169	478.983	508.826	1785.98	503.146	1677.17	165.077
ENSG00000129353	SLC44A2	2700.58	3416.13	4688.58	4808.86	4335.79	1772.55	2150.35	5276.16	4189.17
ENSG00000135624	CCT7	2877.1	2895.28	1841.43	2885.97	3413.72	1745.69	1776.41	2850.82	2104.73
ENSG00000123338	NCKAP1L	2331.56	3048.47	3791.57	5602.53	5129.7	2457.39	1998.89	5014.26	3316.43
ENSG00000204469	PRRC2A	3405.26	1746.36	3588.03	3856.93	2952.41	2081.4	3658.08	4561.77	3323.19
ENSG00000198900	TOP1	3337.15	2251.89	1660.88	1288.89	2078.4	3357.1	3169.48	2010.36	1806.38
ENSG00000204525	HLA-C	4684.67	42111.8	1505.71	13300.6	4338	2390.25	3767.61	15989.1	817.267
ENSG00000132780	NASP	1485.11	2834.01	2083.76	1686.19	1691.67	10151.9	1888.51	2594.93	1936.27
ENSG00000113580	NR3C1	4472.01	4304.63	3691	3726.97	4005.42	3827.09	6819	2657.22	4160.08
ENSG00000127184	COX7C	1587.27	6234.82	1532.53	2065.38	2273.97	4149.37	1753.31	1479.07	2308.37
ENSG00000124920	MYRF	2572.01	689.353	68.4849	199.576	299.992	496.85	2871.7	181.6	69.6842
ENSG00000100731	PCNX1	3903.54	1761.68	5326.49	3230.82	3101.57	3263.1	4476.97	4264.6	4350.19
ENSG00000204463	BAG6	2719.34	2451.03	2303.1	2930.99	2407.12	1651.69	2464.39	3494.68	2812.4
ENSG00000011600	TYROBP	806.143	1026.37	3.83132	122.531	223.751	496.85	598.128	78.7934	9.47164
ENSG00000113269	RNF130	626.846	674.034	257.656	257.593	233.695	523.707	783.813	194.357	211.082
ENSG00000164054	SHISA5	3678.38	2374.44	1775.82	3246.6	1973.43	671.419	1008.86	1416.03	2506.6
ENSG00000100941	PNN	2399.67	3048.47	2860.08	1750.24	2372.31	4981.93	3146.37	3596.73	3205.47
ENSG00000006327	TNFRSF12A	2148.79	536.164	18.1988	178.69	216.016	563.992	2167.46	137.326	55.4767
ENSG00000138772	ANXA3	3428.19	2098.7	1.43675	47.8055	119.886	631.134	1523.98	6.75372	0
ENSG00000185591	SP1	3500.47	980.413	3661.79	4014.73	2863.46	1369.7	1944.13	4056.74	3825.86
ENSG00000111540	RAB5B	3114.77	1685.09	2175.23	3463.81	2485.02	1074.27	2033.98	2375.81	2974.09
ENSG00000142634	EFHD2	2089.72	3982.93	892.698	2600.06	3282.78	2323.11	3294.41	745.911	926.191
ENSG00000254999	BRK1	1499.01	2711.46	885.035	1773.44	2088.34	1168.27	1418.73	1606.64	1325.35
ENSG00000103479	RBL2	2102.23	2098.7	5558.77	3672.21	3571.73	939.987	2129.81	3723.55	4455.05
ENSG00000165637	VDAC2	2321.14	2251.89	1060.8	1337.63	1429.24	3075.1	2257.31	740.658	1236.05
ENSG00000164164	OTUD4	3500.47	1302.11	2585.18	1821.71	1972.32	4579.08	3678.61	2549.16	2363.85
ENSG00000069956	MAPK6	1464.26	1102.97	480.352	684.129	935.334	1785.98	2302.66	643.855	1132.54
ENSG00000173846	PLK3	799.889	2558.27	1212.13	1147.8	979.532	3209.38	3145.52	1204.41	1045.26
ENSG00000211951	IGHV2-26	31.2728	30.6379	0.478915	0.928262	1.10494	0	82.1463	9.75538	0
ENSG00000089154	GCN1	3116.86	1746.36	4109.57	4852.49	3656.25	3249.67	5241.1	4995.5	4013.27
ENSG00000005810	MYCBP2	3476.15	1838.28	4678.52	3056.77	3910.94	4055.37	2729.65	6893.3	5214.81
ENSG00000134313	KIDINS220	2245.39	719.991	2209.71	1576.19	1735.86	1221.98	2089.6	1600.63	2041.81
ENSG00000008018	PSMB1	1257.17	3477.4	1280.62	1691.76	2079.5	3195.96	1642.93	1328.98	1366.62
ENSG00000196923	PDLIM7	922.2	965.094	79.4999	238.563	334.798	765.418	919.867	172.595	88.6274
ENSG00000119383	PTPA	2327.39	2696.14	901.797	1800.36	1528.14	1315.98	1233.05	1063.34	907.247
ENSG00000113648	H2AFY	1774.21	1777	1685.78	1718.21	1898.29	899.702	1651.48	1187.15	1289.5
ENSG00000133226	SRRM1	2662.36	2650.18	4423.26	2644.62	2404.91	3195.96	2610.71	2994.9	3490.3
ENSG00000007908	SELE	365.544	168.509	12.4518	6.0337	1.65741	26.8568	1.71138	117.815	10.1482
ENSG00000182087	TMEM259	3009.14	3324.21	3088.52	3255.42	2966.22	3625.66	4132.13	3562.96	3321.84
ENSG00000124214	STAU1	2995.24	2757.41	1490.86	1681.55	1903.82	2967.67	2410.48	1710.94	1583.79
ENSG00000111961	SASH1	662.983	199.146	7.66264	32.4892	44.7502	134.284	400.463	44.2744	6.76545
ENSG00000107862	GBF1	1890.27	1026.37	2339.02	2457.11	2233.09	2296.25	3853.17	2859.08	1637.24
ENSG00000211937	IGHV2-5	67.4103	30.6379	1.43675	11.1391	1.10494	67.1419	0.855691	65.286	6.08891
ENSG00000211935	IGHV1-3	67.4103	15.319	11.015	6.0337	1.10494	13.4284	7.70121	110.311	0
ENSG00000172053	QARS	1236.32	1884.23	1971.22	2446.44	2257.4	1866.55	1511.15	2695.49	2654.76
ENSG00000141905	NFIC	2179.37	949.776	559.373	549.067	495.014	134.284	670.006	288.909	372.776
ENSG00000151929	BAG3	1619.24	4442.5	232.274	300.757	319.881	22680.5	9037.8	295.663	281.443
ENSG00000175061	SNHG29	2054.97	3017.84	3104.33	2491.92	2382.26	5398.21	1816.63	1506.83	3695.29
ENSG00000049245	VAMP3	1878.45	1302.11	584.277	803.411	977.874	913.13	1530.83	541.799	790.205
ENSG00000186298	PPP1CC	3054.31	3737.83	2347.64	3028.92	3136.38	3598.81	2195.7	2794.54	2568.84
ENSG00000106052	TAX1BP1	2626.91	1807.64	2072.75	1588.26	3202.12	2712.53	2179.44	2167.19	2687.24
ENSG00000166734	CASC4	1336.39	1271.47	941.068	1159.4	1217.65	832.56	1589.02	1009.31	1108.86
ENSG00000113916	BCL6	944.438	1761.68	1227.94	788.559	867.932	2631.96	2755.32	1703.44	617.009
ENSG00000113282	CLINT1	2075.82	1577.85	1947.27	1442.52	2255.74	2860.25	3110.44	2465.11	1956.57
ENSG00000091409	ITGA6	1341.26	995.732	3008.07	723.58	361.869	751.99	1633.51	442.744	873.42
ENSG00000063244	U2AF2	3049.45	3477.4	3096.67	4342.87	3096.05	4122.51	5045.15	7561.17	4664.1
ENSG00000113732	ATP6V0E1	2138.36	2895.28	1015.78	1821.25	2172.87	2242.54	1837.17	1457.3	1359.86
ENSG00000084733	RAB10	3470.59	1348.07	1589.04	2507.7	2653.52	1584.55	3107.87	1774.73	2147.35
ENSG00000109072	VTN	417.666	1087.65	12.9307	8.35436	39.2255	389.423	1962.1	13.5074	8.11854
ENSG00000134108	ARL8B	2418.43	1455.3	1273.44	1267.08	1567.36	4243.37	3579.35	1231.43	1540.49
ENSG00000159674	SPON2	267.556	520.845	119.729	191.686	85.633	322.281	122.364	102.807	157.635
ENSG00000023191	RNH1	2368.39	2205.93	921.433	1498.68	1115.44	751.99	1384.51	1130.87	1070.97
ENSG00000034152	MAP2K3	977.796	2144.65	843.37	1886.23	1576.75	4337.37	4429.05	1301.97	1039.85
ENSG00000116132	PRRX1	537.197	122.552	2.87349	59.8729	27.6236	107.427	17.9695	24.7637	10.8247
ENSG00000165457	FOLR2	52.1213	536.164	0	5.56957	1.65741	107.427	311.471	3.00165	0.676545
ENSG00000211933	IGHV6-1	56.986	0	1.43675	7.4261	2.20989	0	0.855691	26.2645	0.676545
ENSG00000135932	CAB39	3819.45	3477.4	3244.17	3685.2	5870.01	3652.52	3467.26	3487.17	3251.48
ENSG00000095951	HIVEP1	1810.35	796.586	2130.69	1368.72	1462.94	2631.96	2590.18	1292.21	1250.26
ENSG00000079432	CIC	3180.1	1669.77	4208.71	3057.23	1884.48	2229.11	2368.55	6136.13	2644.62
ENSG00000275993	SIK1B	566.385	2941.24	288.786	128.564	313.251	698.276	1642.07	36.0199	68.3311
ENSG00000122641	INHBA	4661.73	91.9138	30.6506	288.69	264.634	335.71	2358.28	13.5074	18.2667
ENSG00000134287	ARF3	2303.07	1731.04	1066.54	2033.82	1681.72	322.281	1596.72	1900.8	1243.49
ENSG00000169871	TRIM56	6465.82	857.862	3486.98	3601.19	2141.38	657.991	2193.99	5274.66	3208.85
ENSG00000214063	TSPAN4	855.485	1118.28	85.2469	77.5099	62.4293	255.139	1119.24	87.048	39.2396
ENSG00000104368	PLAT	363.459	214.465	106.798	65.4425	98.8924	53.7135	271.254	28.5157	27.0618
ENSG00000065154	OAT	631.711	1761.68	567.036	548.603	476.23	4337.37	1205.67	508.781	838.916
ENSG00000108588	CCDC47	1974.36	1394.03	652.283	830.331	1266.82	1074.27	1709.67	963.531	938.368
ENSG00000123240	OPTN	4538.03	4641.64	1805.99	3177.91	4113.15	2188.83	4815.83	4389.17	4054.54
ENSG00000140678	ITGAX	1032.7	551.483	42.6235	364.807	390.045	1007.13	5436.2	300.916	31.7976
ENSG00000142102	PGGHG	2922.27	9742.86	5251.31	4721.14	1295.55	9587.87	10692.7	9890.45	5260.14
ENSG00000100991	TRPC4AP	3178.71	2558.27	2420.44	2970.44	3165.66	1611.41	4204.01	2133.43	2689.94
ENSG00000182809	CRIP2	1016.71	903.819	20.5934	121.138	86.738	255.139	941.26	65.286	94.7164
ENSG00000143924	EML4	4314.26	3845.06	7010.36	4808.4	5520.29	5022.22	5520.06	2754.02	6065.23
ENSG00000171298	GAA	1069.53	704.672	778.716	595.944	433.69	563.992	513.414	341.438	723.227
ENSG00000085224	ATRX	2222.45	1225.52	2909.41	2157.28	3144.11	3115.39	3851.46	7451.61	3961.85
ENSG00000130024	PHF10	2189.1	1593.17	5425.15	2822.38	3204.89	2537.96	3759.9	1861.03	3922.61
ENSG00000134516	DOCK2	2394.11	2726.77	4508.03	5532.91	7227.43	3518.24	1505.16	6548.11	3187.21
ENSG00000136279	DBNL	2264.85	2451.03	2700.6	2834.45	2572.31	993.701	1440.13	4001.21	1833.44
ENSG00000138768	USO1	2592.17	765.948	1202.08	744.466	1311.57	1127.98	1380.23	1369.51	1422.1
ENSG00000142166	IFNAR1	2402.45	674.034	1474.1	1055.43	1324.83	1060.84	1731.92	1776.23	1342.27
ENSG00000184743	ATL3	2907.68	1455.3	1362.99	1388.22	1677.86	886.273	1594.15	964.282	1384.21
ENSG00000215021	PHB2	1757.53	2680.82	1385.02	1651.84	1653.55	2766.25	1857.7	1694.43	1823.97
ENSG00000100934	SEC23A	2189.1	1148.92	1236.08	1118.09	1391.12	980.272	1195.4	724.9	1181.92
ENSG00000159377	PSMB4	1886.79	4365.9	1523.91	2279.35	2605.45	3464.52	2446.42	1890.29	1988.37
ENSG00000105698	USF2	1623.41	3278.26	3332.29	3463.81	2867.33	2108.26	2886.24	3542.7	3683.79
ENSG00000153914	SREK1	1936.13	1608.49	3156.05	1324.63	1834.2	5062.5	3355.16	5122.32	2758.95
ENSG00000054523	KIF1B	1754.75	352.336	830.918	833.115	976.217	765.418	2116.12	516.285	698.871
ENSG00000167779	IGFBP6	1124.43	337.017	3.83132	84.0077	76.241	174.569	1559.07	5.2529	6.76545
ENSG00000165102	HGSNAT	1840.23	1409.34	1034.46	1334.38	938.649	657.991	1574.47	399.971	992.492
ENSG00000198833	UBE2J1	2582.44	1700.4	1129.28	1709.39	1606.03	1665.12	2081.04	3511.19	1161.63
ENSG00000169418	NPR1	1885.4	781.267	1.43675	14.3881	98.3399	120.855	3266.17	33.7686	6.08891
ENSG00000117362	APH1A	1787.41	2037.42	1320.85	1948.42	1636.42	1248.84	1859.42	1837.76	1505.99
ENSG00000137269	LRRC1	653.949	628.077	46.4548	41.3077	39.7779	174.569	1274.12	71.2893	71.0373
ENSG00000138594	TMOD3	2917.4	1531.9	1176.22	1261.97	1741.94	1047.41	3052.25	1012.31	1280.7
ENSG00000067066	SP100	8224.05	2680.82	2711.62	3098.54	3330.85	3759.95	2397.64	6089.61	2744.07
ENSG00000169967	MAP3K2	3171.76	1976.15	2847.15	1937.75	2365.68	6781.33	4740.53	3508.18	2657.47
ENSG00000091592	NLRP1	3032.77	3661.23	8869.99	6149.27	4914.23	3249.67	3718.83	4555.76	6743.8
ENSG00000162613	FUBP1	3611.66	2282.53	5351.4	3345.92	3873.38	4874.5	2775.86	2590.43	3937.49
ENSG00000119396	RAB14	2401.75	2834.01	1801.2	1960.95	2040.83	2699.11	2059.65	1959.33	2010.02
ENSG00000130202	NECTIN2	2241.22	612.758	7.18373	58.0164	136.46	214.854	1094.43	21.0116	10.1482
ENSG00000132155	RAF1	2223.84	1899.55	2919.95	2628.84	2343.58	2685.68	3619.57	2973.89	2838.78
ENSG00000115464	USP34	3389.28	965.094	4903.13	2676.18	2938.59	4619.36	3949.87	7812.56	4888.72
ENSG00000156273	BACH1	4307.31	2466.35	1041.16	1048.01	1970.11	7170.76	4180.9	1304.22	3126.32
ENSG00000170873	MTSS1	888.842	214.465	183.903	284.977	187.288	993.701	482.609	1194.66	230.025
ENSG00000072786	STK10	3168.28	3967.61	4493.18	6184.55	4612.58	4659.65	5202.6	6836.27	5077.47
ENSG00000145901	TNIP1	4936.24	3569.32	2576.56	5611.35	6894.84	5196.79	5910.25	4164.8	4731.76
ENSG00000196954	CASP4	2833.32	2098.7	932.927	1339.48	1565.15	1584.55	1848.29	1052.83	1146.74
ENSG00000102760	RGCC	765.141	9313.93	503.819	1287.5	530.372	1987.4	2084.46	1127.87	991.139
ENSG00000173482	PTPRM	633.1	137.871	208.807	192.614	66.849	0	122.364	234.129	462.08
ENSG00000019169	MARCO	82.0042	30.6379	0	30.6327	92.2627	819.132	150.602	2.25124	5.41236
ENSG00000244754	N4BP2L2	3380.94	1470.62	6422.73	3033.1	3709.29	2175.4	2761.31	3908.91	4158.72
ENSG00000171314	PGAM1	4654.78	2650.18	863.484	2164.24	2092.21	1342.84	1882.52	1531.59	917.396
ENSG00000008710	PKD1	1950.73	719.991	2829.91	2344.79	1271.24	698.276	1796.09	1849.77	2163.59
ENSG00000102054	RBBP7	1685.26	2006.78	1499.48	2234.33	3267.87	1893.4	2615.85	1793.49	1632.5
ENSG00000169594	BNC1	1424.65	719.991	4.78915	12.0674	51.3798	644.563	1956.96	4.50248	2.70618
ENSG00000055208	TAB2	3742.31	3171.02	7060.65	5125.86	6846.78	6069.63	6648.72	5640.11	4534.88
ENSG00000084112	SSH1	1988.25	1118.28	2122.55	3870.85	3969.51	913.13	1826.04	2980.64	2056.7
ENSG00000198682	PAPSS2	813.093	137.871	101.051	87.2566	153.587	134.284	1130.37	128.321	56.1533
ENSG00000081154	PCNP	3046.67	3293.58	3234.11	2846.98	3809.29	3625.66	3051.39	2176.2	3784.59
ENSG00000104964	AES	5274.68	5591.42	4423.74	6322.86	4870.59	1853.12	2835.76	5769.18	6055.76
ENSG00000116574	RHOU	151.499	428.931	26.3403	36.6664	60.7718	201.426	321.74	15.7587	6.08891
ENSG00000175582	RAB6A	2775.63	2297.84	1696.8	2085.81	2330.32	1181.7	1894.5	1380.01	2070.91
ENSG00000095794	CREM	2397.58	13710.5	1772.94	2381.46	3282.23	2323.11	5318.97	422.483	1039.17
ENSG00000101199	ARFGAP1	1935.44	1317.43	1758.58	1808.72	1637.52	1571.12	3347.46	1676.42	1767.14
ENSG00000147010	SH3KBP1	2299.59	2680.82	1838.56	3299.04	3709.29	2430.54	2610.71	4388.42	3068.13
ENSG00000139182	CLSTN3	2187.01	2650.18	1172.86	2123.4	1580.07	1101.13	3274.73	2374.31	1304.38
ENSG00000152484	USP12	1630.36	1991.46	1505.71	1722.85	2248.56	7479.61	6817.29	1859.53	1413.98
ENSG00000140612	SEC11A	1624.8	2114.02	804.578	1276.82	1304.38	1638.26	1707.96	850.969	1089.24
ENSG00000138759	FRAS1	924.98	1608.49	1.43675	11.6033	35.9106	147.712	2437.86	6.00331	9.47164
ENSG00000120694	HSPH1	2193.96	31449.8	1271.04	1246.66	2322.59	159771	23981.6	1945.07	2729.86
ENSG00000048707	VPS13D	2818.72	1011.05	4570.29	2855.33	2390.54	1033.99	1724.22	4273.61	4170.9
ENSG00000060718	COL11A1	26.4081	643.396	1.43675	9.74675	1.65741	0	18.8252	6.75372	31.7976
ENSG00000173039	RELA	4258.66	2895.28	3082.3	3219.68	2667.88	3343.67	5596.22	2689.48	2559.37
ENSG00000133142	TCEAL4	709.545	827.224	135.533	270.124	274.026	241.711	374.792	192.106	340.302
ENSG00000103966	EHD4	2913.23	1608.49	646.536	1053.58	1134.78	765.418	2074.19	658.863	428.93
ENSG00000188612	SUMO2	1449.67	3554	1060.8	1936.82	2519.27	2255.97	1732.77	1684.68	1911.24
ENSG00000161547	SRSF2	2179.37	8961.59	3128.75	3034.95	3195.49	10715.9	3768.46	3661.27	4124.22
ENSG00000026950	BTN3A1	4342.05	3033.15	4008.52	4379.54	3433.61	1007.13	2389.94	2182.2	4842.04
ENSG00000254087	LYN	3852.81	444.25	56.512	316.537	357.449	2067.97	1495.75	1772.48	122.455
ENSG00000145362	ANK2	65.3254	153.19	3.35241	7.89023	3.8673	13.4284	7.70121	6.00331	1.35309
ENSG00000007202	KIAA0100	2121.69	1485.94	2787.29	3047.02	2344.14	1826.26	3339.76	3899.15	2945
ENSG00000168488	ATXN2L	3674.21	2389.76	4303.05	5244.22	3952.38	4793.93	5291.59	4468.71	3844.81
ENSG00000172137	CALB2	519.128	536.164	1.43675	58.4805	66.2966	402.852	1752.45	3.00165	0.676545
ENSG00000115183	TANC1	1079.26	382.974	3.83132	19.0294	34.8057	93.9987	522.827	31.5174	6.08891
ENSG00000198805	PNP	824.907	949.776	129.786	333.246	292.81	3800.23	1743.04	780.43	419.458
ENSG00000162496	DHRS3	2577.57	949.776	1095.76	699.91	550.814	469.994	1585.59	204.113	393.073
ENSG00000152102	FAM168B	2562.98	2221.25	3125.4	2971.83	2738.05	2739.39	2862.28	3598.23	3219.68
ENSG00000115762	PLEKHB2	2182.84	3002.52	2534.42	2515.59	3098.26	4109.09	4184.33	1515.09	1874.71
ENSG00000108582	CPD	1037.56	949.776	920.954	739.825	1351.34	1114.56	2531.99	595.829	1003.99
ENSG00000108219	TSPAN14	2024.39	2282.53	3551.64	3784.06	3119.25	1584.55	3536.57	6072.35	2765.04
ENSG00000143612	C1orf43	2016.05	3063.79	1234.64	1765.09	1851.88	1893.4	1573.61	1740.21	2067.52
ENSG00000141867	BRD4	2668.61	1930.19	3365.82	2735.12	2298.28	3988.23	4299.84	6373.26	2448.42
ENSG00000101384	JAG1	1093.85	275.741	10.0572	50.1262	28.7285	107.427	394.473	13.5074	12.1778
ENSG00000164125	GASK1B	414.886	168.509	3.35241	27.8479	40.8829	120.855	161.726	4.50248	8.11854
ENSG00000114861	FOXP1	1421.17	2236.57	3345.7	2358.71	2700.48	5035.64	3711.99	4149.04	3554.57
ENSG00000150782	IL18	734.563	980.413	4.78915	15.3163	11.0494	496.85	1339.16	9.75538	5.41236
ENSG00000148700	ADD3	2178.67	1348.07	4341.85	2457.57	2801.03	2188.83	1789.25	2548.41	5333.88
ENSG00000122884	P4HA1	4925.12	1302.11	334.762	983.03	688.932	2658.82	1737.91	270.149	404.574
ENSG00000031698	SARS	2000.76	1822.96	1889.8	2616.31	2370.65	1409.98	2140.94	1985.59	2938.24
ENSG00000164104	HMGB2	771.396	7383.74	1206.87	1791.55	1571.78	2014.26	2605.58	1695.94	2595.23
ENSG00000176788	BASP1	2086.94	689.353	35.4397	235.314	383.968	2846.82	2112.7	685.128	60.2125
ENSG00000064601	CTSA	876.333	1470.62	805.535	1636.06	1556.86	1289.13	818.896	1189.41	951.899
ENSG00000014216	CAPN1	2186.32	2052.74	1337.13	2589.85	2166.79	845.988	1788.39	2603.19	1625.06
ENSG00000101938	CHRDL1	42.392	459.569	1.43675	7.89023	46.9601	26.8568	34.2276	0.750414	2.70618
ENSG00000124151	NCOA3	3686.02	1363.39	5365.77	3532.5	4681.09	7358.76	3867.72	9096.52	3627.64
ENSG00000126012	KDM5C	3333.68	2941.24	3031.53	3473.56	2704.35	4901.36	4537.73	4493.48	3530.21
ENSG00000119777	TMEM214	1856.21	536.164	837.623	1238.77	1077.87	845.988	1612.12	1208.92	872.744
ENSG00000070614	NDST1	1146.67	199.146	7.66264	78.9023	116.019	53.7135	201.943	257.392	11.5013
ENSG00000117450	PRDX1	1948.64	2895.28	524.891	1383.11	1717.63	3034.82	2559.37	1583.37	1162.3
ENSG00000101972	STAG2	3930.64	1485.94	3715.9	2219.47	2977.27	5129.64	3259.33	5507.29	4239.91
ENSG00000010322	NISCH	2585.22	1960.83	4863.86	4460.76	2603.8	2618.54	3570.8	3427.14	4641.1
ENSG00000104774	MAN2B1	1476.77	1271.47	858.216	1373.36	1961.27	2041.11	1263.85	1416.78	948.517
ENSG00000234741	GAS5	2553.95	5729.29	3408.92	2693.82	2633.63	15133.8	2558.51	2489.87	5392.07
ENSG00000101265	RASSF2	726.919	1669.77	566.557	1279.15	1093.89	4753.65	1507.73	2171.7	533.794
ENSG00000196504	PRPF40A	3202.33	1210.2	2669.47	1630.96	2797.71	5075.93	2942.72	2904.1	3545.1
ENSG00000143545	RAB13	811.008	551.483	9.5783	77.974	185.63	40.2852	354.256	138.076	18.9433
ENSG00000101182	PSMA7	1797.14	4059.52	1191.06	2120.15	2511.53	1839.69	2656.92	1892.54	2175.77
ENSG00000196712	NF1	3066.12	965.094	1604.84	1328.34	1574.54	1759.12	1635.22	5814.21	2187.27
ENSG00000111011	RSRC2	2387.16	3921.65	2784.89	1790.62	2201.6	11723	4080.79	2682.73	3616.13
ENSG00000111229	ARPC3	1697.07	4243.35	964.056	1913.61	2569.54	2591.68	1312.63	1431.04	1196.81
ENSG00000197535	MYO5A	1576.15	1455.3	2289.21	2094.62	2189.44	1423.41	2721.1	1990.1	2520.13
ENSG00000108861	DUSP3	1599.78	796.586	304.111	520.291	399.989	913.13	896.764	278.403	361.952
ENSG00000225614	ZNF469	240.453	0	67.0481	147.594	111.599	0	135.199	134.324	50.7409
ENSG00000133313	CNDP2	2868.06	1623.81	1687.7	2542.05	2136.41	1906.83	1561.64	2519.14	1809.08
ENSG00000113645	WWC1	1672.05	1102.97	27.7771	77.5099	240.325	725.133	3150.65	96.8034	23.0025
ENSG00000089248	ERP29	1198.1	2680.82	2044.97	2251.5	1583.38	3048.24	1731.92	1802.49	3112.79
ENSG00000119689	DLST	1846.48	1853.59	1958.28	2053.32	1732	2054.54	3024.01	1709.44	2129.76
ENSG00000139641	ESYT1	3190.52	2834.01	2697.25	5218.23	3285.55	819.132	2227.36	5419.49	3322.51
ENSG00000174695	TMEM167A	1549.05	1179.56	1044.51	833.579	1517.09	1208.55	1620.68	984.543	1259.05
ENSG00000110906	KCTD10	1385.04	750.629	753.334	1069.36	1033.67	1020.56	1328.03	866.728	854.477
ENSG00000116350	SRSF4	2672.78	1976.15	2877.32	2669.22	2818.71	2887.1	3752.2	4338.14	2494.42
ENSG00000134644	PUM1	2499.74	1715.72	2836.14	2457.11	2075.63	3786.8	2977.8	3123.22	2739.33
ENSG00000197111	PCBP2	1817.99	4948.02	1872.08	2222.26	1973.43	12005	2577.34	2381.81	2359.79
ENSG00000198856	OSTC	1615.07	1455.3	513.397	677.631	853.016	980.272	1357.13	274.651	600.096
ENSG00000197930	ERO1A	5984.22	1072.33	2083.28	1850.95	2220.93	1275.7	1486.33	1374.01	1852.38
ENSG00000153147	SMARCA5	4673.55	2558.27	2930.96	2253.36	3021.47	4619.36	2794.69	2739.76	3479.47
ENSG00000088930	XRN2	1787.41	1945.51	2253.3	1720.07	2194.42	2846.82	1846.58	2301.52	1826.67
ENSG00000091317	CMTM6	2367	2451.03	5994.58	4647.81	7719.13	3236.24	2356.57	2345.79	1798.26
ENSG00000184588	PDE4B	3586.64	5116.53	9860.39	5178.31	3738.57	2551.39	8681.84	1684.68	1671.74
ENSG00000184787	UBE2G2	2688.07	1792.32	3455.37	2539.26	2772.3	2403.68	2607.29	2493.62	2501.19
ENSG00000143772	ITPKB	2329.48	2742.09	3475.97	4106.17	2831.42	3155.67	5203.45	7666.98	4455.05
ENSG00000243566	UPK3B	1815.21	5668.02	24.9036	17.637	16.0217	590.849	2256.46	10.5058	12.1778
ENSG00000116171	SCP2	1155.7	1409.34	925.264	1128.3	1594.98	805.703	959.229	420.232	878.156
ENSG00000188313	PLSCR1	6428.99	1011.05	460.716	542.569	451.369	577.421	604.973	192.856	231.379
ENSG00000253276	CCDC71L	4487.99	520.845	352.482	595.48	1284.5	644.563	9371.52	378.209	244.233
ENSG00000109787	KLF3	1769.35	1194.88	1746.6	1159.4	680.645	1705.41	2017.72	1993.1	2855.02
ENSG00000088387	DOCK9	1763.79	689.353	2124.47	1237.37	1370.13	1114.56	1328.89	1476.06	1685.95
ENSG00000115641	FHL2	2578.27	781.267	25.3825	142.024	163.531	469.994	793.225	44.2744	15.5605
ENSG00000198752	CDC42BPB	1598.39	321.698	111.587	179.155	195.575	765.418	834.298	426.985	84.5682
ENSG00000130303	BST2	7053.06	2742.09	365.891	1310.24	926.494	1450.27	1856.85	801.442	587.241
ENSG00000065882	TBC1D1	1483.72	1363.39	840.975	1140.37	716.003	1074.27	1303.22	2072.64	616.333
ENSG00000187239	FNBP1	3432.36	4381.22	4230.74	6792.56	6176.08	8379.31	5647.56	7462.86	4890.07
ENSG00000065135	GNAI3	2731.85	1531.9	1344.79	1737.71	1782.82	1973.97	2868.27	1375.51	1324
ENSG00000113384	GOLPH3	1871.5	2803.37	1542.11	2282.13	2101.05	1101.13	2011.73	1599.13	1391.65
ENSG00000118971	CCND2	3745.79	7337.78	2904.14	4678.44	4894.34	5989.06	2732.22	2170.95	2340.85
ENSG00000189091	SF3B3	2904.9	1899.55	3525.29	4325.7	3175.6	2323.11	3154.93	3559.96	3288.01
ENSG00000110841	PPFIBP1	1587.27	153.19	107.756	124.851	210.492	389.423	170.282	171.094	121.778
ENSG00000162368	CMPK1	2341.99	2435.71	3345.22	2653.9	3143.01	2363.4	2126.39	2387.82	3861.72
ENSG00000196154	S100A4	1266.2	13312.2	730.825	5635.02	7437.92	2229.11	983.188	9767.39	3508.56
ENSG00000211637	IGLV4-69	117.447	0	0	7.89023	0	26.8568	0.855691	106.559	1.35309
ENSG00000164190	NIPBL	2211.33	1011.05	3141.68	1721.46	1782.82	5062.5	4285.3	4410.93	4358.98
ENSG00000137462	TLR2	1574.06	107.233	87.1626	91.898	214.911	228.283	871.093	69.7885	44.652
ENSG00000186716	BCR	1057.72	980.413	930.053	1113.91	753.571	819.132	3126.69	1566.11	792.911
ENSG00000115216	NRBP1	2357.27	2665.5	1863.94	2722.59	2356.29	2618.54	2782.71	2303.02	2323.93
ENSG00000276775	IGHV4-4	44.4769	0	0	0	0	93.9987	2.56707	90.8001	0
ENSG00000184863	RBM33	2490.01	1424.66	3674.72	2886.9	2482.81	4015.09	3292.7	4531.75	4061.3
ENSG00000163938	GNL3	924.285	1777	1069.9	782.525	1262.4	4417.94	1855.14	1458.05	1288.14
ENSG00000188643	S100A16	607.387	413.612	7.66264	103.965	63.5342	107.427	659.737	4.50248	5.41236
ENSG00000102158	MAGT1	2011.19	1761.68	813.198	1182.14	1332.56	926.559	1547.94	644.605	752.995
ENSG00000052795	FNIP2	456.583	291.06	297.885	239.956	317.671	577.421	2011.73	124.569	223.26
ENSG00000102580	DNAJC3	1823.55	1455.3	709.273	659.066	1157.43	1973.97	2699.7	927.511	626.481
ENSG00000125977	EIF2S2	2730.46	1562.53	1134.07	1301.42	2034.2	1409.98	1549.66	1554.86	1949.8
ENSG00000136436	CALCOCO2	2292.64	1394.03	1578.5	1596.61	1962.38	1154.84	1601	1617.14	1471.49
ENSG00000121892	PDS5A	2829.84	2313.16	4026.24	2047.75	3393.83	3827.09	3129.26	3860.13	3662.14
ENSG00000166226	CCT2	2558.81	2236.57	1314.14	1478.72	1975.08	7117.04	2874.26	1861.78	1657.54
ENSG00000136048	DRAM1	2334.34	398.293	58.9066	163.374	383.968	550.564	4756.78	235.63	52.094
ENSG00000196141	SPATS2L	3795.13	1179.56	385.527	721.724	926.494	402.852	1304.07	174.846	246.939
ENSG00000112739	PRPF4B	2881.27	2282.53	4270.97	2216.69	3088.87	5008.79	4443.6	5685.13	5620.74
ENSG00000137312	FLOT1	1811.04	1593.17	1645.55	1410.96	1543.6	523.707	1253.59	1120.37	912.66
ENSG00000025293	PHF20	1072.31	1501.26	1217.88	1033.16	1056.88	2067.97	1149.19	1202.91	1240.78
ENSG00000174282	ZBTB4	2378.82	2343.8	4541.07	4548.48	2449.11	1342.84	3198.57	4041.73	3312.37
ENSG00000165030	NFIL3	1105.67	1011.05	96.7409	136.455	171.819	993.701	1365.68	75.7918	62.2422
ENSG00000163714	U2SURP	3877.13	1164.24	4359.57	1802.69	3171.19	4565.65	3237.08	2372.81	3869.84
ENSG00000111319	SCNN1A	41.0021	1148.92	3.35241	1.85652	4.41977	0	1891.08	3.00165	8.79509
ENSG00000009954	BAZ1B	2761.04	1041.69	3193.41	2778.75	2910.97	3128.81	3345.75	4871.69	3585.69
ENSG00000107551	RASSF4	131.346	337.017	24.9036	60.8012	40.8829	161.141	263.553	52.529	19.6198
ENSG00000171206	TRIM8	2961.19	1363.39	736.572	1331.59	890.031	939.987	2342.02	1926.31	1125.77
ENSG00000020181	ADGRA2	99.378	45.9569	5.26807	14.8522	6.62966	0	19.6809	7.50414	8.79509
ENSG00000123146	ADGRE5	1859.69	8241.6	3038.72	4359.12	2311.54	3182.53	6074.55	2453.85	2379.41
ENSG00000108091	CCDC6	1275.93	2359.12	987.523	873.495	1698.3	3128.81	1689.13	727.151	675.869
ENSG00000177374	HIC1	637.965	291.06	152.295	427.929	207.729	67.1419	434.691	67.5372	43.9754
ENSG00000196961	AP2A1	1600.47	1164.24	1108.21	1453.19	1301.62	496.85	1289.53	1410.03	1271.23
ENSG00000167244	IGF2	176.518	413.612	1.43675	10.2109	9.94448	0	40.2175	3.75207	0.676545
ENSG00000159202	UBE2Z	3918.13	2742.09	1776.3	2752.76	2618.71	3719.66	4091.91	3267.3	2491.72
ENSG00000010404	IDS	3603.32	6066.31	8076.43	7845.21	6619.71	11508.1	8891.48	5786.44	7390.58
ENSG00000089327	FXYD5	2529.62	5974.39	5623.9	5236.33	4071.16	4041.94	2813.51	2762.27	4697.25
ENSG00000129625	REEP5	1512.21	1639.13	1198.72	1676.91	1667.91	899.702	1115.82	1772.48	1205.6
ENSG00000099995	SF3A1	2369.09	4120.8	3741.29	4770.8	3587.2	2497.68	2671.47	3373.11	3329.28
ENSG00000068305	MEF2A	1293.3	367.655	558.894	387.549	475.125	1853.12	722.203	1379.26	595.36
ENSG00000154845	PPP4R1	1587.96	719.991	753.334	1010.88	1238.09	778.846	2059.65	936.516	737.434
ENSG00000123933	MXD4	1051.46	2696.14	1251.88	2032.89	1552.44	1517.41	3787.29	2933.37	1485.69
ENSG00000109180	OCIAD1	2148.09	2068.06	1844.3	1559.48	1939.17	2161.97	1635.22	1704.94	1894.33
ENSG00000116786	PLEKHM2	1972.27	1286.79	1418.07	1675.98	1400.51	2739.39	2970.96	1581.87	1225.9
ENSG00000163975	MELTF	2369.09	398.293	10.0572	52.9109	211.596	93.9987	2290.68	64.5356	8.11854
ENSG00000173744	AGFG1	2245.39	2068.06	2258.56	1867.2	2752.41	2873.67	2728.8	1957.08	1575.67
ENSG00000119729	RHOQ	771.396	765.948	319.436	197.72	306.069	711.704	567.323	389.465	336.243
ENSG00000102699	PARP4	2817.33	965.094	2225.04	2259.85	2339.72	617.706	1174.01	2909.35	3485.56
ENSG00000113070	HBEGF	870.079	428.931	25.8614	145.737	370.156	711.704	691.398	59.2827	22.326
ENSG00000182446	NPLOC4	2202.99	1792.32	2322.74	2607.49	2138.62	1718.83	2290.68	2552.16	2137.88
ENSG00000114554	PLXNA1	2068.87	398.293	1019.13	1158.94	1676.2	1638.26	3535.71	1447.55	960.694
ENSG00000069020	MAST4	1628.97	1179.56	1725.53	2073.27	1752.99	913.13	2649.22	1385.26	820.65
ENSG00000135842	FAM129A	1973.66	1960.83	1709.73	5465.14	7811.39	1141.41	5864.05	2345.79	2610.11
ENSG00000104332	SFRP1	79.2244	61.2758	0.478915	3.24892	2.76236	0	303.77	2.25124	3.38273
ENSG00000157540	DYRK1A	2795.79	2374.44	4624.88	3243.35	2915.39	4874.5	3957.57	3968.19	3486.91
ENSG00000149428	HYOU1	2452.48	1164.24	1025.84	1990.19	2536.4	993.701	3314.09	1569.87	1506.67
ENSG00000183722	LHFPL6	205.706	168.509	7.18373	34.3457	27.0711	187.997	112.951	14.2579	18.9433
ENSG00000117394	SLC2A1	3279.47	1608.49	533.99	1066.11	587.829	2618.54	2233.35	1782.23	801.03
ENSG00000145824	CXCL14	16.6788	107.233	0	3.24892	1.65741	80.5703	58.187	0.750414	4.05927
ENSG00000168175	MAPK1IP1L	1711.66	5407.59	1849.57	1963.27	2310.43	4028.52	2337.75	2431.34	1646.71
ENSG00000282639	IGHV3-64D	93.1234	0	0	1.85652	0	0	0	0	0
ENSG00000185825	BCAP31	2426.77	2803.37	1006.2	1825.43	2020.39	1906.83	1985.2	1385.26	1411.27
ENSG00000123104	ITPR2	1876.37	382.974	1587.6	1073.54	1365.16	590.849	1144.91	1308.72	1164.33
ENSG00000169223	LMAN2	1513.6	2221.25	986.086	1552.05	1766.8	926.559	1350.28	1163.14	1276.64
ENSG00000115758	ODC1	1640.78	6096.95	930.532	2106.23	1948.57	8701.59	6961.9	1022.06	2445.03
ENSG00000175115	PACS1	3649.88	2680.82	3892.62	5704.64	3489.96	1047.41	3907.08	4738.11	3872.55
ENSG00000148848	ADAM12	1222.42	122.552	61.3011	442.317	387.282	120.855	40.2175	84.0463	60.8891
ENSG00000124357	NAGK	1530.28	1256.15	1340	1664.84	1574.54	939.987	1411.89	2133.43	1285.44
ENSG00000129667	RHBDF2	1808.26	321.698	412.346	557.886	335.903	2443.97	2646.65	1777.73	404.574
ENSG00000198663	C6orf89	1585.18	965.094	2231.27	2535.55	2274.52	537.135	1124.38	1747.71	2079.02
ENSG00000203485	INF2	4181.52	1194.88	1504.27	1545.56	1097.76	1477.12	2424.17	3717.55	2162.92
ENSG00000211970	IGHV4-61	72.9699	15.319	0.95783	1.39239	0	13.4284	0.855691	19.5108	0.676545
ENSG00000197448	GSTK1	2082.07	3768.46	3693.87	3224.78	3107.1	1047.41	1140.64	4206.07	3995.68
ENSG00000118564	FBXL5	1827.72	1409.34	1492.3	1558.55	1727.03	1033.99	1082.45	1080.6	1395.04
ENSG00000117500	TMED5	2588.69	1455.3	1623.04	1450.87	2260.71	2846.82	3729.95	1800.24	2080.38
ENSG00000055917	PUM2	3356.61	2068.06	5368.64	3948.36	4813.68	3397.38	3439.88	5418.74	5210.08
ENSG00000241294	IGKV2-24	147.33	0	0.95783	3.24892	1.10494	0	0	64.5356	2.70618
ENSG00000179195	ZNF664	1312.76	1593.17	1337.61	1375.22	1499.96	1329.41	3001.76	1323.73	1633.18
ENSG00000101773	RBBP8	415.581	183.828	69.9216	139.239	730.919	1087.7	3349.17	302.417	117.719
ENSG00000120549	KIAA1217	1445.5	199.146	10.0572	88.649	30.9384	268.568	769.266	9.75538	14.884
ENSG00000196616	ADH1B	121.616	45.9569	0	2.78479	0	0	13.691	0	4.73582
ENSG00000142627	EPHA2	4001.53	796.586	4.78915	71.4762	126.516	308.853	5469.57	17.2595	6.08891
ENSG00000206384	COL6A6	19.4586	0	9.09939	3.71305	1.10494	13.4284	10.2683	2.25124	4.05927
ENSG00000141503	MINK1	2724.9	1822.96	2859.12	3280.48	2846.88	1463.69	3556.25	5889.25	3476.09
ENSG00000111371	SLC38A1	4506.06	3967.61	9673.61	6470.45	6852.3	12515.3	8843.56	13544.2	13075.6
ENSG00000117713	ARID1A	3091.84	1761.68	4888.29	4463.08	2926.44	2188.83	2904.21	5445	3621.55
ENSG00000085832	EPS15	2396.89	1930.19	1998.51	2176.77	3021.47	2027.69	1330.6	2518.39	2106.76
ENSG00000137177	KIF13A	1124.43	260.422	17.7199	78.9023	161.874	631.134	1188.55	104.308	15.5605
ENSG00000146072	TNFRSF21	403.072	91.9138	7.18373	52.9109	111.599	147.712	376.504	5.2529	0
ENSG00000156052	GNAQ	1473.3	628.077	1673.81	651.64	1488.91	671.419	1139.78	332.433	407.28
ENSG00000100100	PIK3IP1	2742.28	7092.68	7561.59	6791.63	4631.92	2457.39	5293.3	3737.81	9150.28
ENSG00000115956	PLEK	565.69	796.586	56.512	425.608	183.973	2981.1	1710.53	977.039	127.191
ENSG00000134440	NARS	2584.52	1731.04	1666.62	1875.55	2424.8	2443.97	1618.97	2153.69	2345.58
ENSG00000143341	HMCN1	86.1739	15.319	112.066	75.6534	39.2255	13.4284	21.3923	157.587	137.339
ENSG00000125772	GPCPD1	1669.27	3324.21	3907.95	2016.65	2037.51	3437.67	2725.37	945.521	2645.29
ENSG00000131669	NINJ1	1515.69	2742.09	315.126	764.424	1097.76	1396.55	1547.94	309.921	315.947
ENSG00000146535	GNA12	1028.53	965.094	857.258	1560.87	1286.71	980.272	1960.39	1165.39	726.61
ENSG00000108950	FAM20A	322.457	76.5948	125.476	90.9697	81.2133	214.854	462.073	109.56	80.5089
ENSG00000142910	TINAGL1	542.757	214.465	0.478915	8.81849	16.0217	13.4284	227.614	6.00331	2.70618
ENSG00000084652	TXLNA	2510.16	1087.65	1302.17	2029.65	1806.58	1960.54	2286.41	2395.32	2027.61
ENSG00000099917	MED15	2622.75	1945.51	4520.96	3084.15	2420.38	2296.25	3455.28	4624.8	3758.21
ENSG00000107104	KANK1	1371.83	214.465	404.204	160.589	140.88	40.2852	930.991	70.5389	188.08
ENSG00000117616	RSRP1	3262.8	6525.88	2278.68	2638.12	2865.67	6365.05	3439.02	2962.63	5576.09
ENSG00000068878	PSME4	1710.27	2098.7	3543.49	1934.5	2545.79	5478.78	3184.88	2146.93	1992.43
ENSG00000088766	CRLS1	549.011	1394.03	400.852	509.152	549.709	537.135	900.186	369.204	395.102
ENSG00000110079	MS4A4A	198.061	245.103	1.43675	22.2783	25.9661	93.9987	201.943	0.750414	5.41236
ENSG00000166747	AP1G1	2620.66	1501.26	2814.11	2009.22	2592.75	5089.36	2714.25	3289.81	2367.91
ENSG00000089351	GRAMD1A	2360.75	2205.93	2917.55	2765.29	2024.25	738.561	3611.01	2528.14	3074.9
ENSG00000124155	PIGT	826.992	2236.57	754.77	1022.48	1139.2	1369.7	1452.96	787.184	809.825
ENSG00000100403	ZC3H7B	1877.06	1348.07	2075.62	2317.41	1887.24	1289.13	2214.53	1916.56	1609.5
ENSG00000166927	MS4A7	733.173	260.422	4.78915	42.2359	237.563	93.9987	610.963	30.0165	12.1778
ENSG00000125970	RALY	1672.05	3783.78	1544.98	2301.63	1804.92	2658.82	2149.49	1828.01	1749.55
ENSG00000178980	SELENOW	1079.26	2451.03	631.689	852.145	847.491	1221.98	1303.22	601.832	918.072
ENSG00000183696	UPP1	3045.97	2650.18	2636.43	2371.71	1921.5	2202.26	3991.8	366.202	1252.29
ENSG00000012817	KDM5D	2697.8	321.698	3947.7	3552	2799.37	201.426	2262.45	2690.23	4097.16
ENSG00000189043	NDUFA4	981.966	3216.98	661.861	1195.6	1547.47	966.844	789.802	584.572	780.733
ENSG00000100241	SBF1	3093.23	3492.72	7354.22	8688.53	4509.27	2739.39	6839.53	11147.4	6800.63
ENSG00000062485	CS	1793.67	2343.8	1728.88	2514.66	2657.39	3357.1	2147.78	2899.6	1844.94
ENSG00000160213	CSTB	1282.88	1516.58	422.403	1029.91	1071.24	913.13	1505.16	462.255	597.39
ENSG00000111145	ELK3	1577.54	919.138	1525.34	1493.11	1622.06	2054.54	1535.96	1289.96	1190.04
ENSG00000101109	STK4	3671.43	3508.04	5784.82	5595.1	4923.62	6794.76	9728.35	10968.8	8472.38
ENSG00000114416	FXR1	2711	2405.08	1834.25	1306.06	1896.08	9561.01	3579.35	1683.93	2240.04
ENSG00000158985	CDC42SE2	4021.68	6081.63	7471.56	7765.84	8848.93	6714.19	6619.62	7272.26	7711.26
ENSG00000137776	SLTM	3467.81	1899.55	2741.79	1792.47	2599.38	3706.23	2935.87	4258.6	3091.81
ENSG00000026103	FAS	1726.26	2451.03	1180.53	1967.45	4298.23	1557.69	4281.02	2416.33	1545.91
ENSG00000162521	RBBP4	2476.81	2175.29	2154.64	2641.83	2735.29	1557.69	2186.29	2818.55	2611.47
ENSG00000204843	DCTN1	1833.28	1057.01	1503.79	2329.47	2080.61	819.132	1638.65	1942.07	1798.26
ENSG00000172115	CYCS	1601.86	7337.78	830.439	1197.92	1752.99	2819.96	2712.54	1227.68	1137.95
ENSG00000118217	ATF6	1207.82	735.31	976.029	856.786	1154.66	1275.7	772.689	712.893	711.726
ENSG00000005022	SLC25A5	790.159	3737.83	502.382	1074	1399.96	4350.8	1775.56	1665.17	868.008
ENSG00000169567	HINT1	2118.21	4427.18	1576.11	1934.96	2843.02	3894.23	2038.25	1779.23	2339.49
ENSG00000165629	ATP5F1C	1132.77	2405.08	977.466	1405.39	1829.23	1289.13	940.404	1009.31	1088.56
ENSG00000114120	SLC25A36	2205.08	1562.53	2067.96	913.874	1188.37	2927.39	1268.13	1058.08	1857.79
ENSG00000157020	SEC13	1241.88	965.094	798.352	1018.3	1108.81	1087.7	1547.94	783.432	774.644
ENSG00000140262	TCF12	1225.89	796.586	1203.51	1016.91	1462.94	1181.7	1216.79	1595.38	1238.75
ENSG00000136731	UGGT1	1725.56	1057.01	2426.18	1799.44	2220.93	1262.27	1837.17	2328.53	1982.95
ENSG00000204472	AIF1	179.992	260.422	14.8464	23.6707	53.0372	617.706	287.512	3.00165	8.11854
ENSG00000221955	SLC12A8	79.9194	137.871	6.2259	10.675	36.4631	80.5703	54.7642	54.0298	8.79509
ENSG00000135766	EGLN1	3882	1547.21	1106.77	1676.91	1661.83	1624.83	3101.88	973.287	1249.58
ENSG00000116584	ARHGEF2	2603.29	1547.21	2113.45	2608.88	2197.18	4485.08	4838.93	3791.09	2016.11
ENSG00000062194	GPBP1	3755.52	3492.72	2792.55	1803.61	2962.9	22130	6069.41	3038.43	3271.1
ENSG00000137710	RDX	1296.08	444.25	385.527	369.912	932.572	563.992	977.199	381.21	465.463
ENSG00000172845	SP3	3173.84	2282.53	3654.12	2509.09	2991.63	2269.4	2619.27	3876.64	3411.14
ENSG00000136603	SKIL	2241.91	2282.53	3443.4	1649.52	1909.34	15281.5	6859.22	1252.44	914.013
ENSG00000105397	TYK2	2868.76	2129.34	3115.82	3727.9	3442.45	2336.54	3024.01	4170.05	3553.22
ENSG00000112893	MAN2A1	1494.84	1317.43	1717.87	1306.53	1190.02	2564.82	2385.67	1679.43	1619.65
ENSG00000159346	ADIPOR1	1743.63	2420.4	1073.25	1494.5	1602.17	1879.97	1695.98	1614.89	1715.72
ENSG00000111269	CREBL2	949.303	2144.65	1212.13	1396.57	1559.63	416.28	1313.48	1193.91	1816.52
ENSG00000184232	OAF	169.568	61.2758	18.1988	30.1685	27.0711	26.8568	91.5589	9.00496	4.73582
ENSG00000133392	MYH11	5.55961	0	1.43675	0.928262	0.552471	0	3.42276	0	3.38273
ENSG00000166128	RAB8B	3993.88	3324.21	1517.68	1785.98	2822.58	4914.79	3657.22	2271.5	2915.91
ENSG00000055070	SZRD1	2480.98	1501.26	1343.36	1958.17	2027.57	966.844	1500.88	1987.85	1305.06
ENSG00000150753	CCT5	1866.64	1256.15	1038.29	1543.24	2059.61	2175.4	2300.95	1835.51	1249.58
ENSG00000096696	DSP	4585.98	382.974	4.31024	73.7968	97.7874	214.854	2235.92	70.5389	10.1482
ENSG00000111276	CDKN1B	3226.66	7184.59	3626.35	4496.97	4096.57	2376.82	3523.73	5431.49	7525.21
ENSG00000123143	PKN1	2767.99	3262.94	2578	3642.04	3162.9	1651.69	2210.25	2972.39	2465.33
ENSG00000087303	NID2	185.552	45.9569	36.8765	27.3837	30.3859	80.5703	36.7947	57.7819	26.3853
ENSG00000173757	STAT5B	4218.35	5024.62	7769.44	8537.69	6494.3	3464.52	13037.3	6161.65	8243.71
ENSG00000162736	NCSTN	1567.81	1256.15	1067.02	1330.66	1509.9	1087.7	966.93	911.002	946.487
ENSG00000120875	DUSP4	3149.52	26011.6	1349.1	5807.21	9664.93	4726.79	13391.6	355.696	1039.17
ENSG00000120686	UFM1	1742.94	1608.49	1820.84	1468.97	1841.94	3813.66	2798.11	1172.9	2049.93
ENSG00000119638	NEK9	1961.85	1179.56	3451.06	2821.45	2191.65	1208.55	915.589	2074.89	2799.54
ENSG00000141580	WDR45B	1663.02	2098.7	1045.95	1099.53	1088.37	1221.98	2052.8	954.526	1309.12
ENSG00000125503	PPP1R12C	1583.79	2114.02	1705.42	1818	1680.62	1490.55	2518.3	2898.85	2067.52
ENSG00000178952	TUFM	1322.49	2834.01	1135.99	1653.7	1872.88	2000.83	2437.86	2176.95	1743.46
ENSG00000151176	PLBD2	1197.4	903.819	450.659	627.969	516.008	187.997	1035.39	316.675	489.819
ENSG00000127947	PTPN12	2453.18	689.353	328.536	489.658	654.678	2484.25	1753.31	734.655	512.145
ENSG00000134318	ROCK2	1650.51	444.25	954.478	462.739	770.145	604.277	1057.63	904.999	841.622
ENSG00000100811	YY1	3256.54	1792.32	3435.74	3410.9	3088.31	5089.36	3834.35	5867.49	3921.26
ENSG00000088986	DYNLL1	1642.86	4013.57	339.072	1001.13	1464.05	3491.38	1555.65	636.351	781.41
ENSG00000033867	SLC4A7	1208.52	995.732	1392.69	1339.48	1768.46	1503.98	2178.59	2117.67	2555.31
ENSG00000121741	ZMYM2	2291.95	1731.04	3151.26	1391.47	2039.72	3128.81	2505.46	3011.41	2927.41
ENSG00000178982	EIF3K	987.525	3416.13	1498.05	1832.85	1918.73	2417.11	1595.01	1297.47	1896.36
ENSG00000211943	IGHV3-15	100.768	0	0.478915	11.1391	0	0	6.84552	60.0331	2.02964
ENSG00000089693	MLF2	2241.22	1868.91	906.108	1282.86	1179.53	1329.41	1660.9	1433.29	1165.69
ENSG00000108344	PSMD3	1899.3	1547.21	1228.42	1761.38	1738.63	1759.12	1839.73	1879.04	1276.64
ENSG00000144579	CTDSP1	1852.74	1715.72	1393.64	1905.26	1319.85	510.279	1250.16	1606.64	1627.77
ENSG00000147862	NFIB	636.575	199.146	1.43675	4.64131	19.889	26.8568	581.87	3.00165	4.73582
ENSG00000107816	LZTS2	2226.62	367.655	465.027	464.131	366.288	550.564	721.347	1058.83	704.284
ENSG00000241973	PI4KA	1666.49	1409.34	3214.48	3746.47	2827	1745.69	3107.87	5738.41	3064.75
ENSG00000146223	RPL7L1	2515.72	1654.45	1281.1	1709.39	1748.57	1302.55	1570.19	1995.35	1568.91
ENSG00000120451	SNX19	1988.95	934.457	2473.12	1974.41	1525.93	1141.41	941.26	1625.4	2056.7
ENSG00000132294	EFR3A	2323.22	995.732	1425.73	1444.84	1856.86	1423.41	1384.51	2288.76	1574.32
ENSG00000129009	ISLR	18.0687	137.871	0	0.464131	0.552471	40.2852	17.9695	3.00165	6.08891
ENSG00000146376	ARHGAP18	773.481	628.077	119.729	232.994	278.998	187.997	432.979	135.074	121.778
ENSG00000133835	HSD17B4	660.203	811.905	567.515	582.485	599.984	711.704	625.51	670.87	675.869
ENSG00000198618	PPIAP22	371.799	643.396	205.455	429.785	478.44	496.85	1241.61	1411.53	1088.56
ENSG00000151491	EPS8	309.948	76.5948	29.2138	31.0968	32.5958	255.139	304.626	32.2678	64.2718
ENSG00000071626	DAZAP1	2531.71	2205.93	2853.86	2754.62	2605.45	2672.25	3433.89	2420.83	2288.08
ENSG00000068650	ATP11A	1776.99	566.802	1135.99	1174.72	1001.08	577.421	1334.88	1517.34	778.027
ENSG00000100697	DICER1	2169.64	474.888	3190.05	1581.76	2136.96	1947.12	2485.78	3267.3	2594.55
ENSG00000153094	BCL2L11	929.15	2757.41	1197.29	1607.75	2115.41	5116.22	3482.66	1560.86	1091.27
ENSG00000047315	POLR2B	2206.47	1286.79	3074.64	2444.58	2875.61	2913.96	2259.88	3630.5	3288.69
ENSG00000089820	ARHGAP4	2184.93	4779.52	5526.2	5104.98	4372.26	3357.1	1938.14	4049.98	3606.66
ENSG00000138279	ANXA7	1284.27	1700.4	1467.88	2238.97	2424.8	1181.7	1257.01	1319.98	1759.69
ENSG00000113575	PPP2CA	2035.51	4350.58	1290.68	1882.98	2319.27	2994.53	2466.1	1486.57	1426.16
ENSG00000149212	SESN3	8522.18	3262.94	24527.2	8715.92	3309.3	10769.6	12979.1	18170.5	30201.7
ENSG00000198604	BAZ1A	2965.36	1777	2981.73	1274.97	1894.42	4229.94	3692.3	2537.9	2069.55
ENSG00000122515	ZMIZ2	2419.12	2359.12	3406.52	3939.08	3982.21	3585.38	3331.2	3564.47	2678.44
ENSG00000173209	AHSA2P	1847.87	1991.46	2411.82	1542.77	1208.25	2430.54	1850.86	1563.11	2397.68
ENSG00000163874	ZC3H12A	2382.99	3293.58	484.183	1094.89	1861.28	6996.19	8737.46	1026.57	1223.19
ENSG00000104415	CCN4	1275.93	45.9569	2.87349	5.56957	3.8673	0	11.9797	3.00165	1.35309
ENSG00000170323	FABP4	88.2588	658.715	0.95783	29.2403	80.1083	67.1419	18.8252	6.75372	6.08891
ENSG00000112851	ERBIN	2886.13	1930.19	4763.77	2319.26	2475.62	2833.39	2672.32	2437.34	3269.07
ENSG00000086232	EIF2AK1	1703.33	1439.98	1588.56	2198.59	2719.26	1195.13	1644.64	2115.42	1968.07
ENSG00000083168	KAT6A	2844.43	1455.3	7206.24	4150.72	3447.42	4807.36	6905.42	5189.11	5597.06
ENSG00000105971	CAV2	726.224	183.828	1.43675	25.0631	136.46	134.284	111.24	5.2529	4.73582
ENSG00000136938	ANP32B	2128.64	3492.72	2711.14	2825.63	2587.78	3370.52	1757.59	1644.91	3558.63
ENSG00000106799	TGFBR1	1878.45	1041.69	1274.39	885.098	1215.99	1181.7	792.369	1031.82	742.17
ENSG00000141543	EIF4A3	1877.06	5836.52	645.099	1050.33	1412.12	11065	2387.38	1008.56	1012.11
ENSG00000177239	MAN1B1	1565.72	1700.4	2110.58	1677.37	1246.38	832.56	1619.82	1257.69	2340.17
ENSG00000144711	IQSEC1	1547.66	1593.17	1926.68	1938.68	991.133	1839.69	725.626	2381.81	1476.22
ENSG00000117758	STX12	1246.74	857.862	992.791	690.627	728.71	913.13	915.589	1072.34	633.246
ENSG00000005007	UPF1	3454.6	2022.1	2985.08	3461.49	2814.84	2873.67	4032.87	4270.6	3749.41
ENSG00000176978	DPP7	1884.01	3508.04	2556.45	2597.74	2339.72	1973.97	2359.14	1755.22	2845.55
ENSG00000112701	SENP6	1795.75	1439.98	2424.27	1505.18	2153.53	2121.68	1601.85	1945.07	2404.44
ENSG00000105221	AKT2	2848.6	1777	3903.16	3571.95	2872.3	1396.55	3020.59	3373.86	2840.81
ENSG00000091039	OSBPL8	1736.68	1225.52	2214.03	1268.47	2443.03	4740.22	3098.46	2654.96	2476.16
ENSG00000104164	BLOC1S6	1366.97	1409.34	1534.92	1072.14	1666.25	1732.26	1896.21	1394.27	1486.37
ENSG00000136003	ISCU	1291.91	2910.6	1982.71	2295.59	2701.03	2148.54	2228.22	2318.03	2980.86
ENSG00000063245	EPN1	1462.87	811.905	1135.99	906.448	714.345	711.704	1649.77	1001.8	780.057
ENSG00000084207	GSTP1	640.05	3462.08	492.325	925.942	799.978	1477.12	347.41	710.642	790.882
ENSG00000162591	MEGF6	2225.93	796.586	3237.95	2003.65	824.287	483.422	846.278	1434.79	2738.66
ENSG00000136810	TXN	2033.43	2359.12	302.674	1208.13	2120.94	2363.4	1642.93	502.777	662.338
ENSG00000163788	SNRK	1852.04	1501.26	2015.28	1533.49	1480.62	1248.84	1216.79	1380.01	1739.4
ENSG00000174238	PITPNA	998.645	1256.15	952.083	1522.35	1429.8	980.272	1740.47	1530.84	1014.14
ENSG00000058272	PPP1R12A	2470.55	1685.09	2385.48	1730.74	2903.24	2819.96	1935.57	2385.57	3135.11
ENSG00000143543	JTB	1115.4	2573.59	1067.5	1462.48	1509.9	1718.83	1858.56	1883.54	1869.29
ENSG00000126261	UBA2	2468.47	1669.77	2258.56	2114.12	2343.03	1839.69	2004.88	2150.69	2281.31
ENSG00000171150	SOCS5	971.542	214.465	510.524	388.478	473.468	738.561	490.311	906.5	531.765
ENSG00000068912	ERLEC1	872.859	827.224	667.129	660.459	854.121	617.706	736.75	469.759	667.75
ENSG00000153310	FAM49B	1691.51	1991.46	1658.96	2062.6	2656.28	3209.38	2463.53	1626.9	1360.53
ENSG00000141027	NCOR1	2681.12	1639.13	4232.17	3488.41	3489.96	2081.4	2845.17	5524.55	3631.7
ENSG00000156639	ZFAND3	1737.38	1210.2	727.951	1049.86	938.096	1624.83	1517.99	1166.89	766.526
ENSG00000184900	SUMO3	1581.01	1976.15	811.761	1069.82	1286.71	778.846	1047.37	1351.5	1088.56
ENSG00000178252	WDR6	2975.78	1455.3	4786.28	5030.25	3016.49	3343.67	4279.31	6320.73	5450.93
ENSG00000100911	PSME2	4189.86	3814.42	1086.66	2195.8	2346.9	2067.97	1741.33	2612.94	1108.86
ENSG00000069329	VPS35	1905.56	1118.28	2233.18	1614.71	2107.13	845.988	1740.47	1419.78	2263.72
ENSG00000085719	CPNE3	1836.06	965.094	1338.57	1277.29	1418.75	966.844	1160.32	1141.38	1350.38
ENSG00000136450	SRSF1	2293.34	2451.03	2288.74	2523.94	2578.94	1436.84	1843.16	2076.39	2214.33
ENSG00000170242	USP47	1815.91	1102.97	2827.52	1505.18	2227.56	6405.34	5167.52	2188.21	2655.44
ENSG00000100266	PACSIN2	1003.51	612.758	941.547	941.258	835.337	1356.27	1578.75	1106.11	1072.32
ENSG00000117448	AKR1A1	692.171	1271.47	546.442	885.562	831.469	845.988	888.207	748.163	692.106
ENSG00000077380	DYNC1I2	1583.79	689.353	671.439	936.617	1251.9	657.991	766.699	787.184	916.719
ENSG00000085449	WDFY1	2502.52	1210.2	1258.59	1189.1	1050.8	4941.65	1126.94	1165.39	931.603
[truncated: 49,780 more rows]

## Sheet: NSClC-Tregs
ENSEMBLE_GENE_ID	GENE NAME	NSCLC-Treg1	NSCLC-Treg2	NSCLC-Treg3	NSCLC-Treg4	NSCLC-Treg5	NSCLC-Treg6	NSCLC-Treg7	NSCLC-Treg8
ENSG00000108821	COL1A1	71.9942	2.85198	52.001	168.361	82.3149	164.694	109.31	91.3423
ENSG00000168542	COL3A1	53.7619	2.28158	0	318.455	50.1682	159.85	20.657	2.85445
ENSG00000198804	MT-CO1	82290.8	70534.5	94657.9	66750.1	95885.1	67707	76430.9	75324.9
ENSG00000164692	COL1A2	38.3346	0	11.064	195.023	30.6854	123.52	1.72142	7.49292
ENSG00000211896	IGHG1	3184.11	792.849	12.7237	596.918	126.638	123.036	130.828	1699.11
ENSG00000211592	IGKC	1402.02	940.581	7.74483	548.039	228.436	100.269	98.1207	938.043
ENSG00000156508	EEF1A1	108778	116244	100989	103707	126843	62549.1	70487.7	71742.2
ENSG00000198886	MT-ND4	35937.7	35203.1	48390.8	35976.5	36360.3	24680.3	37360.8	29352.6
ENSG00000125730	C3	20.5698	15.9711	18.2557	6.41847	9.7414	109.473	31.8462	6.42251
ENSG00000198938	MT-CO3	28593.4	25278.2	32450.3	19191.7	30608	18419	19192.1	23359.7
ENSG00000113140	SPARC	72.4617	0	0.553202	33.5735	18.5087	53.7676	24.0998	0.713612
ENSG00000198727	MT-CYB	21089.6	23474	30628.6	19208.5	19802.8	14754.1	24911.5	20408.2
ENSG00000211897	IGHG3	202.425	39.3573	1.1064	6.41847	98.8752	2.42196	7.74637	195.886
ENSG00000198712	MT-CO2	25920.3	26168	31887.7	19910.6	27326.1	19234.7	25269.5	23687.6
ENSG00000019582	CD74	10813.2	11680.6	10846.6	10118.5	12221.6	14913.5	12331.4	11812.1
ENSG00000210082	MT-RNR2	35641.4	33831.8	33674	26872.7	37908.2	36750.9	26942.7	20579.8
ENSG00000115414	FN1	125.756	79.8553	179.238	571.738	116.41	159.85	857.265	60.3002
ENSG00000106366	SERPINE1	29.9197	13.6895	6.08522	129.851	79.8795	42.6266	177.306	3.92486
ENSG00000075624	ACTB	33431	49431.6	54846.1	45492.7	48313.5	30860.2	44523.6	53757.1
ENSG00000091986	CCDC80	41.1396	58.7507	52.001	18.268	54.0648	34.8763	18.9356	16.4131
ENSG00000198888	MT-ND1	21737.1	19998.1	19960.6	19433.7	15944.2	15741.8	15887.8	14133.8
ENSG00000205542	TMSB4X	34192.1	35160.3	33637.5	31844	49389.9	35551.5	29289	38511.1
ENSG00000197746	PSAP	6222.83	4673.82	4837.2	6653.98	6679.68	7140.92	6190.21	5868.39
ENSG00000198763	MT-ND2	21375.3	24649.6	21390.1	25190	17803.9	15621.7	20127.7	18627.8
ENSG00000166710	B2M	103413	112006	86548.5	84909.5	110036	87043.9	86741.3	93453.2
ENSG00000245532	NEAT1	35772.7	14917.5	20594.6	43637.2	21371.7	32467.4	28795.9	47031.3
ENSG00000198786	MT-ND5	18582.9	20963.7	24253.5	25575.1	19750.7	17625.1	25334.1	16787.4
ENSG00000087086	FTL	7391.1	5682.28	9456.44	10660.1	9377.56	9206.37	5318.32	6422.86
ENSG00000184009	ACTG1	13690.1	17644	21713.2	17236.1	22442.7	10714.8	17405.2	21985.3
ENSG00000112096	SOD2	1898.96	2112.74	2085.57	1789.27	1852.33	4207.92	2159.52	1748.71
ENSG00000137801	THBS1	189.803	63.3139	157.109	48.8791	209.927	324.543	574.953	323.266
ENSG00000124942	AHNAK	31332.5	42994.7	23115	12904.6	22934.2	20585.2	22772.6	23029.3
ENSG00000198899	MT-ATP6	14422.2	15779.4	18465.3	13511.4	14590.2	10796.6	13704.2	12789
ENSG00000211677	IGLC2	346.881	9.12632	0	42.9544	30.1984	3.39075	2.58212	103.117
ENSG00000239951	IGKV3-20	257.59	41.0684	0	18.7617	39.9398	0.484393	5.16425	245.126
ENSG00000167658	EEF2	20335.1	22313.3	19577.3	23028.5	26614.5	16065.9	16174.4	18263.5
ENSG00000142173	COL6A2	112.666	217.321	131.109	163.918	249.38	220.883	360.637	45.3143
ENSG00000134531	EMP1	323.507	485.406	344.092	16.7868	91.5692	77.9872	203.127	25.69
ENSG00000011465	DCN	11.6874	0	0	15.7993	0.97414	45.0485	3.44283	0.356806
ENSG00000163359	COL6A3	298.729	1443.67	221.834	425.1	606.889	676.697	427.772	531.998
ENSG00000142156	COL6A1	28.0497	58.1803	17.7025	54.8039	42.3751	74.1121	118.778	34.6102
ENSG00000243466	IGKV1-5	185.128	21.1046	1.65961	102.696	0.97414	0	20.657	14.9858
ENSG00000150991	UBC	19348.7	22673.8	17133.8	15777.1	21405.3	23033.8	16339.7	17720.8
ENSG00000143384	MCL1	25764.6	24274.9	18105.2	21317.7	21884.6	23934.3	19865.1	18321.6
ENSG00000164733	CTSB	3593.17	3895.8	3983.61	3053.71	4717.27	4522.77	3939.46	4258.12
ENSG00000100316	RPL3	17016.8	19325.6	18184.9	21391.8	21159.8	11494.6	13384.9	13038.4
ENSG00000182326	C1S	79.9416	37.6461	59.1926	98.252	38.9656	201.992	61.971	43.1735
ENSG00000211662	IGLV3-21	10.7524	0	0.553202	11.8495	0.48707	0	0.860708	0.713612
ENSG00000196924	FLNA	13244.6	24673	19786.9	11304.4	17974.4	16637.9	20532.2	25082.7
ENSG00000100345	MYH9	25411.6	28485	30008.5	26972.9	30965	20634.2	26154.3	32366.9
ENSG00000087245	MMP2	10.2849	0	0	10.3683	9.7414	103.66	15.4927	0
ENSG00000120129	DUSP1	2099.05	3211.89	7016.26	5561.36	1964.84	2868.09	5916.51	538.063
ENSG00000231500	RPS18	9633.67	9182.79	9954.32	8240.82	11225	6813.95	6998.42	6703.31
ENSG00000130635	COL5A1	249.642	161.992	346.858	964.252	427.161	197.148	284.894	176.262
ENSG00000175899	A2M	54.2294	2.28158	16.0429	18.7617	18.0216	43.1109	108.449	15.3427
ENSG00000137154	RPS6	13057.6	13173.3	12330.9	14194.7	15056.8	9009.22	9751.82	9904.93
ENSG00000108654	DDX5	46301.6	49567.9	43983.4	44492.4	40060.1	47399.3	36840	31059.6
ENSG00000128016	ZFP36	3630.57	4639.59	6860.26	2183.76	2047.16	2859.37	5318.32	2441.27
ENSG00000211893	IGHG2	155.676	78.7145	1.1064	35.0547	24.3535	1.45318	9.46779	89.9151
ENSG00000141753	IGFBP4	380.073	764.329	156.003	107.633	296.626	385.092	407.976	420.317
ENSG00000123384	LRP1	51.4245	18.2526	65.2779	41.9669	95.4658	193.273	205.709	40.3191
ENSG00000139329	LUM	10.2849	0	0	9.87457	2.92242	21.3133	0	1.42722
ENSG00000187498	COL4A1	60.7744	0.570395	3.31921	70.1095	11.2026	17.9225	11.1892	1.78403
ENSG00000169908	TM4SF1	226.735	0	175.918	11.8495	25.3276	8.71907	71.4388	57.0889
ENSG00000140988	RPS2	8870.25	10926.5	10188.9	10420.1	11698	7029.02	6964.85	9444.29
ENSG00000211598	IGKV4-1	35.5296	3.42237	0	93.8084	1.46121	3.39075	1.72142	254.046
ENSG00000089157	RPLP0	11071.7	12574.4	10423.4	7568.86	13175.2	7766.75	7174	8900.52
ENSG00000170345	FOS	1482.89	2680.86	8466.21	2285.96	1228.88	1661.47	5428.49	183.755
ENSG00000160789	LMNA	2818.06	5961.77	2869.46	197.985	836.787	2075.14	1243.72	842.775
ENSG00000186340	THBS2	14.9598	0	2.76601	221.19	16.0733	28.0948	6.02496	7.13612
ENSG00000105835	NAMPT	3211.69	4655.56	7827.26	2065.76	3780.15	2262.11	3482.43	3908.81
ENSG00000212907	MT-ND4L	1928.42	2619.82	3120.06	2578.25	2374.95	1564.1	4195.09	2916.53
ENSG00000070756	PABPC1	24773	16388	17911	14837.5	23460.2	11170.6	17263.2	15061.1
ENSG00000174444	RPL4	13967.8	16140.5	14765.5	16490.5	19973.3	8449.26	10309.6	11198
ENSG00000111640	GAPDH	10882.8	10515.8	17959.2	7139.32	27398.7	7219.87	9131.25	12674.5
ENSG00000101825	MXRA5	2.33748	0	0	1.48119	7.30605	0	0	0
ENSG00000124491	F13A1	0.467495	0	0	1.48119	1.46121	4.35953	1.72142	0.356806
ENSG00000134333	LDHA	5828.73	8083.64	12838.7	4053.02	13739.8	5176.22	5940.61	6865.66
ENSG00000125148	MT2A	360.439	711.853	727.461	378.69	524.575	1180.46	207.431	261.539
ENSG00000211673	IGLV3-1	142.586	1.71119	0	39.4983	0	0.484393	1.72142	0.356806
ENSG00000026025	VIM	2704.93	3201.63	3688.2	2051.44	2485.52	2418.09	2299.81	1714.1
ENSG00000163430	FSTL1	24.7772	12.5487	10.5108	102.696	21.4311	25.6728	27.5427	8.20653
ENSG00000182718	ANXA2	1864.84	2762.42	3591.39	861.556	1920.03	2394.35	2810.21	2302.47
ENSG00000130066	SAT1	5555.71	5373.12	4473.19	5897.59	4237.02	7333.22	5025.67	3593.75
ENSG00000167978	SRRM2	37862.9	32720.1	29645.6	36348.3	29951.4	31787.8	29703.9	30942.6
ENSG00000198840	MT-ND3	3919.48	5352.59	7073.8	5214.76	5009.52	2923.31	4997.27	4526.8
ENSG00000077942	FBLN1	6.07744	5.70395	0	5.92474	6.81898	1.45318	1.72142	1.78403
ENSG00000137818	RPLP1	11210.1	15202.7	10440.6	9536.37	13377.9	9053.3	8361.78	8552.28
ENSG00000133112	TPT1	11499.9	12134.6	11611.2	9230.75	12717.4	7100.23	8031.27	6682.62
ENSG00000142871	CCN1	41.1396	0	43.1498	11.8495	17.0475	29.548	84.3494	30.3285
ENSG00000135486	HNRNPA1	19896.6	25252	18706	15753.9	17443	16992.5	14604.5	13629.6
ENSG00000166598	HSP90B1	5348.14	8622.66	7470.44	4391.72	6266.16	4904.48	4949.93	5173.68
ENSG00000204262	COL5A2	15.4273	15.9711	6.08522	72.0844	15.5862	84.2843	68.8567	9.27695
ENSG00000148303	RPL7A	8420.52	8871.35	8037.47	10168.8	10410.6	5772.02	6026.68	6343.65
ENSG00000102265	TIMP1	370.724	690.748	366.22	366.84	485.122	724.167	240.998	301.144
ENSG00000142534	RPS11	11801.4	10592.2	10856	12740.2	13239.5	7440.27	8234.39	8626.85
ENSG00000187514	PTMA	16525	16611.6	16967.8	13590.9	17443.4	14967.2	13608.7	13017
ENSG00000251562	MALAT1	18954.1	17487.7	16573.9	18522.2	15878.5	18993	20944.5	13991.4
ENSG00000251562	MALAT1	18954.1	17487.7	16573.9	18522.2	15878.5	18993	20944.5	13991.4
ENSG00000110321	EIF4G2	18213.6	23332	16599.9	14245.6	14987.6	17262.8	14395.3	13987.1
ENSG00000159403	C1R	86.9541	61.6027	55.8734	125.407	68.1898	94.4566	98.9814	52.0937
ENSG00000115380	EFEMP1	3.73996	0	9.95764	4.44356	1.94828	0	12.0499	2.85445
ENSG00000211679	IGLC3	234.683	18.823	0	43.9418	7.30605	46.5017	1.72142	64.2251
ENSG00000167526	RPL13	8783.3	9656.79	9955.98	11403.7	11285.9	6781.98	6803.04	7553.58
ENSG00000134871	COL4A2	48.6195	1.14079	2.76601	93.8084	18.0216	15.5006	22.3784	2.85445
ENSG00000204287	HLA-DRA	799.884	1001.04	644.481	353.51	1222.06	776.966	984.65	1023.32
ENSG00000118515	SGK1	598.394	1112.27	709.758	39.0046	301.009	507.159	607.66	294.365
ENSG00000147604	RPL7	9155.42	10264.8	8724	11083.7	11900.6	5675.63	6688.56	7020.15
ENSG00000152583	SPARCL1	18.6998	10.8375	1.65961	4.93729	14.6121	3.39075	4.30354	2.85445
ENSG00000211892	IGHG4	146.326	0	0	43.4481	0	0.968785	0.860708	0
ENSG00000182492	BGN	10.7524	0	1.1064	23.699	8.28019	12.5942	0	0
ENSG00000125740	FOSB	3326.23	6056.46	11108.9	3335.14	1681.85	3962.82	5610.1	165.201
ENSG00000122566	HNRNPA2B1	22846.9	24830.4	22598.9	21790.7	18719.6	20322.7	21305.1	20633.7
ENSG00000211966	IGHV5-51	53.2944	6.27435	0	31.5986	41.401	0.484393	0	23.5492
ENSG00000149273	RPS3	11890.7	11519.7	11918.2	14355.7	13477.7	8873.1	8790.41	8726.4
ENSG00000167460	TPM4	3336.04	4565.44	6033.78	4054.5	4561.9	3569.01	4782.09	4712.69
ENSG00000178209	PLEC	12674.7	13484.1	11378.8	9955.05	7784.36	14643.2	18328.8	14784.3
ENSG00000067082	KLF6	26486.4	32908.4	26277.1	14848.9	14719.3	26993.3	19449.4	11122
ENSG00000142541	RPL13A	13512.5	12999.9	11636.6	14913.6	16278.4	9784.73	8984.93	9274.45
ENSG00000067225	PKM	9560.74	17851.1	24615.3	8824.91	25574.1	9832.69	10290.6	12729.4
ENSG00000135821	GLUL	334.259	734.669	318.091	215.266	591.303	800.701	318.462	309.351
ENSG00000122862	SRGN	9010.5	9368.17	7926.28	7606.38	11495.8	7909.65	8294.64	11026
ENSG00000000971	CFH	3.27247	0	7.19163	2.46864	5.84484	8.71907	1.72142	5.35209
ENSG00000100979	PLTP	22.9073	14.8303	23.7877	27.6488	18.0216	47.9549	25.8212	14.629
ENSG00000074800	ENO1	13410.6	17856.2	37466.7	9040.67	42195.9	8649.8	11863.1	13069.1
ENSG00000161016	RPL8	7667.39	8338.61	10708.3	9635.61	10950.8	5739.57	6719.55	7456.89
ENSG00000059804	SLC2A3	4667	4820.41	5826.88	4188.3	10175.9	4074.23	4102.14	2914.03
ENSG00000147065	MSN	11843.5	16365.2	14552	12361	15036.8	12775.9	14295.5	16347.4
ENSG00000142798	HSPG2	15.4273	6.27435	11.064	30.6112	14.6121	16.9537	13.7713	7.13612
ENSG00000167996	FTH1	1625.01	966.249	1213.17	1108.91	2688.63	1850.38	1668.05	1980.99
ENSG00000177954	RPS27	11222.7	11126.7	9724.74	13971.5	12751.5	8450.71	7850.52	7137.19
ENSG00000198034	RPS4X	9691.64	10652.7	9753.51	10508.5	12184.5	6316.48	11545.5	11680
ENSG00000131016	AKAP12	9.3499	0	12.1704	9.87457	12.6638	5.32832	37.8712	4.28167
ENSG00000138326	RPS24	4838.57	6206.47	4915.2	6263.44	5761.55	4439.94	4147.75	4091.85
ENSG00000211949	IGHV3-23	134.639	1.71119	0	33.5735	11.6897	0	4.30354	238.346
ENSG00000142192	APP	431.03	659.947	311.453	277.476	541.135	422.875	465.643	276.525
ENSG00000034510	TMSB10	6524.83	9866.69	8966.3	6080.76	9424.81	7928.05	7658.58	7440.83
ENSG00000096384	HSP90AB1	9210.59	19087.1	16754.8	7710.07	8089.75	10481.8	8443.55	7014.8
ENSG00000100201	DDX17	31664.4	22503.2	27486.4	40109	30092.2	35865.9	28256.2	30348.1
ENSG00000112936	C7	0	0	0	0	1.46121	0	0	0
ENSG00000122406	RPL5	8461.66	8963.19	8194.03	10250.8	10541.2	4922.88	6525.89	6453.19
ENSG00000150093	ITGB1	3817.56	4346.98	4650.22	3413.64	5001.24	4729.13	5674.65	4894.66
ENSG00000185650	ZFP36L1	7114.34	5559.64	6863.58	10202.4	5038.25	4290.27	5369.1	6374.34
ENSG00000196126	HLA-DRB1	315.559	480.273	546.564	196.998	327.311	557.536	1075.89	480.261
ENSG00000135046	ANXA1	776.042	1129.95	772.823	155.031	746.679	1363.57	559.46	356.806
ENSG00000038427	VCAN	13.5574	0	14.9365	20.2429	37.5044	182.132	39.5926	6.0657
ENSG00000177575	CD163	8.88241	0	32.0857	21.7241	11.2026	234.93	42.1747	4.28167
ENSG00000204628	RACK1	10510.2	11443.8	9895.13	11202.7	11961.5	8228.86	7695.59	8043.83
ENSG00000118523	CCN2	29.9197	0	0	13.3307	20.4569	82.8311	0	0.713612
ENSG00000084234	APLP2	5736.16	3340.8	3392.79	3930.08	4929.15	4311.58	4609.95	5782.04
ENSG00000106624	AEBP1	24.3097	58.7507	33.1921	26.1676	27.763	27.126	35.289	23.906
ENSG00000166441	RPL27A	7085.35	7423.69	6042.63	8255.14	8056.14	5658.68	5503.37	5108.75
ENSG00000197956	S100A6	1796.58	2096.77	2668.65	1659.92	2217.63	2443.76	2408.26	2311.75
ENSG00000136156	ITM2B	5084.48	5103.32	4077.65	6953.18	6067.92	6036.02	4942.19	4633.12
ENSG00000104419	NDRG1	3394.48	3827.35	6301.53	3162.33	5237.47	2919.43	4329.36	3580.9
ENSG00000100234	TIMP3	37.8671	0	0	6.9122	9.7414	37.7826	33.5676	0
ENSG00000211895	IGHA1	228.605	19.9638	15.4897	181.692	110.078	98.3317	48.1997	249.407
ENSG00000108298	RPL19	9275.57	9161.12	8409.23	10073.5	10098.4	6663.79	6885.67	6321.89
ENSG00000134107	BHLHE40	4211.66	7424.83	3558.75	1452.55	5040.2	4253.94	3071.01	4829.01
ENSG00000127022	CANX	5027.44	7223.48	5992.84	4701.78	5908.65	4984.4	4859.56	5374.57
ENSG00000211459	MT-RNR1	7515.92	7265.12	6875.2	4076.72	6453.19	6687.04	3979.05	2323.52
ENSG00000035862	TIMP2	218.788	120.353	107.874	98.7457	244.996	198.117	216.038	170.553
ENSG00000122026	RPL21	7946.01	8328.91	7891.98	8797.26	8961.12	5141.83	6175.58	5526.57
ENSG00000157227	MMP14	98.6415	12.5487	106.768	78.9966	86.6985	1170.78	272.844	119.173
ENSG00000152518	ZFP36L2	3434.69	3903.78	4071.57	4641.54	4916.49	3774.87	4106.44	4515.73
ENSG00000080824	HSP90AA1	11725.7	17382.8	17222.3	9339.37	10259.2	10791.3	9327.49	9114.96
ENSG00000115677	HDLBP	3104.63	3406.4	2924.23	2807.34	3359.81	3567.07	3589.15	3973.03
ENSG00000147403	RPL10	8168.54	8365.41	9250.65	9648.94	10526.1	6173.58	6084.35	5687.49
ENSG00000169045	HNRNPH1	32241.7	35565.3	29399.9	25164.4	17888.6	26411	27344.7	21857.9
ENSG00000122786	CALD1	79.4742	0.570395	5.53202	33.5735	5.35777	11.141	15.4927	4.28167
ENSG00000110799	VWF	6.54493	0	0	15.7993	2.92242	1.93757	0.860708	3.92486
ENSG00000116016	EPAS1	1208.47	942.293	627.331	747.999	1377.92	942.144	1114.62	1174.96
ENSG00000163682	RPL9	8579.47	7816.12	8506.04	9010.55	7562.74	5326.38	7657.72	4937.84
ENSG00000092820	EZR	10945.9	8639.77	9470.27	8956.24	9565.57	8522.4	8218.9	8887.68
ENSG00000112306	RPS12	6305.11	7514.38	6392.25	7209.43	7715.19	5674.18	4803.61	4160.71
ENSG00000137076	TLN1	7833.35	10447.4	10246.4	9786.69	9349.31	8737.47	9843.92	10621
ENSG00000075426	FOSL2	2174.32	2437.87	7196.61	3312.43	5601.79	2154.09	5437.95	5965.44
ENSG00000177606	JUN	3213.56	5172.34	12153.9	5730.21	4226.79	4147.85	9067.56	5693.91
ENSG00000164924	YWHAZ	16107.5	20045.4	19805.2	12826.1	16169.3	12563.7	15102.8	13702.8
ENSG00000133110	POSTN	1.40249	6.27435	0	0	3.40949	5.81271	0	0
ENSG00000044574	HSPA5	4305.16	8687.12	6876.86	4090.54	3894.61	5511.9	3844.78	3658.69
ENSG00000134954	ETS1	31166.5	35287.5	30149	26888	36592.6	25432.1	33451.4	36547.6
ENSG00000149131	SERPING1	34.5946	1.71119	60.8522	33.0798	16.0733	90.097	24.0998	8.20653
ENSG00000142676	RPL11	7840.36	8585.59	7612.62	9510.69	9064.38	6727.25	5864	5412.03
ENSG00000157514	TSC22D3	11052	9121.76	6853.62	4713.13	5795.16	7372.94	8047.62	4763.36
ENSG00000087460	GNAS	8921.21	9543.28	8684.72	8532.12	9300.12	8170.25	7811.79	8442.03
ENSG00000173812	EIF1	13032.4	15156	16210.5	13320.8	11938.6	13346.5	11921.7	6512.78
ENSG00000174748	RPL15	7353.23	8400.21	8111.05	8605.69	9727.28	5834.51	6175.58	6035.73
ENSG00000166147	FBN1	12.6224	32.5125	5.53202	23.699	20.4569	28.0948	27.5427	23.5492
ENSG00000109971	HSPA8	12099.2	23073.6	23061.9	7965.32	11160.7	11913.6	12410.6	6861.73
ENSG00000211938	IGHV3-7	5.14245	0.570395	0	0	19.9699	67.815	0.860708	39.6054
ENSG00000100644	HIF1A	3906.39	5981.16	3591.39	2952.5	4096.26	6878.86	4368.95	4460.79
ENSG00000197694	SPTAN1	10400.4	10418.8	8409.23	11460.4	11272.3	11480.6	10869.9	12441.1
ENSG00000118785	SPP1	13.5574	0	31.5325	12.3432	174.858	6.7815	47.3389	4.28167
ENSG00000090104	RGS1	20520.7	27154.8	23039.2	11704.3	18459.5	14307	23796.9	11824.2
ENSG00000132475	H3F3B	10253.6	11953.2	9605.8	8607.17	8867.6	10624.7	8651.84	9316.2
ENSG00000140575	IQGAP1	11256.3	11519.1	10655.2	8288.22	9506.15	7263.47	10198.5	11205.8
ENSG00000231389	HLA-DPA1	1266.91	1497.29	1608.16	919.323	2226.4	1834.88	1901.3	1656.65
ENSG00000143947	RPS27A	6968.95	7567.43	6937.71	6919.11	8349.36	4431.71	5147.03	4841.86
ENSG00000125691	RPL23	5143.85	5563.06	5086.69	6952.69	7110.74	3787.47	4066.85	3997.3
ENSG00000162511	LAPTM5	13380.6	9857	10255.8	15579.6	17195	11979.5	11394.1	12625.9
ENSG00000118181	RPS25	5873.14	5670.3	5126.52	5931.16	7263.19	4784.35	4270.83	4152.51
ENSG00000154734	ADAMTS1	7.47992	0	1.1064	8.88712	7.79312	0.968785	0	0
ENSG00000113657	DPYSL3	9.3499	2.28158	2.21281	9.87457	3.89656	7.75028	15.4927	1.78403
ENSG00000185215	TNFAIP2	97.7065	56.4691	79.1079	101.214	90.5951	691.713	125.663	94.1967
ENSG00000187955	COL14A1	3.73996	0	0.553202	2.46864	0.48707	0	0.860708	0.356806
ENSG00000115594	IL1R1	8117.12	6495.09	10642	4460.84	4423.08	2591.02	6307.27	6131.35
ENSG00000008988	RPS20	6004.51	6339.37	5639.34	6471.3	7596.83	5183	4726.15	4597.8
ENSG00000197958	RPL12	5932.04	5953.78	4941.2	4944.2	6562.3	4584.78	4141.73	4655.25
ENSG00000169504	CLIC4	336.596	169.407	148.811	613.705	356.535	364.263	385.597	225.144
ENSG00000137573	SULF1	4.20746	0	0.553202	4.44356	11.2026	27.6104	0	0.713612
ENSG00000280411	IGHV1-69D	109.861	6.84474	0	10.862	15.0992	0	0	13.5586
ENSG00000135404	CD63	637.663	789.997	1177.77	815.146	904.976	1009.96	824.558	862.4
ENSG00000109046	WSB1	7656.63	4466.19	4231.44	7113.64	6737.15	5351.57	6806.48	6487.09
ENSG00000170421	KRT8	301.534	1.14079	107.321	1.48119	87.1856	1.45318	253.909	19.9811
ENSG00000171223	JUNB	2382.82	3930.02	4895.29	3138.14	2862.51	2934.45	3482.43	2896.19
ENSG00000124212	PTGIS	2.80497	8.55593	9.95764	12.8369	0.48707	73.6277	64.5531	21.7652
ENSG00000139644	TMBIM6	9899.67	10915.1	10743.2	9317.15	10153.5	9850.12	9534.06	9622.34
ENSG00000010327	STAB1	10.7524	5.13356	13.8301	65.6659	8.28019	13.0786	69.7174	9.27695
ENSG00000089009	RPL6	8119.45	8105.88	7875.94	9713.12	9996.63	5271.65	6210.01	6467.46
ENSG00000168906	MAT2A	2744.66	2943.24	2122.64	2059.84	1607.82	2271.8	2290.34	2314.96
ENSG00000196531	NACA	6345.78	6398.12	5894.37	5736.63	7249.55	4723.31	4762.3	4674.51
ENSG00000158859	ADAMTS4	57.9694	26.2382	29.3197	27.1551	21.9182	33.9075	29.2641	14.2722
ENSG00000185624	P4HB	1989.19	2365.43	2400.9	2124.02	2697.88	2166.69	2177.59	2360.63
ENSG00000125810	CD93	36.4646	6.27435	39.8306	27.1551	17.0475	68.2994	51.6425	78.1405
ENSG00000103196	CRISPLD2	4.20746	19.3934	2.21281	16.7868	4.8707	2.42196	5.16425	4.63848
ENSG00000158710	TAGLN2	5561.32	6837.33	6029.35	3504.49	6545.25	4707.81	3806.05	3820.68
ENSG00000009307	CSDE1	10668.2	12714.7	9140.56	10214.8	10335.1	8950.12	8636.35	7961.41
ENSG00000168028	RPSA	9370.94	12953.7	10623.7	8579.52	10160.3	5693.55	6756.56	6743.27
ENSG00000144713	RPL32	6696.87	7775.63	6605.79	7082.54	7199.38	5160.24	4894.85	4328.77
ENSG00000177469	CAVIN1	17.7648	3.99277	22.6813	23.699	45.2975	31.9699	62.8317	26.7604
ENSG00000143878	RHOB	287.509	168.267	265.537	358.447	204.082	389.452	605.078	568.035
ENSG00000142089	IFITM3	34.1271	199.638	47.5754	169.349	127.125	229.118	49.0604	223.717
ENSG00000112715	VEGFA	71.5267	10.8375	316.985	222.178	817.304	211.195	205.709	166.985
ENSG00000145592	RPL37	4944.69	5640.64	4586.6	5426.08	6377.7	3399.95	3840.48	3976.24
ENSG00000149925	ALDOA	5195.74	5674.86	7950.07	5570.74	8932.87	5492.04	4844.07	5869.1
ENSG00000129538	RNASE1	2.33748	0	34.2985	11.8495	37.5044	56.1895	92.0958	9.27695
ENSG00000152952	PLOD2	13.0899	0	18.2557	65.6659	9.25433	8.71907	73.1602	15.3427
ENSG00000138821	SLC39A8	498.817	799.124	799.93	231.065	872.83	982.833	697.174	663.659
ENSG00000107562	CXCL12	1.86998	2.85198	1.1064	0	0	0	0	2.49764
ENSG00000071082	RPL31	4640.82	5008.07	4588.26	5359.42	6075.23	3835.91	3877.49	3793.2
ENSG00000108107	RPL28	6724.92	8488.05	6622.38	8448.19	7570.53	8807.71	5993.11	5156.2
ENSG00000184557	SOCS3	1230.45	2634.65	3318.66	2929.79	3037.86	2441.34	4728.73	4720.54
ENSG00000124145	SDC4	721.812	853.311	1283.98	1016.59	938.097	654.899	1064.7	1056.15
ENSG00000142937	RPS8	5132.63	5898.46	5065.67	6251.59	5986.58	4022.88	3804.33	3316.87
ENSG00000164587	RPS14	6547.27	7376.35	6308.16	7364.95	7667.95	5258.08	4796.73	4816.17
ENSG00000197756	RPL37A	4082.63	4354.4	3939.35	4180.89	4787.9	3469.7	3077.89	3181.28
ENSG00000177600	RPLP2	5646.4	5851.68	5674.2	5511.49	6041.13	4235.05	4634.05	3875.27
ENSG00000211663	IGLV3-19	142.586	0	0	160.956	9.25433	2.90636	0.860708	67.7931
ENSG00000116285	ERRFI1	169.701	28.5198	127.79	113.064	90.108	41.1734	296.084	110.967
ENSG00000261371	PECAM1	57.9694	22.2454	29.8729	57.2725	156.837	130.302	170.42	101.333
ENSG00000214548	MEG3	5.60994	0.570395	0	1.97491	0.97414	0.968785	0.860708	3.21125
ENSG00000085063	CD59	1636.23	1162.47	1088.7	1320.72	1355.03	1732.67	1712.81	1419.73
ENSG00000197747	S100A10	926.108	877.838	1475.39	695.17	1702.31	869.485	1130.11	1261.31
ENSG00000173372	C1QA	19.1673	0	63.0651	23.2052	26.7889	78.956	31.8462	4.99528
ENSG00000115524	SF3B1	23146.6	21774.3	18959.9	22007.5	20315.7	18031.5	18637.8	18084.7
ENSG00000179218	CALR	4682.9	7627.32	7070.48	4796.08	5143.95	5358.84	4454.16	5789.89
ENSG00000165119	HNRNPK	11867.4	14796	12468.6	11832.7	11819.2	11838.1	10778.6	10919.7
ENSG00000105193	RPS16	8652.87	9535.29	8347.27	7228.68	8170.6	5688.71	8462.48	5866.96
ENSG00000149257	SERPINH1	194.478	148.303	220.728	256.245	276.169	218.945	247.884	298.29
ENSG00000153187	HNRNPU	11352.6	12884.7	11107.7	10550	9933.8	10892.1	9757.85	9643.03
ENSG00000163453	IGFBP7	12.1549	1.14079	0	10.862	3.89656	10.1722	0.860708	1.42722
ENSG00000100097	LGALS1	360.439	551.572	1224.24	237.977	649.752	377.826	622.292	289.013
ENSG00000215301	DDX3X	16870.5	20687.1	14225	10657.1	12941	15472.5	17372.5	15895.3
ENSG00000181163	NPM1	7890.85	9883.24	7243.63	6456.49	9040.51	5919.28	5340.69	6037.51
ENSG00000111799	COL12A1	12.1549	0	0.553202	30.1174	6.81898	14.0474	1.72142	0.713612
ENSG00000188846	RPL14	6228.44	6865.85	5690.79	6755.2	7165.29	4817.77	5090.23	4982.08
ENSG00000204592	HLA-E	11244.7	12546.4	8992.3	10612.2	10566.5	13185.7	10299.2	9679.43
ENSG00000173369	C1QB	27.5822	3.42237	53.6606	17.7742	18.9957	47.9549	35.289	2.49764
ENSG00000170525	PFKFB3	6738.01	4560.31	8175.78	2371.38	11101.8	7481.93	7440.82	10852.6
ENSG00000026508	CD44	10929.6	11372.5	10629.2	8579.52	8484.76	7829.72	9994.54	7368.4
ENSG00000170889	RPS9	4084.97	6385.57	5706.83	4556.13	6636.82	5459.59	3534.07	4697.35
ENSG00000115053	NCL	9437.79	12998.2	9504.57	7724.38	8982.55	9702.39	7114.61	7403.36
ENSG00000198695	MT-ND6	5050.82	7070.05	8098.88	9430.22	6314.86	6203.62	5891.55	4267.04
ENSG00000164111	ANXA5	1684.38	2343.18	2119.87	1432.31	1886.42	2457.32	2573.52	2385.6
ENSG00000067560	RHOA	7161.09	8186.88	7420.1	6062.99	7496.5	6250.6	7058.67	7317.02
ENSG00000196262	PPIA	5067.18	6801.39	5778.75	4491.45	5262.79	4518.41	4581.55	4515.38
ENSG00000013588	GPRC5A	78.0717	19.3934	143.833	24.6864	52.1165	7.75028	199.684	84.9198
ENSG00000145425	RPS3A	4077.96	4284.24	3359.6	5102.69	4977.86	2520.78	3158.8	2984.32
ENSG00000171863	RPS7	5296.72	5350.31	5091.67	5341.16	6192.61	4151.73	4275.14	4147.15
ENSG00000265972	TXNIP	11246.5	8601.56	7194.95	9104.36	8403.42	5279.88	4041.89	4101.48
ENSG00000105372	RPS19	7113.87	6954.26	6162.12	6977.37	8830.58	5516.26	4659.01	5117.67
ENSG00000135862	LAMC1	44.412	0	26.5537	33.0798	66.7286	54.7364	57.6674	18.9107
ENSG00000163513	TGFBR2	1127.13	1386.06	1304.45	1327.14	1435.88	1508.4	1657.72	1446.13
ENSG00000260032	NORAD	10355.9	9053.88	7742.62	10299.7	10602.5	9877.25	9673.5	9357.23
ENSG00000127603	MACF1	6888.54	9073.85	8145.35	6307.38	8950.89	7293.5	9150.19	9382.57
ENSG00000091136	LAMB1	63.1118	13.6895	54.767	50.8541	35.0691	47.4705	64.5531	26.7604
ENSG00000131469	RPL27	4511.33	5523.14	4393.53	5502.11	5225.78	2931.54	3794.86	3830.67
ENSG00000125844	RRBP1	963.04	1495.58	1087.04	473.486	996.546	850.109	997.561	1338.02
ENSG00000138119	MYOF	243.565	605.76	328.049	49.8666	150.992	128.364	685.984	794.25
ENSG00000100219	XBP1	605.406	858.445	784.441	494.716	681.898	589.021	555.157	556.617
ENSG00000173706	HEG1	1046.72	1021.01	1716.03	1654.98	1392.53	763.887	1078.47	976.578
ENSG00000116251	RPL22	3986.33	4556.32	4079.87	4920.01	5074.3	2869.06	3157.94	3242.65
ENSG00000101439	CST3	16.8298	3.99277	21.5749	14.8119	20.944	67.3306	35.289	9.99056
ENSG00000134352	IL6ST	4561.82	6173.39	3420.45	2543.2	3570.22	4374.55	3725.14	3233.37
ENSG00000115306	SPTBN1	2447.8	2168.07	3782.8	1829.26	3075.85	1455.12	3262.94	3120.98
ENSG00000132386	SERPINF1	107.991	86.1297	138.301	135.775	97.414	110.442	96.3993	94.1967
ENSG00000224373	IGHV4-59	80.4091	9.12632	1.1064	2.46864	29.7113	0	0.860708	10.7042
ENSG00000241351	IGKV3-11	14.0249	0	0	65.6659	33.6078	3.87514	29.2641	154.14
ENSG00000211666	IGLV2-14	122.016	0	0	2.96237	13.1509	0.484393	2.58212	27.8309
ENSG00000168610	STAT3	8236.33	9248.39	9484.65	5781.56	8545.65	5550.66	7658.58	8881.97
ENSG00000162244	RPL29	4566.02	4746.83	4548.43	5203.9	5571.11	3189.73	3766.46	3900.96
ENSG00000142949	PTPRF	85.0841	3.99277	54.767	2.96237	56.0131	13.0786	109.31	46.028
ENSG00000101096	NFATC2	2952.7	3385.87	2565.2	2118.59	2513.77	2555.66	2861.85	2917.96
ENSG00000123358	NR4A1	134.171	286.909	676.013	380.665	398.91	387.514	540.525	664.729
ENSG00000102144	PGK1	5991.42	7175.57	13343.2	3899.96	11295.2	4642.9	5427.63	6448.2
ENSG00000130522	JUND	2706.33	3182.23	4295.06	2768.83	2837.18	3853.83	3694.16	2235.39
ENSG00000178878	APOLD1	150.066	70.1586	121.151	152.562	553.312	95.9097	202.266	238.346
ENSG00000075223	SEMA3C	9.8174	0	18.8089	2.96237	7.30605	41.6578	39.5926	8.92015
ENSG00000198755	RPL10A	4855.87	6026.22	4679.54	5907.46	4432.83	3863.03	2991.82	3892.75
ENSG00000211941	IGHV3-11	0.93499	0	0	27.1551	0.48707	0.484393	0	152.713
ENSG00000051108	HERPUD1	2977.94	2436.73	1922.38	2390.63	2369.11	2863.25	1606.94	2277.13
ENSG00000170776	AKAP13	12747.2	11630.9	8757.74	8648.64	8230.02	8598.94	8596.75	8648.26
ENSG00000062716	VMP1	2682.02	2025.47	2756.05	2660.21	1942.44	1719.59	2898	3274.05
ENSG00000159189	C1QC	28.5172	0	41.4902	29.13	19.4828	107.051	57.6674	3.92486
ENSG00000147162	OGT	14896.7	13617	18486.9	29196.1	15286.2	13259.3	21645.1	18754.4
ENSG00000120738	EGR1	146.326	90.6928	503.967	801.815	257.66	320.668	290.059	277.595
ENSG00000167004	PDIA3	2595.06	4511.83	3663.86	3122.34	3032.01	3305.5	2479.7	2499.42
ENSG00000120708	TGFBI	88.8241	41.6388	164.854	145.65	101.311	262.056	833.165	137.013
ENSG00000092199	HNRNPC	9054.44	12566.4	10166.8	8417.58	9558.27	9096.89	7979.63	8218.67
ENSG00000182871	COL18A1	678.803	277.212	219.621	298.706	625.398	912.596	676.517	439.585
ENSG00000168385	SEPTIN2	5263.99	7152.75	5179.08	5429.04	5706.03	5093.39	5509.39	5634.32
ENSG00000149591	TAGLN	885.436	213.328	345.751	513.972	594.713	418.515	442.404	625.837
ENSG00000168036	CTNNB1	4837.17	4694.35	5734.49	5070.59	4112.82	4044.68	4620.28	6209.14
ENSG00000086062	B4GALT1	1437.55	1693.5	1571.09	1454.03	1984.32	1502.59	1986.51	1650.94
ENSG00000183255	PTTG1IP	1899.43	1651.86	1889.74	1837.16	1595.64	1764.16	1756.71	1533.55
ENSG00000114353	GNAI2	6239.66	6814.51	6500.13	6295.04	7348.43	6420.14	6142.01	6645.51
ENSG00000170144	HNRNPA3	9534.09	12062.7	9847.55	9005.12	8311.85	7882.52	8721.56	8457.01
ENSG00000112769	LAMA4	21.0373	2.28158	0.553202	22.7115	2.92242	12.5942	8.60708	0
ENSG00000161638	ITGA5	644.208	564.121	674.353	465.092	471.971	838.968	850.38	511.303
ENSG00000136235	GPNMB	71.0592	3.42237	80.2143	74.0593	75.0088	202.961	78.3244	38.8918
ENSG00000196735	HLA-DQA1	585.304	9.12632	876.826	10.862	5.35777	12.5942	1228.23	692.917
ENSG00000105640	RPL18A	4324.8	4769.64	4588.26	4305.81	4798.13	3096.72	3784.53	3763.23
ENSG00000141367	CLTC	3190.65	3391.57	3425.43	3057.17	3367.6	2546.45	3268.97	3690.09
ENSG00000211651	IGLV1-44	2.80497	0	1.65961	0.987457	8.76726	1.45318	0.860708	59.5866
ENSG00000134294	SLC38A2	7946.01	7935.34	5779.86	2266.71	4262.84	3169.38	4040.16	3025
ENSG00000137575	SDCBP	1314.6	1440.82	994.658	994.863	1497.74	1337.41	1445.13	1425.8
ENSG00000102854	MSLN	0.467495	0	14.9365	0	0	0	18.0749	0
ENSG00000161011	SQSTM1	3281.82	2549.67	2458.43	2982.12	2655.51	4170.14	2488.31	2500.5
ENSG00000196576	PLXNB2	516.115	861.867	785.547	1366.64	980.472	597.256	543.968	720.034
ENSG00000166741	NNMT	1.86998	0	0	14.3181	0	21.3133	8.60708	0
ENSG00000211653	IGLV1-40	182.323	0.570395	0	0	27.763	1.93757	39.5926	140.582
ENSG00000124762	CDKN1A	717.605	720.979	1396.28	278.957	519.217	894.673	899.44	706.832
ENSG00000211899	IGHM	309.014	598.915	140.513	426.088	118.358	264.963	149.763	279.379
ENSG00000174437	ATP2A2	3664.23	5822.02	4407.36	3344.02	3218.56	3660.07	3903.31	4047.25
ENSG00000065978	YBX1	3448.71	5158.08	4433.92	3522.26	4093.82	3656.68	3456.6	3719.7
ENSG00000071967	CYBRD1	57.9694	41.0684	21.5749	14.8119	42.3751	27.126	75.7423	53.5209
ENSG00000211611	IGKV6-21	0.93499	0	0	0	0	2.42196	0	0
ENSG00000133048	CHI3L1	13.5574	0	2.76601	6.9122	1.94828	8.71907	14.632	3.92486
ENSG00000157557	ETS2	134.639	151.155	201.919	117.507	135.406	399.14	214.316	276.525
ENSG00000110700	RPS13	4337.42	4470.19	4030.63	4300.38	4684.15	2839.51	3231.1	2837.32
ENSG00000187109	NAP1L1	8377.98	8178.9	7784.11	6886.03	10070.7	5681.44	6150.62	5661.44
ENSG00000090339	ICAM1	261.797	1097.44	580.862	394.489	407.678	393.327	401.951	347.529
ENSG00000140391	TSPAN3	1712.9	1348.98	1286.2	553.47	749.601	635.523	633.481	636.185
ENSG00000119681	LTBP2	49.5545	39.9277	33.1921	35.0547	35.5561	30.0323	30.1248	22.8356
ENSG00000182578	CSF1R	54.2294	25.0974	43.703	49.3729	40.4268	85.2531	88.6529	31.0421
ENSG00000089280	FUS	9306.89	10777.6	8296.93	9603.52	5423.04	9364.76	7439.96	6143.84
ENSG00000140937	CDH11	3.73996	0	0	18.268	6.81898	8.23468	0	7.84973
ENSG00000197102	DYNC1H1	5984.4	5857.39	5367.17	5629	5777.63	5897.48	6105.86	7559.65
ENSG00000100600	LGMN	3384.2	1368.38	461.924	631.973	2603.39	3292.42	2031.27	1578.51
ENSG00000063177	RPL18	4931.61	5729.62	4977.71	5305.61	5728.43	3863.03	3950.65	4017.99
ENSG00000233927	RPS28	2875.56	3201.06	2700.18	3377.6	3338.87	2497.53	2523.6	2260.01
ENSG00000138061	CYP1B1	92.564	106.093	19.3621	11.8495	13.1509	216.039	89.5136	43.5303
ENSG00000152795	HNRNPDL	9178.33	9600.32	7056.09	7091.42	7385.45	7533.76	7107.73	6472.81
ENSG00000105974	CAV1	23.8422	30.8013	25.4473	21.2303	39.4527	21.7977	28.4034	16.0563
ENSG00000188157	AGRN	818.116	1330.16	696.482	256.245	629.295	1403.29	433.797	847.057
ENSG00000118849	RARRES1	18.6998	10.2671	5.53202	4.93729	3.89656	6.2971	6.88567	3.92486
ENSG00000143549	TPM3	7750.6	11255.6	9416.61	7235.1	8712.71	8072.4	8139.72	8567.62
ENSG00000163399	ATP1A1	2481.93	3341.37	2934.74	2665.15	2840.59	2741.66	2942.76	2459.82
ENSG00000172270	BSG	2613.3	2453.84	2317.92	2282.01	2690.58	2270.83	2521.87	2789.15
ENSG00000162909	CAPN2	6558.02	7417.99	5669.22	5024.18	4639.83	7133.65	5516.28	5766.7
ENSG00000206503	HLA-A	13051.5	9433.19	10489.8	2402.48	9323.98	11260.2	13626.7	9184.18
ENSG00000108679	LGALS3BP	1164.53	2843.42	606.31	652.709	821.2	2793.98	733.323	797.104
ENSG00000138071	ACTR2	10040.9	12686.7	12021.1	9760.03	11016.6	7756.58	10498.9	10510.8
ENSG00000128595	CALU	655.428	831.636	896.188	729.731	718.429	685.416	823.698	685.067
ENSG00000171345	KRT19	127.626	0	229.026	8.88712	0.48707	5.81271	268.541	62.7978
ENSG00000078369	GNB1	5799.28	6985.06	5934.75	5258.7	5925.21	5714.86	5820.11	5845.55
ENSG00000211660	IGLV2-23	28.9847	7.41514	0	2.96237	0	3.39075	0.860708	1.78403
ENSG00000163638	ADAMTS9	6.54493	2.28158	0	1.48119	2.43535	1.93757	1.72142	0.356806
ENSG00000131459	GFPT2	6.54493	13.6895	0	12.3432	5.84484	40.689	2.58212	4.28167
ENSG00000114391	RPL24	4240.65	4443.38	4391.87	4753.13	4898.95	3433.38	3294.79	3165.94
ENSG00000100906	NFKBIA	7584.64	13590.8	8096.67	2505.67	6795.12	7841.83	3923.97	3333.64
ENSG00000111669	TPI1	4637.08	4069.77	8700.21	2609.36	12689.2	3365.08	3328.36	4466.14
ENSG00000100650	SRSF5	13032.4	12555.5	11226.7	12901.1	11233.8	16413.6	11681.5	9843.56
ENSG00000170458	CD14	18.2323	9.12632	23.7877	18.268	29.7113	299.355	63.6924	23.5492
ENSG00000124831	LRRFIP1	3404.3	4651.57	3888.46	2609.36	3882.44	2845.81	4060.82	3428.9
ENSG00000044115	CTNNA1	1795.65	2111.03	2332.85	2162.53	1731.05	1543.76	2148.33	2790.22
ENSG00000089597	GANAB	5141.04	5077.66	5109.93	5362.88	5902.32	5415.99	4739.92	5371
ENSG00000154553	PDLIM3	3.27247	0	0	8.88712	0	1.45318	1.72142	0.713612
ENSG00000073921	PICALM	4078.43	5198.58	8409.78	3391.92	4022.71	2831.76	5016.21	4230.29
ENSG00000110955	ATP5F1B	4714.22	6159.13	4823.92	3914.77	4729.94	4375.03	4192.51	4959.24
ENSG00000211959	IGHV4-39	7.01243	0	0	9.87457	0	1.93757	0	75.9996
ENSG00000170027	YWHAG	1263.64	1559.46	1777.99	1404.16	1579.57	1349.03	2059.67	2295.33
ENSG00000128272	ATF4	5834.34	5067.39	4680.64	3184.55	4641.78	5656.25	3879.21	3437.82
ENSG00000063046	EIF4B	7975.47	7153.32	6777.28	10987.4	11000.5	4861.85	5792.57	5832.71
ENSG00000147872	PLIN2	1188.37	864.149	983.04	792.928	1735.92	1095.21	788.409	937.329
ENSG00000109472	CPE	11.2199	61.0323	35.9581	55.7913	57.9614	0.968785	27.5427	67.0795
ENSG00000113083	LOX	25.7122	8.55593	21.0217	9.87457	11.6897	12.1098	40.4533	13.9154
ENSG00000107581	EIF3A	7395.77	10130.2	8707.96	6070.89	7205.23	6347.97	6898.58	6717.58
ENSG00000182899	RPL35A	3645.06	4011.02	3583.09	3940.45	4304.24	2759.59	2754.27	2696.74
ENSG00000159140	SON	12855.6	15434.9	11515.5	13180.6	10469.6	12823.3	12448.4	11850.6
ENSG00000152661	GJA1	4.20746	0	2.76601	21.7241	43.8363	20.3445	23.2391	0
ENSG00000136167	LCP1	12071.2	14934.7	16443.9	13778.5	17337.8	10436.2	12372.7	11897.7
ENSG00000173821	AC124319.1	62836.9	79575.2	48536.9	31250.6	39860.8	65185.7	53757.2	83503.3
ENSG00000130255	RPL36	2135.05	2471.52	2141.45	2616.27	2646.25	2002.96	2004.59	1749.42
ENSG00000131051	RBM39	9679.02	11255.6	8740.04	9524.03	8631.37	9315.84	7781.66	7713.79
ENSG00000213741	RPS29	3995.21	4582.55	4417.32	5101.2	5505.84	4220.03	3255.2	3031.07
ENSG00000101160	CTSZ	700.308	940.011	1233.64	1235.31	1125.13	1239.08	1266.96	1003.69
ENSG00000198918	RPL39	3645.53	3627.71	3580.88	3205.29	4364.64	2698.55	2588.15	2803.42
ENSG00000116560	SFPQ	14303	18080.4	11830.2	9593.64	7562.74	11969.3	10564.3	9379.71
ENSG00000145423	SFRP2	10.7524	0	0	0.493729	0	4.35953	0	0
ENSG00000113721	PDGFRB	14.9598	0	0	71.0969	3.89656	23.7352	0	1.07042
ENSG00000211945	IGHV1-18	43.477	9.12632	0.553202	37.5234	0	0	1.72142	144.15
ENSG00000147526	TACC1	4120.97	4753.1	5086.14	4040.18	3766.03	3273.53	4897.43	4547.85
ENSG00000011028	AC080038.1	49.087	88.9816	68.5971	31.5986	103.259	86.7063	203.988	120.957
ENSG00000028137	TNFRSF1B	16352.5	17620.6	29717.5	16749.3	18234	12229.9	27839.6	21555
ENSG00000067167	TRAM1	4285.53	4788.47	5102.18	3391.42	4918.43	3617.44	4752.83	3738.97
ENSG00000156482	RPL30	2964.85	3451.46	2700.73	3591.88	3503.5	2909.75	2426.34	2084.1
ENSG00000120594	PLXDC2	9.3499	1.14079	5.53202	1.97491	3.89656	48.4393	18.0749	5.35209
ENSG00000131446	MGAT1	2568.42	2452.7	3200.27	3704.45	4308.14	2879.71	2706.93	3290.11
ENSG00000068697	LAPTM4A	1584.81	1165.89	1279.56	1322.7	1635.58	1340.31	1355.62	1425.08
ENSG00000058262	SEC61A1	2553.93	3043.63	2691.88	2880.91	2649.66	3128.21	2582.12	2640.72
ENSG00000106483	SFRP4	0.93499	0	0	0	0.97414	0	0	0
ENSG00000240382	IGKV1-17	0	1.71119	0	25.1802	0	0	0	18.9107
ENSG00000030582	GRN	510.037	462.02	487.371	417.201	672.157	995.427	557.739	572.317
ENSG00000244437	IGKV3-15	137.444	0	0.553202	3.94983	8.28019	0	0.860708	29.2581
ENSG00000111897	SERINC1	5249.5	4978.98	4551.75	4227.3	4694.38	4231.17	4533.35	4052.96
ENSG00000109475	RPL34	3962.02	4404.59	4375.28	4320.62	5145.9	3227.51	3126.09	2980.04
ENSG00000118503	TNFAIP3	20072.4	18164.2	17335.1	13090.7	14736.3	14673.7	9497.91	9975.93
ENSG00000091490	SEL1L3	2831.62	2590.73	2237.7	4002.66	2825.01	2541.12	2828.29	2977.9
ENSG00000170348	TMED10	2265.95	2690.55	2254.3	2553.07	2707.62	1809.69	2206	2269.29
ENSG00000114867	EIF4G1	3949.87	6473.41	4949.5	4267.79	4087.01	4517.45	4443.84	5071.64
ENSG00000179820	MYADM	1776.48	2134.42	1036.15	351.535	694.075	1473.04	905.465	298.29
ENSG00000145741	BTF3	4162.58	4698.34	3897.86	3964.15	5060.66	3255.12	3306.84	3469.58
ENSG00000152291	TGOLN2	9583.18	7779.62	8492.21	9770.4	8471.61	9041.67	9145.02	8709.99
ENSG00000107372	ZFAND5	5838.55	6228.14	4379.7	3749.38	5075.76	5619.92	4086.64	3637.99
ENSG00000121966	CXCR4	11235.3	10321.3	6872.43	1625.35	6497.03	5473.64	7114.61	3883.47
ENSG00000211648	IGLV1-47	18.6998	11.4079	0	0.493729	0.48707	0	0	43.8871
ENSG00000156976	EIF4A2	12130.1	13237.7	11651	10258.7	10592.3	12681.4	9215.6	6959.85
ENSG00000135047	CTSL	531.542	394.143	932.699	81.4652	268.863	2421.48	1655.14	648.316
ENSG00000125868	DSTN	515.647	521.341	392.22	300.187	519.217	443.219	427.772	412.111
ENSG00000162692	VCAM1	13.5574	10.2671	3.87242	8.39339	7.79312	5.81271	1.72142	16.4131
ENSG00000169604	ANTXR1	23.8422	3.99277	0	14.8119	6.33191	3.87514	3.44283	0
ENSG00000110651	CD81	1232.78	1368.38	1065.47	983.014	1280.51	1517.6	1236.84	1175.68
ENSG00000072110	ACTN1	224.865	235.573	423.2	182.68	307.828	265.932	379.572	184.469
ENSG00000143761	ARF1	4340.69	4693.78	3912.8	3595.33	3919.94	4353.72	3877.49	4226.01
ENSG00000162434	JAK1	13505.9	11652	11488.4	13743.4	13194.7	11612.3	13032	13336
ENSG00000102024	PLS3	32.7247	2.28158	64.7247	19.7491	117.871	30.0323	209.152	40.3191
ENSG00000172037	LAMB2	26.1797	0.570395	8.85124	17.2805	6.81898	25.6728	24.9605	3.21125
ENSG00000148175	STOM	790.067	1135.66	536.053	827.983	1061.33	1428.96	607.66	744.297
ENSG00000132465	JCHAIN	72.4617	42.2092	1.65961	2.46864	11.6897	6.7815	7.74637	79.2109
ENSG00000221983	UBA52	4479.54	4811.85	4331.02	4519.1	5386.02	3137.9	3649.4	4049.75
ENSG00000081237	PTPRC	35013	30245.8	27513.5	28295.6	37600.8	25483.9	29584.3	28028.2
ENSG00000092841	MYL6	2530.55	3043.63	3208.57	2723.9	2877.12	2808.02	2602.78	2951.5
ENSG00000185896	LAMP1	2849.85	3074.43	2659.8	3204.79	2912.19	3516.21	2679.38	2902.26
ENSG00000128510	CPA4	1.86998	0	0	0	1.46121	0	1.72142	0
ENSG00000115310	RTN4	1419.31	1603.38	1496.41	1158.29	1525.99	1654.2	1660.31	1475.75
ENSG00000109332	UBE2D3	6606.64	8677.42	7387.46	5632.46	6326.55	6593.07	6381.29	5804.16
ENSG00000133800	LYVE1	0	0	0.553202	0	0	0	0	0
ENSG00000108691	CCL2	34.5946	0	22.6813	19.7491	2.43535	116.254	36.1497	27.474
ENSG00000130203	APOE	146.793	18.2526	100.683	40.9795	115.436	224.274	185.052	13.5586
ENSG00000228253	MT-ATP8	375.866	659.377	657.757	531.746	499.734	324.543	828.001	712.184
ENSG00000131236	CAP1	5269.6	7167.01	6910.05	5975.1	6648.99	5473.15	6322.76	7353.77
ENSG00000240583	AQP1	7.94742	0	7.74483	12.8369	4.8707	7.26589	23.2391	6.42251
ENSG00000270550	IGHV3-30	37.8671	1.14079	1.1064	0	3.40949	0	0	38.8918
ENSG00000123342	MMP19	21.5048	7.98553	27.1069	2.96237	13.1509	88.6439	40.4533	13.2018
ENSG00000185787	MORF4L1	4320.59	4966.43	3922.76	3813.56	4228.26	4011.26	4178.74	4098.27
ENSG00000117523	PRRC2C	11119.4	13388.9	10948.4	8992.77	9360.51	9585.16	9747.52	9585.23
ENSG00000102802	MEDAG	25.2447	3.42237	1.65961	13.8244	3.40949	9.20346	2.58212	2.49764
ENSG00000163466	ARPC2	6388.79	7466.47	7079.88	6721.13	6451.73	5092.9	6181.61	6185.23
ENSG00000133872	SARAF	11442.9	8326.06	7152.35	6846.04	10862.6	11064.5	8904.03	8386.72
ENSG00000243290	IGKV1-12	1.40249	329.688	0	0	0	0	0	3.21125
ENSG00000188042	ARL4C	5543.09	5430.16	7303.93	3400.31	4557.52	3428.05	5142.73	4258.83
ENSG00000257017	HP	0.93499	0	0.553202	0	0.97414	0	0	0.356806
ENSG00000135048	CEMIP2	3519.77	3067.01	2684.14	2675.02	2222.01	2424.39	3379.14	3245.51
ENSG00000071127	WDR1	6363.54	6981.64	7408.48	6403.66	7270.98	5931.87	7286.76	7653.13
ENSG00000196562	SULF2	93.499	90.6928	114.513	43.4481	64.7803	108.02	92.0958	59.5866
ENSG00000115461	IGFBP5	23.3748	0	0	396.958	5.84484	0.968785	2.58212	3.56806
ENSG00000058668	ATP2B4	11534	11997.7	11197.4	8870.82	11960.5	11426.8	11158.2	12163.2
ENSG00000116741	RGS2	892.448	514.496	462.477	265.626	933.714	406.89	701.477	748.935
ENSG00000211973	IGHV1-69	37.8671	3.99277	1.65961	0	0	0	0	17.4835
ENSG00000171988	JMJD1C	3254.7	3874.12	2438.52	1793.72	2306.76	2330.41	2548.56	2687.46
ENSG00000077549	CAPZB	3291.63	4002.46	3649.47	3440.79	4411.88	3078.8	3462.63	4130.03
ENSG00000178726	THBD	19.1673	0	30.4261	14.3181	26.3018	17.4381	51.6425	28.1877
ENSG00000145685	LHFPL2	81.8116	45.6316	66.9375	75.5405	69.651	232.508	123.081	62.441
ENSG00000096060	FKBP5	2549.72	4888.86	1441.09	1357.75	2514.26	2465.56	1982.21	3015.37
ENSG00000079308	TNS1	30.8547	39.9277	55.8734	78.5029	34.0949	85.7375	37.8712	16.4131
ENSG00000161203	AP2M1	3124.27	3223.3	3302.62	3267.5	3703.19	3028.91	3079.61	3866.35
ENSG00000087074	PPP1R15A	8558.43	9093.24	8987.32	3862.44	3368.58	8767.51	4667.62	1656.29
ENSG00000060237	WNK1	9376.55	8173.76	9627.93	7464.19	10091.6	6585.32	8397.07	8886.61
ENSG00000119138	KLF9	971.455	921.188	1283.98	727.756	921.05	955.222	1067.28	687.922
ENSG00000163520	FBLN2	13.5574	0	6.08522	1.48119	1.46121	5.32832	0.860708	0
ENSG00000060138	YBX3	143.521	211.617	86.8527	95.7834	148.069	285.792	155.788	22.122
ENSG00000106682	EIF4H	4629.6	5118.73	4255.23	3944.89	4835.15	4117.34	4062.54	4628.49
ENSG00000145623	OSMR	44.8795	37.0757	70.8099	32.0924	62.8321	35.8451	103.285	63.5114
ENSG00000100292	HMOX1	108.926	58.7507	386.135	212.797	281.527	220.399	160.952	259.398
ENSG00000234745	HLA-B	10410.6	31715.1	15774	7073.65	15438.2	8151.36	15885.2	8638.98
ENSG00000116679	IVNS1ABP	8184.9	5300.11	6533.32	2547.64	3998.85	4438.01	7697.31	3216.25
ENSG00000163131	CTSS	2683.42	2306.68	2471.71	2240.54	2752.92	3185.85	2246.45	1842.55
ENSG00000138080	EMILIN1	19.6348	11.4079	11.064	40.4857	21.9182	75.5653	10.3285	22.8356
ENSG00000130402	ACTN4	4989.57	5616.68	6705.92	4933.34	6046	4298.5	6576.67	7280.27
ENSG00000151726	ACSL1	1265.04	1022.15	1063.25	971.658	854.321	1075.84	1192.94	1173.89
ENSG00000168209	DDIT4	517.049	629.716	1238.07	375.234	1049.15	370.56	730.741	2078.39
ENSG00000047849	MAP4	4280.85	4580.84	4110.29	2706.62	3479.14	3926.49	3905.89	4069.01
ENSG00000115268	RPS15	3300.05	3035.64	3184.23	3775.54	3726.57	3560.77	2786.97	2517.98
ENSG00000198467	TPM2	276.29	301.739	119.492	391.527	448.105	159.85	363.219	208.375
ENSG00000087116	ADAMTS2	1.86998	0	1.1064	9.87457	0.97414	2.90636	0	0.713612
ENSG00000041982	TNC	27.1147	4.56316	67.4907	93.8084	36.0432	24.2196	332.233	98.8352
ENSG00000070831	CDC42	5618.82	7656.41	6280.5	4917.04	5854.1	4772.24	5547.26	5481.96
ENSG00000189403	HMGB1	6040.97	6003.98	4328.25	5646.77	5507.3	5417.45	4945.63	6122.43
ENSG00000118680	MYL12B	2914.36	3790.85	3360.15	2822.65	3479.14	2830.31	2897.14	3141.32
ENSG00000165280	VCP	4849.79	6056.46	7463.25	4768.93	5482.95	5191.72	5353.6	5864.1
ENSG00000205403	CFI	0.93499	0	1.1064	1.48119	1.46121	1.45318	3.44283	0
ENSG00000082641	NFE2L1	1661.01	1834.39	1885.31	1695.46	2238.57	2374.01	1724	1851.11
ENSG00000211947	IGHV3-21	21.9723	29.0901	0	59.2474	23.8664	0	0.860708	78.8541
ENSG00000172757	CFL1	3668.43	6147.15	5254.87	4537.37	4293.52	3838.81	3942.9	4240.99
ENSG00000182944	EWSR1	8322.35	10498.7	8338.97	7391.61	5410.86	7434.94	7507.1	6983.05
ENSG00000090863	GLG1	6163.92	4665.83	4746.47	4818.3	5858.48	5279.4	5393.2	5619.34
ENSG00000102804	TSC22D1	679.738	713.564	283.793	348.079	715.993	669.915	322.766	251.905
ENSG00000135677	GNS	1050.46	1025.57	1143.47	1540.43	1379.87	1477.88	1390.9	1189.23
ENSG00000138674	SEC31A	1756.85	2262.19	1879.78	1821.36	1886.42	1672.61	1837.61	1641.31
ENSG00000118816	CCNI	5434.63	6726.1	5593.43	5252.29	6342.14	4588.17	5038.59	4235.64
ENSG00000099622	CIRBP	7562.67	6152.85	4527.96	10429	6283.21	8277.79	5650.55	7009.45
ENSG00000075785	RAB7A	2138.79	2476.66	2458.98	2537.27	2407.59	2531.92	2267.11	2621.81
ENSG00000113369	ARRDC3	1835.85	1679.24	1248.58	3685.68	1496.28	2210.28	1390.04	1572.09
ENSG00000004399	PLXND1	1450.64	577.81	394.986	444.356	1496.28	1738	1243.72	1209.21
ENSG00000072778	ACADVL	5408.45	5810.61	5511.55	5059.73	6533.07	6181.82	5105.72	6571.29
ENSG00000168461	RAB31	47.217	0	28.2133	52.3352	52.1165	123.036	71.4388	49.2392
ENSG00000104408	EIF3E	4099.46	3752.06	3386.7	3622.98	5372.87	2561.47	2902.31	2727.42
ENSG00000083845	RPS5	2848.45	3748.07	3307.6	2918.43	3560.97	1727.34	2453.02	2451.26
ENSG00000104635	SLC39A14	209.905	548.72	394.433	280.932	326.337	380.733	315.88	331.116
ENSG00000119335	SET	5160.21	6302.3	5127.08	4775.84	5239.9	4531.01	4498.92	4722.33
ENSG00000159388	BTG2	4890.93	4785.61	6340.8	3686.18	3030.06	2810.45	2899.73	2722.07
ENSG00000169714	CNBP	5377.13	5458.68	4598.22	5231.55	5317.83	4906.9	4393.05	4372.3
ENSG00000186081	KRT5	499.752	1.71119	0	5.43102	51.6294	0.484393	43.0354	13.9154
ENSG00000116754	SRSF11	13757	11939.5	8870.04	9922.46	9474	9693.67	10140.9	9348.67
ENSG00000143933	CALM2	2751.21	2787.52	2383.75	2302.26	2344.76	2073.69	2349.73	2341.36
ENSG00000083857	FAT1	36.9321	0	14.3833	17.7742	20.4569	6.2971	34.4283	11.061
ENSG00000183283	DAZAP2	9215.26	8776.1	7033.97	7957.92	7522.31	7707.17	6858.98	6207.35
ENSG00000248527	MTATP6P1	1359.94	2154.95	2220.55	1677.2	1764.66	1402.32	1438.24	1463.26
ENSG00000120885	CLU	52.3594	62.1731	29.8729	60.7286	90.5951	93.4878	53.3639	87.4174
ENSG00000150687	PRSS23	11.2199	98.6783	45.3626	8.88712	13.638	37.2982	31.8462	27.1172
ENSG00000151914	DST	39.7371	23.3862	54.767	27.6488	68.1898	18.4069	222.923	43.1735
ENSG00000101335	MYL9	22.9073	0	4.42562	3.4561	1.94828	8.23468	10.3285	3.21125
ENSG00000164949	GEM	169.233	81.5665	120.045	33.5735	128.587	81.8624	132.549	119.173
ENSG00000114942	EEF1B2	2349.16	2667.17	2294.13	2327.44	2421.23	1404.25	1635.35	1549.25
ENSG00000118705	RPN2	2272.03	2805.77	2261.49	2394.58	2334.53	2435.53	2198.25	2124.42
ENSG00000091527	CDV3	7876.36	8858.24	8096.11	6482.16	6889.61	7903.84	6857.26	6890.99
ENSG00000071054	MAP4K4	3022.82	3719.55	3211.34	1972.45	2442.17	2464.59	2828.29	2314.96
ENSG00000075415	SLC25A3	5297.19	5654.9	4358.13	3485.23	4056.32	3788.92	3553	3939.14
ENSG00000128591	FLNC	5.14245	8.55593	1.65961	1.97491	5.35777	5.81271	26.682	0.713612
ENSG00000152601	MBNL1	15644.3	17778.1	14717.9	12229.7	14363.2	11548.9	11338.1	10094.4
ENSG00000204291	COL15A1	24.7772	17.6822	14.9365	43.9418	6.81898	22.2821	7.74637	6.77931
ENSG00000164938	TP53INP1	6482.29	5863.66	2156.38	6261.47	4874.6	8401.31	3970.45	4120.04
ENSG00000075420	FNDC3B	469.365	711.283	523.329	955.365	453.462	419	800.459	372.148
ENSG00000266412	NCOA4	2543.17	2956.36	2834.61	2427.17	2954.08	2597.31	2329.94	3100.64
ENSG00000138760	SCARB2	708.255	536.742	481.286	403.376	415.958	1008.99	552.575	444.223
ENSG00000137491	SLCO2B1	16.8298	0	26.0005	23.2052	9.7414	84.7687	61.971	7.84973
ENSG00000077147	TM9SF3	2956.44	3183.95	3270.53	2981.63	3124.07	2888.43	3484.15	2828.76
ENSG00000133816	MICAL2	3323.89	3478.27	2842.91	3313.41	4633.5	2591.02	3612.39	4372.3
ENSG00000127481	UBR4	7265.34	6805.95	5679.73	5494.71	6004.6	7792.91	7081.05	8127.68
ENSG00000090382	LYZ	75.2667	20.5342	70.8099	90.8461	108.13	934.393	506.096	59.2298
ENSG00000179344	HLA-DQB1	760.614	1.14079	970.317	1.97491	1.46121	4.35953	1120.64	915.564
ENSG00000085733	CTTN	242.63	272.078	102.342	38.5108	65.2674	165.662	259.073	200.882
ENSG00000117868	ESYT2	4606.23	2827.45	2704.05	2016.88	3101.66	2478.15	2655.28	3150.24
ENSG00000166913	YWHAB	10520.5	8472.65	9060.9	9011.04	10830	10761.8	10108.2	9076.78
ENSG00000135535	CD164	6936.22	8869.07	6033.78	5609.25	6099.09	9327.95	5802.89	5834.13
ENSG00000179094	AC129492.1	2333.27	2545.1	2466.18	677.396	1262	2090.15	1126.67	751.79
ENSG00000163660	CCNL1	13651.8	18384.4	12266.2	8116.41	8982.55	14607.8	9894.7	7537.88
ENSG00000133657	ATP13A3	8328.42	6371.31	7413.46	11471.8	5902.8	6482.63	7541.52	7780.15
ENSG00000129657	SEC14L1	2902.68	3377.31	5649.3	2780.68	4840.02	2706.79	3458.33	3676.17
ENSG00000160710	ADAR	19523.5	25073.4	13354.9	11253.6	12776.8	24464.7	14165.5	14886.3
ENSG00000196498	NCOR2	2179.46	2491.49	2721.2	2340.77	2115.35	1788.86	2632.05	2501.92
ENSG00000072274	TFRC	9212.46	16667.5	8913.19	5711.45	12529.4	12520.1	11904.5	11079.5
ENSG00000107957	SH3PXD2A	1663.35	1329.02	1696.67	1049.67	2706.65	1561.68	2432.36	2285.7
ENSG00000159840	ZYX	1644.18	1744.27	1879.23	2159.08	2522.05	1777.72	1634.48	1909.62
ENSG00000178695	KCTD12	40.2046	13.1191	99.5764	29.13	56.0131	93.0034	86.0708	24.9764
ENSG00000171992	SYNPO	23.8422	0	4.97882	38.5108	8.28019	21.7977	10.3285	18.9107
ENSG00000147140	NONO	6229.37	7541.76	5864.5	5503.59	6075.23	5615.56	5209.87	5714.96
ENSG00000168615	ADAM9	136.976	133.472	112.853	81.4652	172.423	149.677	125.663	115.248
ENSG00000084070	SMAP2	9837.5	11836.8	6629.58	5664.55	9257.74	6721.92	7226.51	9434.66
ENSG00000111057	KRT18	54.6969	1.71119	42.5966	8.88712	39.4527	21.7977	142.878	18.1971
ENSG00000184347	SLIT3	0	3.42237	0	2.46864	0	0	0.860708	0.356806
ENSG00000198561	CTNND1	453.003	330.829	272.729	228.103	218.207	198.117	336.537	236.562
ENSG00000136942	RPL35	2509.51	2940.39	2767.12	2799.44	2812.83	2156.52	2199.11	2095.88
ENSG00000119655	NPC2	303.404	177.963	265.537	460.649	263.992	532.832	348.587	195.173
ENSG00000146278	PNRC1	5059.23	4672.11	4152.89	3851.58	4084.57	4855.55	2978.05	1746.56
ENSG00000011304	PTBP1	4358.46	6171.67	4508.04	3891.57	4066.55	4418.15	4945.63	5332.82
ENSG00000221869	CEBPD	13.0899	3.99277	13.2769	17.2805	10.7155	21.3133	14.632	16.7699
ENSG00000152818	UTRN	2915.3	3206.76	1782.42	2649.84	2621.41	3481.33	2094.1	1983.84
ENSG00000069275	NUCKS1	3334.17	3214.18	2601.16	3057.17	3423.13	2426.32	3274.13	3073.17
ENSG00000185201	IFITM2	499.285	811.672	475.201	844.276	1355.52	864.641	542.246	946.249
ENSG00000072364	AFF4	3296.77	3667.64	2656.48	2358.05	2757.79	2670.94	2984.94	2597.55
ENSG00000150938	CRIM1	205.698	151.155	104.002	223.165	124.69	99.7849	205.709	143.079
ENSG00000129351	ILF3	9323.72	10657.8	8835.75	8003.34	6508.72	7858.3	8771.48	8090.22
ENSG00000160255	ITGB2	3869.92	5235.66	5510.45	4797.07	6614.41	3374.28	5226.22	5117.31
ENSG00000165732	DDX21	2084.09	4716.03	3160.44	1630.79	1591.75	2084.34	2078.61	1650.94
ENSG00000165124	SVEP1	0.93499	0	0	0	3.40949	0	0	1.07042
ENSG00000166033	HTRA1	18.2323	24.527	13.2769	28.1425	28.7371	51.83	38.7319	14.2722
ENSG00000132510	KDM6B	2365.06	3292.32	2889.38	2329.91	2112.42	2564.37	2462.49	2347.43
ENSG00000198668	CALM1	7101.25	8130.41	8284.76	6124.21	6555.48	5561.31	6628.31	6153.83
ENSG00000165168	CYBB	73.3967	4.56316	67.4907	18.268	49.1941	349.247	189.356	54.5913
ENSG00000117519	CNN3	115.939	1.71119	17.1493	17.7742	6.33191	9.68785	29.2641	7.49292
ENSG00000138448	ITGAV	708.255	650.25	700.907	565.813	566.463	699.463	892.554	612.992
ENSG00000211659	IGLV3-25	0.467495	0	0	2.46864	12.6638	1.93757	0	127.38
ENSG00000108946	PRKAR1A	5664.64	5406.2	5407	5477.43	7943.63	4383.75	5759	6840.32
ENSG00000123349	PFDN5	3070.04	2934.68	2557.45	2997.92	2876.64	2732.94	2232.68	2070.9
ENSG00000102317	RBM3	2974.67	4795.88	3018.82	2046.01	1789.01	2252.91	2520.15	2067.69
ENSG00000166340	TPP1	7770.23	4978.98	5774.32	8904.4	6755.66	6681.23	6958.83	7191.42
ENSG00000184007	PTP4A2	5161.15	6286.89	5041.88	4988.63	6287.59	5437.31	4877.63	4601.37
ENSG00000013441	CLK1	9542.04	8836.56	8428.59	5530.25	5750.35	9360.4	6871.89	5236.13
ENSG00000162734	PEA15	894.318	1149.92	1189.94	1257.53	1280.99	1389.72	842.633	810.663
ENSG00000160691	SHC1	1218.76	1127.67	1023.98	927.716	927.869	1080.68	978.625	875.245
ENSG00000211962	IGHV1-46	2.80497	0	0	0	0	0	0	0
ENSG00000086758	HUWE1	8423.33	11946.4	12737.5	7200.54	8751.19	8488.01	10709.8	10646.7
ENSG00000186480	INSIG1	1078.04	1052.38	900.613	604.818	1011.16	788.107	716.97	1057.57
ENSG00000067182	TNFRSF1A	294.054	239.566	397.752	667.027	346.794	400.593	375.269	320.768
ENSG00000134250	NOTCH2	2502.5	3680.76	2355.54	1717.19	2406.61	3267.71	3594.32	2912.25
ENSG00000282651	IGHV5-10-1	0	0	0	25.6739	0	0	21.5177	0
ENSG00000172809	RPL38	2188.81	2448.14	2173.53	2561.46	2561.01	1790.32	1700.76	1529.63
ENSG00000133639	BTG1	9538.77	6566.39	9408.31	7365.44	8100.95	7613.2	7085.35	6328.31
ENSG00000035403	VCL	194.01	224.736	229.579	118.495	189.957	210.711	252.187	183.755
ENSG00000112081	SRSF3	5990.48	7763.65	6921.11	4948.64	5411.84	6861.42	5116.05	5471.26
ENSG00000149115	TNKS1BP1	413.733	406.692	550.989	434.481	452.488	423.844	415.722	390.346
ENSG00000074695	LMAN1	2729.24	3780.58	3780.58	1853.46	3042.73	2127.94	3213.02	2642.86
ENSG00000128567	PODXL	35.0621	29.6605	42.5966	16.7868	23.3794	28.5792	30.1248	30.6853
ENSG00000180879	SSR4	1107.03	1206.96	1021.76	956.846	1085.68	1023.52	929.565	1191.73
ENSG00000100380	ST13	2186.47	2721.35	2847.88	2274.61	2821.11	2209.31	2157.8	2027.37
ENSG00000115091	ACTR3	5578.62	8894.17	8784.3	5255.25	6472.68	5450.39	6698.89	6763.61
ENSG00000130985	UBA1	4479.07	5083.36	5232.74	4581.31	4679.77	4881.71	5494.76	6062.13
ENSG00000120063	GNA13	3875.53	4313.9	3854.16	3222.07	3595.06	3269.65	3974.75	3170.22
ENSG00000152234	ATP5F1A	4545.92	5099.9	4581.62	4635.62	5397.22	3955.07	4064.26	4891.45
ENSG00000146674	IGFBP3	45.347	86.1297	207.451	149.106	70.6252	18.8913	157.51	16.4131
ENSG00000118985	ELL2	389.891	718.698	533.287	256.245	562.566	371.529	544.828	377.857
ENSG00000229117	RPL41	2677.81	2823.46	2514.3	3259.1	2944.34	2589.56	2265.38	1877.51
ENSG00000115457	IGFBP2	5.14245	0	9.40444	2.96237	19.4828	0.484393	3.44283	2.49764
ENSG00000111348	ARHGDIB	8576.66	7278.24	9773.42	10993.4	11519.7	6567.88	8173.28	9512.44
ENSG00000122218	COPA	3022.36	3558.12	3023.8	2696.25	3259.96	2556.14	2955.67	3397.15
ENSG00000110422	HIPK3	2929.32	3138.31	2860.06	2435.56	2793.35	2134.72	3107.16	2573.28
ENSG00000107438	PDLIM1	27.5822	4.56316	8.85124	12.8369	26.7889	4.35953	31.8462	12.4882
ENSG00000182670	TTC3	4756.29	3442.33	4032.29	4204.59	4170.78	3153.4	3627.02	3342.56
ENSG00000050405	LIMA1	1643.71	1612.51	2000.38	1263.45	2245.88	1426.05	1730.88	1897.49
ENSG00000130702	LAMA5	63.1118	19.3934	23.2345	30.6112	48.2199	38.267	46.4782	42.4599
ENSG00000105373	NOP53	4727.31	5233.37	4481.49	4941.73	6197.48	3730.79	4644.38	4234.93
ENSG00000175215	CTDSP2	3920.41	3681.9	2800.31	4302.35	3951.6	4507.27	3770.76	3910.95
ENSG00000159176	CSRP1	879.358	886.964	949.295	1052.14	923.972	1118.46	970.879	915.207
ENSG00000120889	TNFRSF10B	1096.74	816.235	699.801	1223.95	965.373	1023.52	907.186	761.78
ENSG00000171603	CLSTN1	3685.26	3493.67	3573.69	4788.18	3658.38	3863.52	3880.07	3803.91
ENSG00000173575	CHD2	8685.12	9651.08	6948.77	6299.98	5773.24	6834.3	6409.69	4867.9
ENSG00000110077	MS4A6A	5.60994	0	7.74483	8.39339	6.81898	4.84393	29.2641	10.3474
ENSG00000170275	CRTAP	1855.96	1218.36	1218.7	1576.97	2152.85	1327.72	1340.12	1473.61
ENSG00000163110	PDLIM5	366.984	434.641	414.348	346.598	354.587	348.763	456.175	330.759
ENSG00000134308	YWHAQ	2229.48	2820.6	1881.99	1838.15	2447.53	2238.86	2380.72	2830.54
ENSG00000184640	SEPTIN9	11416.7	8376.82	9280.52	11853.9	14524.4	8911.37	8785.25	10932.5
ENSG00000144381	HSPD1	2130.84	3287.19	3583.64	1838.65	2282.41	2314.91	2257.64	2144.76
ENSG00000169715	MT1E	37.8671	67.3066	150.471	83.4401	64.2933	93.4878	31.8462	30.6853
ENSG00000104852	SNRNP70	7847.84	8241.64	8247.14	13201.3	7530.59	12156.8	8607.94	8856.63
ENSG00000142864	SERBP1	4032.14	6261.23	4752.01	4086.1	4473.74	4123.63	4324.2	4102.55
ENSG00000179010	MRFAP1	3042.46	2915.29	2254.3	2403.47	2798.22	2404.04	2469.37	3022.5
ENSG00000099860	GADD45B	614.288	1044.39	734.099	433.987	517.269	669.915	408.836	521.293
ENSG00000168056	LTBP3	3475.36	3359.63	3856.93	5962.27	3672.51	2803.66	3499.64	4303.79
ENSG00000138668	HNRNPD	6184.96	7136.78	6201.4	5626.53	5852.15	5662.55	5711.66	5879.45
ENSG00000167552	TUBA1A	1538.06	1698.07	1464.33	1640.66	1209.88	2346.88	1621.57	818.513
ENSG00000008294	SPAG9	2463.7	2206.86	1680.08	1927.02	1598.08	1528.74	2010.61	2202.56
ENSG00000104904	OAZ1	4152.29	3446.9	3277.17	3919.22	4779.13	4486.44	3528.04	3663.68
ENSG00000102755	FLT1	124.354	306.873	75.2355	15.3056	65.2674	214.586	207.431	310.064
ENSG00000163565	IFI16	8212.02	9709.27	4533.49	5410.28	5707	9524.13	5337.25	5909.06
ENSG00000143322	ABL2	546.969	712.423	700.907	521.377	546.98	697.041	690.288	636.542
ENSG00000127951	FGL2	377.736	272.649	313.112	912.904	358.971	542.52	549.132	382.496
ENSG00000172216	CEBPB	82.7466	117.501	132.769	147.131	140.276	251.4	152.345	151.286
ENSG00000107317	PTGDS	2.80497	0	0	0	1.46121	0.968785	0.860708	3.92486
ENSG00000163191	S100A11	563.799	699.304	681.545	367.828	626.372	780.357	903.744	880.24
ENSG00000159167	STC1	16.8298	1.71119	0.553202	56.7788	9.25433	13.0786	11.1892	0.713612
ENSG00000069849	ATP1B3	748.46	1179.01	1140.15	466.08	635.627	780.357	910.629	847.771
ENSG00000112245	PTP4A1	1885.87	1946.76	2172.43	1415.03	1922.47	1923.04	1663.75	1513.57
ENSG00000123562	MORF4L2	1188.84	1199.54	1182.19	791.941	890.364	901.939	945.058	733.95
ENSG00000143321	HDGF	2723.16	3235.28	2478.9	2241.53	2829.88	2393.87	2230.09	2679.97
ENSG00000104765	BNIP3L	1855.49	947.426	2458.43	1097.07	4213.16	1155.28	1043.18	1247.75
ENSG00000176014	TUBB6	20.1023	35.3645	21.0217	12.3432	49.6812	42.1422	46.4782	34.6102
ENSG00000103187	COTL1	4421.1	6229.86	4032.84	3457.09	5778.11	4879.29	4089.22	7030.15
ENSG00000128342	LIF	71.5267	183.097	71.3631	254.764	45.7846	71.2057	260.795	118.46
ENSG00000122176	FMOD	2.80497	0	1.1064	7.89966	4.8707	3.39075	0	1.42722
ENSG00000164659	KIAA1324L	150.533	161.422	126.13	131.826	193.854	182.616	43.8961	171.98
ENSG00000148841	ITPRIP	546.969	485.406	642.821	381.652	777.851	493.596	563.764	627.978
ENSG00000116209	TMEM59	2199.1	2063.69	2130.38	2241.53	2349.14	2290.69	2032.13	2177.23
ENSG00000130508	PXDN	44.8795	0	18.8089	26.6613	11.2026	0	24.9605	6.42251
ENSG00000082781	ITGB5	29.4522	9.69672	34.8517	28.6363	16.0733	38.267	28.4034	16.4131
ENSG00000159399	HK2	168.298	223.595	1031.72	83.9339	1156.79	322.606	264.237	150.215
ENSG00000133026	MYH10	231.878	296.035	175.918	125.407	198.725	216.039	281.452	175.905
ENSG00000141756	FKBP10	4.67495	0	11.6172	17.7742	14.6121	3.39075	18.0749	5.70889
ENSG00000111817	DSE	114.069	150.584	115.619	38.5108	865.037	313.886	125.663	109.183
ENSG00000153113	CAST	3785.77	3467.43	4083.74	2712.05	3614.06	3715.78	3976.47	3370.03
ENSG00000079819	EPB41L2	92.0965	222.454	117.279	39.992	93.5175	114.801	164.395	132.375
ENSG00000196419	XRCC6	4375.29	5390.23	5328.44	4123.13	4786.93	3594.19	3945.49	4471.49
ENSG00000198408	OGA	14144.1	12848.7	11549.8	13290.7	10456.9	10939	11555	10613.5
ENSG00000116962	NID1	14.0249	14.2599	1.1064	5.92474	26.3018	36.3295	8.60708	7.49292
ENSG00000097033	SH3GLB1	2397.31	2482.93	2549.16	2472.59	2280.46	2049.47	2387.6	1977.06
ENSG00000104763	ASAH1	1054.2	739.802	923.294	1186.43	1019.92	1190.15	1018.22	871.32
ENSG00000173230	GOLGB1	4239.71	3830.2	2986.74	2572.33	3319.87	3344.25	3101.99	3620.87
ENSG00000163902	RPN1	1629.22	2076.81	1914.63	1738.91	1902.5	2264.54	1786.83	2087.67
ENSG00000262655	SPON1	104.719	154.007	177.025	46.9042	83.7761	131.27	167.838	44.6007
ENSG00000168374	ARF4	909.745	1367.81	1291.73	1041.77	1165.07	936.815	1143.02	1080.76
ENSG00000186591	UBE2H	1953.66	1852.07	1778.55	2316.08	2402.72	1721.05	2164.68	2056.99
ENSG00000136997	MYC	205.23	528.756	357.369	124.913	243.535	175.35	222.923	287.229
ENSG00000119508	NR4A3	140.249	385.587	650.013	206.872	493.889	394.78	573.232	536.993
ENSG00000153201	RANBP2	4292.07	5003.51	4435.58	3592.37	4252.12	3467.28	4208	3694.72
ENSG00000168066	SF1	9845.45	10157	7557.85	8198.86	6116.63	8268.1	7100.84	6068.55
ENSG00000206560	ANKRD28	1115.44	1599.39	1347.6	1011.16	945.403	1148.01	1077.61	1114.66
ENSG00000107796	ACTA2	216.45	238.425	211.876	417.694	204.569	237.837	284.034	254.759
ENSG00000198242	RPL23A	1473.54	1761.95	1441.64	1743.36	1872.3	1185.31	1276.43	1190.66
ENSG00000172493	AFF1	4415.02	4696.63	2999.46	3609.65	3511.78	3978.32	3873.19	3141.32
ENSG00000197157	SND1	1603.04	2282.15	2044.64	1766.56	1911.75	1547.15	1574.24	1866.81
ENSG00000139112	GABARAPL1	1757.31	699.304	1752.54	2137.35	1583.95	1520.51	1455.46	1400.46
ENSG00000113013	HSPA9	3503.88	4369.23	3496.24	2774.76	2872.74	3106.89	2929.85	3006.45
ENSG00000213719	CLIC1	1739.08	2461.25	2916.48	2166.48	2769.97	1550.06	2057.95	2249.3
ENSG00000181222	POLR2A	8001.64	7590.25	6134.46	6281.71	7099.05	7215.03	6519.86	7123.27
ENSG00000107263	RAPGEF1	4415.49	6883.53	4515.79	4165.59	5284.22	4852.65	5204.7	6431.43
ENSG00000077782	FGFR1	204.295	131.191	143.833	116.52	127.125	210.711	222.063	206.234
ENSG00000223865	HLA-DPB1	647.481	507.652	822.058	580.625	665.825	977.989	643.81	745.011
ENSG00000153250	RBMS1	1159.86	1463.06	1231.43	1146.44	1105.16	1128.63	956.247	1171.39
ENSG00000203747	FCGR3A	28.5172	0.570395	64.7247	17.2805	24.3535	19.8601	47.3389	8.20653
ENSG00000136238	RAC1	1867.18	2131.57	1860.42	1794.7	1743.71	2027.18	1787.69	1900.35
ENSG00000250722	SELENOP	20.1023	10.2671	9.40444	22.2178	7.79312	19.3757	5.16425	16.7699
ENSG00000112531	QKI	2047.16	2631.8	1950.04	1834.7	1696.47	2268.9	1676.66	1691.26
ENSG00000221978	CCNL2	5903.06	4550.04	4442.21	6088.66	3827.88	5527.89	5266.67	4907.15
ENSG00000169813	HNRNPF	3280.41	4658.99	4347.62	3992.78	4179.55	3590.8	4016.06	4365.88
ENSG00000196396	PTPN1	4217.27	4764.51	4437.79	2543.69	3323.77	3250.76	3982.5	3923.44
ENSG00000166888	STAT6	3635.71	4422.84	4895.29	3870.34	4015.89	4773.69	4090.09	3469.94
ENSG00000112078	KCTD20	2913.43	2789.8	3089.08	2400.01	3146.96	2211.25	2906.61	2633.23
ENSG00000119318	RAD23B	2143.93	2701.96	2835.16	2198.08	2806.01	2465.56	2396.21	2132.63
ENSG00000153827	TRIP12	7151.27	8586.73	6252.29	5247.35	6093.25	5496.4	6576.67	6462.82
ENSG00000154096	THY1	1.86998	9.12632	0	1.48119	11.6897	3.39075	0	0.356806
ENSG00000171867	PRNP	2150.48	2306.68	3641.73	1838.15	2147.49	2194.78	2434.94	1789.02
ENSG00000144810	COL8A1	0	0	0	9.38084	0.97414	1.45318	0.860708	1.78403
ENSG00000189067	LITAF	1367.42	1261.14	1301.13	1589.81	1729.1	1372.77	1439.96	1486.45
ENSG00000133030	MPRIP	4732.45	3988.77	4518	4957.04	5218.47	6334.89	5036	5443.79
ENSG00000174705	SH3PXD2B	18.2323	2.28158	11.064	14.8119	8.76726	88.6439	28.4034	9.27695
ENSG00000131873	CHSY1	536.217	958.264	1188.28	578.65	680.924	735.792	842.633	544.843
ENSG00000110047	EHD1	2719.89	3175.96	3194.19	4364.56	4105.03	3851.41	2768.04	3618.37
ENSG00000169554	ZEB2	885.903	1343.85	263.324	119.482	471.484	896.611	647.253	970.869
ENSG00000136295	TTYH3	500.22	697.023	686.524	865.506	835.325	738.214	1110.31	1271.66
ENSG00000074181	NOTCH3	84.6166	1.71119	13.2769	31.1049	34.0949	5.32832	24.9605	8.20653
ENSG00000134245	WNT2B	105.186	88.4112	159.322	93.3147	97.9011	82.8311	115.335	119.887
ENSG00000196628	TCF4	112.199	16.5415	55.3202	27.1551	102.285	85.2531	344.283	86.7038
ENSG00000129116	PALLD	37.3996	92.9744	28.7665	15.3056	28.2501	106.566	84.3494	30.6853
ENSG00000137193	PIM1	4606.7	6294.88	8142.58	2949.04	4029.04	4039.83	5518	4685.22
ENSG00000196914	ARHGEF12	2937.27	2915.29	2366.05	4096.47	2847.9	2105.17	3417.01	2529.04
ENSG00000136244	IL6	20.1023	0	2.21281	171.324	18.5087	3.39075	2.58212	1.78403
ENSG00000163527	STT3B	4333.68	4068.06	3698.71	2807.34	3180.08	2948.01	3674.36	3489.92
ENSG00000003402	CFLAR	12175.9	13023.8	11821.9	9033.75	9097.01	12702.7	11372.5	11067.8
ENSG00000143248	RGS5	52.8269	70.1586	17.1493	50.8541	32.6337	22.2821	10.3285	20.6947
ENSG00000111859	NEDD9	1534.32	2529.13	2025.83	1445.64	1818.23	898.064	1720.56	1754.41
ENSG00000067048	DDX3Y	5704.37	6473.98	5952.46	4074.74	4291.09	4123.15	3.44283	1.78403
ENSG00000114857	NKTR	12484	9306	9447.03	9845.44	7745.88	8651.25	11535.2	7910.74
ENSG00000182158	CREB3L2	2168.24	1589.12	2029.15	5663.56	2697.39	1787.41	3487.59	3545.94
ENSG00000105323	HNRNPUL1	5458.94	5033.74	4469.32	4658.82	6206.25	4709.75	4579.83	6802.15
ENSG00000109436	TBC1D9	48.152	6.27435	19.3621	6.41847	14.125	140.474	34.4283	23.5492
ENSG00000198959	TGM2	40.2046	0	210.217	97.2645	44.8105	162.756	293.501	37.1078
ENSG00000180353	HCLS1	8282.61	9623.71	8024.75	9756.08	9057.07	7710.56	7828.14	7730.56
ENSG00000100664	EIF5	7614.09	8385.38	4520.22	3232.44	3702.22	6111.58	3448.86	3008.94
ENSG00000116690	PRG4	468.43	75.2922	326.389	129.851	297.113	254.306	324.487	167.699
ENSG00000146648	EGFR	4.20746	9.12632	18.2557	6.9122	45.2975	2.90636	49.0604	53.8777
ENSG00000088832	FKBP1A	1380.51	1923.94	1791.27	1873.21	2078.82	1393.11	1817.82	1836.84
ENSG00000119707	RBM25	8529.45	8358.57	7930.15	8597.3	6727.9	7087.15	7358.19	6560.23
ENSG00000122545	SEPTIN7	4403.34	4892.85	4553.96	4050.55	4706.56	3668.31	4233.82	4170.7
ENSG00000274576	IGHV2-70	1.40249	0	0	0	0	0	0	17.1267
ENSG00000183087	GAS6	127.626	24.527	28.2133	175.274	84.7502	140.958	118.778	62.7978
ENSG00000108669	CYTH1	10369.5	9367.03	6002.24	5793.91	7881.77	8183.33	8206.85	8493.76
ENSG00000071537	SEL1L	2646.96	2423.04	2201.74	2001.08	2257.57	2058.67	2131.97	2279.28
ENSG00000129824	RPS4Y1	2378.15	2311.24	2487.75	3383.52	2572.22	1310.28	0	0
ENSG00000124172	ATP5F1E	1994.33	2403.07	2118.21	2673.05	2403.2	1663.4	2048.49	2043.07
ENSG00000144028	SNRNP200	9618.24	8598.14	6910.05	8387.96	8714.17	8025.9	9275.85	10294.6
ENSG00000126247	CAPNS1	2047.16	2477.23	2179.06	1906.29	2446.55	1656.14	1942.62	2231.11
ENSG00000197081	IGF2R	3515.1	4505.55	5094.44	5273.52	4545.83	2998.39	5036	4628.13
ENSG00000211934	IGHV1-2	31.7897	0	0	3.94983	0	0	0.860708	20.6947
ENSG00000136068	FLNB	2208.91	1925.08	2202.3	2208.94	4088.95	2409.85	2672.5	2717.08
ENSG00000126777	KTN1	3960.62	4548.9	4117.48	3176.65	3716.35	3411.09	3726.01	3568.42
ENSG00000155506	LARP1	3647.86	4476.46	4163.95	3756.78	3980.82	3910.5	3795.72	3762.16
ENSG00000122359	ANXA11	3471.15	3960.25	3617.94	3948.84	4055.35	3619.87	3432.5	3835.66
ENSG00000187479	C11orf96	1.40249	7.41514	5.53202	7.40593	2.43535	22.2821	3.44283	1.78403
ENSG00000103257	SLC7A5	2100.46	2962.06	2845.67	2643.92	2132.88	2756.19	3495.34	3362.9
ENSG00000139926	FRMD6	79.9416	23.9566	69.1503	14.8119	49.6812	38.267	97.26	68.1499
ENSG00000008513	ST3GAL1	1116.38	2097.91	2248.21	1152.86	2040.82	1802.43	2125.09	1954.94
ENSG00000130300	PLVAP	16.8298	14.8303	2.76601	4.93729	0	3.87514	0.860708	5.35209
ENSG00000135387	CAPRIN1	2712.41	3241.56	3278.28	2961.38	3171.31	2803.66	2954.81	2901.55
ENSG00000184840	TMED9	1043.92	1549.19	1287.3	1298.51	1255.18	1347.58	1220.48	1398.68
ENSG00000011422	PLAUR	50.957	3.42237	33.1921	15.7993	60.8838	394.296	106.728	78.1405
ENSG00000087274	ADD1	5528.6	5168.35	5578.49	5190.57	4851.22	5067.72	5013.63	5258.6
ENSG00000155659	VSIG4	0.93499	0	8.85124	6.41847	1.46121	3.87514	12.9106	1.07042
ENSG00000112697	TMEM30A	3204.68	3098.96	2685.24	3048.28	3430.44	2682.08	3026.25	2961.13
ENSG00000117525	F3	13.0899	0	30.9793	7.89966	55.526	8.23468	55.946	6.42251
ENSG00000114850	SSR3	1561.43	1680.95	1389.09	1394.78	1375.49	1394.57	1442.55	1542.47
ENSG00000104870	FCGRT	64.0468	62.7435	80.7675	55.2976	77.9312	172.928	107.589	84.2062
ENSG00000168710	AHCYL1	1809.67	1739.13	2310.17	1812.97	2056.9	1527.77	1859.13	2053.77
ENSG00000136826	KLF4	70.5917	82.1369	49.235	28.1425	36.5303	129.817	59.3889	16.7699
ENSG00000211640	IGLV6-57	102.381	0	0	0.493729	2.43535	0.968785	0	90.2719
ENSG00000127483	HP1BP3	5938.59	5171.77	6265.02	5641.84	5875.04	5743.93	6173.86	6678.33
ENSG00000024422	EHD2	6.07744	2.85198	7.74483	9.38084	9.25433	8.23468	45.6175	6.0657
ENSG00000177119	ANO6	1096.28	1185.85	1112.49	707.513	1236.67	1082.62	1093.1	971.225
ENSG00000138758	SEPTIN11	538.554	1222.36	1100.32	413.745	677.515	636.976	860.708	667.941
ENSG00000161921	CXCL16	43.9445	11.9783	98.47	26.1676	168.526	181.647	102.424	155.567
ENSG00000135506	OS9	2647.42	2404.22	2395.92	2397.05	2256.11	2479.61	2177.59	2412.36
ENSG00000146457	WTAP	2087.37	2619.82	1558.37	1757.67	1669.68	1801.94	1636.21	1600.63
ENSG00000138069	RAB1A	1276.73	1407.74	1397.94	1262.46	1452.93	1142.2	1262.66	1255.96
ENSG00000162493	PDPN	0	0	0.553202	0.987457	12.6638	66.8462	9.46779	1.07042
ENSG00000079246	XRCC5	5130.76	6014.82	5301.89	4385.79	4887.75	3974.93	4381.87	4369.8
ENSG00000076108	BAZ2A	7373.33	7852.06	6284.38	7959.4	6949.03	8074.34	6552.57	6167.39
ENSG00000136830	FAM129B	186.063	325.125	871.293	123.926	247.919	187.46	454.454	237.989
ENSG00000132824	SERINC3	2933.06	3020.24	3092.95	3048.77	3530.77	3026.49	3143.31	3140.25
ENSG00000167772	ANGPTL4	3.27247	2.28158	5.53202	30.1174	25.3276	6.2971	34.4283	9.63376
ENSG00000170759	KIF5B	4197.17	4682.94	4466.55	3366.74	3974.01	4184.67	4633.19	3352.19
ENSG00000183853	KIRREL1	12.6224	0.570395	0	18.7617	10.7155	2.90636	13.7713	0
ENSG00000260314	MRC1	32.7247	3.99277	111.194	21.7241	28.7371	52.3144	364.08	34.6102
ENSG00000109861	CTSC	2742.79	3067.58	2626.6	3886.14	2893.2	2040.26	4148.61	2906.9
ENSG00000171858	RPS21	2006.96	2238.23	2171.87	2287.44	2393.46	1718.63	1641.37	1585.29
ENSG00000144802	NFKBIZ	4942.36	6152.85	6320.89	2939.66	3232.2	3736.61	5611.82	4474.7
ENSG00000162704	ARPC5	2313.63	2583.32	2514.86	2138.83	3140.63	2439.4	2609.67	3124.19
ENSG00000198431	TXNRD1	1431	1528.66	1682.29	1378	1411.04	1839.24	1556.16	1516.07
ENSG00000182934	SRPRA	3675.91	3602.62	2962.95	3365.25	3278.96	3098.18	3195.81	3508.47
ENSG00000277443	MARCKS	47.6845	11.9783	29.3197	44.4356	46.2717	346.825	62.8317	42.4599
ENSG00000082153	BZW1	2677.34	4410.87	2885.5	2054.4	3202.97	2479.61	2363.5	2542.96
ENSG00000162407	PLPP3	13.5574	0	7.19163	4.44356	6.33191	35.8451	14.632	5.70889
ENSG00000154175	ABI3BP	5.14245	2.85198	4.97882	4.44356	2.92242	6.2971	5.16425	3.92486
ENSG00000168386	FILIP1L	13.5574	15.9711	9.95764	11.8495	6.33191	12.5942	12.0499	4.99528
ENSG00000106211	HSPB1	277.225	497.385	596.352	208.353	502.656	638.914	486.3	611.565
ENSG00000178607	ERN1	1544.6	1437.97	914.996	1873.7	1202.09	1640.64	1409.84	1746.92
ENSG00000169764	UGP2	3755.39	3262.09	3785.56	2532.33	2742.69	2597.31	3967	2699.59
ENSG00000157106	SMG1	10338.2	11813.5	9011.66	7694.76	9046.35	10911.4	11282.2	9372.93
ENSG00000173120	KDM2A	9638.34	11966.3	8852.34	7508.13	7935.35	9944.58	6699.75	7204.62
ENSG00000122958	VPS26A	969.117	1044.39	1022.32	866	826.071	808.936	1092.24	823.865
ENSG00000140416	TPM1	131.366	65.5954	132.215	198.479	106.181	132.724	156.649	114.178
ENSG00000122642	FKBP9	57.0344	36.5053	56.9798	38.5108	44.8105	50.8612	43.0354	20.3379
ENSG00000134247	PTGFRN	169.233	119.213	131.662	93.3147	178.755	45.0485	174.724	181.971
ENSG00000197324	LRP10	4213.07	4340.14	3755.14	3738.02	4217.54	5038.65	5167.69	4672.37
ENSG00000170571	EMB	7652.43	6586.92	5492.74	5209.82	5734.76	7237.8	5611.82	5246.47
ENSG00000170004	CHD3	9242.38	8792.07	11583.5	9701.77	9884.6	8985	9634.77	8031.34
ENSG00000150347	ARID5B	8914.66	7676.38	5080.61	5943.01	5783.96	6900.17	4535.07	4865.05
ENSG00000130707	ASS1	7.94742	2.85198	6.08522	2.46864	2.92242	0.968785	21.5177	3.21125
ENSG00000123989	CHPF	95.8365	200.779	174.259	161.943	270.324	221.852	211.734	341.106
ENSG00000213639	PPP1CB	3225.72	3850.74	4355.36	3102.59	3860.52	2793.01	3528.9	3533.09
ENSG00000145675	PIK3R1	3874.13	2914.72	4158.97	3265.03	5614.94	4508.24	3618.42	3523.46
ENSG00000158195	WASF2	3628.7	3178.81	3451.98	3245.28	3945.27	3631.98	3738.06	3936.64
ENSG00000097007	ABL1	985.48	853.311	730.227	676.902	862.114	778.903	872.758	1064
ENSG00000197043	ANXA6	3735.75	5307.53	4532.39	3555.83	5183.89	3639.24	3675.22	3968.04
ENSG00000123066	MED13L	2215.46	2635.8	1811.18	1787.79	1755.89	1694.41	1856.55	1892.5
ENSG00000144224	UBXN4	5084.48	4803.3	4648.56	4410.97	4636.91	4169.17	4487.73	4425.82
ENSG00000165029	ABCA1	393.631	70.729	165.407	1485.14	296.626	199.085	164.395	36.3942
ENSG00000108518	PFN1	3530.99	6723.25	6038.2	4564.03	4871.68	3698.34	4452.44	4271.32
ENSG00000152558	TMEM123	8969.83	9360.18	7793.51	5858.09	7598.78	9041.67	7223.06	8267.19
ENSG00000177697	CD151	129.496	403.84	233.451	262.17	207.492	139.989	341.701	427.453
ENSG00000076706	AP002956.1	238.422	251.544	373.411	366.84	342.897	235.415	352.89	292.224
ENSG00000130175	PRKCSH	3276.21	3035.07	2888.82	3490.17	3271.16	3432.89	2757.71	3108.14
ENSG00000110880	CORO1C	612.886	766.611	614.608	299.693	786.618	849.14	901.161	804.954
ENSG00000183291	SELENOF	2501.57	2774.4	2517.07	2060.33	2765.58	2205.44	2069.14	2312.1
ENSG00000159216	RUNX1	4579.58	4389.19	4518.56	2754.02	3051.01	2737.3	3619.28	3286.9
ENSG00000111642	CHD4	4954.51	6028.51	5922.03	4674.62	6140.49	5219.33	5524.02	5927.97
ENSG00000120705	ETF1	1699.34	2620.4	1698.33	1330.1	1464.62	1483.21	1538.09	1517.5
ENSG00000145495	MARCHF6	5983.47	5958.92	4799.03	5585.06	4506.86	4601.73	5542.1	5135.15
ENSG00000010610	CD4	12535.9	11956.1	11571.3	12193.6	14869.8	11463.2	10659.9	11779.9
ENSG00000153071	DAB2	10.2849	0	24.8941	7.89966	10.2285	93.9722	28.4034	12.845
ENSG00000111885	MAN1A1	1276.26	1631.9	1722.12	1911.72	1499.2	1344.19	1508.82	1715.52
ENSG00000173918	C1QTNF1	3.73996	5.70395	0.553202	16.293	2.92242	75.0809	0.860708	1.07042
ENSG00000244038	DDOST	1878.4	2250.78	1626.41	1914.68	2045.21	1931.27	1784.25	1940.67
ENSG00000174231	PRPF8	5650.61	5940.66	5673.64	5719.85	5130.8	3833.97	6074.88	6669.77
ENSG00000163479	SSR2	1818.56	1713.47	1562.24	1977.38	1982.38	1528.26	1392.63	1542.11
ENSG00000069122	ADGRF5	18.6998	7.98553	11.064	19.7491	0	0	19.7963	1.78403
ENSG00000086598	TMED2	1727.86	2351.17	1724.33	1478.22	1710.59	1610.12	1531.2	1619.54
ENSG00000174348	PODN	0	0	0	0	0	0	0	0.713612
ENSG00000105401	CDC37	2456.69	3041.92	3248.4	3043.34	2741.72	2407.43	2552.86	2702.09
ENSG00000124783	SSR1	2277.64	2378.55	2226.64	2286.46	2473.34	2306.68	2267.11	2007.39
ENSG00000132334	PTPRE	867.671	923.47	840.867	918.829	747.166	733.855	1006.17	923.057
ENSG00000134884	ARGLU1	7108.73	6035.92	6482.98	8010.75	6532.1	7541.99	7060.39	6538.47
ENSG00000120742	SERP1	1869.05	1924.51	1977.7	1768.04	2139.7	1823.25	1808.35	1795.09
ENSG00000124486	USP9X	3698.35	4088.02	3385.04	2955.46	3727.06	2698.55	4457.61	4982.79
ENSG00000140319	SRP14	2500.16	2579.9	2264.26	2249.43	2617.03	2133.75	1978.77	2354.56
ENSG00000197405	C5AR1	15.8948	18.2526	37.6178	5.43102	18.5087	87.1907	25.8212	23.1924
ENSG00000257923	CUX1	507.7	631.427	524.436	563.838	557.208	477.611	432.936	506.307
ENSG00000012660	ELOVL5	3633.37	4496.99	4180	3518.8	4489.33	3514.27	4516.14	3675.1
ENSG00000167986	DDB1	3191.59	3831.34	3280.49	3355.38	3416.31	2899.57	3262.94	3763.59
ENSG00000099250	NRP1	21.5048	0.570395	54.2138	33.5735	32.6337	73.6277	85.2101	22.4788
ENSG00000110958	PTGES3	3955.48	4225.49	4601.54	3557.31	4068.01	3272.07	3288.77	3428.19
ENSG00000124193	SRSF6	6772.6	7139.06	5589.56	5163.41	4845.37	5613.63	4601.35	4608.15
ENSG00000051523	CYBA	3345.39	3373.89	3636.2	3743.45	4406.52	4707.81	4245.01	5443.79
ENSG00000131171	SH3BGRL	2799.36	2109.32	2140.34	2936.2	3052.47	1957.92	2273.13	2037
ENSG00000132424	PNISR	10565.9	8534.25	7705.55	9486.01	7795.56	9135.65	7863.43	7230.31
ENSG00000104517	UBR5	7943.68	6679.9	6083.56	6854.93	7213.51	5541.45	6498.35	6619.82
ENSG00000100243	CYB5R3	818.116	1184.14	864.655	839.339	977.063	1104.42	1001.86	1176.75
ENSG00000143774	GUK1	1483.83	1697.5	2003.15	1897.89	2124.6	1906.09	1748.96	1939.95
ENSG00000163220	S100A9	5.14245	0	50.8946	8.88712	42.3751	92.519	36.1497	34.967
ENSG00000177885	GRB2	3884.42	4212.37	3839.78	3585.95	4278.42	4113.95	3738.06	3914.87
ENSG00000133318	RTN3	1292.62	1042.11	1399.6	1244.2	1710.59	1159.15	1302.25	1278.44
ENSG00000178573	MAF	13669.1	9424.07	9098.52	8382.52	9292.32	9020.84	13779.9	10799.4
ENSG00000117335	CD46	5977.86	5022.9	4321.06	4417.88	4984.19	4388.6	5530.91	4785.12
ENSG00000127314	RAP1B	2676.88	2905.59	2589.54	1838.15	1976.04	2287.3	2628.6	2290.34
ENSG00000165527	ARF6	3875.53	5365.71	5565.77	3569.66	4625.71	3893.06	4403.38	5198.3
ENSG00000116489	CAPZA1	3924.15	4433.11	4394.64	3739.01	4278.42	3479.88	3578.82	3930.93
ENSG00000198830	HMGN2	3657.68	3159.99	2657.03	3924.65	3556.59	3898.39	2904.89	3381.09
ENSG00000145012	LPP	2009.76	2433.88	2207.83	1282.21	1320.93	990.583	2150.91	1487.88
ENSG00000108256	NUFIP2	3466.94	4000.75	3448.66	3829.36	3628.19	4058.73	4154.64	3591.96
ENSG00000156515	HK1	2465.57	3255.82	3443.68	2272.14	3096.79	2238.86	2946.2	3355.76
ENSG00000064932	SBNO2	4191.56	6140.3	4316.08	3490.17	3531.75	4904.48	5279.58	5738.87
ENSG00000167468	GPX4	1186.03	937.73	928.827	984.989	1364.77	986.708	790.13	1003.34
ENSG00000173442	EHBP1L1	2970	4831.25	4084.29	3966.12	3754.34	3026.97	3571.08	4695.21
ENSG00000079332	SAR1A	1668.02	1886.3	1457.13	1278.26	1223.52	1494.35	1259.22	1209.21
ENSG00000095139	ARCN1	2200.03	2972.33	2759.93	2381.75	2527.41	1986.49	2527.04	2400.59
ENSG00000205581	HMGN1	4567.89	4332.72	3543.81	4175.96	4538.03	4441.4	4226.08	4532.86
ENSG00000118855	MFSD1	576.889	548.72	533.84	625.06	540.648	599.194	536.221	653.668
ENSG00000166482	MFAP4	6.54493	11.9783	16.0429	4.44356	8.28019	7.26589	6.88567	4.28167
ENSG00000106948	AKNA	10100.2	9742.35	10040.6	11885.5	10553.8	9460.19	9967.86	10824.1
ENSG00000130340	SNX9	2347.76	2271.31	2444.05	2529.37	2648.69	2249.04	2918.66	3748.96
ENSG00000086061	DNAJA1	3013.94	5405.63	3465.26	1726.08	1857.69	3585.47	2115.62	1801.87
ENSG00000096433	ITPR3	2706.8	3407.54	3356.83	2093.9	2743.18	3115.61	3749.24	3695.44
ENSG00000144655	CSRNP1	2426.77	3201.63	5004.82	889.205	1972.63	2807.54	2394.49	1491.09
ENSG00000068366	ACSL4	1994.8	2612.98	3003.33	2127.48	1855.74	1783.05	2309.28	2258.94
ENSG00000155660	PDIA4	906.473	1161.32	1402.37	1247.16	1130.98	1174.17	1213.6	1399.75
ENSG00000107738	VSIR	839.154	1147.63	986.36	875.381	1085.19	1010.44	1118.06	671.152
ENSG00000130723	PRRC2B	5091.96	4846.08	4151.23	5593.45	4637.88	4813.41	4808.78	5903.71
ENSG00000100221	JOSD1	3090.14	2160.66	4160.08	2147.72	4437.21	2864.21	3553	3831.02
ENSG00000253729	PRKDC	4281.79	5257.33	4216.51	3910.33	4150.32	3160.18	4152.06	4512.17
ENSG00000158615	PPP1R15B	4387.44	4965.29	4628.64	2707.61	3039.32	4446.24	3582.27	2890.48
ENSG00000173334	TRIB1	2376.74	1807.01	1558.37	1904.31	1803.13	1711.36	788.409	1058.29
ENSG00000177733	HNRNPA0	2693.71	2942.67	2617.75	2637.5	2883.94	2638.49	2592.45	2829.83
ENSG00000153317	ASAP1	647.013	901.795	603.544	549.026	694.562	616.147	585.282	507.735
ENSG00000090621	PABPC4	1750.3	1768.8	1989.87	1652.51	1349.67	1641.12	1554.44	1301.98
ENSG00000088882	CPXM1	19.1673	1.14079	16.5961	16.7868	26.3018	8.23468	38.7319	36.0374
ENSG00000132341	RAN	2125.23	3300.31	2690.78	1903.82	2216.66	2256.79	2121.65	2445.9
ENSG00000169756	LIMS1	2101.86	2207.43	1921.27	1787.79	2686.68	2050.92	2895.42	2382.75
ENSG00000179222	MAGED1	589.511	568.684	612.948	703.563	762.265	394.296	591.307	732.166
ENSG00000124107	SLPI	28.0497	0	2.76601	0.493729	17.0475	0.968785	5.16425	0.713612
ENSG00000049540	ELN	2.80497	0	0	2.46864	2.43535	0.484393	0.860708	1.07042
ENSG00000076928	ARHGEF1	12200.7	12911.5	12338.6	16534.5	12045.7	13630.3	13914.2	12154.2
ENSG00000128245	YWHAH	1081.32	1174.44	1497.52	1776.44	1572.75	1275.41	1135.27	1363.36
ENSG00000054654	SYNE2	28075.9	19913.6	11597.3	18672.8	20330.3	28076.9	24215.2	20776.4
ENSG00000005483	KMT2E	6142.88	6459.15	5463.43	4620.31	6003.14	5527.89	5184.91	4540.35
ENSG00000131504	DIAPH1	7515.92	8132.12	8311.86	6593.25	7747.83	6109.16	7809.21	7915.74
ENSG00000136240	KDELR2	519.387	649.68	672.141	642.835	610.299	634.554	581.839	509.876
ENSG00000170248	PDCD6IP	3257.04	2935.25	3035.97	3387.47	2954.08	2806.57	3421.31	3142.03
ENSG00000104805	NUCB1	2011.16	2553.66	1998.72	1622.89	2145.54	1985.53	2016.64	2528.33
ENSG00000135926	TMBIM1	1047.66	1213.23	1657.39	1267.4	1400.33	1396.02	1507.96	1180.67
ENSG00000055483	USP36	2462.3	1804.16	1788.5	1868.27	1983.84	1897.37	2253.33	2101.59
ENSG00000163041	H3F3A	2367.39	2228.53	1855.44	1992.69	2043.75	2203.99	2193.95	2150.11
ENSG00000005893	LAMP2	1723.65	1846.37	1458.24	1409.6	1627.79	2004.9	1861.71	1715.52
ENSG00000038382	TRIO	129.029	112.938	183.11	74.0593	230.871	198.601	244.441	189.464
ENSG00000138757	G3BP2	6110.16	5840.28	5650.41	3403.27	5504.87	3778.75	5642.8	4785.84
ENSG00000108424	KPNB1	5835.74	6537.3	4540.13	3801.22	4490.3	5321.05	4312.15	3981.95
ENSG00000157933	SKI	2266.42	2354.02	2804.74	1848.03	2344.76	2648.66	2858.41	2598.62
ENSG00000135316	SYNCRIP	3070.97	4449.08	3456.41	2852.27	3157.19	2827.88	3318.89	3051.4
ENSG00000115875	SRSF7	7486.93	7818.98	6772.85	7037.11	4813.71	6765.03	6189.35	5400.61
ENSG00000155090	KLF10	913.485	1111.13	783.334	593.462	517.269	609.366	366.662	489.894
ENSG00000205339	IPO7	1790.04	2642.07	2253.19	1677.2	1921.98	1861.52	1850.52	1349.8
ENSG00000082397	EPB41L3	40.2046	0	38.171	21.2303	43.3492	124.005	55.0853	20.6947
ENSG00000099331	MYO9B	3764.74	4651	4067.7	3959.21	3762.62	4073.74	4698.61	5003.13
ENSG00000168214	RBPJ	6239.66	7570.28	4170.04	2970.27	4652.01	4219.54	5059.24	6253.38
ENSG00000115935	WIPF1	14915.4	11601.3	11170.3	14786.7	16569.6	16438.8	13150.8	12913.9
ENSG00000196352	CD55	475.442	624.012	633.97	80.4778	501.682	655.383	670.492	442.796
ENSG00000101347	SAMHD1	6960.07	8941.51	7043.92	5528.28	5567.7	5333.16	7480.41	5601.14
ENSG00000170315	UBB	1349.19	3122.34	2423.03	2115.63	1981.89	2044.62	1969.3	1844.33
ENSG00000140943	MBTPS1	2864.34	2695.12	2622.18	2863.63	2479.19	2965.94	2902.31	2365.27
ENSG00000184371	CSF1	2228.08	1965.58	4784.09	6489.57	2798.22	2600.7	4466.21	3767.51
ENSG00000108828	VAT1	634.391	438.063	488.478	580.131	678.976	529.926	505.236	586.232
ENSG00000100647	SUSD6	4441.67	4899.69	4257.44	3000.39	3647.18	4397.32	4965.43	4031.19
ENSG00000170581	STAT2	7576.69	10875.2	4265.19	3524.24	3927.73	12836.9	5130.68	5620.76
ENSG00000013364	MVP	3738.56	5358.86	4863.75	3844.17	3687.12	5240.16	4454.16	4682.01
ENSG00000064393	HIPK2	905.07	1793.32	720.269	1413.05	879.162	844.781	1556.16	1857.89
ENSG00000134686	PHC2	575.954	659.377	617.927	718.869	778.825	796.826	685.984	716.109
ENSG00000105339	DENND3	715.735	1011.31	1212.62	317.961	617.118	560.442	932.147	813.161
ENSG00000198961	PJA2	3259.38	2886.77	3600.79	2649.35	3292.11	2108.08	3058.96	2935.8
ENSG00000162772	ATF3	145.858	178.534	112.3	29.13	28.7371	141.927	77.4637	21.7652
ENSG00000057608	GDI2	2863.87	3282.05	3164.87	2699.71	3417.77	2713.57	3021.09	3022.86
ENSG00000162923	WDR26	7087.69	6185.93	5636.02	6201.23	6152.67	5260.5	5668.62	5362.43
ENSG00000022267	FHL1	48.6195	161.992	95.1508	17.7742	93.0304	93.9722	133.41	85.6334
ENSG00000132470	ITGB4	20.1023	9.12632	49.7882	11.8495	80.8536	7.75028	112.753	19.9811
ENSG00000004799	PDK4	9.3499	0	11.064	16.7868	5.84484	15.0162	22.3784	6.42251
ENSG00000197965	MPZL1	114.069	157.999	99.5764	54.3102	120.306	170.991	142.878	123.455
ENSG00000141526	SLC16A3	424.953	485.406	1443.86	496.197	1836.74	690.26	747.955	1163.9
ENSG00000180370	PAK2	7696.37	7705.47	7970.54	5481.38	7049.37	5192.21	7946.92	7076.89
ENSG00000125107	CNOT1	5421.07	5145.53	5073.97	4451.95	5179.99	5043.5	5449.14	5547.97
ENSG00000029363	BCLAF1	6842.72	6398.69	4508.04	4474.66	4602.81	5648.02	4535.07	4815.09
ENSG00000002834	LASP1	4412.22	4771.35	5805.86	6319.73	5948.59	5142.8	5857.12	6075.69
ENSG00000101608	MYL12A	1846.14	2943.24	2677.5	2171.42	2274.13	2161.84	2069.14	2448.04
ENSG00000181143	MUC16	15.8948	21.1046	32.0857	3.4561	15.0992	1.45318	26.682	19.6243
ENSG00000196235	SUPT5H	5706.24	6896.08	5392.62	5077.01	4792.77	5666.91	4745.08	5084.48
ENSG00000162889	MAPKAPK2	3640.38	4113.69	2896.01	3971.06	3703.19	3521.05	3048.63	3444.25
ENSG00000138356	AOX1	0.93499	0	2.76601	0.493729	7.79312	1.93757	1.72142	4.63848
ENSG00000110324	IL10RA	12297	9018.52	10478.2	18429.9	8352.28	9638.45	11714.2	8051.32
ENSG00000135127	BICDL1	4579.11	2906.16	2239.92	2980.64	3701.25	5292.47	3180.32	4446.16
ENSG00000141959	PFKL	2762.43	2498.9	3052.02	2928.8	4162.99	2923.79	3091.66	3412.13
ENSG00000138722	MMRN1	4.20746	2.85198	11.064	38.5108	3.89656	0.968785	10.3285	2.85445
ENSG00000143162	CREG1	175.778	301.169	236.217	223.659	293.216	871.422	279.73	220.149
ENSG00000082438	COBLL1	27.5822	0	6.08522	3.94983	5.84484	0	12.0499	11.4178
ENSG00000099204	ABLIM1	2894.73	1364.96	2198.98	1544.38	2365.21	4073.74	3007.31	3314.01
ENSG00000141522	ARHGDIA	1977.5	2722.5	2672.52	2444.45	2116.81	2809.96	2515.85	2630.37
ENSG00000159335	PTMS	249.175	395.284	283.24	236.002	345.333	483.424	492.325	404.618
ENSG00000049239	H6PD	1181.36	1082.61	1129.64	1477.24	1784.14	1512.76	1246.31	1756.2
ENSG00000198355	PIM3	1448.77	2613.55	1681.18	1141.01	1165.56	1909.48	1442.55	1402.6
ENSG00000027697	IFNGR1	593.251	581.233	928.827	492.741	602.993	548.817	717.831	587.302
ENSG00000019144	PHLDB1	19.6348	37.0757	37.6178	26.1676	27.763	32.9387	24.9605	12.4882
ENSG00000184432	COPB2	1648.85	1833.25	2120.42	1660.41	2068.1	1598.98	1853.1	2100.52
ENSG00000145730	PAM	2198.16	1370.09	2029.7	2261.28	1862.07	1166.42	1665.47	1837.19
ENSG00000108848	LUC7L3	6450.5	4929.92	4768.05	5876.85	5161.48	5291.99	5154.78	5411.67
ENSG00000006125	AP2B1	4056.45	4708.61	4594.34	4410.48	4206.34	4275.25	4189.93	4556.41
ENSG00000147677	EIF3H	2992.9	3017.39	2804.74	3264.53	3397.8	2240.8	2308.42	2296.05
ENSG00000131724	IL13RA1	35.9971	42.7796	31.5325	15.7993	35.0691	105.598	76.603	47.812
ENSG00000164932	CTHRC1	9.3499	5.13356	8.85124	3.94983	4.8707	7.75028	1.72142	4.63848
ENSG00000273749	CYFIP1	464.69	842.474	385.029	337.217	594.713	390.905	596.471	739.302
ENSG00000125304	TM9SF2	3984.93	3863.86	3761.22	3588.42	3522.98	3190.21	4063.4	3639.42
ENSG00000049449	RCN1	122.951	238.425	156.003	170.83	142.224	194.241	179.888	160.919
ENSG00000130775	THEMIS2	339.401	295.465	534.947	628.517	686.769	541.067	683.402	809.236
ENSG00000233276	GPX1	727.89	581.803	778.909	1059.54	840.683	712.542	829.723	649.03
ENSG00000163347	CLDN1	45.347	0	13.2769	0.987457	21.9182	0.484393	16.3535	9.99056
ENSG00000111716	LDHB	3734.82	4712.6	4487.02	4767.44	5778.11	3412.55	3553	3679.03
ENSG00000118689	FOXO3	651.688	517.348	658.311	741.087	822.174	633.586	571.51	493.462
ENSG00000147649	MTDH	2842.84	3464.58	3279.94	2665.64	3193.72	2666.1	2985.8	2885.49
ENSG00000112308	C6orf62	5573.48	5964.05	4586.6	5096.27	6498.98	7721.22	5001.58	5354.94
ENSG00000010818	HIVEP2	3159.8	4431.4	3836.46	2962.37	3321.33	3520.08	3149.33	2555.44
ENSG00000196526	AFAP1	337.064	727.254	562.607	120.964	478.303	682.025	803.901	610.495
ENSG00000197879	MYO1C	495.077	581.233	744.61	658.634	675.566	552.208	862.43	973.366
ENSG00000100280	AP1B1	1177.15	1404.31	1522.41	1235.8	1193.32	1358.72	1300.53	1518.57
ENSG00000182220	ATP6AP2	1634.83	1655.29	1514.11	1611.04	1767.58	1492.41	1701.62	1576.01
ENSG00000092964	DPYSL2	553.514	625.723	1016.23	677.396	720.377	608.397	701.477	637.969
ENSG00000105887	MTPN	2349.16	2782.96	2476.69	1927.02	2448.01	2001.99	2142.3	2270.36
ENSG00000010278	CD9	114.536	142.599	76.8951	41.4732	177.294	74.5965	281.452	154.14
ENSG00000120690	ELF1	5358.9	4755.95	3661.65	4771.39	4703.64	5321.05	4167.55	3729.69
ENSG00000112902	SEMA5A	0.93499	0	2.76601	2.46864	0	2.90636	0	0.356806
ENSG00000109320	NFKB1	1352.93	1967.86	2785.37	1655.97	1855.25	1356.3	2053.65	2323.16
ENSG00000115415	STAT1	15976.2	24338.2	9186.48	12447.4	11118.4	20658.9	13620.7	15689.8
ENSG00000145907	G3BP1	3756.32	4223.21	3772.29	3589.9	3637.93	4028.21	3775.07	3421.41
ENSG00000176915	ANKLE2	2689.5	4183.28	3185.34	2084.52	2239.06	2919.43	3011.62	2779.87
ENSG00000163346	PBXIP1	23209.3	13879.4	8644.34	21499.4	23233.2	18059.1	15597.8	15289.1
ENSG00000168003	SLC3A2	3102.3	2930.69	2896.57	2069.22	2620.92	4961.63	2612.25	2558.3
ENSG00000137409	MTCH1	2374.87	2188.04	2066.21	2196.6	2271.21	2506.73	2161.24	2355.63
ENSG00000173517	PEAK1	583.434	429.507	530.521	403.376	547.467	341.012	511.261	465.632
ENSG00000088448	ANKRD10	5094.29	5386.81	5533.13	6854.93	4719.71	4802.75	4354.32	4321.63
ENSG00000075618	FSCN1	66.3843	65.5954	47.0222	7.89966	171.449	385.092	141.156	114.891
ENSG00000131143	COX4I1	3926.49	3299.74	2847.88	2957.43	3621.37	3015.34	2370.39	3391.08
ENSG00000197622	CDC42SE1	3672.64	4380.06	4998.74	6242.71	4536.57	5131.66	4708.93	4318.42
ENSG00000147274	RBMX	5042.87	5614.4	4239.74	4122.14	3823.01	3710.45	4159.8	3675.1
ENSG00000100813	ACIN1	7055.43	7098.57	6576.47	7911.01	6355.29	7460.13	6189.35	6074.62
ENSG00000065526	SPEN	4173.8	5168.35	4950.05	3592.86	3655.95	4330.95	4474.82	3961.62
ENSG00000137497	NUMA1	7901.6	5852.82	6434.85	8110.97	7797.51	7580.75	6974.32	6917.39
ENSG00000132002	DNAJB1	3904.05	3095.53	3435.94	2416.8	2495.26	3259.96	2649.26	1473.96
ENSG00000101596	SMCHD1	16471.3	21070.4	15402.3	9214.46	10565.5	21415.5	14059.7	10297.1
ENSG00000167202	TBC1D2B	3304.25	2751.02	2546.94	2106.74	3028.6	3212.49	3273.27	3219.46
ENSG00000116260	QSOX1	853.178	1012.45	957.04	1042.26	1027.23	1083.59	1057.81	1058.29
ENSG00000158470	B4GALT5	1292.16	1699.78	1031.17	693.689	625.398	1232.29	1269.54	1266.3
ENSG00000160551	TAOK1	4225.69	4524.37	3817.1	2819.19	3716.35	3469.22	3985.08	3099.93
ENSG00000155096	AZIN1	2194.89	2838.29	3069.17	2045.02	2549.33	2570.67	2702.62	2196.5
ENSG00000181789	COPG1	1297.3	1440.82	1518.54	1579.93	1437.83	1504.52	1656.86	1753.34
ENSG00000144674	GOLGA4	2432.38	3021.38	1724.33	1464.4	1662.86	1774.81	1739.49	1933.89
ENSG00000187446	CHP1	908.343	975.946	832.569	630.491	842.631	690.26	776.359	738.231
ENSG00000078808	SDF4	2479.59	3487.97	4018.46	2570.35	3533.21	2597.31	3189.78	3863.49
ENSG00000106991	ENG	200.555	126.057	244.515	251.308	178.755	378.795	263.377	232.994
ENSG00000105223	PLD3	976.597	752.922	881.804	1111.38	1161.66	1236.17	1052.65	1123.22
ENSG00000111341	MGP	21.0373	18.823	5.53202	4.44356	3.40949	2.90636	5.16425	2.49764
ENSG00000187079	TEAD1	62.6443	27.379	32.0857	3.4561	28.2501	16.9537	135.131	19.6243
ENSG00000110367	DDX6	8118.05	8832	6648.94	7920.39	7967.98	6730.64	7216.18	6858.17
ENSG00000140526	ABHD2	2534.29	3242.7	2086.13	1866.79	2234.68	2432.14	2639.79	2623.95
ENSG00000020577	SAMD4A	83.6816	209.905	216.855	87.39	83.289	56.1895	115.335	145.22
ENSG00000073849	ST6GAL1	2376.74	2412.2	2309.07	2245.48	2721.75	2791.07	2589.01	2151.9
ENSG00000144824	PHLDB2	51.4245	42.2092	53.6606	39.0046	68.1898	32.4543	56.8067	108.826
ENSG00000109814	UGDH	195.413	228.158	272.729	290.312	301.009	210.711	236.695	355.735
ENSG00000084636	COL16A1	1.86998	2.28158	0	16.293	5.35777	1.45318	3.44283	1.78403
ENSG00000174807	CD248	0	0	0.553202	0	4.38363	3.87514	0.860708	1.07042
ENSG00000184014	DENND5A	449.73	787.145	186.982	170.336	412.061	517.331	284.034	255.473
ENSG00000130309	COLGALT1	958.365	1123.11	1178.87	1208.15	951.735	1404.74	1199.83	1071.84
ENSG00000197226	TBC1D9B	1743.29	2463.54	2083.91	1488.1	2265.36	2072.23	2096.69	1696.25
ENSG00000160271	RALGDS	6399.07	7607.93	5981.22	8061.11	6784.4	7443.18	6485.44	8086.65
ENSG00000113719	ERGIC1	1230.45	1147.63	1229.22	1627.82	1443.68	1392.63	1042.32	1084.69
ENSG00000180398	MCFD2	979.402	1027.85	995.764	970.177	1051.1	943.113	849.519	901.648
ENSG00000099783	HNRNPM	3790.45	4783.33	4484.81	4131.52	3396.83	3600.98	3426.48	3651.91
ENSG00000175166	PSMD2	2523.54	2834.86	2543.07	2429.64	2544.94	2586.66	2480.56	2723.14
ENSG00000124201	ZNFX1	4388.38	6783.14	2643.75	2811.78	2810.88	5850.01	3082.2	3368.25
ENSG00000087365	SF3B2	4574.44	4764.51	3976.97	4079.19	3974.49	4344.52	3545.26	3703.64
ENSG00000179295	PTPN11	2161.23	2898.75	2675.84	1860.86	2476.75	2237.41	2657.87	2664.63
ENSG00000061676	NCKAP1	306.209	345.089	206.898	133.8	291.755	183.585	258.212	227.642
ENSG00000008952	SEC62	1546.01	1664.98	1791.27	1502.91	1608.31	1411.52	1585.42	1508.58
ENSG00000108175	ZMIZ1	780.717	1954.74	1193.81	1121.75	1685.75	801.185	1056.09	2028.8
ENSG00000168477	TNXB	41.6071	10.8375	34.8517	59.7412	54.5519	41.6578	58.5282	44.2439
ENSG00000111252	SH2B3	289.379	697.023	576.437	284.388	203.595	482.939	488.022	203.736
ENSG00000109111	SUPT6H	4297.21	4514.68	3910.59	3739.5	3903.38	4065.02	3880.07	3708.64
ENSG00000108953	YWHAE	762.017	1220.08	1247.47	1057.07	964.399	949.894	1050.06	1158.19
ENSG00000047410	TPR	8415.85	8421.31	7991.56	7060.32	7283.16	6443.39	8064.84	6889.21
ENSG00000058673	ZC3H11A	6144.29	6232.71	5756.62	5372.26	6642.18	5583.11	5418.16	5224.35
ENSG00000118257	NRP2	22.9073	1.14079	32.6389	33.0798	17.5345	188.429	43.0354	22.8356
ENSG00000114019	AMOTL2	31.7897	2.85198	13.8301	1.48119	12.6638	0.484393	16.3535	2.49764
ENSG00000103335	PIEZO1	3368.3	4095.44	3809.9	3764.68	3688.58	3072.99	3974.75	4960.31
ENSG00000130600	H19	0	0	0	0	0	0	0	0
ENSG00000132274	TRIM22	19625.4	19499.5	7945.09	14564.5	8379.56	30731.8	10084.1	7933.93
ENSG00000111676	ATN1	1964.88	2599.86	1977.14	1510.81	2003.81	1407.65	1785.11	2395.24
ENSG00000128918	ALDH1A2	3.27247	6.84474	13.8301	0.493729	3.40949	1.93757	7.74637	4.99528
ENSG00000148926	ADM	4.20746	0	7.74483	9.87457	27.763	49.4081	37.0105	2.49764
ENSG00000077157	PPP1R12B	955.56	610.323	715.844	1918.14	993.623	911.627	936.45	1077.91
ENSG00000203875	SNHG5	719.475	1465.92	1193.26	559.395	1495.79	1299.14	1322.91	467.772
ENSG00000100353	EIF3D	2619.37	2737.33	2939.72	3091.73	3110.92	2180.25	2233.54	2428.42
ENSG00000196776	CD47	4206.99	3931.73	3797.73	3528.68	3398.29	4579.45	4482.57	3803.19
ENSG00000080503	SMARCA2	4733.85	7192.68	3705.35	3643.22	4074.34	4798.39	4708.93	5447.71
ENSG00000163349	HIPK1	3965.76	5572.76	3444.79	2799.94	3596.53	3538	3211.3	2658.56
ENSG00000150961	SEC24D	593.251	731.817	718.056	481.879	879.649	550.27	615.406	679.002
ENSG00000160209	PDXK	1086.93	1083.75	1614.8	1155.33	1438.32	1334.99	1163.68	1401.18
ENSG00000120899	PTK2B	2095.31	2769.84	2996.7	3528.68	2472.37	2933.97	2694.88	2634.3
ENSG00000077238	IL4R	3672.17	5373.69	8260.42	3342.05	5335.37	3549.15	5301.96	5833.42
ENSG00000128989	ARPP19	5198.54	5398.22	4343.19	4110.29	4274.53	3933.27	4386.17	4188.54
ENSG00000198231	DDX42	2987.76	2885.06	2943.59	3004.34	3015.94	3210.55	3145.89	2975.76
ENSG00000140941	MAP1LC3B	2062.59	1907.97	1607.61	1473.78	1778.78	1667.28	1419.31	1845.4
ENSG00000140564	FURIN	14326.4	25437.3	10559.5	7710.56	17206.2	16055.7	14608.8	29038.3
ENSG00000018408	WWTR1	154.273	135.184	100.683	141.206	262.531	191.335	106.728	201.238
ENSG00000162733	DDR2	31.7897	22.8158	11.6172	8.88712	16.0733	26.6416	21.5177	11.4178
ENSG00000143226	FCGR2A	3.73996	4.56316	15.4897	11.8495	21.4311	48.9237	25.8212	13.5586
ENSG00000112562	SMOC2	0.467495	0	0	0	6.33191	0	0	0
ENSG00000115419	GLS	4115.36	6079.27	4834.43	4112.27	3357.86	3715.29	5037.72	4511.1
ENSG00000137845	ADAM10	3672.17	3284.33	3450.88	3780.97	3572.66	2822.56	3976.47	3428.19
ENSG00000173726	TOMM20	2496.89	2473.23	1920.72	2048.97	2480.16	2096.94	1697.32	1671.64
ENSG00000101558	VAPA	1521.7	2081.37	1765.82	1458.97	1747.12	1483.69	1446.85	1380.84
ENSG00000105993	DNAJB6	3468.35	3243.27	3276.06	2204	2966.74	2772.66	3045.19	3229.81
ENSG00000124126	PREX1	7052.16	7491.57	7703.34	7266.7	7631.9	6521.38	8694.87	9163.13
ENSG00000127528	KLF2	439.445	665.081	953.167	294.262	435.441	646.664	1465.79	355.379
ENSG00000132205	EMILIN2	106.121	190.512	186.429	101.214	148.069	130.302	165.256	151.999
ENSG00000167615	LENG8	7237.76	4897.41	5891.6	8470.9	4906.74	6607.6	7248.88	6175.95
ENSG00000022840	RNF10	2723.63	2858.82	2715.67	2728.84	2693.5	3015.34	2568.35	2650.71
ENSG00000130779	CLIP1	4047.1	5275.01	4426.17	4429.24	2840.59	3579.18	4497.2	3259.42
ENSG00000162576	MXRA8	53.2944	17.6822	36.5113	91.3398	62.8321	47.4705	59.3889	84.563
ENSG00000117592	PRDX6	1106.56	1242.89	1584.92	875.381	1164.1	1029.82	1135.27	1260.95
ENSG00000121579	NAA50	3937.24	3104.09	2655.37	2912.01	4173.22	3131.6	3120.93	3414.63
ENSG00000144476	ACKR3	21.0373	13.6895	60.8522	68.6283	70.1381	33.4231	43.0354	32.4693
ENSG00000081320	STK17B	9268.56	10814.7	13734.4	10773.7	14180.6	7593.34	13082.8	13156.1
ENSG00000090060	PAPOLA	4556.67	5417.04	5626.07	4053.02	4616.45	3924.07	4591.88	3928.79
ENSG00000050820	BCAR1	5.14245	3.42237	6.08522	13.8244	21.4311	10.1722	11.1892	31.0421
ENSG00000164828	SUN1	1699.34	1723.16	1596.54	1437.74	1250.8	1426.05	1853.97	1356.22
ENSG00000213585	VDAC1	1123.86	1897.13	1890.29	1056.58	2029.62	1212.92	1375.41	1695.9
ENSG00000109686	SH3D19	40.6721	43.35	24.3409	10.862	48.2199	16.4694	35.289	14.2722
ENSG00000159200	RCAN1	160.351	179.104	151.577	179.717	128.099	156.943	122.221	153.427
ENSG00000101421	CHMP4B	1340.78	1683.24	1378.03	1470.82	1571.78	1448.33	1303.97	1670.21
ENSG00000147454	SLC25A37	587.174	490.54	690.396	597.412	534.316	608.882	557.739	358.947
ENSG00000079805	DNM2	5203.69	5575.04	4979.37	5084.91	5259.38	5973.05	5576.53	6428.57
ENSG00000196683	TOMM7	1367.42	1184.71	1251.34	1438.23	1808.98	1065.66	654.138	1026.17
ENSG00000054118	THRAP3	3734.35	4190.12	3796.07	3748.39	4081.16	3592.74	3603.79	4114.68
ENSG00000136026	CKAP4	59.3719	54.7579	32.0857	15.7993	35.0691	56.6739	47.3389	44.2439
ENSG00000168137	SETD5	3200.94	3303.73	3258.91	2844.37	3024.22	3395.59	3268.11	2670.69
ENSG00000185022	MAFF	64.0468	111.227	155.45	77.5154	120.793	116.739	102.424	97.0512
ENSG00000135218	CD36	4.20746	0	3.87242	0.493729	2.92242	0.968785	5.16425	6.77931
ENSG00000131196	NFATC1	770.899	745.506	817.08	924.754	887.929	854.953	823.698	745.367
ENSG00000147251	DOCK11	3416.45	3477.7	3173.72	2444.94	2853.74	2584.72	3363.65	2960.42
ENSG00000106153	CHCHD2	1494.58	1672.97	1849.35	1243.21	1614.64	1445.91	1365.08	1440.43
ENSG00000197329	PELI1	4140.14	4482.73	3000.02	2412.36	2277.05	2654.47	3503.94	2509.42
ENSG00000115738	ID2	1554.42	2756.15	1583.26	754.417	1438.81	1375.19	1339.26	2130.49
ENSG00000188257	PLA2G2A	0	0.570395	0	0	0	0	0	0
ENSG00000140105	WARS	1673.16	2861.1	1398.5	606.793	587.894	2346.4	1225.65	4006.22
ENSG00000147416	ATP6V1B2	1745.63	1666.69	1650.2	1204.2	1530.37	1534.56	1750.68	1610.98
ENSG00000184254	ALDH1A3	2.33748	0	13.2769	0.493729	0.97414	2.90636	4.30354	0
ENSG00000083312	TNPO1	2848.91	2832.01	2889.93	2045.52	2444.12	2269.86	3274.13	2755.25
ENSG00000164056	SPRY1	28.5172	34.7941	34.2985	15.3056	26.3018	9.68785	43.8961	65.2955
ENSG00000138767	CNOT6L	8334.03	5979.45	4286.76	5163.91	8163.78	6387.2	7267.82	7245.66
ENSG00000167470	MIDN	1302.91	1614.79	1898.59	1496.49	1466.57	1606.73	1678.38	1784.74
ENSG00000180817	PPA1	784.457	1606.23	1114.15	806.753	1507.97	732.886	636.924	869.893
ENSG00000211445	GPX3	76.2017	77.0033	123.917	109.608	117.384	73.1433	85.2101	101.333
ENSG00000134853	PDGFRA	0	0	0	2.46864	0.48707	5.32832	0	0
ENSG00000012171	SEMA3B	37.3996	23.9566	23.2345	4.44356	10.2285	7.75028	20.657	11.061
ENSG00000166272	WBP1L	1184.16	1193.84	1088.15	1353.8	1543.53	1428.96	1152.49	1344.44
ENSG00000103342	GSPT1	3513.69	3169.12	3546.03	2308.18	4343.2	3175.68	3367.95	3570.2
ENSG00000160014	CALM3	4131.72	4345.27	3881.27	5125.89	5420.6	3963.3	4419.74	5276.8
ENSG00000255302	EID1	2865.28	3047.62	2354.43	2801.91	3099.23	2231.6	2407.4	2856.23
ENSG00000109606	DHX15	3881.61	4556.89	3896.2	3108.02	3273.6	3204.74	3968.73	3590.18
ENSG00000143569	UBAP2L	2743.26	3245.55	2787.59	2774.76	2585.86	3115.61	2850.67	2799.86
ENSG00000145860	RNF145	3392.14	5358.29	3729.69	3023.59	3607.73	3476	3499.64	2731.71
ENSG00000172380	GNG12	19.1673	1.14079	18.2557	13.3307	3.40949	4.35953	16.3535	7.13612
ENSG00000206538	VGLL3	1.86998	0	0.553202	0	0.97414	1.45318	0	0.713612
ENSG00000139793	MBNL2	503.96	805.398	500.095	323.886	524.088	313.886	556.878	485.256
ENSG00000101294	HM13	1168.27	1867.47	1368.07	1229.38	1381.82	2005.39	1097.4	1206
ENSG00000012822	CALCOCO1	3932.1	2390.53	3016.61	4615.87	3674.94	3258.51	3541.81	3819.61
ENSG00000067900	ROCK1	4618.85	5821.45	4374.72	3782.46	4036.84	3805.87	4315.59	3801.77
ENSG00000078674	PCM1	4075.15	4114.26	3441.47	2944.6	3797.2	3190.69	3161.38	3144.89
ENSG00000148154	UGCG	1301.51	1083.75	1919.06	1469.34	1676.01	1211.95	1724.86	872.747
ENSG00000073712	FERMT2	24.3097	9.12632	18.8089	21.2303	6.81898	12.5942	24.0998	17.1267
ENSG00000130741	EIF2S3	2575.43	2867.38	2815.25	2835.48	3325.23	2255.82	3132.98	3091.37
ENSG00000090006	LTBP4	1078.51	811.672	1037.81	942.034	1029.18	1195.97	1223.93	964.446
ENSG00000095787	WAC	4649.24	5800.92	4965.54	4130.04	4819.07	5091.45	4374.12	3793.56
ENSG00000183508	TENT5C	11513.5	8630.08	6646.17	3382.53	6505.31	9063.96	4879.35	6645.51
ENSG00000167601	AXL	117.809	20.5342	25.4473	24.1927	210.901	47.4705	21.5177	39.9623
ENSG00000077150	NFKB2	3103.7	6443.18	5986.75	3274.9	4146.92	4218.58	3609.81	4659.17
ENSG00000095564	BTAF1	4746.48	4165.6	3892.33	3311.44	4970.06	3976.86	4780.37	5019.19
ENSG00000060982	BCAT1	822.791	1258.86	233.451	67.1471	1008.24	443.704	383.015	723.959
ENSG00000140545	MFGE8	658.233	359.919	600.224	1021.03	660.954	899.033	825.419	709.33
ENSG00000188554	NBR1	4024.66	3745.21	3752.37	4726.46	4877.52	3525.89	3792.28	3690.8
ENSG00000182149	IST1	4846.05	3789.7	3589.73	4120.17	3689.56	3840.75	3648.54	3389.66
ENSG00000075151	EIF4G3	1390.33	1939.91	2428.56	2056.87	1761.73	1480.79	1850.52	1723.02
ENSG00000089053	ANAPC5	3130.35	2747.59	2640.99	2914.48	2524.48	2900.06	2736.19	2673.55
ENSG00000131238	PPT1	1881.2	1992.96	1541.22	1619.92	2042.77	2150.22	1732.61	2047.71
ENSG00000084754	HADHA	2442.66	2345.46	2522.05	2614.29	2809.91	2011.2	2076.89	2392.03
ENSG00000198053	SIRPA	31.3222	11.4079	40.3838	29.6237	39.9398	294.511	67.1352	47.4552
ENSG00000136527	TRA2B	6127.92	8243.92	5735.6	4152.26	4485.43	7384.08	4299.24	4183.55
ENSG00000131473	ACLY	2463.23	3100.67	2400.9	2185.24	2607.77	2486.87	2606.22	2937.23
ENSG00000112414	ADGRG6	3.73996	0	9.95764	0	1.94828	0	17.2142	3.21125
ENSG00000039560	RAI14	31.3222	0	37.6178	18.268	54.0648	14.0474	61.1103	11.4178
ENSG00000213949	ITGA1	88.3566	251.544	75.2355	243.408	92.5433	165.178	249.605	315.773
ENSG00000139218	SCAF11	5449.12	4544.34	4422.85	4637.1	4915.51	4595.43	5263.23	5441.29
ENSG00000106333	PCOLCE	22.4398	6.84474	44.8094	22.2178	73.5476	46.5017	49.9211	47.0984
ENSG00000177731	FLII	3790.92	3905.5	4037.82	3715.8	3843.47	4074.23	3988.52	4316.99
ENSG00000204256	BRD2	5649.68	5774.68	4254.68	4286.55	4539.01	5543.39	3274.99	3113.13
ENSG00000175390	EIF3F	2816.66	2602.14	2085.57	2795.49	3104.1	2162.33	1866.88	2165.45
ENSG00000162745	OLFML2B	7.01243	0	0	4.93729	2.43535	32.9387	7.74637	2.14084
ENSG00000110719	TCIRG1	2723.63	4038.4	3435.94	4469.73	3265.32	5567.12	3393.77	4348.75
ENSG00000143119	CD53	6708.55	5974.32	9716.44	6314.3	7517.93	5680.96	6539.66	6500.29
ENSG00000136758	YME1L1	3052.28	3905.5	3217.42	2614.79	3153.29	2859.37	2897.14	3046.41
ENSG00000117298	ECE1	3099.96	4606.51	3932.16	2255.35	3150.37	4105.71	3020.22	2992.89
ENSG00000144136	SLC20A1	1488.97	1768.8	1514.11	1089.17	1278.56	1299.14	1712.81	1605.63
ENSG00000169508	GPR183	2322.52	2458.4	3929.95	1632.76	2014.04	1619.32	2224.93	1161.05
ENSG00000077097	TOP2B	5070.45	4675.53	4894.73	4330.49	5653.42	3581.11	4296.66	4573.89
ENSG00000131018	SYNE1	4377.62	3073.86	2654.26	3013.72	3246.32	3871.75	3000.43	3591.96
ENSG00000048740	CELF2	4951.71	5114.73	4950.61	5379.67	4495.17	3872.72	5112.61	4866.47
ENSG00000112335	SNX3	1001.37	920.618	1160.62	1055.59	1145.59	1019.65	1010.47	908.784
ENSG00000131711	MAP1B	28.9847	26.8086	18.8089	12.3432	35.0691	6.7815	29.2641	52.4505
ENSG00000034677	RNF19A	4030.74	5215.69	3383.38	2682.92	3785.51	3328.75	4112.46	3551.65
ENSG00000105509	HAS1	4.20746	0	0	2.46864	0	0.484393	0	0.713612
ENSG00000065150	IPO5	1531.05	2216.56	1898.04	1375.53	1488	1150.43	1470.95	1457.55
ENSG00000121039	RDH10	957.43	3307.72	626.778	484.348	1009.7	2158.94	1702.48	2634.3
ENSG00000111912	NCOA7	834.011	1290.8	609.629	404.857	588.868	690.26	758.284	596.936
ENSG00000164096	C4orf3	1495.05	1676.39	1842.72	1600.67	2441.68	1772.88	1341.84	1394.04
ENSG00000119314	PTBP3	5533.74	5700.53	5723.98	4589.7	5618.35	4530.52	5525.75	4701.27
ENSG00000025796	SEC63	1464.19	1425.99	1582.16	1506.37	1500.18	1235.2	1359.92	1294.13
ENSG00000204103	MAFB	8.88241	0	14.3833	9.87457	10.7155	41.1734	22.3784	6.0657
ENSG00000139318	DUSP6	93.0315	100.96	126.13	240.446	143.686	99.3005	129.106	80.9949
ENSG00000163162	RNF149	2744.2	2107.61	2123.19	1885.55	2120.7	3192.15	2634.63	2318.88
ENSG00000164741	DLC1	15.4273	1.71119	3.87242	1.97491	2.43535	11.141	8.60708	0.356806
ENSG00000164091	WDR82	4662.8	6415.23	5650.41	4352.71	5280.81	4217.12	4952.51	4651.68
ENSG00000144746	ARL6IP5	4172.39	5543.67	6386.17	4757.08	6878.41	4075.68	4939.6	4786.55
ENSG00000103657	HERC1	4365.94	3574.67	3221.3	5062.69	4637.4	4768.36	5130.68	4909.29
ENSG00000232216	IGHV3-43	66.3843	0	0	0	1.46121	0	0	0
ENSG00000079257	LXN	157.078	122.635	142.173	121.951	151.479	144.349	162.674	169.483
ENSG00000129128	SPCS3	3296.77	3591.21	3122.83	3269.47	3089.97	3273.04	3442.83	3701.86
ENSG00000127954	STEAP4	3.73996	2.85198	87.9592	2.96237	1.46121	0.484393	19.7963	2.14084
ENSG00000179776	CDH5	0.93499	0	0.553202	1.97491	1.46121	0	0	0
ENSG00000100342	APOL1	656.831	1212.66	1031.72	1361.21	907.412	1877.02	970.018	1136.43
ENSG00000105220	GPI	3093.88	2797.22	6442.59	2322.99	7581.25	1930.3	2400.52	2848.02
ENSG00000133789	SWAP70	347.816	268.086	360.135	417.201	411.574	426.75	347.726	279.379
ENSG00000211664	IGLV2-18	0	0	0	0	0	0	0	0
ENSG00000109099	PMP22	10.7524	1.71119	14.9365	10.3683	8.28019	115.285	27.5427	13.5586
ENSG00000048828	FAM120A	3498.73	4162.74	4662.94	3254.17	3420.21	3207.65	3653.71	3575.91
ENSG00000135390	ATP5MC2	1560.97	1654.72	1509.14	1831.24	2204.48	1666.31	1264.38	1486.81
ENSG00000178719	GRINA	879.358	1050.67	1078.74	956.352	958.067	1483.21	979.486	1040.45
ENSG00000141480	ARRB2	1267.85	1514.97	1660.71	1386.88	1633.15	1481.76	1421.03	1826.85
ENSG00000109920	FNBP4	4699.26	4556.89	4596	4729.43	3817.17	4459.32	4512.69	3693.65
ENSG00000106263	EIF3B	2407.13	3212.47	2561.88	2286.46	2220.07	2337.19	2156.93	2330.3
ENSG00000180447	GAS1	0.93499	1.71119	0	0	2.92242	0.484393	0.860708	1.42722
ENSG00000155254	MARVELD1	20.1023	18.823	7.74483	9.38084	24.8406	31.4855	26.682	15.6995
ENSG00000154380	ENAH	107.991	7.98553	16.5961	7.89966	28.7371	3.87514	36.1497	19.2675
ENSG00000148396	SEC16A	3759.59	3804.54	3081.89	3161.84	2872.25	3067.66	3527.18	3681.52
ENSG00000149187	CELF1	4672.61	4139.93	4035.61	4099.43	3821.55	4534.4	4435.23	4590.66
ENSG00000168685	IL7R	3683.86	2627.24	3091.29	5511.99	4762.57	3535.58	2717.26	3189.13
ENSG00000137509	PRCP	431.498	672.496	429.285	458.18	582.536	412.218	426.051	424.599
ENSG00000018280	SLC11A1	39.7371	10.2671	68.5971	18.268	56.5001	268.354	99.8421	48.1688
ENSG00000174059	CD34	0	0	0	3.94983	0	0.968785	0	0.356806
ENSG00000145147	SLIT2	2.80497	2.85198	0.553202	0.987457	0	1.45318	0	0.713612
ENSG00000107854	TNKS2	3304.72	3088.69	2453.45	3047.79	2777.27	2727.13	3116.62	2570.43
ENSG00000143387	CTSK	366.516	234.432	260.005	93.3147	202.134	199.57	192.799	154.14
ENSG00000083799	CYLD	13044	16366.3	10598.2	8516.82	9993.71	10117	12397.6	9079.28
ENSG00000182095	TNRC18	2369.26	2355.16	2406.98	1950.23	2320.89	2210.77	2469.37	2753.83
ENSG00000125144	MT1G	5.14245	0	4.42562	0	6.33191	320.184	7.74637	0.713612
ENSG00000125991	ERGIC3	1800.32	1765.94	1376.37	1785.82	1747.12	1544.24	1381.44	1576.37
ENSG00000092148	HECTD1	3815.23	3809.67	3223.51	2888.81	2837.67	3037.63	3199.25	2889.06
ENSG00000110713	NUP98	4181.74	3959.68	3218.53	2281.52	3839.09	3146.61	3243.15	4360.17
ENSG00000103994	ZNF106	2522.6	2508.6	2229.96	2195.61	2825.98	2367.23	2490.89	2447.33
ENSG00000077232	DNAJC10	1863.44	2440.72	1853.78	2046.51	1948.28	1923.52	1783.39	1589.93
ENSG00000107223	EDF1	1765.26	2147.54	2025.83	2159.08	2250.26	1736.55	1680.1	2108.72
ENSG00000186635	ARAP1	2196.29	2239.94	2448.47	3070.99	3095.33	3066.69	2592.45	2846.6
ENSG00000166794	PPIB	524.529	731.817	664.949	599.88	633.191	617.116	638.645	782.118
ENSG00000164574	GALNT10	2862	2880.5	3024.91	2020.34	3080.72	2268.9	3323.19	2853.02
ENSG00000121774	KHDRBS1	2504.84	3104.66	2827.42	2604.91	2750	2705.33	2576.1	2477.66
ENSG00000167548	KMT2D	6786.16	6175.1	5939.18	5241.42	5094.27	6286.93	6523.31	6116.72
ENSG00000211668	IGLV2-11	185.596	0	0	1.97491	0	0	1.72142	79.5677
ENSG00000128641	MYO1B	32.7247	58.7507	42.0434	36.0422	47.2458	18.8913	67.1352	41.3895
ENSG00000003989	SLC7A2	1.86998	0	4.97882	15.3056	0	0.484393	1.72142	0
ENSG00000110696	C11orf58	2951.3	3659.65	2919.25	3189.49	2840.59	2929.61	2992.68	2902.97
ENSG00000134851	TMEM165	1018.2	1024.43	1078.19	893.155	902.054	1028.37	1217.9	1128.93
ENSG00000064666	CNN2	1990.13	1932.5	2535.33	1943.81	2423.17	1639.67	2142.3	1897.85
ENSG00000164754	RAD21	6084.92	6890.37	6121.18	4650.92	5414.27	4711.2	6022.37	5382.42
ENSG00000065809	FAM107B	5796.47	6655.37	4392.98	4215.46	5226.75	4763.03	4891.4	5196.16
ENSG00000129003	VPS13C	8005.38	7231.47	7430.61	10151.1	6300.25	7486.77	9408.4	7600.68
ENSG00000083444	PLOD1	86.0191	184.238	260.558	91.8335	172.423	146.771	149.763	163.774
ENSG00000055609	KMT2C	3160.27	3192.5	2902.65	2637.99	2835.72	2690.32	3136.42	2869.08
ENSG00000225733	FGD5-AS1	2975.61	2690.55	2324.56	3086.79	2545.43	3018.74	2518.43	2479.8
ENSG00000163659	TIPARP	4254.2	3226.15	903.379	1144.46	998.494	1643.06	840.912	1664.5
ENSG00000186174	BCL9L	1234.19	1388.34	1971.06	1732.99	2204.97	2039.29	1926.26	1663.07
ENSG00000117984	CTSD	415.136	470.576	486.265	665.052	591.79	756.621	493.186	546.27
ENSG00000173193	PARP14	12451.3	12334.8	6027.14	6079.77	6188.71	13626.5	7653.42	6942.01
ENSG00000116871	MAP7D1	2324.85	2560.5	2465.62	3043.84	2682.78	2869.06	2514.99	2757.75
ENSG00000070961	ATP2B1	1242.6	1736.28	1020.1	1248.64	1015.54	1060.34	1111.17	901.648
ENSG00000084623	EIF3I	1438.95	2021.48	1644.12	1362.69	1470.46	1275.89	1259.22	1452.91
ENSG00000002549	LAP3	2703.99	3887.24	1513.01	983.507	883.058	3867.88	1330.65	1850.4
ENSG00000106565	TMEM176B	12.1549	0	13.2769	20.7366	15.0992	199.57	51.6425	18.5539
ENSG00000135018	UBQLN1	2863.41	2950.65	3621.81	2708.6	2881.51	2945.11	3329.22	2517.62
ENSG00000138166	DUSP5	168.766	664.51	283.24	192.06	538.213	636.008	256.491	544.843
ENSG00000150593	PDCD4	6113.43	4041.82	3710.88	2707.11	5233.08	4239.89	4291.49	4964.24
ENSG00000134910	STT3A	1053.27	1269.13	1418.96	1301.47	1391.56	1246.83	1155.07	1268.09
ENSG00000136813	ECPAS	2609.09	3252.39	2590.09	2123.53	2102.68	2706.3	2434.94	2637.15
ENSG00000005884	ITGA3	584.836	694.171	769.504	598.399	675.566	604.038	864.151	524.861
ENSG00000171456	ASXL1	6462.65	6410.67	5142.57	5070.1	5159.53	5419.39	5318.32	5541.91
ENSG00000130164	LDLR	808.299	1818.42	476.86	133.8	406.217	617.601	557.739	752.147
ENSG00000142669	SH3BGRL3	2207.51	2917	2499.92	2645.89	2504.03	2008.78	2289.48	2480.51
ENSG00000198898	CAPZA2	1315.06	1742.56	1483.69	1141.5	1374.51	1258.94	1451.15	1490.38
ENSG00000198517	MAFK	836.349	825.362	684.311	755.899	742.782	733.855	901.161	901.292
ENSG00000158869	FCER1G	18.6998	1.71119	39.2774	19.2554	28.7371	264.963	57.6674	33.8966
ENSG00000165757	JCAD	2.33748	2.28158	2.21281	6.41847	1.46121	2.42196	18.0749	1.42722
ENSG00000244575	IGKV1-27	0.467495	0	0	5.43102	0	0	0	32.8261
ENSG00000071553	ATP6AP1	1499.26	1400.32	1238.07	1568.58	1430.53	1616.42	1295.37	1573.16
ENSG00000167522	ANKRD11	5712.32	4674.96	4402.38	5702.07	5018.28	5819.98	5456.89	5980.42
ENSG00000143570	SLC39A1	691.893	1101.43	1013.47	682.333	1049.64	1108.77	843.494	947.676
ENSG00000129083	COPB1	1992	2494.91	2322.9	1766.56	2324.3	1827.13	2069.14	2103.01
ENSG00000156261	CCT8	2152.81	2712.23	2472.26	1888.51	2395.9	1977.29	1998.56	2057.7
ENSG00000089220	PEBP1	1590.42	1672.97	1395.18	1628.32	1492.87	1558.29	1297.09	1250.96
ENSG00000130396	AFDN	1647.92	1959.88	1349.26	405.845	566.463	668.946	1115.48	303.642
ENSG00000105329	TGFB1	2381.42	1850.93	2188.47	2276.58	2260.01	2321.21	2267.11	2650.71
ENSG00000143870	PDIA6	927.51	1931.36	1571.65	1197.29	1246.9	1427.02	1394.35	1575.65
ENSG00000136205	TNS3	231.41	137.465	297.623	346.104	260.583	581.271	463.922	981.93
ENSG00000130844	ZNF331	889.176	392.432	984.147	601.361	1126.11	509.581	846.937	792.823
ENSG00000116044	NFE2L2	1700.28	1848.65	2030.25	1114.35	1275.15	1004.15	1377.99	1030.81
ENSG00000197451	HNRNPAB	781.652	1220.08	1186.07	1148.41	875.752	969.27	1044.04	1139.99
ENSG00000153944	MSI2	5937.19	5635.5	5155.84	4089.55	4897.49	3683.32	5911.34	6005.04
ENSG00000142599	RERE	2497.83	2956.93	2439.62	2333.86	2243.45	2637.52	2317.89	2329.23
ENSG00000049860	HEXB	607.276	712.423	780.568	761.33	767.136	960.551	818.533	695.415
ENSG00000071282	LMCD1	388.956	434.071	451.413	429.544	519.217	391.874	430.354	471.697
ENSG00000166197	NOLC1	1396.88	2173.21	1791.82	1591.78	1182.61	1645.97	1357.34	1247.04
ENSG00000152492	CCDC50	1389.86	1521.81	1533.48	1265.92	990.701	1586.39	940.754	980.859
ENSG00000197702	PARVA	5.60994	5.70395	8.29803	2.96237	4.38363	4.35953	8.60708	0.356806
ENSG00000101150	TPD52L2	1088.8	1082.61	1121.34	1128.66	1084.71	1276.86	1242	1060.78
ENSG00000107290	SETX	5609.94	6489.96	5771.01	4849.4	5314.91	6603.24	5307.99	5048.8
ENSG00000170145	SIK2	778.379	549.861	784.994	684.802	792.95	736.761	794.434	821.724
ENSG00000092010	PSME1	3211.22	4670.97	3561.52	2995.95	3534.18	3384.45	2844.64	2978.62
ENSG00000114423	CBLB	2474.92	3339.66	1623.1	5096.76	2224.45	2515.94	2533.06	3438.89
ENSG00000177189	RPS6KA3	4322.93	5007.5	3495.13	3871.82	4822.48	3938.6	3868.88	3616.58
ENSG00000165458	INPPL1	1884.94	2100.77	1980.46	1904.31	1868.89	2281.49	2008.89	2042.36
ENSG00000115963	RND3	40.2046	1.14079	37.0645	12.8369	37.0173	27.126	18.0749	14.629
ENSG00000118058	KMT2A	6879.19	6950.83	5975.69	6238.76	6719.62	7244.09	7353.89	8081.65
ENSG00000122565	CBX3	3437.96	3367.04	3222.96	3567.68	3979.85	3367.5	3355.9	3267.98
ENSG00000101474	APMAP	1312.73	1258.86	1186.62	1616.47	1407.15	1332.08	1341.84	1460.76
ENSG00000100030	MAPK1	2157.49	2477.23	2432.98	2071.69	2183.05	1984.56	2100.99	2162.6
ENSG00000156804	FBXO32	840.089	610.323	283.24	776.635	871.856	840.906	593.889	690.419
ENSG00000196730	DAPK1	25.2447	4.56316	21.0217	10.3683	18.9957	98.3317	55.0853	16.0563
ENSG00000078304	PPP2R5C	8702.89	6414.09	4999.29	5617.15	7154.09	6103.83	5435.37	7197.84
ENSG00000169429	CXCL8	434.77	63.3139	390.008	595.437	261.557	4570.73	473.389	1063.28
ENSG00000106609	TMEM248	2039.68	2027.75	2177.4	2695.26	2254.16	2061.58	2221.49	2232.53
ENSG00000102316	MAGED2	1797.52	1392.33	1930.68	1303.44	2119.73	2476.22	2067.42	2062.34
ENSG00000164694	FNDC1	0	0	0	0.493729	0	0	0	0
ENSG00000173020	GRK2	5945.13	6748.91	6594.72	6187.41	7584.17	6600.33	6758.28	7972.83
ENSG00000114978	MOB1A	4824.55	5884.77	4541.24	3875.28	4447.92	4748.5	4639.22	4710.91
ENSG00000110917	MLEC	1275.33	1533.79	1290.07	1643.62	1561.06	1347.58	1454.6	1606.7
ENSG00000123908	AGO2	2715.68	3738.37	3263.34	2299.79	2893.68	2155.06	2990.96	3289.75
ENSG00000023445	BIRC3	14638.7	22322.4	23979.7	18401.8	18335.8	19417.4	15137.3	18212.1
ENSG00000213923	CSNK1E	890.111	1094.02	1037.25	1542.41	1190.89	1043.38	1169.7	1088.61
ENSG00000135829	DHX9	4322.93	6020.52	5034.14	3924.16	4023.69	3679.45	4203.7	3802.84
ENSG00000148358	GPR107	1650.72	1534.36	1720.46	1488.59	1638.99	1723.95	1679.24	1602.06
ENSG00000100129	EIF3L	1974.23	1688.37	1756.97	2477.53	2492.83	971.692	1420.17	1706.96
ENSG00000061273	HDAC7	3154.66	4002.46	3794.97	4684	4044.14	3392.69	3752.69	3484.57
ENSG00000138834	MAPK8IP3	3854.03	3470.85	3574.79	4139.91	3371.01	3955.07	3783.67	3978.03
ENSG00000266714	MYO15B	383.346	334.252	1988.76	1949.24	269.837	1617.87	473.389	280.449
ENSG00000166326	TRIM44	1988.72	2362.01	1425.6	1465.88	1630.71	2001.51	1890.98	1387.97
ENSG00000157637	SLC38A10	1530.11	2146.4	1760.29	2102.3	1959	2508.19	1891.84	2086.24
ENSG00000170989	S1PR1	623.638	578.381	898.4	88.3774	410.6	499.893	686.845	544.129
ENSG00000185630	PBX1	14.9598	10.2671	0.553202	7.89966	2.92242	2.90636	1.72142	1.07042
ENSG00000101367	MAPRE1	2076.15	2818.89	2044.08	1648.56	1855.25	1977.29	1952.95	1922.47
ENSG00000177311	ZBTB38	4942.82	4905.97	4892.52	7016.87	5496.1	4502.43	5106.58	4515.73
ENSG00000010810	FYN	15153.9	11496.3	11464.6	13560.3	18377.2	12668.3	10943.9	15560.7
ENSG00000004534	RBM6	3494.53	4062.92	4362	4076.22	3395.37	3995.27	3081.34	4411.9
ENSG00000141551	CSNK1D	2811.52	3244.98	3064.74	3012.24	2839.13	3024.55	3268.97	3270.84
ENSG00000135720	DYNC1LI2	2357.58	2215.41	1573.31	1779.89	1287.81	1788.38	1800.6	1665.21
ENSG00000081041	CXCL2	9.8174	2.28158	39.8306	7.40593	12.1768	144.349	43.0354	94.9104
ENSG00000105701	FKBP8	2761.96	2701.96	2915.93	3928.6	4349.54	2733.91	2750.82	3048.19
ENSG00000184205	TSPYL2	7718.34	4195.26	4562.26	4160.16	4270.63	3415.94	4177.88	3716.85
ENSG00000281990	IGHV1-69-2	0	0	2.76601	0	0	0	0	0
ENSG00000153815	CMIP	1577.33	1241.75	1253.56	1275.79	1821.64	1160.6	1404.68	1837.91
ENSG00000065613	SLK	2072.41	2322.08	2099.96	1700.9	2158.7	1501.62	1812.65	1419.02
ENSG00000107968	MAP3K8	596.991	786.575	482.946	249.827	578.152	488.752	391.622	596.223
ENSG00000138688	KIAA1109	6452.37	4756.52	4583.28	4486.51	5419.14	4598.82	5706.5	4883.6
ENSG00000165672	PRDX3	1066.36	1153.91	1315.51	1044.73	1240.08	870.454	1174.87	1413.66
ENSG00000153234	NR4A2	395.501	301.739	979.721	159.474	333.156	351.185	438.1	249.764
ENSG00000168487	BMP1	96.7715	142.028	94.0444	99.2395	127.125	96.8785	95.5386	131.305
ENSG00000167110	GOLGA2	1165.93	972.524	1025.64	1174.58	1075.94	1308.83	1168.84	1149.63
ENSG00000104331	IMPAD1	1165.47	1384.92	1291.73	994.863	1319.96	999.302	1282.46	1125.37
ENSG00000111530	CAND1	2772.25	3165.12	2787.59	2036.63	2488.93	2235.96	2797.3	2615.74
ENSG00000137962	ARHGAP29	7.94742	0	19.9153	5.92474	1.94828	0	19.7963	6.42251
ENSG00000090924	PLEKHG2	3892.83	4126.24	4038.93	2486.91	3208.33	3296.78	5515.42	4421.89
ENSG00000106538	RARRES2	31.3222	3.42237	18.8089	18.268	23.8664	11.141	18.9356	18.5539
ENSG00000125089	SH3TC1	2404.79	1260	2139.23	1479.21	2027.67	3965.24	2082.05	2457.68
ENSG00000265190	ANXA8	0	0	1.65961	1.48119	2.92242	1.93757	9.46779	0.356806
ENSG00000174780	SRP72	1939.17	2105.33	1823.35	1695.96	1907.85	1629.98	1748.96	1664.5
ENSG00000143420	ENSA	1979.84	2516.01	2124.85	1873.21	2158.21	1821.8	1914.21	2001.68
ENSG00000102531	FNDC3A	1951.79	2136.7	1660.71	1484.64	1326.78	1842.15	1878.93	1421.51
ENSG00000117143	UAP1	165.493	233.292	200.812	141.206	210.414	189.398	233.252	225.501
ENSG00000125827	TMX4	1973.76	1225.21	1531.26	2636.51	1875.22	1538.92	1933.15	1881.08
ENSG00000065308	TRAM2	274.887	311.436	230.132	206.379	281.039	433.531	276.287	214.44
ENSG00000025708	TYMP	2231.35	3652.81	3327.51	1218.52	2536.66	3791.83	2301.53	3240.51
ENSG00000102096	PIM2	10321.8	12768.3	10571.1	10763.3	8670.82	10882.4	10594.5	10192.9
ENSG00000007237	GAS7	14.4923	2.85198	3.31921	15.3056	10.2285	5.81271	6.02496	23.1924
ENSG00000170476	MZB1	142.586	177.393	196.94	260.195	363.841	242.196	266.82	305.069
ENSG00000008441	NFIX	33.6596	37.0757	9.40444	9.38084	6.33191	21.3133	15.4927	5.70889
ENSG00000107863	ARHGAP21	414.201	896.661	317.538	256.245	488.531	378.311	728.159	859.188
ENSG00000131981	LGALS3	1052.8	811.102	2567.96	856.125	1038.92	1030.79	1059.53	1358.72
ENSG00000073756	PTGS2	35.9971	7.41514	18.2557	287.35	12.6638	60.0647	16.3535	32.8261
ENSG00000188229	TUBB4B	1095.34	1367.81	1144.02	627.035	856.756	1457.54	793.573	853.48
ENSG00000183726	TMEM50A	2495.02	3035.64	2447.92	2235.11	2332.58	2939.29	2206.86	2332.08
ENSG00000119801	YPEL5	3528.65	3842.18	3114.53	1782.85	2755.84	3554.47	2534.79	1833.27
ENSG00000108829	LRRC59	626.443	924.61	631.204	633.454	517.756	793.92	645.531	549.124
ENSG00000247556	OIP5-AS1	5800.21	5487.2	6879.07	5531.74	5766.42	4751.41	6655	5217.57
ENSG00000205726	ITSN1	30.8547	22.8158	17.7025	8.88712	18.0216	27.126	26.682	19.6243
ENSG00000213625	LEPROT	1796.12	1455.65	1423.94	1479.7	1300.96	1442.04	1310.86	1261.31
ENSG00000186468	RPS23	995.297	888.676	951.508	1138.04	1076.91	707.213	998.421	919.132
ENSG00000107819	SFXN3	876.553	932.596	1307.22	1334.05	1224.98	1558.29	1568.21	1402.25
ENSG00000167123	CERCAM	3.27247	7.41514	4.42562	5.43102	13.638	10.6566	17.2142	11.061
ENSG00000117114	ADGRL2	7.01243	1.71119	0	7.89966	3.89656	4.35953	0	1.42722
ENSG00000078618	NRDC	3940.05	5015.48	3660.54	2917.94	3449.43	4484.99	3701.05	3594.11
ENSG00000103769	RAB11A	1420.72	1667.84	1248.58	1187.91	1404.22	1288	1319.47	1260.6
ENSG00000197629	MPEG1	48.6195	0	20.4685	31.5986	27.763	0.968785	36.1497	33.8966
ENSG00000165678	GHITM	1970.49	1989.54	1937.31	1846.05	2251.73	1680.36	1769.62	2043.07
ENSG00000182022	CHST15	32.7247	0	12.7237	5.92474	37.5044	78.4716	30.1248	90.6287
ENSG00000124795	DEK	3689	3782.29	3194.19	2700.7	3706.6	3290	3695.88	3577.34
ENSG00000158417	EIF5B	1553.02	2704.81	2038.55	1567.59	1768.06	1652.75	1652.56	1529.98
ENSG00000243264	IGKV2D-29	71.5267	14.2599	0	0	0	0	0	0
ENSG00000120438	TCP1	2537.56	2677.43	2394.26	1922.58	1879.6	2007.81	1934.01	1881.08
ENSG00000007168	PAFAH1B1	3190.65	3411.53	3034.31	2816.23	2811.37	2992.09	2860.99	2833.75
ENSG00000131507	NDFIP1	2510.45	2723.07	3106.23	2647.87	2803.09	2146.34	2595.9	2378.11
ENSG00000082898	XPO1	4349.11	3961.39	4375.28	4172.5	4881.42	4633.22	3720.84	3706.86
ENSG00000204217	BMPR2	1508.14	1630.19	1451.05	989.432	1064.74	1350	1588.87	1512.5
ENSG00000065000	AP3D1	2634.33	3093.25	2597.28	2587.63	2411.97	2740.21	2712.95	2856.23
ENSG00000179134	SAMD4B	1322.08	1216.08	1243.05	1155.82	1080.32	1326.75	1380.58	1277.01
ENSG00000171621	SPSB1	575.019	817.376	613.501	384.615	583.51	544.457	718.691	522.721
ENSG00000103365	GGA2	3288.83	2407.07	3976.42	2866.59	3369.55	2826.43	3191.51	3390.73
ENSG00000240342	RPS2P5	1674.1	2451.56	920.528	2087.98	2388.59	1170.29	1309.14	839.921
ENSG00000143621	ILF2	2225.74	2836.57	2030.81	1711.26	1664.81	2040.26	1588.01	1870.02
ENSG00000156030	ELMSAN1	1834.92	2459.54	2196.77	1679.17	1524.04	1618.84	1687.85	1610.26
ENSG00000180530	NRIP1	642.338	1092.31	1750.33	1858.39	616.631	728.042	635.203	347.529
ENSG00000149311	ATM	7299	4645.87	5055.71	8479.79	5647.58	5532.25	6361.49	5883.73
ENSG00000010244	ZNF207	5115.33	5305.82	3453.64	4081.16	3157.19	4114.43	4173.57	4158.57
ENSG00000112977	DAP	714.8	1074.62	777.802	751.455	661.928	695.103	559.46	727.884
ENSG00000105438	KDELR1	591.849	562.41	746.823	638.391	866.985	710.12	603.356	657.236
ENSG00000132507	EIF5A	1336.57	2182.33	1969.95	1353.8	1244.46	1759.31	1456.32	1490.38
ENSG00000105568	PPP2R1A	1582.94	1732.86	1701.1	1652.02	1732.51	1466.26	1677.52	1868.24
ENSG00000088247	KHSRP	2554.86	2712.8	2357.19	2488.39	2444.61	2680.63	2254.19	2440.55
ENSG00000175220	ARHGAP1	1215.49	1109.99	1220.36	1722.62	1183.58	1343.71	1427.91	1648.44
ENSG00000137831	UACA	5.14245	8.55593	1.65961	3.4561	7.30605	3.87514	3.44283	1.42722
ENSG00000170876	TMEM43	1400.62	1420.85	1295.05	1227.9	1187.48	1479.34	1226.51	1383.69
ENSG00000158270	COLEC12	2.80497	0	4.97882	0	2.43535	2.42196	10.3285	2.14084
ENSG00000211955	IGHV3-33	244.5	17.1119	1.65961	13.8244	23.3794	3.87514	0.860708	34.2534
ENSG00000188529	SRSF10	5120.01	6344.5	3994.12	3621.5	3143.55	4475.3	3831.01	3690.8
ENSG00000148730	EIF4EBP2	2544.58	2573.62	2699.63	3209.24	3086.08	2602.64	2876.49	3147.38
ENSG00000177565	TBL1XR1	4351.91	4074.33	3241.21	3610.14	3895.1	3078.32	4190.79	4028.34
ENSG00000172354	GNB2	1271.12	1501.28	1527.94	1413.55	1443.68	1665.83	1559.6	1642.73
ENSG00000096746	HNRNPH3	5985.81	5840.28	4851.58	5174.77	4050.96	5699.85	4723.57	3964.47
ENSG00000137693	YAP1	34.1271	0.570395	11.6172	10.3683	11.6897	8.23468	32.7069	4.99528
ENSG00000140740	UQCRC2	1770.4	1905.12	2032.46	1683.12	2226.88	1613.51	1711.09	1837.91
ENSG00000162645	GBP2	9870.69	12453.4	8823.02	10327.8	9514.43	8498.67	8449.57	8542.65
ENSG00000132466	ANKRD17	3005.53	3413.81	2865.03	2741.18	2601.44	2801.73	2620.86	2614.67
ENSG00000136859	ANGPTL2	12.6224	0	0.553202	16.7868	2.43535	10.6566	1.72142	0.713612
ENSG00000093072	ADA2	562.864	398.706	345.198	867.975	234.281	954.738	710.084	511.66
ENSG00000196405	EVL	8665.02	7228.05	8013.13	16438.7	8188.62	11055.3	8841.19	8193.33
ENSG00000170542	SERPINB9	2808.71	2256.48	2813.59	3943.41	2951.16	2965.94	2962.56	3277.62
ENSG00000203879	GDI1	3430.95	3211.89	3833.69	3905.39	3028.6	3359.75	3304.26	3179.14
ENSG00000021355	SERPINB1	1481.96	1940.48	1904.12	1520.68	1581.03	1467.71	1691.29	1468.97
ENSG00000148672	GLUD1	1855.02	3219.88	1836.63	1469.34	1833.33	1304.47	1925.4	1822.92
ENSG00000181104	F2R	655.428	836.77	356.262	205.885	524.088	943.113	875.34	1377.63
ENSG00000050165	DKK3	59.3719	0	23.2345	90.3523	91.0821	22.2821	52.5032	31.7557
ENSG00000126432	PRDX5	736.305	850.459	927.72	831.933	1064.25	698.979	834.026	1177.1
ENSG00000070404	FSTL3	16.3623	10.8375	37.6178	15.7993	39.9398	25.6728	37.0105	34.967
ENSG00000270647	TAF15	3219.17	3627.14	3376.19	3218.62	3438.72	2958.67	2955.67	3160.59
ENSG00000189060	H1F0	158.948	110.657	78.0015	105.658	262.531	502.315	222.063	150.572
ENSG00000122870	BICC1	3.27247	5.70395	0.553202	0.493729	0	6.2971	2.58212	0
ENSG00000141429	GALNT1	931.718	1313.05	1049.98	760.342	947.351	1129.6	1199.83	1101.46
ENSG00000163468	CCT3	1577.8	2524	2541.41	1445.64	1760.76	1779.66	1755.84	1846.11
ENSG00000184216	IRAK1	999.972	1511.55	1260.19	1201.74	1029.18	1334.99	1249.75	1382.27
ENSG00000146731	CCT6A	1911.59	2610.7	2466.18	1708.3	1850.38	1520.02	1877.2	1984.91
ENSG00000127914	AKAP9	3576.34	3424.65	2627.71	2636.51	2299.95	2605.55	3204.42	2748.83
ENSG00000028528	SNX1	2760.09	2230.24	2790.91	3045.32	2696.91	2875.84	2939.32	2854.8
ENSG00000139289	PHLDA1	2481.46	1826.41	2437.96	1434.28	1771.96	1064.21	1777.36	2039.15
ENSG00000187555	USP7	4139.67	4874.03	4301.15	4098.94	4269.17	3836.87	3742.36	3768.94
ENSG00000116604	MEF2D	4036.35	4371.51	4843.29	3923.66	4778.65	3928.42	3768.18	3857.78
ENSG00000211625	IGKV3D-20	0.93499	0	0	0	1.46121	0	0	53.1641
ENSG00000155926	SLA	5030.25	4409.72	4498.64	6560.17	5720.64	3952.16	5172.86	5296.07
ENSG00000107798	LIPA	1010.72	1070.63	1027.85	889.205	1064.74	1175.62	793.573	865.968
ENSG00000163931	TKT	887.773	1171.02	1213.17	883.774	1332.62	1055.01	1124.95	1161.05
ENSG00000136960	ENPP2	37.3996	30.2309	1.1064	3.4561	14.125	30.5167	18.0749	12.1314
ENSG00000137077	CCL21	0	0	0	0	0	0	0	0
ENSG00000115760	BIRC6	5418.73	5811.19	5179.63	5100.71	5266.2	5391.29	5826.99	5873.02
ENSG00000162512	SDC3	13.0899	3.99277	26.0005	15.7993	24.8406	11.141	37.0105	20.3379
ENSG00000125347	IRF1	2992.44	8585.02	3248.4	2717.48	2577.09	3235.26	3244.01	3188.77
ENSG00000135916	ITM2C	221.125	279.494	534.393	177.742	362.867	340.528	703.199	493.106
ENSG00000118762	PKD2	1928.42	1745.41	1555.6	558.407	590.816	681.056	1271.27	821.01
ENSG00000197256	KANK2	15.8948	7.98553	13.2769	18.7617	25.3276	19.3757	43.0354	26.7604
ENSG00000134109	EDEM1	4305.63	4321.88	3864.67	4135.96	4586.25	4137.2	4884.52	4183.19
ENSG00000124422	USP22	1771.81	1615.93	1561.69	1752.74	1994.55	1722.02	2023.52	2008.1
ENSG00000065534	MYLK	28.9847	4.56316	17.1493	22.2178	14.125	25.1884	27.5427	21.4084
ENSG00000141002	TCF25	2612.83	2170.35	1997.61	2318.55	2091.97	2762.01	2379	2395.59
ENSG00000108510	MED13	3748.38	4724.01	3484.07	2860.66	3333.02	3465.35	3621.86	3312.59
ENSG00000169180	XPO6	3239.74	3845.03	3029.89	2770.81	3053.93	3780.68	2942.76	2918.31
ENSG00000113387	SUB1	3972.31	5506.02	3344.11	2314.6	3165.47	3325.36	2952.23	2996.46
ENSG00000116774	OLFML3	7.47992	11.4079	6.63843	4.93729	4.8707	2.42196	3.44283	1.78403
ENSG00000005339	CREBBP	5843.22	5957.78	4195.49	4015	4025.15	4261.69	4940.46	4591.73
ENSG00000130726	TRIM28	3130.81	3438.91	3173.72	2619.72	2822.08	3268.2	2596.76	2561.51
ENSG00000168264	IRF2BP2	1250.08	1483.6	1413.43	1209.14	1770.5	1582.03	1283.32	1153.55
ENSG00000092295	TGM1	38.8021	38.7869	48.1286	43.9418	64.7803	55.2208	61.1103	34.2534
ENSG00000143537	ADAM15	497.415	583.514	667.162	513.478	493.402	513.456	655.86	555.547
ENSG00000153922	CHD1	3276.21	3517.06	3200.83	2346.69	2943.37	2682.08	2958.25	2434.13
ENSG00000117228	GBP1	1917.66	6094.1	2478.35	1469.83	1267.36	2737.3	2570.94	2334.22
ENSG00000145391	SETD7	2560	1149.35	1282.88	2531.35	1463.65	1647.42	1639.65	1524.27
ENSG00000114354	TFG	1126.2	1277.68	1019.55	920.31	934.688	1019.65	1008.75	936.972
ENSG00000135480	KRT7	38.3346	2.28158	78.0015	3.4561	3.40949	10.1722	389.901	30.3285
ENSG00000099875	MKNK2	2301.95	2865.66	4062.16	3570.15	4263.33	2768.3	3711.37	3526.31
ENSG00000100393	EP300	5236.41	5690.26	4647.45	3989.33	4425.03	4823.1	4676.23	4397.28
ENSG00000103855	CD276	56.5669	88.9816	59.7458	88.3774	64.2933	113.348	111.031	55.6617
ENSG00000104388	RAB2A	881.696	1068.92	829.25	931.666	937.61	829.765	902.022	949.104
ENSG00000123094	RASSF8	7.47992	1.71119	4.97882	9.87457	7.30605	14.5318	13.7713	5.35209
ENSG00000189266	PNRC2	2642.28	2765.85	2129.83	2443.96	2658.92	2705.82	2051.93	2176.87
ENSG00000064607	SUGP2	4128.45	3586.07	3570.92	3630.39	2993.05	4229.72	4134.84	4143.94
ENSG00000168497	CAVIN2	0.467495	0	0	0	0	1.93757	2.58212	1.78403
ENSG00000166949	SMAD3	2507.64	3722.97	2334.51	2339.29	2190.84	3335.53	1890.98	2303.9
ENSG00000161202	DVL3	1620.34	1467.06	1491.99	1592.27	1400.81	1754.95	1919.38	1753.34
ENSG00000137507	LRRC32	323.039	536.171	1397.39	216.747	399.398	440.797	988.954	707.546
ENSG00000171490	RSL1D1	1765.26	2396.23	1698.33	1674.73	1646.3	1472.07	1289.34	1231.34
ENSG00000116288	PARK7	1642.31	2127.57	2301.32	2126.98	2074.43	1594.62	1709.37	2037
ENSG00000116717	GADD45A	2045.76	1271.98	2146.42	1555.25	1681.37	1095.7	1477.84	1119.3
ENSG00000115548	KDM3A	2536.16	2438.44	3724.71	1441.69	4065.57	2132.3	2327.35	1898.56
ENSG00000089159	PXN	896.188	1166.46	1293.39	967.708	1160.69	1228.9	1435.66	774.269
ENSG00000159658	EFCAB14	3120.06	2821.17	3229.04	3409.69	3347.15	3186.82	3120.93	2820.19
ENSG00000154864	PIEZO2	0	0	0	0	1.46121	0.484393	5.16425	1.42722
ENSG00000113712	CSNK1A1	1811.08	2039.73	1903.02	1507.85	2066.15	1870.72	1895.28	1867.16
ENSG00000162231	NXF1	4568.36	4422.84	3804.92	3876.76	3790.87	4808.57	3363.65	4005.15
ENSG00000165502	RPL36AL	2085.96	2389.39	1920.72	2037.12	2391.51	1806.78	1632.76	1791.17
ENSG00000053254	FOXN3	2638.54	2758.43	2811.93	2549.61	2803.58	1680.36	2605.36	2331.73
ENSG00000103811	CTSH	332.389	592.64	364.007	147.625	333.156	868.032	522.45	585.518
ENSG00000129353	SLC44A2	5061.57	4426.84	3820.41	5291.78	4943.76	4878.8	4893.99	4636.34
ENSG00000135624	CCT7	1794.71	2511.45	2550.26	1926.53	1926.36	1950.16	1927.13	2024.16
ENSG00000123338	NCKAP1L	5101.31	4918.52	5006.48	5039.49	5428.4	4314.49	5078.18	5523.71
ENSG00000204469	PRRC2A	2939.14	3398.41	2669.75	2805.37	2814.78	3344.25	2803.33	3499.55
ENSG00000198900	TOP1	1717.58	2440.15	2539.75	1838.65	1839.18	1646.45	1966.72	1877.51
ENSG00000204525	HLA-C	3165.88	2165.22	10785.2	6184.45	11023.9	4390.05	1829	1258.1
ENSG00000132780	NASP	2303.82	2672.87	2134.81	1674.73	2110.96	2166.69	2156.93	2030.94
ENSG00000113580	NR3C1	5991.88	5614.97	3837.01	2156.61	3819.12	4298.98	4012.62	5365.65
ENSG00000127184	COX7C	1622.21	1769.94	1626.97	1771.5	2173.79	1255.06	1463.2	1611.34
ENSG00000124920	MYRF	51.4245	67.877	113.406	73.0718	146.608	55.7052	62.8317	38.8918
ENSG00000100731	PCNX1	5118.6	5559.64	3628.45	4211.51	3953.06	4704.91	3970.45	3443.89
ENSG00000204463	BAG6	1904.11	2489.2	2052.38	1912.21	1989.19	2011.2	1922.82	2242.17
ENSG00000011600	TYROBP	8.41491	7.41514	15.4897	15.7993	19.9699	122.551	35.289	18.1971
ENSG00000113269	RNF130	73.3967	59.8915	70.8099	36.0422	70.1381	55.2208	67.9959	45.3143
ENSG00000164054	SHISA5	3067.23	2879.35	2041.87	2739.21	2356.93	4702	2166.4	2182.22
ENSG00000100941	PNN	4552	3870.13	3502.32	3943.41	3197.13	3902.27	3617.56	3259.42
ENSG00000006327	TNFRSF12A	32.7247	21.675	43.703	14.3181	32.1466	23.7352	43.8961	38.535
ENSG00000138772	ANXA3	26.1797	2.28158	21.5749	0	4.8707	3.87514	28.4034	31.3989
ENSG00000185591	SP1	2630.13	2930.69	2665.33	2455.31	3064.16	2716.96	2823.98	2982.54
ENSG00000111540	RAB5B	2407.13	1904.55	2100.51	2741.68	2673.53	2251.46	2168.98	2549.73
ENSG00000142634	EFHD2	2115.88	2444.14	3212.45	2685.39	3531.26	1968.09	2329.08	2646.07
ENSG00000254999	BRK1	1453.44	1650.72	1794.03	1720.15	2123.14	1368.89	1495.91	1612.76
ENSG00000103479	RBL2	4548.73	3599.76	3606.88	4858.78	4135.71	3153.4	4619.42	3674.39
ENSG00000165637	VDAC2	886.371	1215.51	1058.83	935.616	998.007	869.485	913.211	918.775
ENSG00000164164	OTUD4	2679.21	3985.92	3023.25	2313.61	2920.96	2726.16	2759.43	2227.9
ENSG00000069956	MAPK6	1143.03	1133.38	1235.85	1094.6	1372.56	1178.53	1153.35	964.446
ENSG00000173846	PLK3	1310.86	1243.46	1188.28	1009.18	462.717	1096.67	993.257	569.819
ENSG00000211951	IGHV2-26	0	0	0	19.2554	0	0	0	0
ENSG00000089154	GCN1	3164.01	3813.66	3262.79	3660.5	2935.57	3750.17	3350.74	4020.49
ENSG00000005810	MYCBP2	4938.62	5723.34	4224.81	6101.5	4461.56	4540.21	5445.7	4689.86
ENSG00000134313	KIDINS220	2122.43	2262.19	2327.32	2254.37	2199.12	1841.66	2206	2025.23
ENSG00000008018	PSMB1	1739.08	1943.91	1685.61	1524.14	1600.51	1545.7	1654.28	1670.21
ENSG00000196923	PDLIM7	118.276	120.924	254.473	344.129	239.151	210.711	333.094	243.698
ENSG00000119383	PTPA	1387.99	1480.75	1399.05	1368.62	1528.91	1487.09	1323.77	1524.27
ENSG00000113648	H2AFY	1554.42	2116.74	1866.5	1719.66	1685.75	1760.28	1851.38	1860.03
ENSG00000133226	SRRM1	3121.93	3042.49	2981.76	3026.56	2765.1	3056.52	3037.44	2586.49
ENSG00000007908	SELE	24.7772	15.4007	27.1069	18.7617	5.84484	13.0786	24.9605	16.7699
ENSG00000182087	TMEM259	2933.53	2906.16	2606.14	3206.77	2616.05	3257.54	3144.17	3045.34
ENSG00000124214	STAU1	1919.53	2463.54	1984.34	1734.47	1889.35	2022.82	1948.64	1703.39
ENSG00000111961	SASH1	8.41491	1.14079	4.42562	2.96237	0.97414	15.5006	6.88567	2.14084
ENSG00000107862	GBF1	2675.47	2873.08	2693.54	2632.07	1986.76	2648.17	2676.8	2826.97
ENSG00000211937	IGHV2-5	47.217	0	0	0.493729	0	0.484393	0	19.2675
ENSG00000211935	IGHV1-3	169.233	6.27435	2.21281	4.93729	4.38363	0	2.58212	8.56334
ENSG00000172053	QARS	2322.05	2420.19	1989.87	2175.86	2195.23	1892.04	1824.7	2129.42
ENSG00000141905	NFIC	567.071	693.03	364.56	476.448	480.738	531.379	438.1	461.707
ENSG00000151929	BAG3	482.455	527.615	222.94	149.106	265.94	346.825	196.241	265.107
ENSG00000175061	SNHG29	1243.54	982.22	1153.43	1037.32	1351.62	829.765	1087.94	1014.04
ENSG00000049245	VAMP3	812.506	788.286	692.056	845.757	730.118	1032.73	765.17	733.593
ENSG00000186298	PPP1CC	3951.74	6197.91	2984.53	2853.75	3591.66	5315.73	3116.62	3285.11
ENSG00000106052	TAX1BP1	3360.35	3720.12	2884.4	2678.48	3338.87	2689.35	2644.1	2833.04
ENSG00000166734	CASC4	1236.99	1366.1	1142.92	1106.45	1151.92	1238.11	1219.62	1166.04
ENSG00000113916	BCL6	1500.66	1394.05	890.656	1296.04	960.015	1350	806.484	713.255
ENSG00000113282	CLINT1	2299.61	2231.96	2245.45	1941.34	1944.38	2077.08	2185.34	1807.58
ENSG00000091409	ITGA6	355.296	539.023	494.563	224.153	290.781	356.029	488.882	233.708
ENSG00000063244	U2AF2	3308.93	4069.77	3460.83	3386.48	2932.16	3688.65	3222.49	3202.69
ENSG00000113732	ATP6V0E1	1470.27	1937.63	1819.48	1946.28	2028.65	1769.97	1387.46	1555.67
ENSG00000084733	RAB10	2435.65	2659.75	2822.99	2344.72	2816.73	2247.1	2501.22	2216.83
ENSG00000109072	VTN	8.41491	10.8375	5.53202	6.41847	3.89656	12.5942	9.46779	4.99528
ENSG00000134108	ARL8B	1460.45	1659.28	1226.45	1165.2	1183.58	1422.18	1344.43	1151.06
ENSG00000159674	SPON2	272.082	117.501	132.769	397.452	319.518	243.165	305.551	252.262
ENSG00000023191	RNH1	807.831	955.982	771.164	668.015	762.752	882.079	877.062	793.893
ENSG00000034152	MAP2K3	1046.25	1350.7	2098.3	1111.88	1584.93	1258.94	1560.46	1893.93
ENSG00000116132	PRRX1	10.7524	0	0	43.4481	4.8707	30.0323	0	0.713612
ENSG00000165457	FOLR2	3.27247	0	0	0	0.48707	0.484393	1.72142	1.07042
ENSG00000211933	IGHV6-1	0.467495	0	1.1064	2.96237	0.48707	0	0	19.6243
ENSG00000135932	CAB39	5343	6266.36	6446.47	4257.42	5258.9	3810.23	4696.88	4446.51
ENSG00000095951	HIVEP1	2127.57	2521.15	1831.1	1123.23	1835.28	1823.25	1973.6	2283.56
ENSG00000079432	CIC	2649.76	2927.27	2510.43	2226.72	2363.75	2508.67	2526.18	2299.61
ENSG00000275993	SIK1B	118.276	167.696	153.237	24.6864	147.582	131.755	201.406	84.2062
ENSG00000122641	INHBA	33.6596	0	15.4897	54.8039	25.8147	180.678	20.657	17.4835
ENSG00000134287	ARF3	1443.16	1595.97	1546.2	1528.58	1751.5	1605.76	1542.39	1707.32
ENSG00000169871	TRIM56	3695.08	3257.53	3340.23	3726.17	3436.28	4956.79	3828.43	4429.74
ENSG00000214063	TSPAN4	41.6071	41.6388	52.5542	37.5234	28.2501	61.5179	44.7568	25.69
ENSG00000104368	PLAT	89.759	112.938	473.541	41.9669	107.643	191.335	407.115	713.255
ENSG00000065154	OAT	272.55	317.71	403.838	253.777	268.863	237.352	269.402	300.431
ENSG00000108588	CCDC47	913.953	1327.88	1287.3	954.377	1221.57	1090.85	992.397	924.484
ENSG00000123240	OPTN	3696.95	4591.68	4206.55	3998.21	3925.79	4623.04	3998.85	3850.29
ENSG00000140678	ITGAX	107.056	330.829	229.026	650.734	278.604	275.619	204.849	407.472
ENSG00000142102	PGGHG	4152.76	5820.31	1520.75	3945.88	6767.84	4169.17	4117.63	10571.1
ENSG00000100991	TRPC4AP	4951.71	3630.56	3298.19	4603.53	3422.16	4776.6	4464.49	4493.61
ENSG00000182809	CRIP2	25.2447	60.4619	72.4695	7.89966	3.89656	12.5942	50.7818	9.99056
ENSG00000143924	EML4	10424.7	7346.69	7529.64	6711.75	8168.65	7087.15	8430.64	7668.47
ENSG00000171298	GAA	406.721	299.457	265.537	607.78	609.325	806.029	655.86	373.933
ENSG00000085224	ATRX	5903.99	5079.94	5537	4550.7	5138.1	4123.63	4969.73	4254.55
ENSG00000130024	PHF10	3780.63	3070.44	3162.66	3133.2	3186.41	3231.87	3391.19	2729.92
ENSG00000134516	DOCK2	5644.07	6956.54	6893.45	5854.63	6882.3	5074.5	6313.29	6875.65
ENSG00000136279	DBNL	2471.65	2420.19	2970.14	2941.14	2952.62	2344.94	2863.58	2682.47
ENSG00000138768	USO1	1700.28	2008.36	1896.93	1576.97	1870.35	1426.05	1773.92	1668.42
ENSG00000142166	IFNAR1	907.408	1016.44	1470.96	1224.45	1536.22	1284.12	1438.24	1078.62
ENSG00000184743	ATL3	1129.47	1355.83	1438.33	864.519	1212.8	1079.71	1345.29	1313.76
ENSG00000215021	PHB2	1452.97	1407.16	1321.6	1633.25	1461.7	1177.56	1254.05	1413.31
ENSG00000100934	SEC23A	1034.1	1071.2	1170.02	900.067	1142.67	948.441	1174.87	1004.41
ENSG00000159377	PSMB4	2764.77	2819.46	2559.11	2293.86	2586.34	2351.73	2199.11	2347.07
ENSG00000105698	USF2	3314.07	3073.29	2518.73	3114.93	3368.09	3032.3	2773.2	3579.12
ENSG00000153914	SREK1	4619.79	5642.92	3062.53	2852.76	2601.44	2870.51	3188.06	3068.53
ENSG00000054523	KIF1B	962.105	878.979	860.229	956.846	825.584	734.339	1046.62	902.719
ENSG00000167779	IGFBP6	2.80497	0	0	1.48119	0.97414	0	12.0499	0.356806
ENSG00000165102	HGSNAT	1493.18	1063.22	1332.66	885.749	1153.38	1060.82	1534.64	1352.29
ENSG00000198833	UBE2J1	1606.31	1654.72	1624.75	1394.29	1461.21	1405.22	1250.61	1333.03
ENSG00000169418	NPR1	0.93499	1.71119	0	0	0.97414	9.68785	0.860708	1.78403
ENSG00000117362	APH1A	1568.91	1612.51	1436.67	1631.77	1658.47	1592.68	1315.16	1534.62
ENSG00000137269	LRRC1	67.7868	59.8915	48.6818	25.6739	80.8536	102.691	50.7818	43.5303
ENSG00000138594	TMOD3	1504.87	1633.61	1705.52	1289.13	1698.41	1173.2	1445.13	1641.66
ENSG00000067066	SP100	8876.8	10688.6	5808.62	4347.28	4709.97	9683.49	5779.66	5679.28
ENSG00000169967	MAP3K2	3742.3	4040.11	3423.77	1895.42	2792.86	2707.76	3332.66	2515.84
ENSG00000091592	NLRP1	8656.14	6283.47	6751.83	8225.52	6243.75	6549.96	7569.07	7433.34
ENSG00000162613	FUBP1	3793.25	4434.25	3715.31	3703.95	2790.91	3472.61	3607.23	4103.98
ENSG00000119396	RAB14	2066.8	2367.71	1891.4	1734.96	1625.84	1968.09	1883.23	1754.06
ENSG00000130202	NECTIN2	34.1271	7.41514	16.5961	9.38084	21.9182	93.9722	32.7069	11.7746
ENSG00000132155	RAF1	2843.3	2765.85	2840.14	2410.88	2326.73	2822.07	2603.64	2387.39
ENSG00000115464	USP34	4799.77	5251.06	4116.38	4698.32	4681.72	3781.17	4764.02	3926.65
ENSG00000156273	BACH1	2609.56	1449.94	980.828	1214.57	1057.92	1875.57	1468.37	1218.85
ENSG00000170873	MTSS1	402.046	731.817	95.1508	375.234	417.906	321.152	283.173	609.781
ENSG00000072786	STK10	6435.54	5957.21	5274.23	6036.82	5314.42	5166.53	5567.92	5822
ENSG00000145901	TNIP1	5109.72	5997.13	7388.02	6761.12	6619.28	6595.97	4815.66	6294.41
ENSG00000196954	CASP4	1630.62	1537.79	1545.09	2228.69	2012.09	2059.64	1709.37	1704.1
ENSG00000102760	RGCC	1628.75	1509.27	1781.31	563.344	622.963	1166.9	1241.14	459.923
ENSG00000173482	PTPRM	108.926	215.609	128.343	31.1049	277.63	176.319	310.716	171.98
ENSG00000019169	MARCO	10.2849	0	75.7887	0	4.38363	34.3919	20.657	1.78403
ENSG00000244754	N4BP2L2	6189.17	4624.19	5801.43	6641.14	4558.49	5420.84	6041.31	4916.07
ENSG00000171314	PGAM1	1605.38	2478.94	2389.28	1239.26	2801.14	1551.03	1327.21	1890.71
ENSG00000008710	PKD1	1023.35	1293.66	1407.9	1238.27	1424.19	1673.09	1407.26	1540.33
ENSG00000102054	RBBP7	2069.6	2446.42	2581.79	1773.97	2005.27	1789.35	1772.2	2057.7
ENSG00000169594	BNC1	0	0	0	0	1.94828	0	4.30354	0
ENSG00000055208	TAB2	8751.51	11585.3	10642	6387.86	8699.07	8265.19	8144.88	6855.31
ENSG00000084112	SSH1	5789.46	4737.7	5655.39	3833.8	5052.38	3714.81	4681.39	6699.39
ENSG00000198682	PAPSS2	122.484	128.339	107.874	86.8962	81.8278	134.661	82.628	59.2298
ENSG00000081154	PCNP	3358.95	3460.02	2973.46	3042.85	3024.22	2797.37	2817.96	2906.54
ENSG00000104964	AES	3733.42	4864.33	4047.78	4867.18	4217.54	4356.63	4678.81	4364.45
ENSG00000116574	RHOU	7.47992	17.6822	33.1921	3.4561	32.6337	36.3295	22.3784	11.7746
ENSG00000175582	RAB6A	1726.46	1850.36	1641.9	1620.91	2001.37	1601.89	1650.84	1682.7
ENSG00000095794	CREM	2984.49	1953.03	3898.97	860.569	3588.25	1622.23	2887.68	2988.61
ENSG00000101199	ARFGAP1	1607.25	1566.3	1459.9	1959.12	1509.92	2092.58	1786.83	1899.99
ENSG00000147010	SH3KBP1	3983.06	3872.41	3958.16	4663.27	4755.27	3258.51	3699.32	3850.65
ENSG00000139182	CLSTN3	2445.93	2285.57	2800.31	1814.45	3692.97	2351.73	3174.29	3726.84
ENSG00000152484	USP12	2695.58	3868.42	3624.03	1691.02	2022.32	1935.15	2445.27	1865.74
ENSG00000140612	SEC11A	1257.09	1321.61	1271.26	1175.57	1574.21	1496.29	1371.97	1569.59
ENSG00000138759	FRAS1	5.14245	2.28158	2.76601	0	1.94828	0	0	1.78403
ENSG00000120694	HSPH1	1570.78	2147.54	2560.77	885.749	874.778	1370.35	1393.49	963.019
ENSG00000048707	VPS13D	2836.29	2775.54	2731.71	3226.02	2791.89	2694.19	2883.37	3083.87
ENSG00000060718	COL11A1	0	0	0	0	0.97414	0.484393	0	0
ENSG00000173039	RELA	2837.23	2927.27	2517.62	2643.42	2320.89	3219.76	2283.46	2286.77
ENSG00000133142	TCEAL4	237.955	200.209	299.282	409.301	290.294	294.995	304.691	245.839
ENSG00000103966	EHD4	800.351	1801.31	1051.64	418.682	772.493	1188.22	969.157	951.601
ENSG00000188612	SUMO2	1786.3	2080.23	1806.76	1617.46	2109.99	1666.8	1839.33	1904.63
ENSG00000161547	SRSF2	3438.89	3467.43	2726.18	2362.99	2259.03	2843.38	2542.53	2643.22
ENSG00000026950	BTN3A1	5658.56	5667.45	5283.63	8266.5	5925.7	8185.27	7898.72	6180.95
ENSG00000254087	LYN	88.3566	10.2671	76.8951	18.7617	29.2242	150.646	95.5386	50.3096
ENSG00000145362	ANK2	7.47992	9.69672	0.553202	0.987457	2.43535	1.45318	1.72142	1.78403
ENSG00000007202	KIAA0100	2591.79	2867.95	2673.07	2664.65	2425.12	2938.33	2580.4	2678.54
ENSG00000168488	ATXN2L	3987.27	5103.32	4312.21	4429.24	4221.44	4739.3	4492.04	4637.41
ENSG00000172137	CALB2	0	0	0	0	0.97414	0.968785	0.860708	0.356806
ENSG00000115183	TANC1	17.7648	0	2.76601	1.97491	8.76726	8.71907	21.5177	6.42251
ENSG00000198805	PNP	200.555	334.822	367.326	198.479	175.832	282.885	266.82	204.45
ENSG00000162496	DHRS3	26.6472	61.0323	129.449	33.5735	55.526	53.2832	53.3639	22.8356
ENSG00000152102	FAM168B	2446.4	2693.98	2761.03	2622.69	2750.49	2043.17	2687.99	2600.4
ENSG00000115762	PLEKHB2	1949.92	2185.75	2690.22	1708.3	2165.03	1876.54	2349.73	2234.32
ENSG00000108582	CPD	1165	1244.03	1493.09	1084.72	1852.33	901.455	1277.29	1483.96
ENSG00000108219	TSPAN14	5264.46	4834.67	3885.14	4602.04	4367.56	5147.16	4626.31	4594.23
ENSG00000143612	C1orf43	1538.53	1484.17	1489.77	1420.46	1654.58	1656.14	1416.73	1478.25
ENSG00000141867	BRD4	3874.6	4268.27	3242.32	3309.46	2776.79	3566.1	3396.35	3294.39
ENSG00000101384	JAG1	41.1396	18.2526	8.29803	8.39339	39.4527	31.4855	28.4034	19.2675
ENSG00000164125	GASK1B	0.93499	0.570395	6.08522	1.48119	1.46121	43.5953	12.9106	2.14084
ENSG00000114861	FOXP1	2995.24	2371.13	3154.36	2797.47	1714	3640.21	2222.35	1663.43
ENSG00000150782	IL18	5.14245	2.85198	3.87242	0.987457	6.33191	21.3133	6.88567	2.85445
ENSG00000148700	ADD3	3751.18	3235.28	3131.68	2851.28	2911.22	3088.49	3690.72	2324.59
ENSG00000122884	P4HA1	575.486	373.038	1641.35	442.875	1899.09	446.126	438.1	430.665
ENSG00000031698	SARS	1726.46	1829.26	1994.29	1888.51	1956.07	1928.37	1757.57	1794.73
ENSG00000164104	HMGB2	2044.82	1672.4	1432.79	2512.09	2833.77	1945.32	1964.14	3489.2
ENSG00000176788	BASP1	82.2791	140.317	60.299	34.561	55.0389	200.054	79.1852	126.666
ENSG00000064601	CTSA	1374.9	1210.95	1604.29	1965.53	1650.19	1771.42	1650.84	1790.45
ENSG00000014216	CAPN1	1983.11	2295.27	2016.98	1740.89	2074.92	1935.15	1989.96	2385.6
ENSG00000101938	CHRDL1	7.94742	6.27435	0	0	0	0	0	0
ENSG00000124151	NCOA3	4775.46	5503.17	5223.34	3973.03	3253.63	3530.74	5294.22	4366.95
ENSG00000126012	KDM5C	3020.02	3481.12	2999.46	2713.04	2998.4	3019.7	4391.33	4705.91
ENSG00000119777	TMEM214	789.599	922.329	1041.13	1053.62	950.274	1053.55	963.132	996.916
ENSG00000070614	NDST1	14.4923	23.3862	19.3621	12.3432	23.3794	76.0496	29.2641	16.0563
ENSG00000117450	PRDX1	901.798	1179.58	1204.87	1026.96	1042.33	812.811	1060.39	1105.38
ENSG00000101972	STAG2	3848.42	4597.38	3510.07	3052.72	3680.3	2993.06	3362.79	3172.72
ENSG00000010322	NISCH	4329	3227.87	3710.88	4440.1	3832.76	4296.56	4022.95	4098.27
ENSG00000104774	MAN2B1	1492.71	1427.13	1705.52	1590.3	1618.53	1548.6	1512.26	1675.56
ENSG00000234741	GAS5	2062.12	2201.73	1833.31	1509.82	1619.02	1553.93	1417.59	1324.46
ENSG00000101265	RASSF2	785.859	1062.65	1052.74	625.06	1180.17	1049.19	1399.51	1867.52
ENSG00000196504	PRPF40A	3648.33	3428.64	3217.98	2620.22	2858.13	3107.38	3077.03	3063.18
ENSG00000143545	RAB13	20.5698	18.2526	18.8089	12.8369	20.944	101.238	24.9605	12.1314
ENSG00000101182	PSMA7	1487.1	2021.48	2053.49	1577.46	1530.86	1884.29	1722.28	1849.32
ENSG00000196712	NF1	2400.59	2421.9	1873.14	3237.87	2495.26	2685.96	1997.7	1728.01
ENSG00000111011	RSRC2	5041.47	4892.28	3052.57	2942.13	2828.9	4222.45	3103.71	3046.41
ENSG00000111229	ARPC3	1681.58	1933.64	1592.12	1675.72	1642.4	1706.03	1567.35	1657.72
ENSG00000197535	MYO5A	5148.06	4283.1	3601.35	5094.79	4002.74	3473.58	3907.62	3160.23
ENSG00000108861	DUSP3	192.608	103.242	344.645	180.211	443.721	246.556	216.038	213.37
ENSG00000225614	ZNF469	69.6568	74.7218	141.067	122.445	124.203	102.691	142.017	290.44
ENSG00000133313	CNDP2	2552.06	2585.6	2179.06	2232.15	1731.05	2693.71	2017.5	2018.45
ENSG00000113645	WWC1	29.9197	12.5487	17.1493	26.6613	24.3535	3.39075	26.682	11.4178
ENSG00000089248	ERP29	1517.96	1375.22	1724.33	1439.22	1900.06	1787.41	1347.01	1446.85
ENSG00000119689	DLST	1968.62	1842.38	1797.91	2083.04	1687.21	1817.44	1739.49	1724.09
ENSG00000139641	ESYT1	2333.74	2974.04	3421.56	2743.16	3103.61	1935.63	3314.59	3102.07
ENSG00000174695	TMEM167A	1464.66	1283.96	1275.13	1274.81	1430.53	1719.11	1561.32	1399.04
ENSG00000110906	KCTD10	769.964	883.542	781.675	827.489	807.075	827.827	865.872	1020.82
ENSG00000116350	SRSF4	3581.95	4358.39	3568.71	2919.91	2856.18	3280.31	3429.06	3042.48
ENSG00000134644	PUM1	2566.55	2518.86	2451.24	2147.23	2092.45	2379.34	2285.18	2023.45
ENSG00000197111	PCBP2	2053.71	2452.13	1717.14	1679.66	1629.74	1677.94	1416.73	1311.62
ENSG00000198856	OSTC	538.087	645.687	636.736	556.926	581.562	458.72	531.057	532.354
ENSG00000197930	ERO1A	1806.87	1951.32	2650.94	1455.02	3200.05	1712.81	2009.75	1817.21
ENSG00000153147	SMARCA5	2917.17	3737.23	3145.51	2875.48	3199.08	2766.37	2864.44	2766.67
ENSG00000088930	XRN2	2348.7	2826.88	2009.23	2126.98	2049.1	1883.8	2194.81	1971.35
ENSG00000091317	CMTM6	5810.96	11762.7	9657.25	2216.35	3674.46	2921.86	7576.81	5533.7
ENSG00000184588	PDE4B	2897.53	3444.05	5494.4	3966.62	5009.03	3223.63	6947.64	5554.75
ENSG00000184787	UBE2G2	2737.65	3177.67	3131.12	3384.02	2170.87	2595.38	3012.48	2483.01
ENSG00000143772	ITPKB	3811.49	2999.71	2859.5	2873.5	3993.49	2990.16	3294.79	3687.23
ENSG00000243566	UPK3B	8.88241	0	3.87242	6.41847	7.79312	5.81271	5.16425	4.99528
ENSG00000116171	SCP2	1299.64	1522.95	1322.71	1404.66	1530.37	1202.75	1316.88	1339.45
ENSG00000188313	PLSCR1	793.339	1163.61	520.01	371.284	368.225	1705.55	659.302	818.156
ENSG00000253276	CCDC71L	304.339	298.887	692.609	488.791	443.234	357.966	460.479	341.106
ENSG00000109787	KLF3	458.613	739.232	1146.23	271.057	728.17	801.185	804.762	401.763
ENSG00000088387	DOCK9	1721.78	2282.72	2185.7	1500.94	1814.82	1502.1	1602.64	1967.07
ENSG00000115641	FHL2	27.5822	25.6678	32.6389	39.4983	37.5044	29.0636	29.2641	32.4693
ENSG00000198752	CDC42BPB	100.044	111.797	126.683	28.1425	46.7587	89.1283	141.156	58.873
ENSG00000130303	BST2	1318.8	2379.12	1429.47	887.23	1025.28	2871.96	982.929	1428.29
ENSG00000065882	TBC1D1	713.865	1166.46	716.95	840.326	791.489	963.941	828.001	634.044
ENSG00000187239	FNBP1	7183.53	7807.57	6600.81	6551.78	8644.03	5748.29	5752.11	7070.46
ENSG00000065135	GNAI3	1471.21	1940.48	1730.42	1132.12	1472.41	1410.07	1551.86	1466.83
ENSG00000113384	GOLPH3	1816.69	2401.93	2106.04	1586.84	1985.79	1770.46	1999.43	1833.27
ENSG00000118971	CCND2	4113.02	6102.66	7756.45	2793.02	4078.24	2364.32	5801.17	4305.58
ENSG00000189091	SF3B3	3061.62	3450.89	3477.43	3420.55	3201.03	3554.47	3182.9	3223.38
ENSG00000110841	PPFIBP1	71.5267	164.274	113.406	34.561	72.5735	130.302	152.345	53.5209
ENSG00000162368	CMPK1	2647.42	2797.22	2540.3	2017.38	2741.72	1877.51	2585.57	2313.53
ENSG00000196154	S100A4	3660.49	4667.54	5857.86	4000.19	5381.64	3370.89	4165.83	4213.88
ENSG00000211637	IGLV4-69	48.6195	0	0	28.1425	0	0	0	0.713612
ENSG00000164190	NIPBL	3809.15	4040.68	3278.28	2986.07	3468.43	3007.59	3372.25	3119.91
ENSG00000137462	TLR2	14.0249	0.570395	17.1493	11.3558	16.5604	196.663	37.8712	14.2722
ENSG00000186716	BCR	817.649	909.21	781.122	570.75	934.688	1035.63	1072.44	1065.78
ENSG00000115216	NRBP1	2705.86	3261.52	2630.48	2079.09	2246.37	2824.49	2549.42	2538.67
ENSG00000276775	IGHV4-4	8.88241	2.85198	0	0	0	0	0	0
ENSG00000184863	RBM33	5080.27	3858.72	3385.04	3426.97	3606.75	4260.72	3564.19	3929.5
ENSG00000163938	GNL3	798.482	1451.66	975.849	631.479	606.889	668.946	777.219	719.321
ENSG00000188643	S100A16	18.6998	0	11.6172	1.48119	27.2759	1.93757	49.0604	31.0421
ENSG00000102158	MAGT1	962.105	1082.04	1208.75	1025.47	1042.82	924.221	1063.84	1124.3
ENSG00000052795	FNIP2	137.911	255.537	237.877	417.694	229.41	279.01	175.584	165.201
ENSG00000102580	DNAJC3	942.937	1422.57	1146.79	858.594	900.593	891.283	921.818	879.883
ENSG00000125977	EIF2S2	1163.13	1540.07	1601.52	1165.2	1440.75	1208.08	1186.92	1283.43
ENSG00000136436	CALCOCO2	1736.74	2100.77	2562.99	2436.06	2090.99	2112.92	1921.96	1747.99
ENSG00000121892	PDS5A	3309.86	4633.89	3414.92	2804.38	3362.25	2813.84	3418.73	3136.68
ENSG00000166226	CCT2	1234.65	1803.59	1621.99	1044.73	1131.95	1079.71	1155.93	1208.5
ENSG00000136048	DRAM1	107.991	123.205	158.216	198.973	91.5692	201.992	113.613	81.3517
ENSG00000196141	SPATS2L	1998.07	2490.92	1066.02	1127.18	1177.25	2606.03	1727.44	1427.22
ENSG00000112739	PRPF4B	4767.98	4334.43	4261.32	4402.08	4362.69	3915.83	4437.81	4247.42
ENSG00000137312	FLOT1	711.06	1681.52	1348.71	848.226	993.623	919.862	892.554	929.479
ENSG00000025293	PHF20	1036.9	1066.07	1234.75	1104.96	1354.54	909.205	936.45	994.061
ENSG00000174282	ZBTB4	3059.75	2850.83	3288.23	3885.15	3818.14	3268.2	3328.36	2755.61
ENSG00000165030	NFIL3	100.511	323.984	116.726	3	159.759	145.318	102.424	276.881
ENSG00000163714	U2SURP	3859.64	4725.72	3973.65	4047.59	4021.25	3824.28	4126.23	3520.96
ENSG00000111319	SCNN1A	15.4273	3.42237	39.2774	2.96237	18.0216	1.93757	62.8317	6.42251
ENSG00000009954	BAZ1B	3245.35	3334.53	3609.64	3220.1	3526.39	3366.53	3097.69	3222.31
ENSG00000107551	RASSF4	36.4646	51.3356	34.8517	78.9966	48.707	268.354	87.7922	49.2392
ENSG00000171206	TRIM8	801.286	963.397	906.145	855.138	975.602	1024.49	1085.35	1066.85
ENSG00000020181	ADGRA2	0	6.27435	1.1064	8.88712	1.94828	4.35953	0.860708	0.356806
ENSG00000123146	ADGRE5	2710.54	5460.39	2865.59	1414.04	2267.8	2101.78	2429.78	2652.85
ENSG00000108091	CCDC6	1916.26	2929.55	1505.82	818.108	1986.76	1181.43	1419.31	1471.47
ENSG00000177374	HIC1	44.8795	120.353	168.727	160.956	46.2717	26.6416	61.1103	92.7695
ENSG00000196961	AP2A1	1253.82	1155.62	1246.36	1366.64	1272.23	1333.53	1427.05	1398.32
ENSG00000167244	IGF2	0.467495	0.570395	0	0	0.48707	0	0.860708	0
ENSG00000159202	UBE2Z	3020.95	4057.79	2678.05	2486.42	2722.24	2990.16	2517.57	2459.46
ENSG00000010404	IDS	9097.92	7534.35	5695.22	5322.89	5903.29	6436.13	5752.11	5310.7
ENSG00000089327	FXYD5	4206.52	3965.96	4075.99	3334.64	4302.78	3698.34	4442.98	4668.45
ENSG00000129625	REEP5	1300.57	1642.74	1618.67	1262.96	1567.39	1281.7	1493.33	1329.1
ENSG00000099995	SF3A1	3291.16	3413.81	3232.91	3941.44	3172.78	3512.82	3114.9	3059.97
ENSG00000068305	MEF2A	597.926	747.788	525.542	534.708	460.768	503.284	716.109	520.223
ENSG00000154845	PPP4R1	938.73	1299.36	1194.36	631.479	828.019	919.862	1106.87	1040.45
ENSG00000123933	MXD4	1997.61	1550.33	1605.39	2886.83	2683.27	1960.82	2422.89	2857.3
ENSG00000109180	OCIAD1	2107.47	1970.14	2082.81	2004.04	2052.03	1738.49	1999.43	1984.55
ENSG00000116786	PLEKHM2	1221.56	1367.24	1175	1153.35	1249.82	1505.01	1361.64	1395.47
ENSG00000163975	MELTF	39.7371	19.9638	12.1704	7.89966	18.0216	26.1572	41.314	45.6711
ENSG00000173744	AGFG1	2472.58	4039.54	2377.11	1804.08	1702.8	2241.28	2512.41	2187.58
ENSG00000119729	RHOQ	222.528	188.801	340.219	326.355	247.432	268.354	340.84	219.436
ENSG00000102699	PARP4	3424.4	3152	2430.22	2791.05	3700.76	3360.72	3329.22	3380.02
ENSG00000113070	HBEGF	28.5172	30.2309	112.3	13.8244	50.6553	81.378	52.5032	49.596
ENSG00000182446	NPLOC4	3263.12	2693.98	2569.62	3094.69	3075.36	3043.92	2759.43	3503.48
ENSG00000114554	PLXNA1	409.058	941.152	759.547	326.355	603.48	646.18	582.699	556.974
ENSG00000069020	MAST4	2438.92	1971.29	2863.93	1453.54	1638.5	1538.43	2385.88	2115.15
ENSG00000135842	FAM129A	9117.09	7200.67	6944.9	5369.3	7192.57	5359.8	5830.44	6758.26
ENSG00000104332	SFRP1	3.73996	0	0	0	7.30605	0.484393	0	0
ENSG00000157540	DYRK1A	3627.76	4449.08	3281.6	2657.74	3078.77	3253.18	3460.05	2957.56
ENSG00000149428	HYOU1	1088.33	2600.43	1780.76	1377.5	1621.94	1310.28	1293.64	1757.63
ENSG00000183722	LHFPL6	39.2696	199.068	21.5749	15.3056	18.0216	111.41	52.5032	109.539
ENSG00000117394	SLC2A1	491.337	728.965	815.973	404.857	1056.94	555.114	561.182	685.067
ENSG00000145824	CXCL14	1.86998	0	4.97882	0	0	0	7.74637	0
ENSG00000168175	MAPK1IP1L	2799.36	2623.82	2431.88	2238.57	2169.9	2583.75	2239.56	1969.57
ENSG00000282639	IGHV3-64D	0	0	0	0	0	0	0.860708	0
ENSG00000185825	BCAP31	1146.3	1545.77	1612.03	1263.45	1575.18	1469.65	1284.18	1354.79
ENSG00000123104	ITPR2	2119.15	1899.99	1961.1	1014.12	1976.04	1143.65	1666.33	1508.58
ENSG00000169223	LMAN2	1136.01	1193.84	1304.45	1292.09	1390.59	1505.49	1368.53	1572.44
ENSG00000115758	ODC1	1701.21	2123.01	1454.37	1458.97	1335.55	1663.4	1213.6	1287.71
ENSG00000175115	PACS1	3905.92	3312.85	3302.06	5872.9	3601.88	3625.19	3655.43	3392.15
ENSG00000148848	ADAM12	287.977	1599.96	373.411	378.69	325.85	1008.51	269.402	298.29
ENSG00000124357	NAGK	1198.19	1349.55	1562.8	1570.06	1007.75	1699.73	1440.83	1225.98
ENSG00000129667	RHBDF2	736.772	645.117	349.624	218.228	541.622	725.62	647.253	1222.42
ENSG00000198663	C6orf89	2682.02	2622.11	2219.45	2456.3	2698.86	2855.98	2606.22	2849.45
ENSG00000203485	INF2	973.792	1173.3	1392.96	807.246	1303.4	1409.1	1374.55	1219.21
ENSG00000211970	IGHV4-61	7.47992	2.85198	0	9.87457	0	0	0	6.0657
ENSG00000197448	GSTK1	3502.47	3844.46	3329.72	4151.76	3126.02	4016.58	3368.81	3051.4
ENSG00000118564	FBXL5	1564.71	1601.1	1460.45	1609.06	1384.25	1139.78	1461.48	1327.32
ENSG00000117500	TMED5	1812.95	2127	2362.73	1539.94	1773.42	1960.82	1794.58	1540.69
ENSG00000055917	PUM2	4863.35	5563.63	5028.05	4156.7	4828.81	4193.87	4906.04	4347.32
ENSG00000241294	IGKV2-24	39.2696	9.69672	0	0	15.0992	0	0	30.3285
ENSG00000179195	ZNF664	1499.26	1447.09	1720.46	1829.76	1971.66	1493.87	1446.85	1337.31
ENSG00000101773	RBBP8	342.206	564.691	823.718	205.391	370.66	272.713	479.414	469.2
ENSG00000120549	KIAA1217	75.2667	130.62	40.3838	40.9795	45.2975	91.0658	188.495	111.323
ENSG00000196616	ADH1B	0	0	0	0	0	0	0	0
ENSG00000142627	EPHA2	35.9971	0	3.87242	0	26.3018	2.90636	35.289	27.1172
ENSG00000206384	COL6A6	0	0	2.21281	2.46864	0.48707	0.968785	2.58212	3.21125
ENSG00000141503	MINK1	3247.69	3657.94	3479.64	3858.98	4143.02	5086.61	3546.98	3784.64
ENSG00000111371	SLC38A1	7434.57	7479.02	8358.89	7682.91	8934.82	6457.44	7559.6	7274.56
ENSG00000117713	ARID1A	4283.66	4830.11	4039.48	3361.3	3814.25	3535.1	3988.52	3533.09
ENSG00000085832	EPS15	4010.17	3272.93	3045.93	4381.35	3447	3870.3	3455.74	3439.97
ENSG00000137177	KIF13A	11.2199	1.71119	14.3833	2.96237	22.8923	27.6104	24.0998	9.63376
ENSG00000146072	TNFRSF21	28.9847	3.42237	54.2138	7.89966	12.6638	6.7815	98.9814	10.7042
ENSG00000156052	GNAQ	1127.6	1271.41	1426.16	618.148	1297.55	946.988	1180.03	823.865
ENSG00000100100	PIK3IP1	5574.41	3103.52	4211.53	6301.46	6405.95	7182.57	5188.35	5065.93
ENSG00000115956	PLEK	82.7466	34.2237	90.172	603.336	137.354	299.839	66.2745	92.4127
ENSG00000134440	NARS	1815.28	1818.99	1836.63	1770.51	1683.8	1722.98	1656	1472.18
ENSG00000143341	HMCN1	57.0344	21.1046	111.194	104.177	44.3234	117.223	86.0708	66.0091
ENSG00000125772	GPCPD1	3473.96	2308.39	2089.44	3347.48	3163.03	2712.6	2330.8	2403.8
ENSG00000131669	NINJ1	513.31	999.332	679.886	605.311	1053.53	791.013	675.656	836.71
ENSG00000146535	GNA12	2001.81	1511.55	1294.49	1160.76	2084.66	1343.22	1322.05	2224.33
ENSG00000108950	FAM20A	76.2017	71.8698	80.2143	63.1973	94.9787	105.598	113.613	88.4878
ENSG00000142910	TINAGL1	18.2323	0.570395	13.8301	0.493729	15.0992	1.45318	12.0499	1.07042
ENSG00000084652	TXLNA	1638.57	2129.86	2051.83	2111.18	2069.07	2183.64	2054.51	2129.06
ENSG00000099917	MED15	3879.27	3839.9	4234.21	4352.71	3587.27	3984.13	3654.57	3690.09
ENSG00000107104	KANK1	35.9971	46.202	18.8089	66.1596	49.6812	50.3768	92.9565	47.0984
ENSG00000117616	RSRP1	3910.13	2660.89	2726.18	3347.48	2505	4383.75	3108.88	3456.02
ENSG00000068878	PSME4	3712.38	3162.84	3762.88	2998.91	2495.75	2188	3253.48	2733.49
ENSG00000088766	CRLS1	310.417	315.428	500.648	315.986	425.212	307.589	323.626	300.787
ENSG00000110079	MS4A4A	7.94742	0	13.8301	5.92474	5.84484	18.4069	6.88567	2.14084
ENSG00000166747	AP1G1	3390.27	3379.02	2868.35	2627.13	2503.54	2514.97	2675.08	2884.78
ENSG00000089351	GRAMD1A	4161.17	3306.58	2674.73	2925.84	3711.96	3515.24	3149.33	3970.89
ENSG00000124155	PIGT	1218.29	1100.86	903.932	1220	967.321	1158.67	924.401	1000.84
ENSG00000100403	ZC3H7B	2151.41	3103.52	2747.2	2400.51	2296.54	2569.22	2187.06	2706.02
ENSG00000166927	MS4A7	14.4923	0	9.40444	15.3056	20.4569	38.7514	30.1248	6.77931
ENSG00000125970	RALY	1783.03	1854.35	1825.01	1816.43	1919.54	1958.88	1878.07	2190.43
ENSG00000178980	SELENOW	850.841	619.449	833.123	1072.87	827.532	804.576	846.937	804.24
ENSG00000183696	UPP1	1293.56	1046.1	1484.24	808.728	1049.15	1062.76	1618.99	1164.26
ENSG00000012817	KDM5D	4728.24	3704.15	3945.99	5090.84	3105.07	3471.16	0.860708	0
ENSG00000189043	NDUFA4	1078.98	1137.37	1089.81	926.235	1117.34	852.531	1007.89	1048.65
ENSG00000100241	SBF1	4675.42	4963.01	5409.21	4508.24	5450.32	5023.64	5835.6	5951.16
ENSG00000062485	CS	1941.04	2494.34	2343.36	2073.17	1820.18	1784.99	2102.71	1848.25
ENSG00000160213	CSTB	610.081	627.435	754.015	613.705	847.989	598.709	671.352	638.682
ENSG00000111145	ELK3	1923.74	2145.26	1886.42	1600.17	2224.94	1812.6	2137.14	2018.81
ENSG00000101109	STK4	6698.74	5689.12	5554.7	6326.64	5788.34	6020.52	6352.03	5889.08
ENSG00000114416	FXR1	1845.67	1954.74	1949.48	1512.78	2019.88	1533.1	1606.08	1662
ENSG00000158985	CDC42SE2	10338.2	9173.66	7384.7	8296.12	10362.4	8402.28	7870.32	7856.15
ENSG00000137776	SLTM	3833.46	4306.48	3720.28	3521.77	3277.5	3849.95	3823.27	3076.74
ENSG00000026103	FAS	4003.63	5516.29	3562.07	4383.32	3501.06	3473.58	3935.16	4056.53
ENSG00000162521	RBBP4	2560.47	2502.32	2280.85	2917.44	2787.5	2566.31	2425.48	2801.28
ENSG00000204843	DCTN1	1807.34	1858.35	1768.59	1836.18	1934.64	1908.51	1599.2	1918.9
ENSG00000172115	CYCS	1159.39	1700.35	1516.33	1047.2	1064.25	1107.32	1056.95	1012.26
ENSG00000118217	ATF6	943.405	1098.01	999.083	877.356	931.765	1008.51	976.043	939.47
ENSG00000005022	SLC25A5	960.235	1245.74	1149.55	818.602	1138.77	827.827	899.44	978.005
ENSG00000169567	HINT1	1968.62	1901.13	1745.35	1672.26	2474.8	1647.42	1778.22	1796.16
ENSG00000165629	ATP5F1C	1250.55	1567.45	1459.9	1359.23	1619.51	1217.28	1363.36	1471.47
ENSG00000114120	SLC25A36	1956.47	1521.81	1433.35	1768.04	1919.54	1411.52	1731.74	1708.03
ENSG00000157020	SEC13	958.365	1020.44	856.91	881.306	740.347	956.191	887.39	960.521
ENSG00000140262	TCF12	1789.1	1568.59	1578.29	1620.91	1597.59	1474.98	1549.27	1432.93
ENSG00000136731	UGGT1	2427.7	2638.08	2135.91	2475.56	1931.23	2116.31	2270.55	2367.05
ENSG00000204472	AIF1	3.27247	3.42237	5.53202	10.3683	11.6897	12.1098	6.88567	5.70889
ENSG00000221955	SLC12A8	7.47992	0	2.76601	2.96237	7.30605	6.2971	17.2142	6.0657
ENSG00000135766	EGLN1	1186.03	1089.45	1597.09	1235.31	2628.23	1164.48	1270.41	1035.81
ENSG00000116584	ARHGEF2	1548.81	2140.69	2113.79	1886.04	2035.47	1954.04	2020.08	1886.43
ENSG00000062194	GPBP1	4524.42	5336.62	4051.65	3275.4	3906.3	4245.7	3231.1	2990.39
ENSG00000137710	RDX	956.495	1119.69	1135.17	878.343	869.907	707.213	865.872	913.423
ENSG00000172845	SP3	3537.53	3941.43	3182.57	2669.59	3183.98	2714.54	3215.61	2765.25
ENSG00000136603	SKIL	1694.67	1530.94	2412.51	595.437	1305.84	1632.89	1971.02	1586.36
ENSG00000105397	TYK2	3464.61	4218.07	3459.73	4255.94	3217.59	4473.85	3922.25	4388.71
ENSG00000112893	MAN2A1	2143.46	2124.72	1631.95	1661.4	1977.02	1723.95	1856.55	1551.39
ENSG00000159346	ADIPOR1	1430.53	1221.79	1154.53	1261.48	1224.98	1267.17	1214.46	1196.37
ENSG00000111269	CREBL2	1545.54	1431.69	1844.38	3008.29	2442.17	1581.06	1551	1614.19
ENSG00000184232	OAF	10.7524	35.3645	9.40444	34.561	9.7414	16.9537	6.88567	7.84973
ENSG00000133392	MYH11	1.40249	0	0	1.97491	0	1.93757	0	0.713612
ENSG00000166128	RAB8B	2172.92	2338.05	3162.66	3496.09	3399.26	2004.9	2545.11	2621.81
ENSG00000055070	SZRD1	1617.53	2457.26	2146.42	1530.07	1732.02	1741.88	1730.88	1816.5
ENSG00000150753	CCT5	949.95	1589.69	1521.86	940.553	916.179	1031.76	1140.44	1124.65
ENSG00000096696	DSP	186.998	2.28158	23.7877	6.41847	200.186	0.968785	110.171	28.5445
ENSG00000111276	CDKN1B	4481.41	3089.26	2924.78	4449.98	4694.38	2497.53	3272.41	4110.76
ENSG00000123143	PKN1	2618.91	2573.62	2927.55	2839.43	2750	2774.12	2489.17	2455.54
ENSG00000087303	NID2	38.3346	38.7869	20.4685	43.9418	31.1725	34.3919	20.657	23.5492
ENSG00000173757	STAT5B	8961.41	7205.8	7488.15	7304.72	7884.69	7270.25	8332.52	9107.83
ENSG00000162736	NCSTN	1479.62	1372.37	1298.37	1473.78	1302.43	1486.6	1267.82	1372.63
ENSG00000120875	DUSP4	12021.2	10435.4	9665	4693.38	9802.77	7314.81	13384	20161.7
ENSG00000120686	UFM1	2090.17	2204.01	1895.27	1784.34	1820.67	1848.93	1774.78	1538.55
ENSG00000119638	NEK9	2642.75	2574.19	2345.02	3029.52	2946.77	2482.51	2392.77	2509.06
ENSG00000141580	WDR45B	1383.79	1151.63	1198.24	1155.82	1497.25	1167.87	1167.12	1013.33
ENSG00000125503	PPP1R12C	1640.44	2167.5	1997.06	1882.09	1843.56	2205.44	1880.65	1993.47
ENSG00000178952	TUFM	1603.98	1900.56	1468.75	1449.59	1668.22	1342.25	1548.41	1706.25
ENSG00000151176	PLBD2	636.728	623.442	601.331	579.144	662.903	829.28	545.689	621.556
ENSG00000127947	PTPN12	455.34	770.604	347.964	196.01	437.876	613.241	482.857	356.806
ENSG00000134318	ROCK2	968.65	1150.49	1045.55	724.3	836.299	849.14	982.929	769.63
ENSG00000100811	YY1	3491.25	3873.55	3186.44	2607.38	3287.24	3075.41	3099.41	2733.85
ENSG00000088986	DYNLL1	673.66	1069.49	1138.49	923.766	1073.02	799.248	871.037	931.977
ENSG00000033867	SLC4A7	2820.86	2351.74	1854.33	3363.28	2316.02	2367.23	3064.98	3353.62
ENSG00000121741	ZMYM2	5439.77	3891.24	3038.19	3120.37	3626.24	3382.51	3749.24	3047.12
ENSG00000178982	EIF3K	1450.64	1455.65	1405.69	1880.12	1692.57	1134.93	1130.11	1248.46
ENSG00000211943	IGHV3-15	137.911	0	0	0	0	0	0.860708	25.69
ENSG00000089693	MLF2	1108.43	1335.29	1089.26	970.177	1099.8	1128.63	972.6	1095.75
ENSG00000108344	PSMD3	1327.69	1700.92	1482.58	1368.62	1384.25	1465.29	1413.28	1670.56
ENSG00000144579	CTDSP1	1327.22	1244.03	1567.22	1740.89	2167.95	1172.71	1513.12	1650.23
ENSG00000147862	NFIB	9.3499	0	0	3.94983	3.89656	2.42196	1.72142	2.85445
ENSG00000107816	LZTS2	436.173	456.886	529.415	615.186	664.364	621.476	594.749	528.786
ENSG00000241973	PI4KA	2562.34	2739.04	3027.68	2792.04	2505.49	3123.85	3261.22	3067.82
ENSG00000146223	RPL7L1	1395.94	1552.05	1440.54	1469.83	1341.88	1275.89	1313.44	1395.47
ENSG00000120451	SNX19	2149.54	1550.33	1522.97	1732.99	1590.28	1985.04	1631.9	1709.46
ENSG00000132294	EFR3A	2026.12	2367.14	2254.85	1889.5	1906.88	2026.7	2129.39	1646.66
ENSG00000129009	ISLR	0	0	0	1.48119	0	0	0.860708	0
ENSG00000146376	ARHGAP18	239.357	282.346	278.814	361.903	343.384	307.589	321.044	303.285
ENSG00000133835	HSD17B4	586.239	618.879	707.546	721.338	776.39	622.445	645.531	545.199
ENSG00000198618	PPIAP22	806.896	1076.34	1086.49	843.289	1093.47	617.601	954.525	1013.69
ENSG00000151491	EPS8	17.2973	1.71119	37.6178	10.3683	15.5862	6.2971	66.2745	7.84973
ENSG00000071626	DAZAP1	2220.13	2757.86	2813.03	2413.84	2118.76	2561.47	2654.42	2697.81
ENSG00000068650	ATP11A	1284.21	1257.15	1316.07	1245.68	1337.49	1242.95	2031.27	1949.59
ENSG00000100697	DICER1	2827.41	2332.92	2384.3	2204.5	2103.66	2124.06	2941.04	2634.65
ENSG00000153094	BCL2L11	2195.82	1793.32	2226.64	2704.65	4060.7	2829.34	2647.54	2333.15
ENSG00000047315	POLR2B	3144.37	3794.27	3266.66	2852.76	3213.69	2621.05	2846.36	2746.33
ENSG00000089820	ARHGAP4	3898.44	4976.13	5339.51	5666.52	4765.98	4301.89	5295.94	5079.84
ENSG00000138279	ANXA7	1897.56	2362.01	1926.8	1992.69	1831.38	1764.64	1873.76	1914.26
ENSG00000113575	PPP2CA	2009.29	2551.95	1858.76	1607.09	1764.17	1865.4	1619.85	1581.01
ENSG00000149212	SESN3	5794.6	6629.13	3925.52	3032.48	5932.03	5882.46	6780.66	4227.79
ENSG00000198604	BAZ1A	2053.24	3137.17	2554.13	1646.59	2064.2	2156.03	2353.18	1565.31
ENSG00000122515	ZMIZ2	3845.61	5738.74	5538.11	4804.97	4926.71	5543.39	4096.97	5174.04
ENSG00000173209	AHSA2P	2906.88	2012.35	2419.71	2789.57	2463.6	2897.64	2917.8	2696.38
ENSG00000163874	ZC3H12A	1361.35	1894.28	1816.16	1945.78	1455.37	1541.34	1128.39	1223.13
ENSG00000104415	CCN4	4.67495	5.13356	7.74483	3.4561	1.94828	0	1.72142	0
ENSG00000170323	FABP4	6.07744	0	8.85124	0	1.46121	3.39075	1.72142	0.356806
ENSG00000112851	ERBIN	3761.46	3762.33	3397.77	3747.4	3855.65	2943.17	3886.96	3119.2
ENSG00000086232	EIF2AK1	2903.61	2435.59	2087.79	2857.21	2859.1	2452.48	2248.17	2547.95
ENSG00000083168	KAT6A	5191.06	4617.92	4457.7	3815.53	4563.36	5010.07	4969.73	4614.21
ENSG00000105971	CAV2	6.07744	0	11.064	4.44356	13.1509	0.968785	11.1892	11.061
ENSG00000136938	ANP32B	2562.34	2563.36	2518.18	2453.83	3680.79	2366.26	2200.83	2558.3
ENSG00000106799	TGFBR1	1054.67	1827.55	2083.36	1197.29	1157.77	589.99	1875.48	1040.45
ENSG00000141543	EIF4A3	992.492	1169.31	1099.21	760.836	811.459	885.954	853.822	990.85
ENSG00000177239	MAN1B1	1612.86	1181.86	1345.94	1895.42	1581.52	1596.07	1685.27	1653.44
ENSG00000144711	IQSEC1	1851.28	1901.7	1800.67	1314.8	1959	1646.45	2070.86	1546.4
ENSG00000117758	STX12	759.212	779.73	900.613	516.44	632.704	645.695	788.409	610.138
ENSG00000005007	UPF1	2141.59	2457.83	2398.68	2325.46	2281.92	2527.56	2500.36	2858.37
ENSG00000176978	DPP7	2082.22	2168.64	2193.45	2837.95	2584.39	2524.65	2550.28	2501.57
ENSG00000112701	SENP6	2956.44	3095.53	2484.43	2596.03	2526.92	2305.22	2539.95	2106.22
ENSG00000105221	AKT2	3731.08	3503.37	3326.4	3407.22	3280.9	3818.47	3692.44	3773.58
ENSG00000091039	OSBPL8	2199.1	2334.06	2383.2	1825.31	2164.05	1795.64	2278.29	2087.31
ENSG00000104164	BLOC1S6	2551.59	2134.99	1496.41	1656.46	1662.86	1598.98	1730.88	1671.64
ENSG00000136003	ISCU	3385.6	3000.28	2042.98	2170.43	3135.76	2928.15	2167.26	2143.33
ENSG00000063245	EPN1	904.603	714.705	705.886	809.221	692.127	985.739	845.215	866.681
ENSG00000084207	GSTP1	359.036	435.211	440.902	150.094	388.195	412.218	452.732	389.989
ENSG00000162591	MEGF6	1265.98	1243.46	1264.62	2568.38	1090.55	1609.15	2315.3	1231.69
ENSG00000136810	TXN	714.8	1334.72	1937.31	718.869	1021.87	1526.32	886.529	1164.61
ENSG00000163788	SNRK	1082.25	1250.88	1547.86	1413.05	1672.6	1330.63	1452.01	1195.66
ENSG00000174238	PITPNA	1560.03	1499.57	1406.24	1670.78	1457.31	1279.28	1388.32	1512.14
ENSG00000058272	PPP1R12A	3235.07	2944.95	3149.93	3212.2	3094.36	2571.16	3100.27	3076.74
ENSG00000143543	JTB	1232.78	1195.55	1147.34	1220.5	1413.96	1364.05	1031.99	1235.98
ENSG00000126261	UBA2	1864.37	2421.9	2362.73	1645.6	2349.14	1809.69	1956.39	1697.33
ENSG00000171150	SOCS5	414.668	402.129	433.157	331.292	403.781	369.107	397.647	337.538
ENSG00000068912	ERLEC1	773.704	755.203	744.61	877.85	805.614	780.357	809.066	727.527
ENSG00000153310	FAM49B	2347.29	2598.15	2935.84	2411.37	2600.47	1815.02	2488.31	2210.41
ENSG00000141027	NCOR1	3500.6	3980.79	3669.94	3184.55	3422.64	3207.65	3863.72	3839.23
ENSG00000156639	ZFAND3	1130.87	1297.08	1044.45	1006.71	1114.9	932.94	958.829	937.329
ENSG00000184900	SUMO3	1057.94	1274.83	1065.47	964.746	1094.93	1150.92	1022.52	890.587
ENSG00000178252	WDR6	4525.35	4077.18	3975.86	4971.85	4011.51	3881.44	3913.64	4090.78
ENSG00000100911	PSME2	2142.53	3756.62	2573.5	2128.96	2136.78	2470.4	2128.53	2353.13
ENSG00000069329	VPS35	1669.42	1748.83	1997.61	1292.58	1530.37	1399.89	1779.94	1515
ENSG00000085719	CPNE3	1354.8	1282.25	1416.2	981.039	1611.72	999.786	1356.48	1465.04
ENSG00000136450	SRSF1	1637.17	1687.8	2067.32	1795.69	1778.78	1585.42	2008.89	2210.06
ENSG00000170242	USP47	3293.03	3111.51	3487.39	2280.04	2917.55	2107.11	2998.71	2668.55
ENSG00000100266	PACSIN2	652.156	686.756	943.763	614.198	793.924	574.005	773.777	756.428
ENSG00000117448	AKR1A1	458.145	686.756	687.63	607.78	599.583	623.413	610.242	641.18
ENSG00000077380	DYNC1I2	949.482	882.401	1265.73	881.306	1124.65	803.607	1167.12	1303.41
ENSG00000085449	WDFY1	2574.5	2515.44	1560.58	2345.7	1478.75	3080.74	2441.83	1600.27
[truncated: 49,780 more rows]

## Sheet: PM Tumors
ENSEMBLE_GENE_ID	GENE NAME	PM1	PM3	PM5	PM8	PM10	PM22	PM31	PM33
ENSG00000108821	COL1A1	55060.1	111876	152279	639552	1.38748e+06	411438	103561	607284
ENSG00000168542	COL3A1	35313	89975.7	134478	646778	1.25717e+06	350627	99761	468681
ENSG00000198804	MT-CO1	208456	270333	261863	553058	154108	295463	708758	208878
ENSG00000164692	COL1A2	36216	73762.1	106269	458328	754679	266573	58839.9	360367
ENSG00000211896	IGHG1	413355	342497	22072.9	9744.41	1933.86	233219	249310	75170.5
ENSG00000211592	IGKC	617489	247927	31426.4	13575	3829.9	226472	235170	90680.7
ENSG00000156508	EEF1A1	178677	122681	176008	147141	170476	161865	199934	194937
ENSG00000198886	MT-ND4	115024	138856	143570	215409	66306.1	148206	404677	126170
ENSG00000125730	C3	108143	175701	117763	50368.1	122311	134441	54355.8	122542
ENSG00000198938	MT-CO3	86287.2	96634.4	121734	216954	76710.6	126599	356294	147138
ENSG00000113140	SPARC	19781.2	60875.6	84673.4	217633	421476	121067	56962.5	164666
ENSG00000198727	MT-CYB	55440.9	63842.1	80952.9	153310	48071.2	92295.1	227773	86132.6
ENSG00000211897	IGHG3	106316	37381.2	7020.59	2504.01	160.024	90443.8	16598.8	7434.38
ENSG00000198712	MT-CO2	70231.2	90473	74140.8	165364	56687.2	86769.8	222230	97385.8
ENSG00000019582	CD74	40669.7	50102.3	46344.5	66261.8	58236.1	80741.3	61993.3	71059.5
ENSG00000210082	MT-RNR2	88971.1	73456.1	100906	164068	43980.4	80724.4	223227	73052.6
ENSG00000115414	FN1	3668	68612.1	32677.2	86746.1	398504	79589	50941.7	143710
ENSG00000106366	SERPINE1	1154.52	6930.45	7358.2	40313.6	55786.3	78827.5	5052.29	20907.1
ENSG00000075624	ACTB	67162.5	74127.3	59989.9	76798.9	105606	76823.7	88265.2	77726.6
ENSG00000091986	CCDC80	15353.5	11912.2	24504.6	41753.3	93324.9	75514.6	21834.7	57942.5
ENSG00000198888	MT-ND1	58548.7	39072	80475.2	124124	35842.4	74536	240977	49162.8
ENSG00000205542	TMSB4X	38576.2	44930.1	53734	64873.4	90709.3	71749.5	71990.5	55929.3
ENSG00000197746	PSAP	33869.9	43219.9	29435.3	72954.3	74948.4	71459.3	24233.4	54367.1
ENSG00000198763	MT-ND2	49152.2	42305.6	65353.6	114012	33183.1	66797.1	202223	57620.7
ENSG00000166710	B2M	53553.8	107899	45784.1	80021	67237.2	66001.7	55668.9	63337.3
ENSG00000245532	NEAT1	24243.9	15196.7	11315	10670	5138.22	65954	27131	16109.2
ENSG00000198786	MT-ND5	46486.4	49484.7	47160.7	148786	35846.3	64327.2	115012	48858
ENSG00000087086	FTL	32958.9	31586.8	56516.7	203287	113210	61918.8	53201.8	52820.8
ENSG00000184009	ACTG1	42537.8	50860.3	43682.5	56812.3	83553.8	60556.8	58511.9	60493.3
ENSG00000112096	SOD2	12077.3	9663.99	8759.28	18871	22101.7	59051.8	10848.5	23399.7
ENSG00000137801	THBS1	2965.47	13271.1	6958.14	30146	75572	58142	5058.15	31064.8
ENSG00000124942	AHNAK	23550.4	32133.2	34740.9	42077.3	28784.9	53862.1	18275.1	43873.9
ENSG00000198899	MT-ATP6	50409	35461.1	43358.4	78584.8	24400.2	52017.2	118008	47050.2
ENSG00000211677	IGLC2	122144	39429.7	2586.93	2747.65	502.378	51104.2	30713	15731.4
ENSG00000239951	IGKV3-20	33735.6	34896.3	3661.38	2213.74	364.66	49734.8	19668.3	16894.6
ENSG00000167658	EEF2	70136	31362.2	45425.4	37009.9	56713.4	48766.8	48142.7	75970.6
ENSG00000142173	COL6A2	14311.2	16943.9	24289.3	88543.7	81542.3	47256.5	18778.9	67463
ENSG00000134531	EMP1	5430.85	9040	21175.7	41957.3	11513	46777.7	10302.8	45589.6
ENSG00000011465	DCN	5994.08	34781.7	55327.5	69388.3	60586	46497.1	10704	56267
ENSG00000163359	COL6A3	7779.97	20911.5	18566	85428.8	60159.3	44691.3	17398.4	57874.7
ENSG00000142156	COL6A1	15250.3	17802.7	23844.5	83737.3	74454.7	41608.2	16698.4	71778.2
ENSG00000243466	IGKV1-5	49037	10727.1	2252.7	1281.15	221.124	41483.2	41131	9724.82
ENSG00000150991	UBC	19488.5	23050.7	21840.8	26273.4	55597.1	40089.5	21496.9	55444.6
ENSG00000143384	MCL1	9717.2	12891.2	19951	32533.4	40105.9	39083.3	16845.9	30761
ENSG00000164733	CTSB	20219.1	17829.5	12870.5	64255.5	57304.1	37895	18506.5	22689.5
ENSG00000100316	RPL3	39335.8	18625.4	41795.2	29522.3	46849.2	37118.7	37670.1	60311.2
ENSG00000182326	C1S	28248.6	40764.6	40285.3	28691.2	44006.6	36153.8	20315.6	48024
ENSG00000211662	IGLV3-21	69423.5	8957.73	978.224	401.014	256.038	34678.5	12252.4	3661.1
ENSG00000196924	FLNA	13608.7	23395.5	16856	26779.4	47665.8	32228.7	16924	33633.6
ENSG00000100345	MYH9	10664.3	17456	24302.8	23357.9	43190.9	31584.8	19555	37096.8
ENSG00000087245	MMP2	3412.44	9288.67	8930.62	43939	42032	31101.8	5290.5	26514.6
ENSG00000120129	DUSP1	10503.9	18818.6	19291.9	19330.3	74379.1	30441	17464.8	65581.1
ENSG00000231500	RPS18	39174.5	14955.4	30216.1	26463.4	43027	30047	46677.3	41910.5
ENSG00000130635	COL5A1	7080.45	10944.3	11176.6	39949.9	122017	29811.8	12677.1	37126.4
ENSG00000175899	A2M	5238.43	11240.1	26932	34552.5	30628.6	29379.7	22382.4	27075.6
ENSG00000137154	RPS6	37986.9	15854.9	35661.7	24169.3	29007	28157.5	34301.9	39413.7
ENSG00000108654	DDX5	18916.3	20593.5	19504.6	27449.7	19112.7	28029.4	18623.7	22771
ENSG00000128016	ZFP36	5613.25	13739.8	38301	25816.5	47075.1	27740.2	23065.8	48862.2
ENSG00000211893	IGHG2	98515.9	16792.3	6828.16	2105.32	958.203	27698.9	20058.8	22043.8
ENSG00000141753	IGFBP4	12852	10845.4	23858.9	20710.5	23924.1	27680.9	14057.6	24091.9
ENSG00000123384	LRP1	22684.5	16411.4	14377.1	26408.6	47527.1	27552.8	10207.1	41597.2
ENSG00000139329	LUM	3655.98	17292.4	22965.9	46999.1	19258.1	27395	7204.03	18713
ENSG00000187498	COL4A1	1445.15	8978.06	10025.3	21819.1	58079	27252	30890.7	26775
ENSG00000169908	TM4SF1	22889.9	18594.9	32918.6	15089.3	27742.3	26973.4	28998.7	39343.8
ENSG00000140988	RPS2	34734.8	16894.9	29636.2	23088.6	40236.8	26259.6	41160.3	47133.8
ENSG00000211598	IGKV4-1	26956.8	18387.8	2214.72	730.918	883.526	26232.1	38871.9	3470.58
ENSG00000089157	RPLP0	44370.8	17726.9	43945.8	24168.1	38219.5	26182.3	38109.4	55014.9
ENSG00000170345	FOS	12276.8	23800.4	45579.8	20559	103524	25804.2	31728.4	93841.1
ENSG00000160789	LMNA	5912.9	8075.82	13945	35754.4	18183.6	25382.6	9686.73	28020.8
ENSG00000186340	THBS2	1999.36	7873.37	7538.83	16470.7	58211.8	25305.3	8717.28	24570.3
ENSG00000105835	NAMPT	6509.2	4208	7623.23	12044.4	10082.5	25281	3735.28	15790.7
ENSG00000212907	MT-ND4L	8267.03	20614.8	18972	31605.5	10502.4	25098.8	44328.4	17572
ENSG00000070756	PABPC1	22057.1	12849.6	16328.5	17143.4	22241.4	24892.3	22024.1	29791.5
ENSG00000174444	RPL4	30757.1	18826.9	48175.2	24601.8	33706.8	24874.3	47550.1	37504.3
ENSG00000111640	GAPDH	16141.2	18196.5	11232.3	16719	38762.6	24358.5	16986.4	20848.9
ENSG00000101825	MXRA5	2094.57	8384.58	5268.4	18055	31916.5	24282.2	3960.8	15039.2
ENSG00000124491	F13A1	6511.2	8023.13	9779.71	8190.48	30251.3	24079.9	16859.5	5648.82
ENSG00000134333	LDHA	20432.6	17071.4	16730.2	12398.8	19200.9	23705	10544.9	16551.7
ENSG00000125148	MT2A	10231.3	2173.33	7525.32	9990.38	11387.9	23704	7910.86	14562.9
ENSG00000211673	IGLV3-1	14106.8	49281.4	1183.32	1030.51	127.049	23702.9	9793.15	4506.78
ENSG00000026025	VIM	3989.7	5605.74	15676.9	27577.9	25701.8	23630.9	21134.7	19794.7
ENSG00000163430	FSTL1	12449.2	17139.9	21158	32749.1	40412.3	23563.1	16053.1	23238.8
ENSG00000182718	ANXA2	25211	30285.2	39753.5	38790	42337.5	23249.6	22219.3	26162.2
ENSG00000130066	SAT1	7428.2	5720.37	7803.85	16545.3	16172.1	23219.9	10928.6	18891.8
ENSG00000167978	SRRM2	17391.9	15817	10874.4	11144.5	11856.3	23156.4	11826.8	14104.6
ENSG00000198840	MT-ND3	17975.2	15640.4	26575.8	48841	16752.1	23030.4	77517.3	23047.2
ENSG00000077942	FBLN1	6084.27	4608.28	12353.1	26550.9	29730.5	22701	3425.79	22711.7
ENSG00000137818	RPLP1	29997.4	16360.6	46182.5	21033.4	33574	22643.8	39215.5	36420.4
ENSG00000133112	TPT1	31262.2	11462.9	27287.3	19767.4	25279.9	22480.7	27733.4	31542.2
ENSG00000142871	CCN1	16296.6	10800.1	8745.78	21063.7	43798	22459.5	9592.03	61584.5
ENSG00000135486	HNRNPA1	19683.9	14639.3	24470	18961.9	19570.4	22175.7	25819.9	29349.1
ENSG00000166598	HSP90B1	21033.9	25750.9	20966.4	16674.7	27930.5	22150.2	17777.2	17331.7
ENSG00000204262	COL5A2	1489.25	7109.79	9139.94	30880.4	83442.3	21875.9	7648.24	27750.9
ENSG00000148303	RPL7A	29262.8	15050.6	22554	19267.3	27382.5	21240.5	29449.7	39771.4
ENSG00000102265	TIMP1	10219.3	6536.64	8271.44	14086.8	44081.2	21132.4	19037.6	25871.1
ENSG00000142534	RPS11	27196.3	13810.1	25921.7	21211.8	24564.1	21120.8	30817.5	41160.1
ENSG00000187514	PTMA	16249.4	18028.2	24425.2	24521.3	22259.8	20809.4	31416.9	28767
ENSG00000251562	MALAT1	4298.38	8814.44	10460	6211.06	3007.48	20637.8	11213.6	6118.76
ENSG00000251562	MALAT1	4298.38	8814.44	10460	6211.06	3007.48	20637.8	11213.6	6118.76
ENSG00000110321	EIF4G2	15751.4	18751.1	18097.6	20050.7	21295.8	20543.6	16036.5	21309.3
ENSG00000159403	C1R	29118.5	11395.4	17665.4	14799.1	27035.3	20530.9	8473.2	24296.2
ENSG00000115380	EFEMP1	50614.4	22162.3	15451.6	9760.73	38360.1	20520.3	24216.8	24761.9
ENSG00000211679	IGLC3	48933.8	21425.5	2040.85	197.01	184.27	20230.1	30309.8	8039.8
ENSG00000167526	RPL13	35686.9	15518.4	28683.3	19488.8	24397.3	20218.4	29254.5	33496
ENSG00000134871	COL4A2	2349.12	6578.24	9436.19	18859.3	39785.8	19968.5	25412.8	20063.5
ENSG00000204287	HLA-DRA	5659.35	9880.31	12421.5	13596	17100.2	19733.4	13387.8	15953.7
ENSG00000118515	SGK1	4614.07	13554.9	12871.4	19868.9	22857.2	19728.1	6339.04	18053.6
ENSG00000147604	RPL7	28441	12455.8	23442.8	16617.6	16285.6	19682.5	25696.9	20619.2
ENSG00000152583	SPARCL1	4562.95	6683.63	22180.1	31665	6862.6	19670.9	10433.6	23212.3
ENSG00000211892	IGHG4	187488	4125.73	326.637	1045.67	1162.84	19570.2	50779.7	18198.6
ENSG00000182492	BGN	7832.09	13514.2	23540.7	27566.2	37361.2	19434.7	28300.6	32869.4
ENSG00000125740	FOSB	1802.93	9106.56	18291.7	29359.1	47927.6	19409.3	9144.89	56867.1
ENSG00000122566	HNRNPA2B1	17368.9	15579.4	19171.2	16928.9	16909.2	19249.3	20948.2	18719.3
ENSG00000211966	IGHV5-51	6484.15	10382.3	289.5	602.687	122.2	19245.1	4291.76	3406.02
ENSG00000149273	RPS3	25250.1	13978.3	26898.2	17138.7	25042.3	19241.9	34201.3	35178.9
ENSG00000167460	TPM4	14605.9	14721.5	16251.7	21215.3	28214.6	19213.3	21686.3	25022.3
ENSG00000178209	PLEC	15761.4	8611.06	10457.5	11313.5	16308.9	19164.6	7652.15	16950.7
ENSG00000067082	KLF6	3335.28	10488.6	10712.4	21104.5	47813.2	19131.8	7522.3	38788.1
ENSG00000142541	RPL13A	33510.1	10466.4	24576.3	18086.4	25709.5	18962.3	28435.4	38541.5
ENSG00000067225	PKM	15647.1	18381.4	11660.2	20869.1	28403.7	18707.1	10331.1	11834.3
ENSG00000135821	GLUL	5603.22	8054.56	9307.9	14680.1	13248	18668.9	10558.6	15184.2
ENSG00000122862	SRGN	2580.63	4369.78	4606.68	10358.8	8465.75	18503.7	5131.37	14630.6
ENSG00000000971	CFH	2163.72	7804.96	19140.8	8410.81	26058.7	18455	11110.2	18308.7
ENSG00000100979	PLTP	6736.7	7878.92	7582.71	3976.34	52236.6	18408.4	4971.26	6428.88
ENSG00000074800	ENO1	20063.8	18763.2	11869.5	16832.1	22373.3	18338.5	8975.99	13311.8
ENSG00000161016	RPL8	32751.4	11700.5	22042.5	16636.3	20476.3	18262.2	20482.5	34118.4
ENSG00000059804	SLC2A3	840.834	5015.96	8625.08	15024	13981.2	18106.6	6002.22	28394.4
ENSG00000147065	MSN	10375.6	12110	11655.1	16364.6	18635.5	18000.6	15174.4	16962.3
ENSG00000142798	HSPG2	3461.55	7735.63	8252.87	18872.1	29126.3	17839.7	9675.99	19860.3
ENSG00000167996	FTH1	3968.66	7667.22	8068.03	25930.7	14705.7	17835.4	6675.86	11728.4
ENSG00000177954	RPS27	20696.1	14272.3	22747.3	17277.4	19108.8	17796.2	25427.4	33973.4
ENSG00000198034	RPS4X	22085.2	19602.5	21685.5	15802.8	20684.8	17600.3	29660.6	27759.3
ENSG00000131016	AKAP12	1048.29	1546.57	3603.98	4500.92	5385.53	17506	1646.02	21495.6
ENSG00000138326	RPS24	24008.4	12658.2	20088.6	16801.8	18164.2	17319.6	31302.7	20641.4
ENSG00000211949	IGHV3-23	15079.9	35261.5	948.683	986.215	339.445	17306.9	20462	6491.33
ENSG00000142192	APP	17551.3	27922.4	15113.9	17749.5	22657.4	17131.1	14389.5	22703.2
ENSG00000034510	TMSB10	10523	16311.6	18101.8	25062.2	25427.3	17097.2	28396.3	15985.4
ENSG00000096384	HSP90AB1	12882.1	15761.5	15727.5	19199.7	21033.9	17084.5	14376.8	22428
ENSG00000100201	DDX17	9082.81	10966.5	12233.3	12434.9	7775.22	17000.8	9999.14	14992.6
ENSG00000112936	C7	11415.9	6373.94	13542.4	27157.1	12304.4	16976.5	6722.72	33794.5
ENSG00000122406	RPL5	21501.9	9389.43	19468.3	15693.2	18238.8	16825	20819.3	21015
ENSG00000150093	ITGB1	8543.64	16541.7	11418	17394	35326.5	16785.8	12704.4	18063.1
ENSG00000185650	ZFP36L1	14782.2	16245.9	14374.6	11564.1	21030	16749.8	8288.69	35146.1
ENSG00000196126	HLA-DRB1	6399.96	1256.3	5655.81	1560.92	3119.98	16730.8	980.193	1941.15
ENSG00000135046	ANXA1	5737.52	4480.71	8623.4	22192.2	12177.3	16515.8	5099.15	10265.7
ENSG00000038427	VCAN	1807.94	8319.87	7830.86	18200.7	28208.8	16485.1	5111.84	22102.1
ENSG00000177575	CD163	3760.2	3724.53	1770.76	9702.44	21061.1	16469.2	4686.18	6214.02
ENSG00000204628	RACK1	20317.3	11502.7	16937	14970.4	18604.5	16416.2	23167.3	24447.5
ENSG00000118523	CCN2	3173.92	9539.19	8068.87	14169.6	31934.9	16167.3	6023.7	19423.2
ENSG00000084234	APLP2	22025	17884.9	10452.4	17413.8	24152.9	16132.4	11818.9	13845.3
ENSG00000106624	AEBP1	3382.38	8488.12	14596.6	15809.7	19742.1	16013.8	7372.93	15462.5
ENSG00000166441	RPL27A	17935.1	11817.9	21948.9	15842.4	22321.9	16001	26731.7	26687.2
ENSG00000197956	S100A6	12773.9	6545.89	6745.44	15524.1	21423.8	15991.5	11805.3	8341.46
ENSG00000136156	ITM2B	12044.3	14961.9	16148.7	19372.2	17613.3	15985.2	12964.1	20318.6
ENSG00000104419	NDRG1	11746.6	6746.49	6006.08	10044	3777.53	15916.3	4819.93	17273.5
ENSG00000100234	TIMP3	4060.86	20902.3	28481.6	13663.6	10880.7	15825.2	12339.3	21392.9
ENSG00000211895	IGHA1	122193	9858.12	2662.9	2234.72	559.599	15591.2	15622.6	15863.7
ENSG00000108298	RPL19	20369.4	11632.1	18538.1	16511.5	18788.7	15555.2	24367.2	23074.7
ENSG00000134107	BHLHE40	2021.41	8671.15	9358.54	15138.3	30914.7	15555.2	5217.28	23056.8
ENSG00000127022	CANX	12473.2	16439.1	14943.5	12094.5	16519.3	15530.8	10318.4	11445.8
ENSG00000211459	MT-RNR1	7985.42	9627.01	15396.7	32680.3	9675.14	15494.8	35195.2	27306.3
ENSG00000035862	TIMP2	8774.14	18382.3	13885.9	19175.2	19503.5	15481	9821.46	16063.7
ENSG00000122026	RPL21	12329.9	8195.07	16283.8	13952.7	16254.5	15428.1	15003.6	20820.3
ENSG00000157227	MMP14	15250.3	16058.3	11507.4	17867.3	29516.2	15358.2	7928.44	24436.9
ENSG00000152518	ZFP36L2	3743.17	3519.3	8586.26	8258.09	9061.23	15312.6	6600.68	15713.4
ENSG00000080824	HSP90AA1	15087.9	18175.2	12078.8	24886.2	15763.8	15303.1	14947.9	21288.1
ENSG00000115677	HDLBP	9552.84	11982.5	8667.29	13738.2	22160.9	14898.5	8771.95	13979.7
ENSG00000147403	RPL10	19891.4	10292.6	18326.3	15394.7	18139.9	14886.9	22091.4	25582.2
ENSG00000169045	HNRNPH1	10284.4	7428.72	8115.29	7580.8	4999.53	14856.1	10582	7889.51
ENSG00000122786	CALD1	5646.32	17930.2	16689.7	12199.5	21197.8	14844.5	12788.4	14811.6
ENSG00000110799	VWF	1471.21	4229.27	13862.3	9534.58	12322.8	14830.7	6366.37	11861.8
ENSG00000116016	EPAS1	4719.3	4456.68	15515.7	12570.2	20332.7	14782	8908.63	20341.9
ENSG00000163682	RPL9	13367.2	9675.08	16796.9	15594.1	17770.4	14707.9	14548.6	22634.4
ENSG00000092820	EZR	9303.3	11540.6	6097.23	6573.6	9125.24	14692	8246.71	12074.5
ENSG00000112306	RPS12	12177.6	7014.57	18970.3	13614.7	19518.1	14641.1	21539.8	28291.7
ENSG00000137076	TLN1	8898.41	8488.12	8262.15	11381.1	19269.8	14498.2	7977.25	15370.5
ENSG00000075426	FOSL2	6781.79	4292.13	10698	16179.3	14418.6	14442	5243.64	26921.1
ENSG00000177606	JUN	3364.34	10110.5	19507.1	13084.3	76828.9	14282.1	7855.21	46775
ENSG00000164924	YWHAZ	11647.4	13426.4	13019.1	16728.4	14361.4	14267.3	12096.2	15736.7
ENSG00000133110	POSTN	515.124	8359.62	5216.07	62677.1	42362.7	14262	7534.99	9214.66
ENSG00000044574	HSPA5	10957.9	15921.5	12274.6	13636.8	30727.5	14241.9	11466.5	23822
ENSG00000134954	ETS1	2412.26	3795.71	5498.82	7978.32	5749.22	14203.7	5441.83	13051.5
ENSG00000149131	SERPING1	17455.1	21088.1	19300.3	12943.2	15122.7	14084.1	6896.5	16340
ENSG00000142676	RPL11	20580.9	10013.4	18003	14077.5	14798.8	14025.8	16249.3	19394.6
ENSG00000157514	TSC22D3	3651.97	2103.08	6229.74	3377.15	4956.86	13807.6	8267.21	11042.6
ENSG00000087460	GNAS	11650.4	10440.5	14325.6	19634.5	18534.6	13778	21782	14629.6
ENSG00000173812	EIF1	13367.2	9162.95	11959	15887.9	17896.5	13776.9	10989.1	17141.2
ENSG00000174748	RPL15	18903.2	11915	17752.4	15033.4	21243.4	13756.8	24377.9	25742
ENSG00000166147	FBN1	1542.36	9209.17	6715.06	17015.1	22601.2	13607.5	5295.39	11295.5
ENSG00000109971	HSPA8	10855.7	23037.7	14694.5	26426.1	37266.2	13596.9	13739.3	18233.5
ENSG00000211938	IGHV3-7	4781.43	5167.56	622.89	304.258	96.0143	13587.3	14802.5	1582.35
ENSG00000100644	HIF1A	2369.17	2927.67	3189.57	9837.67	10981.5	13573.6	4466.52	8040.86
ENSG00000197694	SPTAN1	12126.5	21306.3	6610.4	7352.31	13264.5	13560.9	6947.27	13582.8
ENSG00000118785	SPP1	2386.21	4862.5	710.668	76611.2	19254.3	13547.1	15496.6	3849.5
ENSG00000090104	RGS1	1869.08	5575.24	3237.68	8681.26	5559.13	13488.8	9179.06	8200.69
ENSG00000132475	H3F3B	8578.71	9118.58	13178.6	14911	17777.2	13398.8	12894.8	21147.4
ENSG00000140575	IQGAP1	7082.45	11854	11362.3	11411.4	11893.2	13394.6	5714.21	11577.1
ENSG00000231389	HLA-DPA1	3294.19	6765.9	7029.88	9759.57	9519.96	13371.3	8844.19	12576.2
ENSG00000143947	RPS27A	19317.1	9766.6	17279.7	12686.7	15315.7	13294	17618.1	18885.5
ENSG00000125691	RPL23	14915.5	9781.39	16117.5	13163.5	17812.1	13283.4	22218.4	18162.6
ENSG00000162511	LAPTM5	6787.81	5578.01	4929.95	16265.6	12575.9	13256.9	8397.05	10378.9
ENSG00000118181	RPS25	13600.7	12312.5	18063	12790.5	13831.9	13252.7	19226	21703
ENSG00000154734	ADAMTS1	1717.75	3164.32	19601.6	9575.38	18515.2	13249.5	7621.88	21048.9
ENSG00000113657	DPYSL3	864.887	3812.35	10514	12309	14812.4	13237.8	7703.89	11151.6
ENSG00000185215	TNFAIP2	11591.3	4693.33	4334.91	4307.4	3952.1	13211.3	3811.43	4964.02
ENSG00000187955	COL14A1	1604.5	5635.32	8780.38	28569.9	4174.2	13149.9	4071.12	17322.2
ENSG00000115594	IL1R1	3750.18	2698.41	5261.65	8720.89	11824.3	13143.6	3102.64	15341.9
ENSG00000008988	RPS20	19640.8	11193.9	20886.2	14047.2	16207	13059.9	23798	25701.8
ENSG00000197958	RPL12	20080.8	7945.48	14616	11528	17352.4	13013.3	19481.8	26290.2
ENSG00000169504	CLIC4	8123.72	6964.65	7895.85	9962.4	14932.6	12980.5	7159.12	11928.5
ENSG00000137573	SULF1	3906.52	30683.7	16226.4	10429.9	41435.5	12940.2	9600.82	39921.7
ENSG00000280411	IGHV1-69D	7713.83	6693.8	165.429	22.149	81.4667	12790.9	6234.58	256.139
ENSG00000135404	CD63	11446	9631.64	12170.8	23060.6	22372.3	12771.8	8961.35	14658.1
ENSG00000109046	WSB1	9517.76	7212.4	3222.48	4619.82	4589.29	12746.4	3731.37	3856.9
ENSG00000170421	KRT8	25847.4	23906.7	15418.6	3368.99	22289.9	12711.4	21286	18662.2
ENSG00000171223	JUNB	4920.73	7838.24	16071.1	18080.6	35522.4	12669.1	9623.27	32196.3
ENSG00000124212	PTGIS	2010.39	2955.4	13895.2	6577.1	16735.6	12669.1	8222.3	9451.74
ENSG00000139644	TMBIM6	10151.1	14820.5	13289.2	13654.3	14583.5	12627.8	7162.05	15382.1
ENSG00000010327	STAB1	9491.71	3380.64	3586.26	5655	9759.52	12460.4	5282.69	6941.16
ENSG00000089009	RPL6	19873.4	10466.4	17669.6	12827.8	13451.7	12454.1	21677.5	16439.5
ENSG00000168906	MAT2A	2665.82	3058.94	6317.52	7396.61	2905.65	12446.7	3754.8	7490.48
ENSG00000196531	NACA	10497.9	8377.18	13176.9	11536.2	10511.1	12379.9	17890.5	15027.5
ENSG00000158859	ADAMTS4	258.564	1342.27	6540.34	5506.95	3717.4	12350.3	4207.8	14480.3
ENSG00000185624	P4HB	15102.9	8733.09	9055.54	9441.32	27302	12348.2	5103.06	9827.49
ENSG00000125810	CD93	2143.68	2458.98	6176.57	8865.44	6952.79	12313.2	5088.41	10895.4
ENSG00000103196	CRISPLD2	1417.09	2609.67	4398.21	7513.19	4741.56	12259.2	2583.26	11804.6
ENSG00000158710	TAGLN2	5516.03	6177.04	8891.8	13970.2	15349.7	12224.3	8799.28	9926.98
ENSG00000009307	CSDE1	10152.1	7666.3	9628.63	12209.9	10995.1	12180.8	8524.95	10970.6
ENSG00000168028	RPSA	23782.9	7983.38	16673.7	11235.4	19570.4	12114.1	21447.1	29795.8
ENSG00000144713	RPL32	16629.3	7600.66	14870	11332.1	18365.9	12097.2	20989.2	23220.8
ENSG00000177469	CAVIN1	12224.7	11504.5	17997.1	14654.5	21544.1	12087.6	8780.73	18566.9
ENSG00000143878	RHOB	5669.37	6619.84	19204.9	5052.31	31870	12085.5	10075.3	29780.9
ENSG00000142089	IFITM3	22466	7855.81	13870.7	10267.8	17092.5	12072.8	13139.9	15498.5
ENSG00000112715	VEGFA	4078.9	4297.67	2764.18	4418.15	6741.37	12055.9	1928.17	8670.63
ENSG00000145592	RPL37	19262	8239.44	16973.3	11013.9	17787.9	12017.7	24603.4	19839.1
ENSG00000149925	ALDOA	16010.9	12467.8	8756.75	12409.3	15441.8	11973.2	5592.18	9883.58
ENSG00000129538	RNASE1	6115.34	5033.52	8587.95	5643.34	19794.5	11946.8	4691.06	6445.81
ENSG00000152952	PLOD2	4221.21	13181.4	4781.4	3694.23	19199	11937.2	4813.1	8788.11
ENSG00000138821	SLC39A8	42375.4	12575	2767.56	1390.73	6530.91	11931.9	1237.93	2078.75
ENSG00000107562	CXCL12	5710.46	4920.74	14893.7	8880.6	12624.4	11884.3	4590.51	19718.5
ENSG00000071082	RPL31	17474.1	7222.57	12730.4	11072.2	15798.7	11846.2	19833.3	19410.5
ENSG00000108107	RPL28	16493	6920.28	13442.8	10933.5	15232.3	11838.7	17625.9	18800.8
ENSG00000184557	SOCS3	3510.66	6234.36	25176.4	19898	39587	11833.4	9938.61	21115.6
ENSG00000124145	SDC4	3541.73	5062.18	3469.78	2315.16	4356.53	11761.4	1513.25	6498.74
ENSG00000142937	RPS8	20182	8323.57	15043	11308.8	14448.7	11723.3	15968.2	20857.3
ENSG00000164587	RPS14	18820.1	7267.87	12761.6	10231.7	14269.3	11704.2	16311.8	18133
ENSG00000197756	RPL37A	17694.6	7919.59	11736.2	11073.4	15244	11661.9	17932.5	17605.9
ENSG00000177600	RPLP2	15064.9	7914.97	14418.5	11153.8	14520.5	11584.6	18218.5	17820.7
ENSG00000211663	IGLV3-19	7539.45	16092.5	963.032	3112.52	112.502	11401.3	6526.49	6534.72
ENSG00000116285	ERRFI1	2013.39	1316.39	2743.92	6613.24	4799.75	11380.1	1276.98	8360.51
ENSG00000261371	PECAM1	3765.21	4946.62	16446.7	11201.6	7543.43	11377	8526.9	8751.07
ENSG00000214548	MEG3	914.996	6955.41	1048.28	3112.52	2910.49	11313.4	3820.22	2407.92
ENSG00000085063	CD59	3917.55	7992.62	10526.7	12002.4	7925.54	11291.2	6056.89	7592.09
ENSG00000197747	S100A10	17718.7	24230.2	10964.7	11725	13076.4	11271.1	17629.8	11794
ENSG00000173372	C1QA	9240.16	5553.05	6076.97	9555.56	18048.8	11249.9	7855.21	10087.9
ENSG00000115524	SF3B1	7369.08	7594.19	7362.42	9092.76	6849.02	11230.8	8491.75	8768
ENSG00000179218	CALR	14144.9	17743.5	13668.1	14506.5	24465.2	11227.6	9855.63	11172.7
ENSG00000165119	HNRNPK	9884.56	8811.67	10505.6	11927.8	12418.8	11223.4	8720.2	13526.7
ENSG00000105193	RPS16	17251.6	7091.3	13733.1	10990.6	13056	11221.3	17326.2	21884
ENSG00000149257	SERPINH1	5181.3	7472.17	15249	12910.6	37521.2	11195.9	8373.62	16751.7
ENSG00000153187	HNRNPU	7313.96	9837.78	8809.08	11107.2	10942.7	11159.8	9325.5	12742.4
ENSG00000163453	IGFBP7	3755.19	4545.42	12251.9	12327.7	15597	11124.9	12247.5	13795.5
ENSG00000100097	LGALS1	3491.62	3448.12	6571.57	14475	25473.9	11046.5	8782.69	11703
ENSG00000215301	DDX3X	1529.34	9421.79	7657.83	12122.5	8514.24	10983	5972.93	8039.8
ENSG00000181163	NPM1	11826.8	8378.11	11243.2	11248.2	13235.4	10981.9	16519.8	11280.7
ENSG00000111799	COL12A1	8355.23	6556.98	3912.05	18467.6	17310.7	10933.2	4666.66	9790.44
ENSG00000188846	RPL14	14726.1	5407.91	12511.8	9343.4	11664.3	10905.7	18813.1	15538.8
ENSG00000204592	HLA-E	9319.33	12619.4	7622.38	10259.7	8168.98	10865.4	6110.59	12101
ENSG00000173369	C1QB	9698.16	4639.71	4036.12	6747.3	15396.2	10830.5	6364.42	9080.24
ENSG00000170525	PFKFB3	1208.64	1749.95	2411.38	5208.52	3124.83	10808.2	1689.95	6815.21
ENSG00000026508	CD44	3276.15	3473.08	3488.35	10342.4	6850.96	10798.7	5266.1	8614.53
ENSG00000170889	RPS9	18875.2	5817.44	14604.2	12853.4	15939.3	10770.1	14185.5	23677
ENSG00000115053	NCL	11362.8	9834.09	10487	10696.8	11986.3	10621.8	9582.27	12428
ENSG00000198695	MT-ND6	24637.7	7658.9	9974.68	29560.8	6820.9	10619.7	21118.1	6455.34
ENSG00000164111	ANXA5	6585.37	6800.11	10393.3	15270	13552.6	10532.9	9277.67	11378.1
ENSG00000067560	RHOA	6306.76	7464.77	8321.24	14030.8	17383.4	10485.2	10132.9	12912.8
ENSG00000196262	PPIA	11254.6	12738.6	14599.1	12816.1	17325.2	10476.7	14665.8	13453.7
ENSG00000013588	GPRC5A	4060.86	4222.8	2607.19	3781.66	5911.18	10457.7	1011.43	12487.3
ENSG00000145425	RPS3A	10258.4	7976.91	12183.5	9812.02	10629.5	10402.6	11406.9	14814.8
ENSG00000171863	RPS7	12365	8317.1	15126.6	12225.1	13073.5	10386.7	19299.3	16839.6
ENSG00000265972	TXNIP	15803.5	13022.4	20398.4	4851.8	11028.1	10381.4	12752.3	12389.9
ENSG00000105372	RPS19	23006.2	8917.98	14321.4	10762.1	16656.1	10268.1	17590.8	23946.9
ENSG00000135862	LAMC1	5319.6	9772.15	8331.36	11967.5	17467.8	10223.6	7711.7	13320.3
ENSG00000163513	TGFBR2	3367.35	3215.17	8231.77	8560.02	11309.3	10218.3	5369.58	10521.8
ENSG00000260032	NORAD	7906.25	8537.11	11510	11002.2	9680.96	10193.9	7900.12	9095.06
ENSG00000127603	MACF1	3714.1	7398.21	5833.9	7636.75	7731.58	10177	5044.48	9288.75
ENSG00000091136	LAMB1	7720.84	3392.66	17380.1	10664.2	15107.2	10170.6	9272.78	23620.9
ENSG00000131469	RPL27	15034.8	6592.11	11614.6	9928.6	15098.5	10062.6	13042.2	16059.5
ENSG00000125844	RRBP1	8236.97	7389.89	8625.93	7710.2	12641.9	10027.7	5157.73	9439.04
ENSG00000138119	MYOF	4659.16	4681.31	4366.98	6127.12	8218.44	10018.1	4294.69	7368.76
ENSG00000100219	XBP1	16374.7	8598.12	2879.81	3709.38	4558.26	10011.8	6672.93	4382.94
ENSG00000173706	HEG1	8824.25	6626.31	9401.59	7084.19	16818	9995.89	11070.1	12691.6
ENSG00000116251	RPL22	12871.1	8391.05	13077.3	9564.89	12068.7	9990.59	12263.2	14970.4
ENSG00000101439	CST3	8338.19	6702.12	11522.6	19685.8	14023.9	9925.99	7120.07	11929.5
ENSG00000134352	IL6ST	6973.21	5670.45	9712.19	7948.01	4950.07	9891.04	7689.24	8175.28
ENSG00000115306	SPTBN1	6668.55	8867.13	8855.5	11554.8	9249.38	9871.97	7937.22	14048.5
ENSG00000132386	SERPINF1	2722.94	3742.09	8293.38	13161.2	13548.7	9856.08	4114.08	11904.1
ENSG00000224373	IGHV4-59	8371.26	12535.3	840.648	937.254	512.076	9802.07	2777.54	2190.94
ENSG00000241351	IGKV3-11	16053	39468.5	1547.94	1098.13	153.235	9784.07	10738.2	4865.58
ENSG00000211666	IGLV2-14	18726.9	16163.7	2694.97	318.247	159.054	9766.06	7797.61	2403.69
ENSG00000168610	STAT3	5912.9	7819.75	6236.5	8174.16	8409.5	9736.41	4680.32	9106.7
ENSG00000162244	RPL29	12475.2	6012.49	10336.8	9918.11	15006.4	9735.35	13580.2	18043
ENSG00000142949	PTPRF	16349.7	26377.7	10045.6	3823.62	8801.31	9720.52	3729.42	9884.64
ENSG00000101096	NFATC2	505.102	916.11	720.797	6226.21	734.17	9686.63	937.237	2737.09
ENSG00000123358	NR4A1	2399.23	6360.08	7319.38	19197.4	9956.39	9663.33	8414.63	39711.1
ENSG00000102144	PGK1	5639.3	10802.9	4794.9	7691.54	11927.1	9655.91	6098.87	7058.64
ENSG00000130522	JUND	4219.2	4979.9	8284.1	10752.8	8825.56	9631.55	6142.8	18551
ENSG00000178878	APOLD1	398.87	1451.35	5849.93	2209.08	2109.41	9610.37	4521.19	10594.8
ENSG00000075223	SEMA3C	6696.61	22867.6	13572.8	5327.43	7739.34	9584.95	4273.21	19327.9
ENSG00000198755	RPL10A	14458.5	7095.92	10926.7	9552.06	11854.4	9576.48	11642.2	18376.4
ENSG00000211941	IGHV3-11	8754.1	4571.31	342.674	1304.46	67.8889	9566.95	10679.6	1703.01
ENSG00000051108	HERPUD1	6685.58	6190.91	3111.07	3644.1	5323.46	9536.23	4134.58	5645.64
ENSG00000170776	AKAP13	2825.16	3311.31	4910.53	7337.16	3610.72	9477.98	3426.77	6432.06
ENSG00000062716	VMP1	4090.92	3554.43	5108.04	5786.73	3317.83	9467.39	11289.8	4191.37
ENSG00000159189	C1QC	10142.1	3794.78	3300.14	5855.51	12678.7	9452.56	5375.44	6978.2
ENSG00000147162	OGT	10235.3	5924.67	4252.19	4198.99	1599.27	9380.54	8331.64	3345.68
ENSG00000120738	EGR1	4395.59	10596.7	23799	18151.7	50640.3	9377.37	9992.31	39206.2
ENSG00000167004	PDIA3	7480.32	16094.3	8007.26	9588.2	18069.1	9350.89	8513.23	8905.6
ENSG00000120708	TGFBI	10268.4	10361.9	4437.88	10093	24920.1	9344.53	7689.24	10029.6
ENSG00000092199	HNRNPC	10025.9	8690.57	9709.66	10595.4	12329.6	9311.7	9609.6	12964.7
ENSG00000182871	COL18A1	3924.56	4944.78	6824.78	8596.16	10128.1	9307.47	8935.96	9989.43
ENSG00000168385	SEPTIN2	7422.19	8942.93	9213.37	9863.32	11973.7	9290.52	9752.14	9407.29
ENSG00000149591	TAGLN	4190.14	5712.98	7701.72	9176.7	29064.2	9279.93	9241.54	12224.8
ENSG00000168036	CTNNB1	3666	4791.32	7999.66	8767.52	9092.26	9265.1	6062.75	12006.8
ENSG00000086062	B4GALT1	3866.43	3449.97	4199.86	4984.7	7795.59	9254.51	2237.65	7803.78
ENSG00000183255	PTTG1IP	19189.9	14002.3	8692.61	6772.94	11776.8	9251.33	6323.42	7406.87
ENSG00000114353	GNAI2	6233.6	5340.43	7238.35	11470.9	14040.4	9229.09	7379.76	8990.27
ENSG00000170144	HNRNPA3	6804.85	6472.86	6947.16	8748.87	7570.58	9213.2	9452.42	9026.26
ENSG00000112769	LAMA4	4450.71	2006.94	4612.59	5885.82	11919.4	9206.85	4076.98	12620.7
ENSG00000161638	ITGA5	1398.05	2324.02	2988.69	6452.36	8596.68	9150.72	2960.11	4671.89
ENSG00000136235	GPNMB	2489.43	7035.84	14106.2	40563	11544	9147.54	3760.66	10188.4
ENSG00000196735	HLA-DQA1	1384.02	54.5414	4272.45	3382.97	5686.18	9079.76	20.502	3955.34
ENSG00000105640	RPL18A	15966.8	7213.33	12632.5	9265.29	12094.9	8993.97	14456.9	17692.6
ENSG00000141367	CLTC	6262.66	9842.41	6496.46	8643.95	10781.7	8933.6	6690.5	6782.39
ENSG00000211651	IGLV1-44	8262.02	5375.56	808.575	563.052	107.652	8926.19	4319.1	1917.87
ENSG00000134294	SLC38A2	3543.73	4544.5	6589.3	9684.96	11703.1	8903.94	4387.44	7280.91
ENSG00000137575	SDCBP	3276.15	4749.72	6638.25	12253.1	7267.02	8856.28	6036.39	8512.92
ENSG00000102854	MSLN	19710	21860	4279.2	995.541	4787.14	8853.11	3671.82	4326.85
ENSG00000161011	SQSTM1	3682.03	3643.18	3769.41	8712.73	8079.75	8824.51	2576.42	4840.18
ENSG00000196576	PLXNB2	7051.38	6944.32	6439.91	5365.9	11546	8819.22	3548.81	10891.2
ENSG00000166741	NNMT	16205.4	9492.97	6959.82	6652.87	16074.2	8818.16	8166.65	12261.9
ENSG00000211653	IGLV1-40	16551.1	21627	1032.24	456.97	74.6778	8758.85	6561.63	9616.86
ENSG00000124762	CDKN1A	2062.5	4269.02	6039.84	9125.4	11160.9	8746.14	3827.05	10045.5
ENSG00000211899	IGHM	7582.54	15890	2916.1	778.714	128.019	8698.48	13755.9	1914.69
ENSG00000174437	ATP2A2	4917.73	4868.05	6036.46	8687.09	8951.64	8691.06	4352.29	8196.45
ENSG00000065978	YBX1	10547	8534.34	7602.13	13157.7	11295.7	8691.06	7808.35	8422.95
ENSG00000071967	CYBRD1	13733	29930.3	12316.8	9526.42	8253.35	8672	7014.63	12224.8
ENSG00000211611	IGKV6-21	1241.71	67.4834	81.8704	22.149	0.969842	8658.23	96.6525	97.3752
ENSG00000133048	CHI3L1	23019.2	1544.72	534.267	20032.1	4428.3	8639.17	809.343	989.628
ENSG00000157557	ETS2	1557.4	1745.32	7680.62	7508.52	3136.47	8601.04	4252.71	7923.38
ENSG00000110700	RPS13	11010	6679.01	11833.2	8323.37	10997	8591.51	13457.2	12908.6
ENSG00000187109	NAP1L1	6251.64	6613.37	10804.4	8274.41	7497.84	8561.85	13095	13074.7
ENSG00000090339	ICAM1	2639.76	4739.55	2610.57	3301.37	5679.39	8526.9	1731.94	4454.92
ENSG00000140391	TSPAN3	26634.1	21257.3	24783.1	4982.37	10822.5	8522.66	6972.65	8798.7
ENSG00000119681	LTBP2	1275.78	4277.34	5960.5	7473.55	6424.23	8462.29	5278.79	12108.4
ENSG00000182578	CSF1R	4500.82	2990.53	2750.68	5431.18	8817.8	8426.29	3545.88	5658.35
ENSG00000089280	FUS	8725.03	7073.74	9367.83	6479.18	6206.02	8414.63	6257.03	6929.52
ENSG00000140937	CDH11	4747.36	5455.99	5345.21	4776.03	10188.2	8414.63	3515.61	8574.31
ENSG00000197102	DYNC1H1	9131.92	8110.95	3742.4	6535.13	8849.8	8404.04	4072.1	7534.94
ENSG00000100600	LGMN	3694.06	2691.02	3998.14	6087.49	12218.1	8386.04	2973.77	4864.53
ENSG00000063177	RPL18	11898	5615.91	11296.4	7952.67	9197.01	8348.97	15612.8	16667
ENSG00000233927	RPS28	13399.2	5855.34	10586.6	8013.29	10870	8343.67	11180.5	17139.1
ENSG00000138061	CYP1B1	3562.77	1960.72	3918.8	3767.67	5415.59	8337.32	1983.82	5033.87
ENSG00000152795	HNRNPDL	6068.24	4934.61	6039.84	6919.83	5132.4	8318.26	6212.12	7271.39
ENSG00000105974	CAV1	914.996	1439.34	5735.99	7650.74	4413.75	8315.08	2546.16	8413.43
ENSG00000188157	AGRN	20814.4	18123.4	7228.22	3217.44	7238.9	8311.9	3391.62	6466.98
ENSG00000118849	RARRES1	11703.5	884.679	5473.5	1740.45	13299.4	8310.84	915.758	7994.29
ENSG00000143549	TPM3	6600.4	5971.82	6768.23	10688.7	11124.1	8298.13	7748.8	8562.67
ENSG00000163399	ATP1A1	8847.3	4701.65	6259.28	7129.66	7280.6	8291.78	3914.92	8136.12
ENSG00000172270	BSG	20589.9	15621	13695.1	8002.8	10514.1	8263.18	6675.86	11836.4
ENSG00000162909	CAPN2	11462	6338.82	5440.58	6656.37	7748.06	8256.83	6874.04	6900.94
ENSG00000206503	HLA-A	7921.28	23247.6	3760.97	8512.22	1226.85	8226.11	1066.11	4080.23
ENSG00000108679	LGALS3BP	11318.7	15091.3	8906.99	7967.82	12761.2	8195.4	6505.01	11024.6
ENSG00000138071	ACTR2	4860.6	7400.06	5855	9582.37	10777.8	8193.28	8220.35	8056.74
ENSG00000128595	CALU	2817.15	6190.91	6124.24	9353.89	20958.3	8189.04	4062.33	8090.61
ENSG00000171345	KRT19	38143.2	38494.2	11421.3	5780.9	13004.6	8172.1	8004.59	11856.5
ENSG00000078369	GNB1	5910.89	7769.83	5999.32	9456.47	9727.51	8143.5	6134.99	7705.34
ENSG00000211660	IGLV2-23	17752.7	4814.43	1066.85	502.433	143.537	8127.62	7158.14	3615.58
ENSG00000163638	ADAMTS9	237.518	815.347	1352.13	3634.77	1612.85	8125.5	1746.58	6576
ENSG00000131459	GFPT2	9702.17	6220.49	3162.56	3338.68	5210.96	8099.02	1940.86	8126.6
ENSG00000114391	RPL24	10837.6	6416.47	10662.6	8266.25	11515.9	8096.9	16278.6	14481.4
ENSG00000100906	NFKBIA	3074.71	3929.75	7158.17	8197.48	14331.3	8074.66	6532.34	11742.2
ENSG00000111669	TPI1	6023.14	6697.49	5543.55	6354.44	10877.7	8072.54	5360.8	8058.86
ENSG00000100650	SRSF5	8585.73	5975.51	6667.79	6810.25	7009.04	8067.25	7207.93	6334.68
ENSG00000170458	CD14	5705.45	3360.3	3369.35	6030.37	12524.5	8023.82	4953.69	6009.74
ENSG00000124831	LRRFIP1	1897.14	2390.58	3082.38	5101.27	3814.39	8010.05	3106.55	3919.35
ENSG00000044115	CTNNA1	4689.23	9902.49	5643.99	6838.22	8413.38	7958.16	5846.99	7599.5
ENSG00000089597	GANAB	7051.38	8484.42	7776	6812.58	11903.8	7941.21	5817.7	9640.14
ENSG00000154553	PDLIM3	372.813	944.767	1117.49	3895.9	4586.38	7932.74	1484.93	3593.36
ENSG00000073921	PICALM	2430.3	4546.35	5513.17	7291.7	8272.75	7922.15	6321.47	6858.6
ENSG00000110955	ATP5F1B	8097.67	12943.9	7611.41	9619.68	10130	7910.5	6945.31	10971.6
ENSG00000211959	IGHV4-39	5958	5454.14	633.862	542.069	222.094	7910.5	54.6721	3099.07
ENSG00000170027	YWHAG	2942.42	5016.88	6054.19	8005.13	8603.46	7905.2	4365.96	7221.64
ENSG00000128272	ATF4	5780.61	3351.06	6649.22	7433.92	8355.18	7856.48	6671.95	8253.61
ENSG00000063046	EIF4B	8997.63	6069.81	8639.43	6108.47	8199.04	7843.77	8296.5	11420.4
ENSG00000147872	PLIN2	521.137	545.414	1415.43	2701.02	8442.47	7818.36	490.097	3421.89
ENSG00000109472	CPE	1405.07	1368.16	3219.11	5533.76	4740.59	7802.47	2307.94	6599.29
ENSG00000113083	LOX	1055.3	2904.56	4238.69	5673.65	19179.6	7797.17	5091.34	5547.21
ENSG00000107581	EIF3A	5382.74	3731	4829.51	6363.77	6055.69	7785.52	4728.16	5874.26
ENSG00000182899	RPL35A	10091	5781.38	9778.87	7537.67	10593.6	7775.99	10702.1	13483.3
ENSG00000159140	SON	6369.9	7124.58	5062.46	6814.91	6208.93	7770.7	5704.45	6495.56
ENSG00000152661	GJA1	1012.21	2813.96	7689.06	10040.5	11895.1	7679.61	3301.81	9070.71
ENSG00000136167	LCP1	3212.01	4708.12	3120.36	13430.5	5220.66	7678.55	4744.76	5637.18
ENSG00000173821	AC124319.1	6443.06	7796.64	3896.02	5109.43	4838.54	7677.49	5424.26	4509.95
ENSG00000130255	RPL36	15023.8	6057.79	9399.9	6855.71	10167.8	7665.84	12106.9	13910.9
ENSG00000131051	RBM39	6164.45	5151.85	5342.67	6106.14	5260.42	7661.61	5750.34	5177.82
ENSG00000213741	RPS29	9699.16	6026.36	9820.22	7390.78	10309.4	7657.37	10765.5	13523.5
ENSG00000101160	CTSZ	4909.71	5890.47	5688.72	17568.8	14851.2	7653.13	6087.16	6671.26
ENSG00000198918	RPL39	9142.95	4368.86	7349.76	6474.51	9033.1	7647.84	10623	11590.8
ENSG00000116560	SFPQ	7088.46	6680.85	6619.68	6600.41	5544.58	7635.13	6207.24	6125.11
ENSG00000145423	SFRP2	8068.6	12559.3	40981.6	49707.1	1386.87	7627.72	11000.8	22761.5
ENSG00000113721	PDGFRB	1918.18	3246.6	5744.43	9290.94	7871.23	7623.48	7128.86	9816.9
ENSG00000211945	IGHV1-18	5976.04	25416.3	553.68	599.19	112.502	7618.18	16806.8	2587.85
ENSG00000147526	TACC1	1496.26	2858.34	5577.31	4960.22	3113.19	7608.65	3246.16	6012.92
ENSG00000011028	AC080038.1	2331.09	10944.3	4529.03	11936	16215.8	7577.94	5636.11	12089.3
ENSG00000028137	TNFRSF1B	2077.53	1445.81	2441.76	3976.34	2824.18	7551.46	1787.58	5120.67
ENSG00000067167	TRAM1	9788.35	5881.22	7580.18	5390.38	8363.91	7538.75	3254.94	7827.06
ENSG00000156482	RPL30	8154.79	5078.82	8549.97	6208.72	8656.81	7505.92	9796.07	13124.5
ENSG00000120594	PLXDC2	3182.94	8969.74	4623.57	8035.44	5554.28	7492.15	3211.01	8971.22
ENSG00000131446	MGAT1	4259.29	3217.94	3691.76	6254.19	6882	7476.26	2841	4861.35
ENSG00000068697	LAPTM4A	6488.15	5349.68	8408.17	10799.4	12276.3	7469.91	5867.49	10849.9
ENSG00000058262	SEC61A1	11807.8	7348.29	7214.72	6110.8	12529.4	7468.85	5511.15	6408.77
ENSG00000106483	SFRP4	4272.32	6298.14	13218.3	30833.8	7024.56	7465.67	3054.81	12744.5
ENSG00000240382	IGKV1-17	3336.28	5544.73	416.948	131.728	16.4873	7464.61	3224.68	686.919
ENSG00000030582	GRN	6501.18	6522.78	5649.05	15805.1	11439.3	7462.49	5080.6	6669.14
ENSG00000244437	IGKV3-15	8295.1	7739.33	1493.08	432.489	137.717	7439.19	6958.98	3444.12
ENSG00000111897	SERINC1	2669.82	4678.54	6227.21	7723.02	5446.63	7433.9	4763.31	6070.07
ENSG00000109475	RPL34	10173.2	4637.86	8999.83	6741.47	9415.22	7431.78	10257.9	11490.3
ENSG00000118503	TNFAIP3	903.972	2450.66	2049.29	3519.37	8870.17	7406.36	3450.2	12432.3
ENSG00000091490	SEL1L3	3174.93	4060.1	995.949	1506.13	2390.66	7403.18	2153.69	2548.69
ENSG00000170348	TMED10	6852.95	8595.35	9196.49	6967.62	8306.69	7401.07	5277.81	8102.25
ENSG00000114867	EIF4G1	6115.34	6781.62	6096.39	7802.29	11515.9	7391.53	4143.37	9047.43
ENSG00000179820	MYADM	1499.27	3166.17	5132.51	10105.8	5172.16	7380.94	2366.52	7632.31
ENSG00000145741	BTF3	7813.04	5935.76	9626.94	7291.7	7679.21	7368.23	9030.66	9500.43
ENSG00000152291	TGOLN2	6109.33	6608.75	5895.51	6213.39	8199.04	7359.76	4450.9	7889.51
ENSG00000107372	ZFAND5	6060.22	3187.43	5378.12	7597.12	8078.78	7320.57	4925.37	10294.3
ENSG00000121966	CXCR4	2310.04	3892.77	3679.95	4824.99	1570.17	7306.81	5393.02	10502.8
ENSG00000211648	IGLV1-47	14921.6	944.767	410.196	153.878	107.652	7298.33	3948.11	2694.75
ENSG00000156976	EIF4A2	10957.9	5835	7456.95	5367.06	6458.17	7282.45	9025.78	7471.43
ENSG00000135047	CTSL	4189.14	3238.28	3488.35	9003	8600.55	7258.09	2850.76	6135.7
ENSG00000125868	DSTN	4301.38	6391.51	8032.58	7071.37	8611.22	7246.44	5648.8	6293.4
ENSG00000162692	VCAM1	860.878	1456.9	3367.66	4310.9	9347.33	7246.44	1488.84	5255.09
ENSG00000169604	ANTXR1	3626.91	14429.4	5958.81	10820.4	8883.75	7231.61	6147.69	11494.5
ENSG00000110651	CD81	7234.78	6389.66	10152.8	10143.1	10022.3	7219.96	6315.61	9652.85
ENSG00000072110	ACTN1	3974.67	4760.81	3805.71	7182.12	12700.1	7208.31	5061.08	6855.43
ENSG00000143761	ARF1	6958.18	7489.73	6967.42	9208.17	9558.76	7205.13	6552.85	7770.96
ENSG00000162434	JAK1	3488.61	3731	5340.14	5452.16	5885.97	7168.06	3665.96	6483.92
ENSG00000102024	PLS3	3275.14	6484.88	6999.49	5332.09	12757.3	7154.29	5530.67	8600.77
ENSG00000172037	LAMB2	3487.61	4335.58	3989.7	7792.96	9776.97	7142.64	4451.87	6979.26
ENSG00000148175	STOM	1768.86	2879.6	8531.4	7522.51	5311.82	7130.99	4851.18	8745.77
ENSG00000132465	JCHAIN	10700.3	22576.4	2059.42	1214.7	364.66	7129.93	10663	3329.81
ENSG00000221983	UBA52	12629.6	5587.25	7835.08	7329	8852.71	7088.63	9150.75	11706.2
ENSG00000081237	PTPRC	2409.26	3820.67	1900.74	5234.17	2105.53	7081.21	3268.61	4394.58
ENSG00000092841	MYL6	9678.11	6722.45	5939.4	7023.58	9747.88	7062.15	7286.04	6988.79
ENSG00000185896	LAMP1	5016.94	6556.06	6004.39	8640.46	9366.73	7062.15	5028.86	6993.02
ENSG00000128510	CPA4	3401.42	5248.91	4102.8	268.12	2477.95	7043.09	4509.47	1349.49
ENSG00000115310	RTN4	4430.67	6476.56	4753.54	8571.68	8872.11	7039.91	4539.74	7067.11
ENSG00000109332	UBE2D3	5244.44	5381.11	4708.81	7323.17	7882.87	7013.43	4084.79	5613.89
ENSG00000133800	LYVE1	2103.59	748.788	1304.02	1401.22	7971.13	6997.54	476.429	1476.5
ENSG00000108691	CCL2	2397.23	3232.73	7826.64	6926.82	6505.7	6965.77	3951.04	10151.4
ENSG00000130203	APOE	7098.49	6151.16	8997.3	42784.9	24858	6940.35	10548.8	15302.7
ENSG00000228253	MT-ATP8	2032.43	5096.38	5335.92	9844.66	2997.78	6912.82	14832.7	5612.83
ENSG00000131236	CAP1	5096.12	6407.22	5087.78	9419.17	10792.4	6902.22	6209.19	6029.85
ENSG00000240583	AQP1	13813.1	11216.1	23596.4	7724.19	17368.9	6884.22	9364.56	16386.6
ENSG00000270550	IGHV3-30	5285.53	5096.38	820.392	356.716	33.9445	6863.04	13595.8	2206.82
ENSG00000123342	MMP19	293.641	638.781	1080.35	4577.86	2003.69	6819.61	742.955	3745.77
ENSG00000185787	MORF4L1	5155.25	6341.59	11172.3	8758.2	9823.52	6817.5	6007.1	7151.78
ENSG00000117523	PRRC2C	2709.91	4755.27	3932.31	5306.44	4854.06	6796.31	5530.67	6794.04
ENSG00000102802	MEDAG	1103.41	854.173	2217.25	5461.49	2868.79	6770.9	722.453	7621.73
ENSG00000163466	ARPC2	6651.51	5409.76	5916.61	9014.66	9865.23	6755.01	7052.7	5799.12
ENSG00000133872	SARAF	5642.31	7807.73	4706.28	5498.79	3859	6747.59	4047.69	5257.2
ENSG00000243290	IGKV1-12	4613.06	4844.01	367.151	327.573	56.2508	6713.7	5345.18	2076.63
ENSG00000188042	ARL4C	1317.87	1516.99	1674.54	4807.51	3994.78	6684.05	1661.64	4429.51
ENSG00000257017	HP	2558.58	1049.23	659.183	110.745	673.07	6681.93	116.178	340.813
ENSG00000135048	CEMIP2	1077.35	1037.21	2700.03	6103.81	3250.91	6671.34	2441.7	6239.42
ENSG00000071127	WDR1	6040.18	5939.46	4343.35	6452.36	9173.73	6637.45	4237.09	6454.28
ENSG00000196562	SULF2	4334.46	3898.32	6445.81	4619.82	9226.1	6620.5	3111.43	8201.74
ENSG00000115461	IGFBP5	8694.97	38365.7	18765.2	15786.4	6013.02	6614.15	8997.47	13691.8
ENSG00000058668	ATP2B4	4396.59	5623.31	3588.79	5294.79	4984.02	6607.79	4314.22	4472.91
ENSG00000116741	RGS2	1298.83	2466.38	2723.67	6397.57	9454.02	6605.67	2959.13	9431.63
ENSG00000211973	IGHV1-69	5681.39	18.4886	7.59622	18.6518	35.8841	6599.32	1169.59	30.6944
ENSG00000171988	JMJD1C	1597.48	2339.73	2376.77	5530.26	1439.24	6598.26	2345.04	4971.43
ENSG00000077549	CAPZB	4437.68	4194.14	4300.3	6951.3	8039.02	6597.2	4902.92	6565.42
ENSG00000178726	THBD	466.017	2617.06	4761.99	5793.72	5823.9	6595.08	2661.36	7261.86
ENSG00000145685	LHFPL2	556.213	978.047	1483.79	4872.79	2830.97	6592.96	1256.48	1772.86
ENSG00000096060	FKBP5	3391.4	1110.24	2154.79	2295.34	2933.77	6587.67	2009.2	3149.88
ENSG00000079308	TNS1	2456.36	5916.35	5776.5	7150.64	6876.18	6581.31	4498.74	6777.1
ENSG00000161203	AP2M1	12404.1	6506.14	7652.77	6648.21	14019.1	6578.14	6693.43	10320.7
ENSG00000087074	PPP1R15A	1270.77	2902.71	5880.32	7888.55	15217.8	6574.96	3918.82	18381.7
ENSG00000060237	WNK1	2479.41	5949.63	4452.23	6162.1	4484.55	6549.54	6589.94	9259.11
ENSG00000119138	KLF9	1822.98	1721.29	4012.49	5544.25	6391.26	6548.48	2265.96	10645.6
ENSG00000163520	FBLN2	856.869	2120.64	6069.38	7864.07	8061.32	6541.07	3030.4	4588.28
ENSG00000060138	YBX3	5351.67	4081.36	5129.14	5335.59	4223.66	6534.71	3057.73	7307.37
ENSG00000106682	EIF4H	6644.5	5795.25	7825.79	6427.88	8261.11	6532.6	5421.33	7365.59
ENSG00000145623	OSMR	11165.4	7260.47	4457.29	3860.93	5830.69	6502.94	1848.11	5600.13
ENSG00000100292	HMOX1	840.834	977.122	1058.41	11486	8066.17	6502.94	1655.78	4477.14
ENSG00000234745	HLA-B	10327.5	28819.1	5627.95	5700.46	6910.12	6501.88	9329.41	6588.7
ENSG00000116679	IVNS1ABP	1918.18	4119.26	3448.68	6097.98	1840.76	6475.4	3844.62	6260.59
ENSG00000163131	CTSS	2446.34	3704.19	2651.92	18453.6	8269.84	6440.45	4460.66	4582.98
ENSG00000138080	EMILIN1	2181.76	2229.72	2904.29	6876.69	14582.5	6429.86	1868.62	10025.4
ENSG00000130402	ACTN4	4432.67	6870.36	6073.6	5193.37	8351.31	6420.33	4430.4	8594.42
ENSG00000151726	ACSL1	2071.52	1627	2177.58	3546.18	2265.55	6388.56	1069.04	2308.43
ENSG00000168209	DDIT4	1122.45	722.904	1421.34	812.52	3028.82	6379.02	1156.9	3186.92
ENSG00000047849	MAP4	2939.41	4875.44	5123.23	7270.71	9366.73	6367.37	5249.5	8869.61
ENSG00000115268	RPS15	13383.2	5118.57	8799.8	6623.73	7424.14	6336.66	11528	13076.9
ENSG00000198467	TPM2	5520.04	2815.81	3992.23	3846.94	16800.6	6325.01	5647.83	5902.84
[truncated: 51,273 more rows]
