# Supplementary material
Source: Research Square preprint supplement (doi:10.21203/rs.3.rs-9859684/v1)
Supplement: Supplementary file 2 [file f9828e13ec6674006079f6ea.xlsx]

## Sheet: Table S1
Supplementary Table S1. Differentially expressed genes between PM-Tregs and NSCLC-Tregs.
ENSEMBLE_GENE_ID	gene_name	gene_biotype	baseMean	log2FoldChange	pvalue	padj
ENSG00000153002	CPB1	protein_coding	53.4828	25.1204	6.33986e-21	5.77371e-17
ENSG00000273760	NA	LncRNA	13.6593	23.2782	2.27633e-15	3.10958e-12
ENSG00000188257	PLA2G2A	protein_coding	395.512	12.3051	7.53265e-15	7.91537e-12
ENSG00000100739	BDKRB1	protein_coding	260.287	10.9675	1.0112e-11	2.7906e-09
ENSG00000276850	NA	LncRNA	105.18	10.7519	1.1441e-09	1.17511e-07
ENSG00000130600	H19	protein_coding	92.0418	10.5431	7.03291e-12	2.1115e-09
ENSG00000173432	SAA1	protein_coding	1386.29	10.1184	1.96727e-12	7.07206e-10
ENSG00000128510	CPA4	protein_coding	420.863	10.0625	8.85132e-10	9.83037e-08
ENSG00000105509	HAS1	protein_coding	612.046	9.90973	1.98348e-13	1.20424e-10
ENSG00000172137	CALB2	protein_coding	233.93	9.8958	4.83405e-14	3.88444e-11
ENSG00000099864	PALM	protein_coding	116.576	9.80376	8.62504e-11	1.64787e-08
ENSG00000133800	LYVE1	protein_coding	65.7614	9.71502	3.53346e-09	3.03578e-07
ENSG00000115380	EFEMP1	protein_coding	2194.24	9.63409	1.96362e-16	3.83201e-13
ENSG00000077274	CAPN6	protein_coding	58.2991	9.52881	5.62596e-06	0.000117693
ENSG00000102854	MSLN	protein_coding	1930.04	9.51817	1.10793e-08	7.56742e-07
ENSG00000169594	BNC1	protein_coding	339.116	9.49617	1.29371e-10	2.26573e-08
ENSG00000114638	UPK1B	protein_coding	315.014	9.43772	1.68879e-10	2.79633e-08
ENSG00000184937	WT1	protein_coding	90.0067	9.42957	1.41248e-10	2.4119e-08
ENSG00000169218	RSPO1	protein_coding	41.9661	9.42927	9.89356e-06	0.000184129
ENSG00000224259	LINC01133	LncRNA	40.0796	9.35947	1.77019e-05	0.000299199
ENSG00000183783	KCTD8	protein_coding	35.6658	9.19058	1.55928e-05	0.000268776
ENSG00000179914	ITLN1	protein_coding	46.6202	9.16893	7.77208e-20	4.73121e-16
ENSG00000265190	ANXA8	protein_coding	756.961	9.09346	2.76247e-14	2.43463e-11
ENSG00000185615	PDIA2	protein_coding	232.894	9.07029	4.54722e-11	9.63059e-09
ENSG00000264230	ANXA8L1	protein_coding	331.433	9.06365	2.2622e-11	5.61869e-09
ENSG00000172935	MRGPRF	protein_coding	31.911	9.0304	4.48282e-08	2.29785e-06
ENSG00000206538	VGLL3	protein_coding	217.353	8.91051	3.31124e-11	7.73217e-09
ENSG00000150471	ADGRL3	protein_coding	80.8113	8.86355	0.000111168	0.00132252
ENSG00000172201	ID4	protein_coding	375.177	8.81805	5.72428e-10	7.04473e-08
ENSG00000088756	ARHGAP28	protein_coding	58.3772	8.80095	5.9854e-09	4.54242e-07
ENSG00000167191	GPRC5B	protein_coding	310.169	8.74305	7.12858e-13	3.14129e-10
ENSG00000250786	SNHG18	protein_coding	24.6352	8.64995	2.51436e-05	0.000398653
ENSG00000168490	PHYHIP	protein_coding	31.2854	8.59786	4.35188e-06	9.39978e-05
ENSG00000125730	C3	protein_coding	6736.24	8.59715	2.49617e-19	8.52474e-16
ENSG00000112936	C7	protein_coding	51.1755	8.59603	4.22983e-13	2.10115e-10
ENSG00000175745	NR2F1	protein_coding	48.5245	8.57554	7.75023e-07	2.29409e-05
ENSG00000205403	CFI	protein_coding	290.058	8.55708	7.47147e-13	3.24013e-10
ENSG00000164294	GPX8	protein_coding	138.557	8.53462	1.00827e-11	2.7906e-09
ENSG00000257894	SYT1-AS1	LncRNA	28.8975	8.50344	1.50501e-07	6.01145e-06
ENSG00000169418	NPR1	protein_coding	440.704	8.43077	3.14554e-12	1.07424e-09
ENSG00000139874	SSTR1	protein_coding	21.5203	8.40082	6.75073e-10	7.90306e-08
ENSG00000169946	ZFPM2	protein_coding	113.89	8.362	1.32703e-08	8.7023e-07
ENSG00000203783	PRR9	protein_coding	19.8054	8.35048	8.08277e-06	0.000157961
ENSG00000138759	FRAS1	protein_coding	363.59	8.34712	1.86058e-11	4.70674e-09
ENSG00000134533	RERG	protein_coding	88.5368	8.34271	6.52744e-07	1.97931e-05
ENSG00000257017	HP	protein_coding	76.8832	8.31524	6.54921e-14	5.11232e-11
ENSG00000064692	SNCAIP	protein_coding	24.711	8.28675	3.63626e-09	3.08528e-07
ENSG00000170558	CDH2	protein_coding	106.457	8.25405	2.89164e-10	4.24744e-08
ENSG00000101825	MXRA5	protein_coding	265.897	8.20848	1.89913e-10	3.07019e-08
ENSG00000232044	SILC1	protein_coding	18.3614	8.2004	8.77375e-05	0.00109306
ENSG00000141448	GATA6	protein_coding	178.224	8.13777	2.58989e-14	2.35861e-11
ENSG00000112902	SEMA5A	protein_coding	213.3	8.13332	5.80918e-11	1.19333e-08
ENSG00000124491	F13A1	protein_coding	219.206	8.12028	4.80986e-15	5.25641e-12
ENSG00000215808	LINC01139	LncRNA	17.1872	8.10586	8.3911e-05	0.00105842
ENSG00000237187	NR2F1-AS1	LncRNA	35.9328	8.0988	1.73713e-06	4.38633e-05
ENSG00000174348	PODN	protein_coding	28.364	8.09262	2.09212e-09	1.93272e-07
ENSG00000166741	NNMT	protein_coding	1003.21	8.09135	2.75614e-08	1.54621e-06
ENSG00000203722	RAET1G	protein_coding	21.6163	8.09133	1.77756e-05	0.000300153
ENSG00000080493	SLC4A4	protein_coding	227.75	8.08699	2.48354e-11	6.02604e-09
ENSG00000167244	IGF2	protein_coding	45.6051	8.0194	1.08804e-10	1.99506e-08
ENSG00000066735	KIF26A	protein_coding	20.7514	7.99312	8.42329e-09	6.05613e-07
ENSG00000261051	NA	LncRNA	19.1626	7.94414	0.000264477	0.00268716
ENSG00000121005	CRISPLD1	protein_coding	14.7575	7.91771	0.000145801	0.0016674
ENSG00000162878	PKDCC	protein_coding	44.4915	7.89223	1.35931e-11	3.60559e-09
ENSG00000128918	ALDH1A2	protein_coding	789.842	7.86921	2.4937e-17	5.2408e-14
ENSG00000112837	TBX18	protein_coding	83.4088	7.84059	2.04918e-08	1.2224e-06
ENSG00000139304	PTPRQ	protein_coding	13.8002	7.79424	0.00128414	0.00953342
ENSG00000196616	ADH1B	protein_coding	13.4404	7.78717	0.000630907	0.005423
ENSG00000143416	SELENBP1	protein_coding	138.285	7.78239	3.58543e-09	3.06117e-07
ENSG00000234362	LINC01914	LncRNA	13.5143	7.73748	0.000178772	0.00195526
ENSG00000243566	UPK3B	protein_coding	722.457	7.71289	8.66789e-15	8.77095e-12
ENSG00000124875	CXCL6	protein_coding	26.4541	7.70135	6.79218e-08	3.26706e-06
ENSG00000137573	SULF1	protein_coding	802.207	7.6789	2.40063e-10	3.72657e-08
ENSG00000128591	FLNC	protein_coding	889.336	7.66285	9.87827e-18	2.45349e-14
ENSG00000118849	RARRES1	protein_coding	962.552	7.64469	6.58333e-12	2.02094e-09
ENSG00000076344	RGS11	protein_coding	27.0932	7.62594	4.29792e-10	5.70017e-08
ENSG00000182263	FIGN	protein_coding	15.7608	7.60825	6.40943e-05	0.000852542
ENSG00000259823	LYPD8	protein_coding	15.5189	7.59191	0.000645857	0.00552976
ENSG00000003989	SLC7A2	protein_coding	370.641	7.5678	2.37108e-09	2.14504e-07
ENSG00000151892	GFRA1	protein_coding	24.8116	7.56049	2.69098e-05	0.000420927
ENSG00000144891	AGTR1	protein_coding	14.567	7.54433	9.14022e-05	0.00112944
ENSG00000152137	HSPB8	protein_coding	294.128	7.54254	3.00262e-10	4.36354e-08
ENSG00000183580	FBXL7	protein_coding	80.3494	7.52044	2.0058e-08	1.2044e-06
ENSG00000112186	CAP2	protein_coding	44.4726	7.50529	9.71e-10	1.06115e-07
ENSG00000124107	SLPI	protein_coding	781.045	7.46903	6.76434e-08	3.25941e-06
ENSG00000006042	TMEM98	protein_coding	151.725	7.4663	7.52406e-10	8.67363e-08
ENSG00000167779	IGFBP6	protein_coding	239.832	7.4602	5.29471e-10	6.63563e-08
ENSG00000257474	NA	LncRNA	14.3	7.45902	1.40383e-07	5.69895e-06
ENSG00000145284	SCD5	protein_coding	90.778	7.43249	8.86456e-08	4.02976e-06
ENSG00000240583	AQP1	protein_coding	960.6	7.42023	7.45357e-11	1.46503e-08
ENSG00000140937	CDH11	protein_coding	597.819	7.36766	3.33038e-09	2.91632e-07
ENSG00000268234	FKBP4P6	protein_coding	10.6628	7.36417	0.000581946	0.00508129
ENSG00000075223	SEMA3C	protein_coding	1690.6	7.36212	3.81736e-10	5.16307e-08
ENSG00000131459	GFPT2	protein_coding	1126.76	7.35501	7.43789e-14	5.34779e-11
ENSG00000167034	NKX3-1	protein_coding	352.503	7.35058	2.28119e-17	5.19369e-14
ENSG00000156886	ITGAD	protein_coding	43.5972	7.34013	1.93732e-06	4.78135e-05
ENSG00000082438	COBLL1	protein_coding	853.518	7.32093	1.47164e-15	2.3651e-12
ENSG00000249193	HSPD1P5	protein_coding	17.5067	7.30136	1.0184e-06	2.83627e-05
ENSG00000141433	ADCYAP1	protein_coding	58.9785	7.29683	1.87199e-07	7.23405e-06
ENSG00000161896	IP6K3	protein_coding	16.3861	7.29357	0.000372845	0.00354807
ENSG00000136999	CCN3	protein_coding	13.7474	7.29034	1.10228e-07	4.79031e-06
ENSG00000112414	ADGRG6	protein_coding	444.903	7.28908	7.81378e-09	5.73872e-07
ENSG00000169071	ROR2	protein_coding	99.8794	7.27702	8.37874e-08	3.86682e-06
ENSG00000109846	CRYAB	protein_coding	272.404	7.26102	1.19841e-12	4.61473e-10
ENSG00000125872	LRRN4	protein_coding	75.4107	7.19813	2.36864e-13	1.3482e-10
ENSG00000213943	KRT18P17	protein_coding	11.9323	7.16522	2.1815e-06	5.27907e-05
ENSG00000056291	NPFFR2	protein_coding	9.55987	7.15881	2.49668e-06	5.91603e-05
ENSG00000152952	PLOD2	protein_coding	2317.41	7.15496	5.79508e-10	7.05424e-08
ENSG00000134339	SAA2	protein_coding	149.963	7.15406	2.17107e-07	8.20411e-06
ENSG00000225968	ELFN1	protein_coding	36.9903	7.14594	4.76348e-10	6.08145e-08
ENSG00000184254	ALDH1A3	protein_coding	271.147	7.13917	6.4314e-10	7.5738e-08
ENSG00000154864	PIEZO2	protein_coding	92.2596	7.13259	3.03032e-07	1.05922e-05
ENSG00000168743	NPNT	protein_coding	131.366	7.11824	1.77635e-08	1.10474e-06
ENSG00000141750	STAC2	protein_coding	15.1613	7.10184	7.02708e-06	0.000141167
ENSG00000164736	SOX17	protein_coding	10.9684	7.08343	0.000908357	0.00726925
ENSG00000156466	GDF6	protein_coding	11.3026	7.07868	4.35223e-06	9.39978e-05
ENSG00000255248	MIR100HG	LncRNA	152.126	7.06742	3.3863e-12	1.1014e-09
ENSG00000176532	PRR15	protein_coding	17.388	7.06098	0.00025015	0.0025616
ENSG00000225217	HSPA7	protein_coding	524.816	7.05494	3.72043e-10	5.08587e-08
ENSG00000185070	FLRT2	protein_coding	85.9026	7.04708	7.8385e-12	2.2783e-09
ENSG00000197444	OGDHL	protein_coding	18.0657	7.04535	9.11692e-05	0.00112758
ENSG00000164850	GPER1	protein_coding	89.0147	7.04442	2.65017e-10	4.02252e-08
ENSG00000162006	MSLNL	protein_coding	10.2099	7.02628	6.36454e-07	1.94093e-05
ENSG00000101680	LAMA1	protein_coding	48.909	7.0182	6.43383e-07	1.95527e-05
ENSG00000183801	OLFML1	protein_coding	91.4254	7.01618	4.71088e-08	2.39676e-06
ENSG00000214548	MEG3	protein_coding	149.273	7.01272	4.0617e-15	4.62374e-12
ENSG00000211649	IGLV7-46	IG V gene	10.0144	6.99988	5.50758e-08	2.74585e-06
ENSG00000125845	BMP2	protein_coding	120.527	6.99015	2.20557e-08	1.29033e-06
ENSG00000177283	FZD8	protein_coding	73.1713	6.98808	3.48315e-11	7.77285e-09
ENSG00000183960	KCNH8	protein_coding	16.8723	6.98247	2.89635e-07	1.02501e-05
ENSG00000224520	KRT8P45	protein_coding	16.9143	6.96696	3.71793e-06	8.21825e-05
ENSG00000164128	NPY1R	protein_coding	10.0324	6.964	3.2805e-07	1.12613e-05
ENSG00000137077	CCL21	protein_coding	7.73595	6.96208	4.11257e-05	0.000594809
ENSG00000205038	PKHD1L1	protein_coding	53.5745	6.95507	3.11995e-11	7.41218e-09
ENSG00000165457	FOLR2	protein_coding	70.4361	6.95489	2.32574e-07	8.64509e-06
INGMG_001870	NA	LncRNA	8.58869	6.95156	1.34313e-05	0.000238877
ENSG00000185904	LINC00839	LncRNA	69.8504	6.94064	0.000213289	0.00225316
ENSG00000229417	NPM1P25	protein_coding	17.8782	6.93332	1.09319e-08	7.48547e-07
ENSG00000125378	BMP4	protein_coding	35.8522	6.927	1.66983e-10	2.78179e-08
ENSG00000170396	ZNF804A	protein_coding	58.8876	6.91896	2.0888e-09	1.93272e-07
ENSG00000070808	CAMK2A	protein_coding	28.3839	6.88987	1.55176e-07	6.1532e-06
ENSG00000276980	NA	LncRNA	7.88105	6.88151	1.31461e-06	3.48237e-05
ENSG00000130707	ASS1	protein_coding	443.95	6.86864	1.11619e-09	1.15538e-07
ENSG00000183876	ARSI	protein_coding	48.2627	6.86281	9.93974e-10	1.06915e-07
ENSG00000105825	TFPI2	protein_coding	210.14	6.83576	8.60054e-13	3.67149e-10
ENSG00000218014	KRT19P1	protein_coding	12.8059	6.83274	2.056e-05	0.000338181
ENSG00000000971	CFH	protein_coding	318.537	6.83085	3.47522e-13	1.75827e-10
ENSG00000104369	JPH1	protein_coding	37.1792	6.82661	1.11474e-05	0.000203446
ENSG00000109255	NMU	protein_coding	97.9738	6.82184	1.51819e-06	3.89836e-05
ENSG00000113140	SPARC	protein_coding	1839.84	6.81787	1.48679e-13	9.67155e-11
ENSG00000173068	BNC2	protein_coding	82.9222	6.81204	4.09416e-10	5.45642e-08
ENSG00000230521	NA	Transcribed unprocessed pseudogene	7.16819	6.80552	3.72465e-05	0.000549467
ENSG00000136574	GATA4	protein_coding	9.26763	6.78272	3.76451e-05	0.000554149
ENSG00000134138	MEIS2	protein_coding	114.926	6.77874	1.52658e-07	6.08872e-06
ENSG00000146122	DAAM2	protein_coding	12.0423	6.77814	1.28362e-08	8.45053e-07
ENSG00000198542	ITGBL1	protein_coding	15.8178	6.77365	4.27091e-06	9.25341e-05
ENSG00000122679	RAMP3	protein_coding	7.39271	6.77193	4.98518e-05	0.000694899
ENSG00000162706	CADM3	protein_coding	38.1649	6.76647	1.78713e-05	0.000301155
ENSG00000188176	SMTNL2	protein_coding	12.2519	6.76474	1.77126e-06	4.45194e-05
ENSG00000119938	PPP1R3C	protein_coding	21.9176	6.75352	7.36169e-09	5.48035e-07
ENSG00000167757	KLK11	protein_coding	100.77	6.73659	0.000276264	0.00278825
ENSG00000183578	TNFAIP8L3	protein_coding	39.7863	6.71487	5.08081e-09	4.01193e-07
ENSG00000104267	CA2	protein_coding	136.725	6.70413	2.57942e-13	1.40945e-10
ENSG00000261226	NA	LncRNA	11.8992	6.70312	1.13271e-05	0.000206312
ENSG00000122870	BICC1	protein_coding	156.022	6.69193	2.27682e-10	3.59567e-08
ENSG00000123496	IL13RA2	protein_coding	46.5322	6.6917	0.00120317	0.00905307
ENSG00000140285	FGF7	protein_coding	158.884	6.67362	1.19925e-12	4.61473e-10
ENSG00000154133	ROBO4	protein_coding	18.6099	6.62815	1.40027e-05	0.000246658
ENSG00000178882	RFLNA	protein_coding	21.3805	6.62723	6.81824e-12	2.06979e-09
ENSG00000112562	SMOC2	protein_coding	55.0696	6.58769	9.94678e-07	2.78324e-05
ENSG00000211664	IGLV2-18	IG V gene	5.78455	6.5804	7.38515e-05	0.000954445
ENSG00000174226	SNX31	protein_coding	9.75143	6.58012	7.69402e-06	0.000151447
ENSG00000244094	SPRR2F	protein_coding	8.5666	6.57127	0.0001543	0.00173984
ENSG00000233783	NA	LncRNA	6.80878	6.55834	0.000106441	0.00127772
ENSG00000162747	FCGR3B	protein_coding	22.2798	6.55767	0.000631555	0.00542601
ENSG00000158482	SNX29P1	protein_coding	6.94623	6.55602	1.73842e-07	6.81425e-06
ENSG00000178789	CD300LB	protein_coding	27.5446	6.54512	1.22233e-09	1.23229e-07
ENSG00000161940	BCL6B	protein_coding	54.7635	6.54153	1.94771e-10	3.13019e-08
ENSG00000154736	ADAMTS5	protein_coding	21.6166	6.53966	6.39692e-06	0.000131012
ENSG00000168077	SCARA3	protein_coding	38.3505	6.53729	4.98339e-09	3.94641e-07
ENSG00000169604	ANTXR1	protein_coding	412.578	6.51037	1.02979e-08	7.12274e-07
ENSG00000054938	CHRDL2	protein_coding	50.7552	6.50295	4.93166e-05	0.000687789
ENSG00000227300	KRT16P2	protein_coding	5.42271	6.48243	0.000358614	0.00344504
ENSG00000091986	CCDC80	protein_coding	2107	6.47816	5.5009e-16	1.00193e-12
ENSG00000206432	TMEM200C	protein_coding	6.81747	6.47663	8.94468e-06	0.000170531
ENSG00000171051	FPR1	protein_coding	58.3577	6.4632	5.01401e-11	1.05375e-08
ENSG00000174804	FZD4	protein_coding	35.7786	6.4539	5.14401e-09	4.02692e-07
ENSG00000270607	LEISA1	protein_coding	9.6118	6.44978	2.89573e-07	1.02501e-05
ENSG00000106004	HOXA5	protein_coding	63.7309	6.4465	1.35386e-08	8.76514e-07
ENSG00000218336	TENM3	protein_coding	18.1887	6.43478	9.38026e-09	6.58812e-07
ENSG00000211962	IGHV1-46	IG V gene	19.8158	6.43215	2.09034e-06	5.08648e-05
ENSG00000233608	TWIST2	protein_coding	26.2798	6.42911	1.76716e-06	4.45194e-05
ENSG00000234456	MAGI2-AS3	LncRNA	98.8802	6.42826	5.69573e-18	1.55613e-14
ENSG00000242173	ARHGDIG	protein_coding	17.5758	6.42618	1.31097e-07	5.41043e-06
ENSG00000138650	PCDH10	protein_coding	6.4202	6.41914	0.000120969	0.00142273
ENSG00000127955	GNAI1	protein_coding	156.226	6.41808	3.38783e-13	1.7464e-10
ENSG00000114698	PLSCR4	protein_coding	56.2932	6.4145	3.30787e-09	2.90593e-07
ENSG00000138944	SHISAL1	protein_coding	75.9549	6.41348	2.86238e-11	6.85991e-09
ENSG00000240622	RPL7P15	protein_coding	9.37896	6.39782	4.58679e-06	9.87515e-05
ENSG00000173641	HSPB7	protein_coding	22.3132	6.38507	1.43582e-07	5.81081e-06
ENSG00000111057	KRT18	protein_coding	2206.03	6.38453	1.00529e-12	4.16146e-10
ENSG00000176046	NUPR1	protein_coding	283.862	6.38154	6.08298e-08	2.97837e-06
ENSG00000111907	TPD52L1	protein_coding	173.553	6.37955	3.53592e-12	1.13653e-09
ENSG00000154734	ADAMTS1	protein_coding	178.054	6.37683	1.58983e-10	2.68122e-08
ENSG00000183242	WT1-AS	LncRNA	6.4029	6.36281	0.000426169	0.00395226
ENSG00000215089	KRT18P11	protein_coding	11.4821	6.36214	0.000164083	0.00182827
ENSG00000254602	MIR130AHG	LncRNA	9.6209	6.35612	7.46781e-06	0.000148169
ENSG00000112541	PDE10A	protein_coding	38.8274	6.34802	5.12362e-05	0.000709131
ENSG00000161249	DMKN	protein_coding	130.083	6.33996	3.99839e-10	5.3549e-08
ENSG00000231203	KRT8P10	protein_coding	17.4762	6.33956	8.61585e-06	0.000165396
ENSG00000254535	PABPC4L	protein_coding	4.86205	6.33936	0.000176038	0.00193387
ENSG00000132321	IQCA1	protein_coding	12.882	6.33375	6.97268e-08	3.33626e-06
ENSG00000117069	ST6GALNAC5	protein_coding	14.3688	6.33268	1.49996e-07	6.00008e-06
ENSG00000204175	GPRIN2	protein_coding	5.14112	6.31852	0.00024452	0.00251789
ENSG00000095596	CYP26A1	protein_coding	23.7057	6.31626	3.7502e-06	8.27618e-05
ENSG00000129009	ISLR	protein_coding	15.4669	6.31065	1.77018e-06	4.45194e-05
ENSG00000081803	CADPS2	protein_coding	75.4609	6.29975	3.88582e-05	0.000569246
ENSG00000235649	MXRA5Y	protein_coding	4.53995	6.29703	0.000606168	0.00524086
ENSG00000127920	GNG11	protein_coding	54.0624	6.29655	4.47411e-12	1.41552e-09
ENSG00000087116	ADAMTS2	protein_coding	111.089	6.29383	4.9764e-10	6.32374e-08
CATG00000108332	NA	NA	5.10762	6.29303	0.000624509	0.00537731
ENSG00000170775	GPR37	protein_coding	28.7423	6.29182	0.000994999	0.00779221
ENSG00000124839	RAB17	protein_coding	38.4529	6.29127	6.04264e-07	1.86123e-05
ENSG00000159713	TPPP3	protein_coding	21.5552	6.28487	4.28169e-08	2.22396e-06
ENSG00000177469	CAVIN1	protein_coding	1470.99	6.28355	3.83847e-14	3.27721e-11
ENSG00000107562	CXCL12	protein_coding	54.0175	6.28128	1.12124e-12	4.44679e-10
ENSG00000147100	SLC16A2	protein_coding	78.1401	6.26906	3.19358e-06	7.21771e-05
ENSG00000179292	TMEM151A	protein_coding	35.4403	6.26725	1.81322e-08	1.11826e-06
ENSG00000184347	SLIT3	protein_coding	45.0238	6.26722	9.91474e-09	6.92789e-07
ENSG00000112769	LAMA4	protein_coding	436.484	6.26261	1.97125e-08	1.19202e-06
ENSG00000106483	SFRP4	protein_coding	12.9533	6.26247	2.69518e-10	4.04589e-08
ENSG00000154175	ABI3BP	protein_coding	219.527	6.25665	2.59887e-15	3.22744e-12
ENSG00000175920	DOK7	protein_coding	19.5006	6.25133	7.61125e-09	5.62019e-07
ENSG00000104213	PDGFRL	protein_coding	32.2725	6.25063	2.2901e-07	8.57094e-06
ENSG00000184194	GPR173	protein_coding	7.79242	6.23925	2.4644e-05	0.000392822
ENSG00000185271	KLHL33	protein_coding	8.0843	6.23921	5.8435e-07	1.80804e-05
ENSG00000256849	TCP1P3	protein_coding	9.43302	6.23398	6.92287e-06	0.000139381
ENSG00000240759	RPS27P21	protein_coding	11.2342	6.21805	3.00355e-05	0.000460752
ENSG00000142627	EPHA2	protein_coding	776.859	6.20232	7.12419e-07	2.13187e-05
ENSG00000112964	GHR	protein_coding	5.70737	6.19406	4.7151e-05	0.000664959
ENSG00000259353	NA	LncRNA	4.49638	6.19291	0.000318706	0.00313011
ENSG00000163661	PTX3	protein_coding	140.478	6.18589	4.51553e-10	5.87471e-08
ENSG00000111799	COL12A1	protein_coding	389.095	6.18564	4.3747e-10	5.74622e-08
ENSG00000259583	ALDH1A3-AS1	LncRNA	9.5261	6.18225	1.0713e-06	2.95644e-05
ENSG00000036672	USP2	protein_coding	56.271	6.17683	6.76884e-10	7.90306e-08
ENSG00000158481	CD1C	protein_coding	42.7599	6.17667	7.12357e-10	8.28183e-08
ENSG00000006283	CACNA1G	protein_coding	19.6032	6.17213	1.0005e-06	2.79495e-05
ENSG00000163739	CXCL1	protein_coding	1456.23	6.17171	1.69443e-07	6.67054e-06
ENSG00000143196	DPT	protein_coding	4.26717	6.15127	3.44567e-07	1.17089e-05
ENSG00000279312	NA	LncRNA	9.46205	6.14739	3.27254e-05	0.000492749
ENSG00000162366	PDZK1IP1	protein_coding	182.65	6.14729	0.00014446	0.00165623
ENSG00000170421	KRT8	protein_coding	4353.4	6.13401	2.78873e-07	9.93361e-06
ENSG00000185483	ROR1	protein_coding	81.2888	6.12954	8.42719e-10	9.39753e-08
ENSG00000108684	ASIC2	protein_coding	4.67902	6.129	0.000307459	0.00304571
ENSG00000187955	COL14A1	protein_coding	50.1782	6.11783	1.10523e-09	1.15251e-07
ENSG00000104055	TGM5	protein_coding	8.49047	6.11161	9.96606e-06	0.0001851
ENSG00000205018	NA	LncRNA	12.2656	6.10107	0.000190804	0.00206127
ENSG00000112183	RBM24	protein_coding	7.77888	6.08918	0.00033171	0.00323666
ENSG00000115461	IGFBP5	protein_coding	557.733	6.08823	1.33087e-05	0.000237341
ENSG00000165323	FAT3	protein_coding	10.3042	6.0834	1.47987e-06	3.83237e-05
ENSG00000099960	SLC7A4	protein_coding	23.4292	6.08177	2.19441e-06	5.30562e-05
ENSG00000183853	KIRREL1	protein_coding	322.508	6.0801	1.10522e-09	1.15251e-07
ENSG00000164520	RAET1E	protein_coding	14.3213	6.07815	9.16562e-05	0.00113105
ENSG00000110328	GALNT18	protein_coding	36.903	6.07388	3.07958e-07	1.07181e-05
ENSG00000187244	BCAM	protein_coding	281.45	6.07252	9.03827e-08	4.07483e-06
ENSG00000123094	RASSF8	protein_coding	350.698	6.07116	1.19536e-13	8.16461e-11
ENSG00000064205	CCN5	protein_coding	7.17952	6.07047	1.86654e-05	0.000312474
ENSG00000219438	TAFA5	protein_coding	14.183	6.06205	2.6627e-07	9.57206e-06
ENSG00000163697	APBB2	protein_coding	161.585	6.06129	1.71648e-11	4.46627e-09
ENSG00000101333	PLCB4	protein_coding	32.0671	6.05917	9.79111e-05	0.00119116
ENSG00000214207	KRT18P10	protein_coding	5.69771	6.05603	0.000896742	0.00719104
ENSG00000266019	MIR3609	LncRNA	5.07864	6.0554	0.000221957	0.00232608
ENSG00000254285	KRT8P3	protein_coding	85.4674	6.04244	1.69088e-08	1.06445e-06
ENSG00000162753	SLC9C2	protein_coding	6.25511	6.03928	0.000152345	0.00172206
ENSG00000204136	GGTA1	protein_coding	26.3417	6.03611	1.33235e-06	3.52041e-05
ENSG00000108691	CCL2	protein_coding	1368.47	6.03537	4.64264e-10	5.98615e-08
ENSG00000201428	RN7SKP71	protein_coding	8.35281	6.02612	1.84911e-05	0.000310317
ENSG00000173391	OLR1	protein_coding	1068.03	6.02587	3.19396e-06	7.21771e-05
ENSG00000099812	MISP	protein_coding	179.948	6.02234	1.25219e-06	3.35639e-05
ENSG00000169255	B3GALNT1	protein_coding	78.2689	6.02068	1.25348e-11	3.39073e-09
ENSG00000144057	ST6GAL2	protein_coding	5.67106	6.01746	0.00031274	0.00308796
ENSG00000169908	TM4SF1	protein_coding	2997.06	6.01505	3.84359e-07	1.27215e-05
ENSG00000180447	GAS1	protein_coding	46.2916	6.00957	5.96697e-11	1.21659e-08
ENSG00000169242	EFNA1	protein_coding	577.196	6.00531	1.35013e-10	2.33461e-08
ENSG00000083857	FAT1	protein_coding	715.618	5.97712	8.39038e-10	9.39482e-08
ENSG00000163430	FSTL1	protein_coding	1187.43	5.97429	9.75303e-13	4.09942e-10
ENSG00000150782	IL18	protein_coding	254.122	5.96744	1.13224e-10	2.06226e-08
ENSG00000118785	SPP1	protein_coding	1470.5	5.96437	1.16e-07	4.97524e-06
ENSG00000133110	POSTN	protein_coding	85.7439	5.94722	3.57823e-09	3.06117e-07
ENSG00000125968	ID1	protein_coding	281.14	5.94623	6.32783e-11	1.2712e-08
ENSG00000145147	SLIT2	protein_coding	46.3797	5.94393	8.05891e-10	9.13599e-08
ENSG00000125848	FLRT3	protein_coding	15.6662	5.94171	0.000969526	0.00763355
CATG00000096146	NA	LncRNA	10.151	5.94127	0.000213445	0.0022533
ENSG00000175356	SCUBE2	protein_coding	6.35195	5.94014	1.621e-05	0.000277838
ENSG00000165655	ZNF503	protein_coding	98.1646	5.93793	4.82795e-09	3.84561e-07
ENSG00000154914	USP43	protein_coding	73.9664	5.93661	0.000188009	0.00203752
ENSG00000164694	FNDC1	protein_coding	5.42951	5.93331	1.02445e-10	1.91706e-08
ENSG00000157214	STEAP2	protein_coding	145.747	5.9294	5.51761e-09	4.29477e-07
ENSG00000167646	DNAAF3	protein_coding	5.76826	5.92879	0.000115401	0.00136962
ENSG00000024422	EHD2	protein_coding	463.326	5.92815	1.0425e-10	1.92447e-08
ENSG00000173110	HSPA6	protein_coding	1453.32	5.92395	4.52345e-07	1.46082e-05
ENSG00000249661	TNRC18P1	protein_coding	3.30785	5.92115	3.54668e-05	0.000527771
CATG00000103388	NA	LncRNA	5.49887	5.92039	0.00132309	0.00978302
ENSG00000163239	TDRD10	protein_coding	7.641	5.90538	0.000212696	0.00225011
ENSG00000274576	IGHV2-70	IG V gene	14.1718	5.90109	4.31364e-05	0.000618326
ENSG00000237125	HAND2-AS1	LncRNA	5.83937	5.89373	0.000746432	0.00621936
ENSG00000151967	SCHIP1	protein_coding	30.3724	5.88966	2.98045e-07	1.04472e-05
ENSG00000148655	LRMDA	protein_coding	20.8905	5.88767	7.82084e-06	0.000153501
ENSG00000176887	SOX11	protein_coding	23.3747	5.88683	2.20179e-06	5.31875e-05
ENSG00000060718	COL11A1	protein_coding	7.01599	5.88648	5.73272e-08	2.83739e-06
ENSG00000178401	DNAJC22	protein_coding	21.2196	5.88508	0.000392031	0.00368952
ENSG00000164330	EBF1	protein_coding	97.426	5.88199	3.66797e-10	5.08587e-08
ENSG00000138772	ANXA3	protein_coding	561.261	5.87791	2.2101e-06	5.32471e-05
ENSG00000114019	AMOTL2	protein_coding	387.024	5.87764	9.78969e-10	1.06559e-07
ENSG00000019991	HGF	protein_coding	41.9679	5.87386	3.93164e-08	2.07367e-06
ENSG00000172482	AGXT	protein_coding	3.53168	5.86169	0.000438548	0.00405008
ENSG00000117114	ADGRL2	protein_coding	124.349	5.85798	1.45584e-08	9.35885e-07
ENSG00000125144	MT1G	protein_coding	399.091	5.8566	5.47971e-05	0.000748556
ENSG00000095777	MYO3A	protein_coding	3.13089	5.84415	0.000208551	0.00221274
ENSG00000271707	ATP1B3P1	protein_coding	8.02698	5.83907	7.56788e-06	0.000149632
ENSG00000103647	CORO2B	protein_coding	23.197	5.83343	4.41435e-08	2.28417e-06
ENSG00000102038	SMARCA1	protein_coding	118.724	5.82985	3.2845e-12	1.08115e-09
ENSG00000259296	NA	LncRNA	5.55568	5.8258	0.000174548	0.00192072
ENSG00000253364	COPDA1	protein_coding	3.76662	5.81957	0.00107671	0.00829343
ENSG00000107731	UNC5B	protein_coding	129.388	5.81704	4.66899e-10	5.9888e-08
ENSG00000142949	PTPRF	protein_coding	1666.9	5.8015	3.45012e-09	2.99241e-07
ENSG00000170549	IRX1	protein_coding	5.42173	5.79696	0.000631006	0.005423
ENSG00000132970	WASF3	protein_coding	20.6752	5.79662	8.05987e-09	5.85648e-07
ENSG00000109072	VTN	protein_coding	278.649	5.79392	1.08917e-11	2.97572e-09
CATG00000099982	NA	LncRNA	6.79366	5.78928	1.0141e-05	0.000187846
ENSG00000113594	LIFR	protein_coding	128.582	5.78314	1.20636e-08	8.0782e-07
INGMG_002223	NA	LncRNA	6.66364	5.77161	0.000707584	0.00598511
ENSG00000171385	KCND3	protein_coding	105.244	5.7658	4.59843e-09	3.70601e-07
ENSG00000147862	NFIB	protein_coding	106.713	5.76547	2.44037e-08	1.4007e-06
ENSG00000146374	RSPO3	protein_coding	8.70054	5.7629	4.83981e-06	0.000103384
ENSG00000221957	KIR2DS4	protein_coding	4.63052	5.76141	0.000337258	0.00327792
ENSG00000240563	L1TD1	protein_coding	7.98571	5.75956	0.00017193	0.00189867
ENSG00000225918	RPL7P59	protein_coding	8.75021	5.75939	3.34721e-05	0.000502743
ENSG00000081479	LRP2	protein_coding	30.3349	5.75106	1.02314e-05	0.000189
ENSG00000182326	C1S	protein_coding	2692.69	5.7448	1.34091e-11	3.59165e-09
ENSG00000183098	GPC6	protein_coding	35.9309	5.74392	5.98616e-08	2.93661e-06
ENSG00000128602	SMO	protein_coding	71.3413	5.7424	8.02301e-10	9.1332e-08
ENSG00000107984	DKK1	protein_coding	89.9422	5.74227	5.24644e-05	0.000721379
ENSG00000197702	PARVA	protein_coding	173.693	5.74123	1.30035e-12	4.8667e-10
INGMG_001505	NA	LncRNA	12.5621	5.7391	6.30432e-06	0.000129699
ENSG00000171227	TMEM37	protein_coding	27.2997	5.7375	4.74668e-08	2.41049e-06
CATG00000111739	NA	LncRNA	4.89174	5.73735	0.000876026	0.00705195
ENSG00000132185	FCRLA	protein_coding	202.501	5.73717	1.05445e-08	7.25656e-07
ENSG00000118946	PCDH17	protein_coding	16.5755	5.73583	0.000166833	0.00185061
ENSG00000150337	FCGR1A	protein_coding	14.7352	5.73018	1.88999e-07	7.283e-06
ENSG00000124743	KLHL31	protein_coding	26.6134	5.72089	5.61861e-07	1.75435e-05
ENSG00000211965	IGHV3-49	IG V gene	4.90231	5.71691	1.96322e-05	0.000325665
ENSG00000141668	CBLN2	protein_coding	14.5723	5.69944	5.10004e-05	0.000706582
ENSG00000258628	RHPN2P1	protein_coding	19.2524	5.69921	0.00104993	0.00812841
ENSG00000182492	BGN	protein_coding	239.47	5.69493	1.55081e-09	1.49716e-07
ENSG00000168938	PPIC	protein_coding	38.07	5.69262	2.21933e-08	1.2956e-06
ENSG00000198680	TUSC1	protein_coding	33.8283	5.68428	7.35868e-08	3.48434e-06
ENSG00000244682	FCGR2C	protein_coding	117.026	5.68352	1.10209e-09	1.15251e-07
ENSG00000244585	RPL12P33	protein_coding	3.84068	5.68327	8.35152e-06	0.000161453
ENSG00000131773	KHDRBS3	protein_coding	49.8234	5.67835	4.47523e-10	5.85014e-08
ENSG00000168497	CAVIN2	protein_coding	28.1164	5.67231	2.94436e-08	1.6284e-06
ENSG00000203805	PLPP4	protein_coding	3.30066	5.66803	0.000140279	0.00161432
ENSG00000223414	NA	LncRNA	5.67431	5.66794	0.000244571	0.00251789
ENSG00000142611	PRDM16	protein_coding	22.2997	5.66423	4.76063e-07	1.52301e-05
ENSG00000124006	OBSL1	protein_coding	155.475	5.66233	1.02908e-09	1.09399e-07
ENSG00000062038	CDH3	protein_coding	443.83	5.64801	3.03178e-07	1.05922e-05
ENSG00000186493	IRX2-DT	LncRNA	9.18574	5.64713	0.000738822	0.00617372
ENSG00000188873	RPL10AP2	protein_coding	68.4733	5.6438	3.47097e-09	3.00096e-07
ENSG00000100234	TIMP3	protein_coding	507.33	5.64169	7.4539e-06	0.000148
ENSG00000089225	TBX5	protein_coding	10.8298	5.64003	0.000607271	0.00524873
ENSG00000239571	IGKV2D-30	IG V gene	2.67527	5.63972	0.00100085	0.00781487
ENSG00000255282	WTAPP1	protein_coding	5.35023	5.63231	0.000942048	0.00748624
ENSG00000123405	NFE2	protein_coding	5.02433	5.6314	0.000101271	0.00122534
ENSG00000153012	LGI2	protein_coding	9.61397	5.63103	3.09165e-07	1.07464e-05
ENSG00000205363	INSYN1	protein_coding	3.65445	5.62932	0.00031361	0.00309319
ENSG00000017427	IGF1	protein_coding	3.87532	5.62686	3.53634e-05	0.00052652
ENSG00000163453	IGFBP7	protein_coding	164.059	5.625	1.25887e-10	2.21894e-08
ENSG00000162493	PDPN	protein_coding	366.685	5.62492	9.70355e-06	0.00018121
ENSG00000258153	HSPE1P4	protein_coding	32.7155	5.62142	5.90194e-07	1.82406e-05
ENSG00000125965	GDF5	protein_coding	11.0421	5.61983	2.35054e-05	0.000377982
ENSG00000149131	SERPING1	protein_coding	1067.59	5.61625	1.23812e-08	8.23031e-07
ENSG00000179542	SLITRK4	protein_coding	11.9743	5.61525	0.000323475	0.00316875
ENSG00000211595	IGKJ3	protein_coding	13.2013	5.6149	3.83314e-07	1.27094e-05
ENSG00000262454	MIR193BHG	LncRNA	6.1707	5.61479	8.32068e-06	0.000161112
ENSG00000130700	GATA5	protein_coding	2.61025	5.61056	0.00112752	0.00859997
ENSG00000162407	PLPP3	protein_coding	344.999	5.60647	3.91598e-10	5.27037e-08
ENSG00000114771	AADAC	protein_coding	3.49831	5.60369	0.000791217	0.00650913
ENSG00000181458	TMEM45A	protein_coding	60.2757	5.60198	7.24916e-08	3.44442e-06
ENSG00000270225	MTCO2P22	protein_coding	10.3098	5.60066	1.45988e-05	0.000255184
ENSG00000185565	LSAMP	protein_coding	8.67182	5.59729	1.3061e-06	3.46784e-05
ENSG00000225616	RPL27pseudogenes	Processed pseudogene	34.9138	5.59533	8.35777e-09	6.04081e-07
ENSG00000107317	PTGDS	protein_coding	42.8028	5.59055	1.15854e-08	7.80133e-07
ENSG00000189001	SBSN	protein_coding	30.4434	5.58849	9.75476e-08	4.32638e-06
ENSG00000146648	EGFR	protein_coding	737.233	5.58539	2.98085e-09	2.63559e-07
ENSG00000196781	TLE1	protein_coding	202.638	5.58439	1.86861e-12	6.80698e-10
ENSG00000134259	NGF	protein_coding	15.6233	5.57892	7.51896e-06	0.000148967
ENSG00000101335	MYL9	protein_coding	212.391	5.57755	4.16766e-08	2.18131e-06
ENSG00000234184	LINC01781	LncRNA	12.8923	5.57486	2.5729e-05	0.000406089
ENSG00000108379	WNT3	protein_coding	3.15722	5.57276	2.96249e-05	0.000456247
ENSG00000182759	MAFA	protein_coding	9.71448	5.56863	7.27876e-05	0.000943372
ENSG00000188958	UTS2B	protein_coding	5.11083	5.5612	6.84554e-06	0.000138129
ENSG00000158246	TENT5B	protein_coding	17.4322	5.55985	3.22952e-05	0.000488289
ENSG00000188822	CNR2	protein_coding	113.059	5.55087	5.34387e-10	6.66667e-08
ENSG00000009950	MLXIPL	protein_coding	21.803	5.54524	1.16974e-07	5.00915e-06
CATG00000114155	NA	LncRNA	5.87466	5.53886	0.000885675	0.00711901
ENSG00000050628	PTGER3	protein_coding	47.5242	5.53398	4.10009e-08	2.1542e-06
ENSG00000162891	IL20	protein_coding	18.5461	5.53387	5.82094e-08	2.87109e-06
ENSG00000115226	FNDC4	protein_coding	17.3223	5.53294	1.10365e-05	0.000201825
ENSG00000110237	ARHGEF17	protein_coding	123.778	5.52422	8.91671e-10	9.86289e-08
ENSG00000236060	HSPB1P1	protein_coding	31.2189	5.52291	3.37196e-06	7.56365e-05
ENSG00000173267	SNCG	protein_coding	37.3744	5.51479	1.98124e-06	4.87481e-05
ENSG00000064042	LIMCH1	protein_coding	363.433	5.51095	5.92392e-06	0.00012313
ENSG00000130598	TNNI2	protein_coding	7.68997	5.50514	3.35962e-06	7.54436e-05
ENSG00000107159	CA9	protein_coding	87.4459	5.49985	0.000257748	0.00262758
ENSG00000078549	ADCYAP1R1	protein_coding	6.89005	5.49716	8.02041e-05	0.00102025
ENSG00000249992	TMEM158	protein_coding	39.4339	5.49367	9.30784e-05	0.00114554
ENSG00000172380	GNG12	protein_coding	300.332	5.48418	2.50474e-10	3.82302e-08
ENSG00000142871	CCN1	protein_coding	928.682	5.48116	1.58595e-09	1.52034e-07
ENSG00000050030	NEXMIF	protein_coding	22.2012	5.47604	1.4512e-09	1.41097e-07
ENSG00000138308	PLA2G12B	protein_coding	4.59559	5.47483	0.000710753	0.00600262
ENSG00000162817	C1orf115	protein_coding	46.3496	5.47378	1.16924e-09	1.19197e-07
ENSG00000278978	NA	LncRNA	17.2114	5.47168	4.19384e-07	1.36243e-05
ENSG00000196159	FAT4	protein_coding	28.2847	5.47101	8.13057e-06	0.000158442
ENSG00000254952	LINC02705	LncRNA	5.52198	5.46806	0.00056563	0.0049674
ENSG00000174938	SEZ6L2	protein_coding	103.903	5.46771	1.84037e-07	7.13552e-06
ENSG00000120594	PLXDC2	protein_coding	335.537	5.46687	7.77428e-10	8.90916e-08
ENSG00000236762	RPL19P16	protein_coding	23.5743	5.46585	1.13749e-07	4.92509e-06
ENSG00000197549	PRAMENP	protein_coding	2.80848	5.46324	8.64038e-05	0.00108003
ENSG00000133048	CHI3L1	protein_coding	185.483	5.45854	2.38399e-08	1.37443e-06
ENSG00000170561	IRX2	protein_coding	22.0161	5.45437	2.88106e-06	6.6537e-05
ENSG00000109458	GAB1	protein_coding	121.476	5.45123	6.99578e-11	1.39512e-08
ENSG00000223802	CERS1	protein_coding	10.3678	5.44731	0.000205278	0.00218141
ENSG00000174059	CD34	protein_coding	20.2206	5.44595	1.91767e-05	0.000318883
ENSG00000103154	NECAB2	protein_coding	11.8788	5.44151	0.000322678	0.00316223
ENSG00000179148	ALOXE3	protein_coding	18.0852	5.43944	1.23342e-06	3.31677e-05
ENSG00000211662	IGLV3-21	IG V gene	89.013	5.43922	3.22648e-05	0.000488099
ENSG00000133216	EPHB2	protein_coding	222.542	5.43263	8.80767e-08	4.01057e-06
ENSG00000224773	HSPA8P7	protein_coding	9.18828	5.43159	1.67704e-05	0.00028583
ENSG00000196581	AJAP1	protein_coding	8.74727	5.43021	7.11092e-09	5.33729e-07
ENSG00000186354	NA	LncRNA	4.62056	5.42338	0.000382926	0.0036238
INGMG_001726	NA	LncRNA	14.6886	5.42204	2.33227e-05	0.000375707
ENSG00000107338	SHB	protein_coding	102.454	5.42129	9.00942e-10	9.92526e-08
ENSG00000106571	GLI3	protein_coding	33.5566	5.41432	6.16846e-07	1.89358e-05
ENSG00000197905	TEAD4	protein_coding	64.5999	5.40187	1.12964e-08	7.66159e-07
ENSG00000231852	CYP21A2	protein_coding	7.44802	5.40017	3.2997e-05	0.000496154
ENSG00000224389	C4B	protein_coding	139.926	5.39747	1.30066e-09	1.28751e-07
ENSG00000166173	LARP6	protein_coding	30.0273	5.39425	1.16294e-06	3.16146e-05
ENSG00000146242	TPBG	protein_coding	10.8296	5.39093	1.54454e-05	0.000266572
ENSG00000242371	IGKV1-39	IG V gene	15.5775	5.38192	2.96962e-05	0.000457087
ENSG00000221869	CEBPD	protein_coding	375.89	5.37956	1.74211e-11	4.4902e-09
ENSG00000200488	RN7SKP203	protein_coding	14.0456	5.37617	0.000485047	0.00439098
ENSG00000113645	WWC1	protein_coding	510.541	5.36967	5.97389e-13	2.72021e-10
ENSG00000276600	RAB7B	protein_coding	56.3727	5.36216	5.41052e-10	6.71913e-08
ENSG00000172037	LAMB2	protein_coding	378.191	5.36146	4.64501e-10	5.98615e-08
ENSG00000174460	ZCCHC12	protein_coding	16.5016	5.36035	8.18206e-08	3.80174e-06
ENSG00000115963	RND3	protein_coding	627.057	5.35891	2.17973e-09	2.00513e-07
CABG_008979	NA	LncRNA	7.94535	5.35543	1.78196e-06	4.47062e-05
ENSG00000147255	IGSF1	protein_coding	5.31545	5.35164	0.000402866	0.00376298
ENSG00000178531	CTXN1	protein_coding	32.7914	5.33753	6.10378e-07	1.87794e-05
ENSG00000223969	NA	LncRNA	9.03705	5.3285	1.38348e-05	0.000243859
ENSG00000177508	IRX3	protein_coding	36.9768	5.32827	5.47638e-07	1.71977e-05
CABG_003228	NA	LncRNA	16.7109	5.32769	4.8103e-06	0.000102834
ENSG00000204389	HSPA1A	protein_coding	15.5687	5.31115	4.00351e-05	0.000583983
ENSG00000265579	NA	LncRNA	2.55669	5.30824	0.000660639	0.00563337
ENSG00000142583	SLC2A5	protein_coding	125.175	5.30724	6.21487e-10	7.40596e-08
ENSG00000182013	PNMA8A	protein_coding	26.2654	5.30626	0.00124728	0.00929796
ENSG00000137203	TFAP2A	protein_coding	108.678	5.2976	1.53232e-07	6.10271e-06
ENSG00000150551	LYPD1	protein_coding	3.30155	5.29212	0.000790586	0.00650787
ENSG00000152661	GJA1	protein_coding	370.727	5.29146	9.50094e-08	4.24967e-06
ENSG00000010327	STAB1	protein_coding	621.13	5.2911	3.6391e-11	8.01804e-09
ENSG00000134817	APLNR	protein_coding	9.38358	5.28444	3.09713e-06	7.03966e-05
ENSG00000224468	LAMC1-AS1	LncRNA	3.64552	5.28062	0.00100336	0.00782999
ENSG00000100625	SIX4	protein_coding	47.6226	5.27995	3.54213e-06	7.88861e-05
ENSG00000268592	RAET1E-AS1	LncRNA	3.30759	5.27818	9.73396e-05	0.00118686
ENSG00000108947	EFNB3	protein_coding	32.2712	5.2776	1.07645e-06	2.96468e-05
ENSG00000012171	SEMA3B	protein_coding	435.604	5.27656	1.56956e-09	1.50993e-07
ENSG00000185630	PBX1	protein_coding	132.56	5.26523	1.76618e-10	2.90686e-08
ENSG00000165685	TMEM52B	protein_coding	23.0403	5.26007	2.87113e-06	6.63638e-05
ENSG00000050820	BCAR1	protein_coding	319.429	5.2559	2.81927e-10	4.18616e-08
ENSG00000154654	NCAM2	protein_coding	5.67182	5.25589	1.8659e-05	0.000312474
INGMG_000226	NA	LncRNA	19.9156	5.24836	1.20083e-06	3.23869e-05
ENSG00000121898	CPXM2	protein_coding	8.5232	5.24768	0.000326368	0.00319366
ENSG00000241644	INMT	protein_coding	78.0709	5.24593	2.98261e-07	1.04472e-05
ENSG00000197705	KLHL14	protein_coding	20.8668	5.23934	3.30633e-06	7.44088e-05
ENSG00000272502	SNTB1-AS1	LncRNA	3.57109	5.23744	0.000515354	0.00461942
ENSG00000141756	FKBP10	protein_coding	233.598	5.23551	6.82261e-09	5.14918e-07
ENSG00000248568	KRT8P48	protein_coding	5.28915	5.23411	0.000351004	0.00338622
ENSG00000107438	PDLIM1	protein_coding	395.513	5.23401	2.90934e-13	1.52858e-10
ENSG00000180532	ZSCAN4	protein_coding	3.84423	5.23328	0.000185637	0.00202144
INGMG_lincRNAs_TIL_001781	NA	LncRNA	36.4157	5.23153	1.89911e-05	0.000316762
ENSG00000135547	HEY2	protein_coding	3.70201	5.22586	6.77518e-06	0.000136912
ENSG00000249667	LINC01259	LncRNA	3.19458	5.22072	5.91819e-05	0.000796115
ENSG00000246695	RASSF8-AS1	LncRNA	28.0604	5.21905	1.21557e-07	5.12232e-06
ENSG00000095970	TREM2	protein_coding	32.8889	5.21479	1.94981e-07	7.47137e-06
ENSG00000171016	PYGO1	protein_coding	15.0573	5.21242	1.03588e-07	4.54275e-06
ENSG00000175084	DES	protein_coding	2.44602	5.21074	0.000321614	0.00315505
ENSG00000185222	TCEAL9	protein_coding	243.365	5.20741	9.90519e-10	1.06915e-07
ENSG00000269404	SPIB	protein_coding	132.208	5.20605	1.13013e-08	7.66159e-07
ENSG00000145864	GABRB2	protein_coding	4.91231	5.20172	0.00124657	0.00929769
ENSG00000101938	CHRDL1	protein_coding	43.5658	5.19992	0.000343485	0.00332695
ENSG00000149571	KIRREL3	protein_coding	17.3465	5.19291	1.34382e-08	8.76243e-07
ENSG00000170323	FABP4	protein_coding	66.9412	5.17974	8.4849e-08	3.90921e-06
ENSG00000155659	VSIG4	protein_coding	104.518	5.1776	3.60618e-08	1.93808e-06
ENSG00000133661	SFTPD	protein_coding	7.04617	5.17747	8.9507e-06	0.000170531
ENSG00000122786	CALD1	protein_coding	457.993	5.1768	3.44592e-09	2.99241e-07
ENSG00000173320	STOX2	protein_coding	10.6142	5.17618	0.000282135	0.00284121
ENSG00000105048	TNNT1	protein_coding	57.8399	5.17452	8.90312e-05	0.00110665
ENSG00000149090	PAMR1	protein_coding	8.88561	5.16912	7.29901e-05	0.000945549
ENSG00000105792	CFAP69	protein_coding	21.7688	5.16234	5.14278e-06	0.000109258
ENSG00000179314	WSCD1	protein_coding	7.01171	5.15879	9.65076e-06	0.000180719
ENSG00000135111	TBX3	protein_coding	110.333	5.15668	8.70083e-07	2.5049e-05
ENSG00000148926	ADM	protein_coding	401.326	5.15484	2.50105e-07	9.1234e-06
ENSG00000057294	PKP2	protein_coding	53.4238	5.15314	4.00412e-06	8.75874e-05
ENSG00000181195	PENK	protein_coding	3.25027	5.15214	0.000512282	0.00459792
ENSG00000070404	FSTL3	protein_coding	631.748	5.1491	7.84044e-12	2.2783e-09
ENSG00000166073	GPR176	protein_coding	29.6711	5.14821	2.95314e-07	1.04107e-05
ENSG00000156218	ADAMTSL3	protein_coding	26.7185	5.14681	4.84293e-05	0.000678184
ENSG00000130702	LAMA5	protein_coding	896.249	5.14077	2.82221e-13	1.51187e-10
ENSG00000131094	C1QL1	protein_coding	23.4812	5.12809	3.67436e-05	0.000544104
ENSG00000104332	SFRP1	protein_coding	33.0452	5.12568	0.000486815	0.00440552
ENSG00000164142	FHIP1A	protein_coding	67.0011	5.12488	4.50753e-12	1.41552e-09
ENSG00000232385	RPS3AP25	protein_coding	48.8566	5.11565	1.30008e-09	1.28751e-07
ENSG00000081189	MEF2C	protein_coding	289.102	5.11384	1.16112e-10	2.09841e-08
ENSG00000141338	ABCA8	protein_coding	13.121	5.11198	3.37054e-05	0.000505138
ENSG00000146373	RNF217	protein_coding	83.8066	5.10511	1.12118e-08	7.63883e-07
ENSG00000162367	TAL1	protein_coding	6.67033	5.10458	0.000155655	0.00175367
ENSG00000237214	RPS9P2	protein_coding	103.987	5.10424	2.33462e-11	5.74633e-09
ENSG00000197614	MFAP5	protein_coding	19.0528	5.10252	4.09783e-06	8.94938e-05
ENSG00000106714	CNTNAP3	protein_coding	5.80997	5.10195	7.78129e-05	0.00099575
ENSG00000106538	RARRES2	protein_coding	405.634	5.10163	1.87331e-09	1.76486e-07
ENSG00000143185	XCL2	protein_coding	37.2131	5.0996	4.08948e-07	1.33967e-05
ENSG00000121207	LRAT	protein_coding	10.4825	5.09764	0.000780106	0.00644295
ENSG00000077942	FBLN1	protein_coding	85.0798	5.09715	3.16315e-10	4.54845e-08
ENSG00000254912	MPHOSPH10P2	Transcribed unprocessed pseudogene	2.31469	5.09667	0.0003392	0.00329327
ENSG00000187678	SPRY4	protein_coding	110.069	5.09647	1.17941e-07	5.03265e-06
ENSG00000265107	GJA5	protein_coding	2.96472	5.08819	0.000287139	0.00288205
ENSG00000149451	ADAM33	protein_coding	13.9009	5.08712	5.2517e-06	0.00011114
ENSG00000171345	KRT19	protein_coding	1940.83	5.0868	0.000118914	0.0014046
ENSG00000102445	RUBCNL	protein_coding	320.559	5.08351	1.18173e-09	1.20022e-07
ENSG00000090539	CHRD	protein_coding	19.5719	5.08283	8.51213e-05	0.00106924
ENSG00000240231	RPS27P29	protein_coding	39.8738	5.07532	6.88305e-08	3.30104e-06
ENSG00000185551	NR2F2	protein_coding	73.5625	5.0731	2.20018e-07	8.29043e-06
ENSG00000253368	TRNP1	protein_coding	64.2708	5.07252	2.52516e-06	5.97316e-05
ENSG00000120327	PCDHB14	protein_coding	23.3592	5.07113	7.9483e-06	0.000155779
ENSG00000104723	TUSC3	protein_coding	85.5414	5.06833	3.28099e-07	1.12613e-05
ENSG00000280152	NA	TEC	14.2568	5.06792	0.000331851	0.00323688
ENSG00000204052	LRRC73	protein_coding	7.68859	5.06687	1.54126e-05	0.000266343
ENSG00000153823	PID1	protein_coding	73.2344	5.06551	1.99546e-07	7.59302e-06
ENSG00000112799	LY86	protein_coding	58.6534	5.06359	1.23931e-10	2.21303e-08
ENSG00000184113	CLDN5	protein_coding	11.9484	5.05753	9.78494e-05	0.00119116
ENSG00000253304	TMEM200B	protein_coding	36.4332	5.05753	1.08176e-05	0.000198486
ENSG00000184905	TCEAL2	protein_coding	3.09612	5.05568	2.1387e-05	0.000348014
ENSG00000154639	CXADR	protein_coding	230.243	5.04736	1.8194e-11	4.64558e-09
CABG_008282	NA	LncRNA	2.21901	5.04611	0.000521081	0.0046631
ENSG00000143067	ZNF697	protein_coding	79.4349	5.04283	3.13893e-07	1.08418e-05
ENSG00000122176	FMOD	protein_coding	58.5154	5.04181	2.38454e-08	1.37443e-06
ENSG00000106066	CPVL	protein_coding	76.8795	5.04176	3.40441e-07	1.16518e-05
ENSG00000173918	C1QTNF1	protein_coding	285.658	5.04068	7.44064e-06	0.00014786
ENSG00000008441	NFIX	protein_coding	370.178	5.04052	1.12305e-12	4.44679e-10
ENSG00000171992	SYNPO	protein_coding	341.233	5.03818	6.17921e-10	7.40596e-08
ENSG00000152527	PLEKHH2	protein_coding	63.9043	5.03512	2.55844e-09	2.29178e-07
ENSG00000071967	CYBRD1	protein_coding	893.682	5.03331	5.61286e-09	4.33189e-07
ENSG00000169515	CCDC8	protein_coding	5.8034	5.03197	0.00045602	0.00417664
ENSG00000164181	ELOVL7	protein_coding	199.349	5.03005	2.05833e-07	7.79967e-06
ENSG00000156140	ADAMTS3	protein_coding	95.1456	5.02954	1.69898e-08	1.06463e-06
ENSG00000132464	ENAM	protein_coding	6.35118	5.02117	0.000217447	0.00228935
ENSG00000100181	TPTEP1	protein_coding	29.9445	5.01992	1.31759e-06	3.48479e-05
ENSG00000135917	SLC19A3	protein_coding	19.1948	5.0183	8.58279e-05	0.00107614
ENSG00000074047	GLI2	protein_coding	31.323	5.01774	3.35656e-05	0.000503595
ENSG00000172139	SLC9C1	protein_coding	7.08605	5.01612	0.000383262	0.00362572
ENSG00000111961	SASH1	protein_coding	111.408	5.01183	7.51408e-11	1.46637e-08
ENSG00000102802	MEDAG	protein_coding	162.387	5.00855	7.7936e-10	8.90916e-08
ENSG00000279447	NA	TEC	4.37384	5.00788	0.000878998	0.00707158
ENSG00000133083	DCLK1	protein_coding	20.7251	5.0057	8.07476e-06	0.000157917
ENSG00000145040	UCN2	protein_coding	2.70629	5.00469	0.000388785	0.00366908
ENSG00000205056	LINC02397	LncRNA	28.5017	5.00294	7.87588e-08	3.68519e-06
ENSG00000128218	VPREB3	protein_coding	28.0773	4.98778	5.58931e-09	4.32594e-07
ENSG00000235621	LINC00494	LncRNA	17.4035	4.98679	5.13355e-05	0.000709936
ENSG00000205362	MT1A	protein_coding	5.02837	4.9834	0.000322693	0.00316223
ENSG00000243711	RPL21P116	protein_coding	6.35425	4.98142	9.05428e-05	0.00112238
ENSG00000277435	NA	Processed pseudogene	4.77269	4.97912	2.19275e-05	0.000355538
ENSG00000139970	RTN1	protein_coding	18.0959	4.97656	2.45753e-06	5.84614e-05
ENSG00000101443	WFDC2	protein_coding	125.454	4.97109	3.79744e-05	0.000558696
ENSG00000249007	NA	LncRNA	2.83589	4.96784	0.00121371	0.0091073
ENSG00000182916	TCEAL7	protein_coding	3.81772	4.96494	0.000165536	0.0018407
ENSG00000236533	RPS12P4	protein_coding	5.5998	4.96449	0.00123593	0.00924107
ENSG00000159403	C1R	protein_coding	1642.83	4.96442	3.35801e-09	2.93112e-07
ENSG00000167483	NIBAN3	protein_coding	330.636	4.96299	2.21252e-10	3.51443e-08
ENSG00000120328	PCDHB12	protein_coding	4.0697	4.96242	0.000146488	0.00167448
ENSG00000166592	RRAD	protein_coding	248.778	4.95112	9.87228e-10	1.06915e-07
ENSG00000149596	JPH2	protein_coding	7.32795	4.94948	1.51929e-05	0.000263714
ENSG00000117791	MTARC2	protein_coding	12.6577	4.94316	2.91971e-07	1.03061e-05
ENSG00000137693	YAP1	protein_coding	286.034	4.94301	2.02736e-08	1.21342e-06
ENSG00000204442	NALF1	protein_coding	2.73268	4.94053	0.000452467	0.00414967
INGMG_lincRNAs_TIL_001782	NA	LncRNA	11.0268	4.9397	8.3382e-05	0.00105467
ENSG00000121900	TMEM54	protein_coding	27.0512	4.93737	4.07166e-05	0.000589979
ENSG00000183779	ZNF703	protein_coding	98.2553	4.93458	1.25014e-13	8.33048e-11
ENSG00000266891	RPL27A pseudogene	Processed pseudogene	2.62987	4.93357	0.000576794	0.00503952
ENSG00000138639	ARHGAP24	protein_coding	83.9817	4.93298	2.34862e-09	2.13178e-07
ENSG00000137273	FOXF2	protein_coding	9.80514	4.93073	0.000960276	0.00757956
ENSG00000163673	DCLK3	protein_coding	4.3246	4.93065	7.68263e-05	0.000984046
ENSG00000166450	PRTG	protein_coding	7.04283	4.92582	0.000239626	0.00247577
ENSG00000236846	NA	LncRNA	4.89998	4.92431	8.02131e-05	0.00102025
ENSG00000170412	GPRC5C	protein_coding	39.1445	4.92273	1.33089e-07	5.46786e-06
ENSG00000186081	KRT5	protein_coding	1518.69	4.92256	0.000268682	0.00272078
ENSG00000211593	IGKJ5	protein_coding	14.0445	4.91578	5.60577e-05	0.000762726
ENSG00000164287	CDC20B	protein_coding	3.97941	4.91531	0.00061129	0.00527513
ENSG00000197385	ZNF860	protein_coding	23.6801	4.91047	2.38571e-06	5.69756e-05
INGMG_001658	NA	LncRNA	7.1019	4.90503	8.5687e-06	0.000165095
ENSG00000176490	DIRAS1	protein_coding	61.6034	4.90014	1.11643e-09	1.15538e-07
ENSG00000131477	RAMP2	protein_coding	3.89765	4.8942	0.000647405	0.0055366
ENSG00000143226	FCGR2A	protein_coding	353.076	4.88868	1.81017e-09	1.71127e-07
INGMG_001762	NA	LncRNA	17.8257	4.88523	0.000528003	0.00471424
ENSG00000203710	CR1	protein_coding	58.122	4.87925	3.46918e-08	1.88354e-06
ENSG00000105290	APLP1	protein_coding	86.0972	4.87777	1.76116e-07	6.87383e-06
ENSG00000213750	RPS2 pseudogene	Processed pseudogene	6.52342	4.87601	0.000408683	0.0038108
ENSG00000234513	RPS26 pseudogene	Processed pseudogene	19.7238	4.87503	5.03296e-05	0.000700129
ENSG00000179241	LDLRAD3	protein_coding	32.3696	4.87032	3.85296e-08	2.04401e-06
ENSG00000229605	RPL21P93	protein_coding	20.4355	4.86884	1.98111e-07	7.54896e-06
ENSG00000272512	NA	LncRNA	46.047	4.86783	1.19569e-05	0.000215626
ENSG00000196639	HRH1	protein_coding	118.745	4.86534	1.01153e-08	7.01419e-07
ENSG00000176697	BDNF	protein_coding	50.3135	4.86179	7.39131e-08	3.49374e-06
ENSG00000253161	LINC01605	LncRNA	2.18921	4.86138	0.000708762	0.00599137
ENSG00000157240	FZD1	protein_coding	134.298	4.86113	5.79534e-11	1.19333e-08
ENSG00000223949	ROR1-AS1	LncRNA	5.05273	4.85764	0.000365758	0.00349401
ENSG00000169435	RASSF6	protein_coding	128.863	4.85444	2.47339e-08	1.41668e-06
ENSG00000126603	GLIS2	protein_coding	55.74	4.85005	3.96364e-08	2.08652e-06
ENSG00000166033	HTRA1	protein_coding	517.381	4.84944	7.87728e-08	3.68519e-06
ENSG00000248187	NA	LncRNA	3.01026	4.84729	0.000156256	0.00175899
ENSG00000166342	NETO1	protein_coding	18.8503	4.84614	9.92222e-06	0.000184537
ENSG00000115183	TANC1	protein_coding	158.98	4.84513	7.97859e-08	3.72621e-06
ENSG00000162627	SNX7	protein_coding	32.1023	4.84364	1.53131e-05	0.000265294
ENSG00000179431	FJX1	protein_coding	26.4627	4.84236	2.48899e-07	9.1033e-06
ENSG00000166831	RBPMS2	protein_coding	11.8612	4.84218	6.82431e-06	0.000137803
ENSG00000174099	MSRB3	protein_coding	32.0125	4.83762	2.27462e-07	8.52467e-06
ENSG00000113083	LOX	protein_coding	333.513	4.83197	7.17066e-12	2.12945e-09
ENSG00000258895	PABPC1 pseudogene	Processed pseudogene	12.237	4.83096	1.31102e-06	3.47752e-05
ENSG00000151718	WWC2	protein_coding	172.908	4.82765	3.44218e-11	7.77285e-09
ENSG00000106078	COBL	protein_coding	114.348	4.82654	3.56173e-08	1.92312e-06
CATG00000099667	NA	LncRNA	3.5336	4.82284	0.000889737	0.00714746
ENSG00000179674	ARL14	protein_coding	8.03605	4.82278	0.000875734	0.00705195
ENSG00000112852	PCDHB2	protein_coding	6.54107	4.82212	0.00131351	0.00971478
ENSG00000170456	DENND5B	protein_coding	177.947	4.82074	1.25355e-10	2.21894e-08
ENSG00000162520	SYNC	protein_coding	5.6258	4.81638	0.000845529	0.00685278
CABG_013570	NA	LncRNA	12.6368	4.81479	2.84675e-05	0.000440658
INGMG_001479	NA	LncRNA	3.70357	4.81458	1.05943e-05	0.000194521
ENSG00000152583	SPARCL1	protein_coding	141.63	4.81299	4.15531e-08	2.17903e-06
ENSG00000082293	COL19A1	protein_coding	32.6699	4.81138	2.66505e-06	6.23924e-05
ENSG00000130962	PRRG1	protein_coding	14.1206	4.81017	9.03975e-06	0.000171868
ENSG00000156427	FGF18	protein_coding	29.0586	4.80722	1.18259e-07	5.03265e-06
ENSG00000134545	KLRC1	protein_coding	70.7034	4.80474	8.80112e-07	2.52098e-05
ENSG00000175445	LPL	protein_coding	39.1146	4.80431	1.72694e-12	6.37592e-10
ENSG00000152078	TLCD4	protein_coding	32.2907	4.80314	4.42436e-08	2.2843e-06
ENSG00000175592	FOSL1	protein_coding	329.62	4.79745	2.40528e-09	2.1688e-07
ENSG00000169855	ROBO1	protein_coding	72.5403	4.79591	1.2891e-07	5.334e-06
ENSG00000181085	MAPK15	protein_coding	8.55677	4.7933	0.000256037	0.0026121
ENSG00000137177	KIF13A	protein_coding	260.004	4.79249	4.24467e-11	9.20386e-09
ENSG00000153071	DAB2	protein_coding	427.897	4.79146	3.88176e-08	2.05149e-06
CABG_013994	NA	LncRNA	17.5339	4.79057	1.01128e-08	7.01419e-07
ENSG00000171049	FPR2	protein_coding	32.789	4.78916	8.61724e-06	0.000165396
ENSG00000250899	NA	LncRNA	15.3872	4.78856	0.00015967	0.00178908
ENSG00000183298	RPSAP19	protein_coding	124.838	4.78495	5.58506e-09	4.32594e-07
ENSG00000182621	PLCB1	protein_coding	170.226	4.78105	2.88032e-07	1.02332e-05
ENSG00000154065	ANKRD29	protein_coding	15.3091	4.77946	8.2597e-06	0.000160045
ENSG00000139438	FAM222A	protein_coding	74.8227	4.77523	3.66418e-09	3.09341e-07
ENSG00000204103	MAFB	protein_coding	254.847	4.77466	2.50373e-09	2.25014e-07
ENSG00000164741	DLC1	protein_coding	101.683	4.77442	7.94955e-09	5.82278e-07
ENSG00000126262	FFAR2	protein_coding	8.71783	4.77411	0.000145582	0.0016656
ENSG00000153064	BANK1	protein_coding	328.89	4.7727	2.53821e-08	1.44472e-06
ENSG00000103528	SYT17	protein_coding	33.6847	4.77186	5.83713e-07	1.80804e-05
ENSG00000182885	ADGRG3	protein_coding	107.223	4.77063	4.66171e-06	0.000100049
ENSG00000230709	NA	LncRNA	10.5702	4.76242	4.29812e-05	0.000616425
ENSG00000101439	CST3	protein_coding	425.495	4.76061	8.66321e-09	6.19601e-07
ENSG00000176728	TTTY14	protein_coding	2.36919	4.75024	0.000204682	0.00217592
ENSG00000251442	LINC01094	LncRNA	19.0788	4.74604	9.03739e-05	0.00112125
ENSG00000095303	PTGS1	protein_coding	388.695	4.74518	8.75793e-12	2.47146e-09
ENSG00000163638	ADAMTS9	protein_coding	37.495	4.74361	1.51466e-08	9.69136e-07
ENSG00000111452	ADGRD1	protein_coding	59.6671	4.74304	3.07146e-07	1.07172e-05
ENSG00000196092	PAX5	protein_coding	378.147	4.74297	3.52804e-07	1.19293e-05
ENSG00000161647	MPP3	protein_coding	25.4931	4.74218	2.45863e-06	5.84614e-05
ENSG00000215007	DNAJA1P3	protein_coding	24.5575	4.74151	2.48894e-05	0.000396272
ENSG00000117245	KIF17	protein_coding	8.34548	4.73666	3.4634e-05	0.000517341
ENSG00000243071	RPL21P98	protein_coding	31.1521	4.73662	7.85167e-07	2.3091e-05
ENSG00000232187	FTH1P7	protein_coding	53.2525	4.7357	6.2917e-10	7.44137e-08
ENSG00000205420	KRT6A	protein_coding	178.153	4.73332	0.00116057	0.0087907
ENSG00000223592	FNDC3CP	protein_coding	8.13821	4.72221	0.000738032	0.00617007
ENSG00000062370	ZNF112	protein_coding	9.62856	4.71689	1.57934e-06	4.02511e-05
ENSG00000228974	S100A11 pseudogene	Processed pseudogene	4.20935	4.71452	0.000641617	0.00550484
ENSG00000100979	PLTP	protein_coding	422.13	4.70876	2.12993e-08	1.25684e-06
ENSG00000095739	BAMBI	protein_coding	57.9167	4.70717	5.98143e-07	1.84445e-05
ENSG00000197872	CYRIA	protein_coding	347.293	4.70685	4.68584e-09	3.75048e-07
ENSG00000060656	PTPRU	protein_coding	126.607	4.70545	1.87607e-06	4.66389e-05
ENSG00000150630	VEGFC	protein_coding	46.9925	4.70332	2.49065e-06	5.90685e-05
ENSG00000240392	RPL9P3	protein_coding	44.8743	4.70235	2.20441e-08	1.29033e-06
ENSG00000154277	UCHL1	protein_coding	146.151	4.69576	5.42048e-06	0.000114181
ENSG00000157368	IL34	protein_coding	10.3647	4.69403	0.000122974	0.00144444
ENSG00000233971	RPS20P10	protein_coding	4.7263	4.69144	2.81489e-05	0.000436715
ENSG00000108342	CSF3	protein_coding	40.4537	4.68956	1.01551e-05	0.000187846
ENSG00000073712	FERMT2	protein_coding	283.795	4.68873	1.46917e-11	3.85953e-09
ENSG00000177425	PAWR	protein_coding	508.094	4.68644	6.78167e-13	3.03741e-10
ENSG00000197279	ZNF165	protein_coding	168.955	4.68595	1.58842e-08	1.00781e-06
ENSG00000145623	OSMR	protein_coding	951.554	4.68589	2.81985e-08	1.57548e-06
ENSG00000121440	PDZRN3	protein_coding	17.9074	4.68478	0.000142162	0.00163125
ENSG00000109436	TBC1D9	protein_coding	618.977	4.68345	2.55012e-12	8.93227e-10
ENSG00000156103	MMP16	protein_coding	12.0715	4.68278	0.000373893	0.00355556
ENSG00000118508	RAB32	protein_coding	95.7284	4.68256	5.82846e-09	4.46049e-07
ENSG00000101955	SRPX	protein_coding	11.2593	4.68062	3.18469e-06	7.21468e-05
ENSG00000123384	LRP1	protein_coding	1495.25	4.67785	3.47434e-11	7.77285e-09
ENSG00000239344	RPS6 pseudogene	Processed pseudogene	4.0495	4.67742	0.000305427	0.00302888
ENSG00000152503	TRIM36	protein_coding	39.228	4.6768	5.188e-06	0.000110133
ENSG00000279663	NA	TEC	5.58476	4.67609	0.000967568	0.00762253
ENSG00000147488	ST18	protein_coding	2.26239	4.67268	0.000403547	0.00376676
ENSG00000237927	NA	LncRNA	46.4191	4.6716	1.87705e-08	1.14984e-06
ENSG00000171246	NPTX1	protein_coding	60.9778	4.66687	2.0926e-06	5.08648e-05
ENSG00000105976	MET	protein_coding	776.323	4.66192	8.20669e-05	0.00103996
ENSG00000146938	NLGN4X	protein_coding	6.42574	4.66077	0.000163846	0.00182637
ENSG00000179331	RAB39A	protein_coding	14.9216	4.6603	9.91661e-07	2.78164e-05
ENSG00000198576	ARC	protein_coding	83.0608	4.66009	5.62967e-10	6.95965e-08
ENSG00000144645	OSBPL10	protein_coding	221.785	4.6584	8.02611e-11	1.54423e-08
ENSG00000185052	SLC24A3	protein_coding	25.5924	4.65794	0.00015809	0.00177598
ENSG00000165076	PRSS37	protein_coding	6.53693	4.65756	0.000233672	0.00242651
ENSG00000163071	SPATA18	protein_coding	19.5238	4.6552	6.5995e-06	0.000134056
ENSG00000274092	IL4R-AS	LncRNA	6.03582	4.65501	0.00132674	0.00979938
ENSG00000178726	THBD	protein_coding	386.069	4.64644	2.12166e-08	1.25467e-06
ENSG00000179277	MEIS3P1	protein_coding	5.97234	4.64568	0.000739148	0.00617372
ENSG00000243680	RPL37P23	protein_coding	22.0215	4.64307	8.10453e-08	3.77213e-06
ENSG00000102595	UGGT2	protein_coding	60.8346	4.64292	3.07347e-10	4.44287e-08
ENSG00000003137	CYP26B1	protein_coding	29.9346	4.63673	1.96544e-05	0.000325836
ENSG00000235828	RPL36AP26	protein_coding	25.24	4.63573	5.15858e-08	2.59077e-06
ENSG00000118432	CNR1	protein_coding	88.6579	4.63279	1.04761e-08	7.22773e-07
ENSG00000234785	EEF1GP5	protein_coding	34.5168	4.63243	1.30209e-06	3.46054e-05
ENSG00000169783	LINGO1	protein_coding	9.22494	4.62966	0.00047441	0.0043147
ENSG00000119535	CSF3R	protein_coding	79.0727	4.62781	6.17806e-06	0.000127389
ENSG00000230721	RPL17P5	protein_coding	6.84822	4.62563	0.000257052	0.00262147
ENSG00000129946	SHC2	protein_coding	61.2708	4.62084	4.89253e-07	1.56155e-05
ENSG00000178031	ADAMTSL1	protein_coding	7.62104	4.62079	0.000238876	0.00247209
ENSG00000219891	ZSCAN12P1	protein_coding	42.4727	4.61962	7.42097e-08	3.5017e-06
ENSG00000132561	MATN2	protein_coding	110.859	4.61661	4.33911e-10	5.727e-08
ENSG00000186205	MTARC1	protein_coding	11.4938	4.61551	2.66544e-05	0.00041804
ENSG00000180730	SHISA2	protein_coding	11.2795	4.61372	0.000484726	0.00438952
ENSG00000239998	LILRA2	protein_coding	4.16006	4.61226	0.000428017	0.00396752
ENSG00000164619	BMPER	protein_coding	18.4593	4.61087	5.73415e-05	0.000775941
ENSG00000163132	MSX1	protein_coding	43.5729	4.60727	1.23771e-05	0.000222032
ENSG00000178343	SHISA3	protein_coding	8.54185	4.60476	8.82819e-06	0.000168668
ENSG00000218980	FTH1P15	protein_coding	8.46453	4.60461	0.00039889	0.00373606
ENSG00000184226	PCDH9	protein_coding	21.3386	4.60357	1.68844e-05	0.000287056
ENSG00000103723	AP3B2	protein_coding	14.2051	4.60114	2.49238e-10	3.82302e-08
ENSG00000265519	NA	LncRNA	4.76194	4.59972	0.000359565	0.00345068
ENSG00000091656	ZFHX4	protein_coding	84.4768	4.59923	9.43057e-06	0.000177203
INGMG_002393	NA	LncRNA	2.33804	4.59648	0.000698158	0.0059127
ENSG00000162692	VCAM1	protein_coding	137.539	4.59426	2.94861e-10	4.30796e-08
ENSG00000253506	NACA2	protein_coding	31.162	4.59346	2.68658e-07	9.63255e-06
ENSG00000128886	ELL3	protein_coding	5.40469	4.59112	0.000712979	0.00601213
ENSG00000258947	TUBB3	protein_coding	8.74155	4.59095	0.000165262	0.0018384
ENSG00000072694	FCGR2B	protein_coding	121.697	4.58683	8.91718e-11	1.69185e-08
ENSG00000137727	ARHGAP20	protein_coding	28.3078	4.58546	2.63268e-05	0.000413852
ENSG00000254415	SIGLEC14	protein_coding	26.0389	4.5823	9.93703e-07	2.78324e-05
ENSG00000148204	CRB2	protein_coding	53.1257	4.57923	2.32652e-09	2.12585e-07
ENSG00000167850	CD300C	protein_coding	31.7239	4.57873	3.62698e-07	1.21736e-05
ENSG00000253701	NA	LncRNA	18.333	4.57768	5.44975e-08	2.72199e-06
ENSG00000227449	FGF7P6	protein_coding	9.81968	4.57739	0.00030446	0.00302273
ENSG00000104112	SCG3	protein_coding	14.6823	4.57298	0.000119859	0.001412
CATG00000044833	NA	LncRNA	8.56393	4.57291	0.000233306	0.00242363
ENSG00000118523	CCN2	protein_coding	290.206	4.57133	0.000357923	0.00344023
ENSG00000182247	UBE2E2	protein_coding	83.8425	4.56761	4.09746e-25	5.59734e-21
ENSG00000276085	CCL3L3	protein_coding	20.5243	4.56494	9.5369e-05	0.00116842
ENSG00000099260	PALMD	protein_coding	17.2903	4.56368	0.00128892	0.00955623
ENSG00000240864	IGKV1-16	IG V gene	12.5695	4.56336	0.000867834	0.00699825
ENSG00000236312	RPL34P34	protein_coding	53.4739	4.55502	3.72285e-10	5.08587e-08
ENSG00000163975	MELTF	protein_coding	406.572	4.55157	4.43845e-08	2.2843e-06
ENSG00000180263	FGD6	protein_coding	351.299	4.54356	7.41694e-09	5.50648e-07
ENSG00000135218	CD36	protein_coding	49.9407	4.54281	9.47557e-08	4.24967e-06
ENSG00000054598	FOXC1	protein_coding	142.952	4.5419	6.88699e-08	3.30104e-06
ENSG00000129538	RNASE1	protein_coding	468.174	4.54098	3.49519e-05	0.00052153
ENSG00000172986	GXYLT2	protein_coding	21.9145	4.53992	3.74252e-05	0.000551804
ENSG00000105989	WNT2	protein_coding	4.15367	4.53924	0.000910647	0.00728544
ENSG00000145632	PLK2	protein_coding	708.297	4.53209	6.66864e-09	5.04693e-07
ENSG00000259838	ELOCP2	protein_coding	14.1687	4.53015	0.000176456	0.00193612
ENSG00000100504	PYGL	protein_coding	136.819	4.52997	1.47787e-07	5.94651e-06
ENSG00000228007	RPL36AP7	protein_coding	19.7933	4.52871	1.8515e-06	4.6112e-05
INGMG_lincRNAs_TIL_001851	NA	LncRNA	14.6943	4.52846	2.433e-06	5.8054e-05
ENSG00000136378	ADAMTS7	protein_coding	104.744	4.52534	7.815e-08	3.66862e-06
ENSG00000172379	ARNT2	protein_coding	21.5932	4.52298	9.20206e-08	4.13503e-06
ENSG00000120324	PCDHB10	protein_coding	12.6875	4.51927	0.000348289	0.00336359
ENSG00000198857	HSD3BP5	protein_coding	4.08838	4.51835	0.000987739	0.0077457
ENSG00000154447	SH3RF1	protein_coding	92.3371	4.51735	3.1199e-07	1.07897e-05
ENSG00000142156	COL6A1	protein_coding	808.219	4.51549	1.06789e-15	1.82348e-12
ENSG00000261786	NA	LncRNA	8.9128	4.51292	0.000287876	0.00288727
ENSG00000131941	RHPN2	protein_coding	132.171	4.51256	6.21457e-10	7.40596e-08
ENSG00000119946	CNNM1	protein_coding	7.79539	4.50959	0.000634441	0.00544802
ENSG00000186340	THBS2	protein_coding	295.503	4.50412	4.7393e-07	1.51975e-05
ENSG00000175264	CHST1	protein_coding	4.06437	4.49793	0.000923154	0.00737255
ENSG00000260196	NA	LncRNA	54.1896	4.49484	9.48925e-09	6.64759e-07
ENSG00000272674	PCDHB16	protein_coding	8.28631	4.49367	0.00059695	0.00518743
ENSG00000184185	KCNJ12	protein_coding	7.57191	4.48958	0.000542119	0.00481041
ENSG00000106366	SERPINE1	protein_coding	892.254	4.48248	6.671e-08	3.22011e-06
ENSG00000227887	RPS26P13	protein_coding	15.7553	4.47867	1.51134e-05	0.000262668
ENSG00000141738	GRB7	protein_coding	84.1924	4.47716	8.03683e-07	2.34346e-05
ENSG00000237149	ZNF503-AS2	LncRNA	8.84683	4.47621	0.00046921	0.0042731
ENSG00000012124	CD22	protein_coding	277.244	4.47566	4.75872e-07	1.52301e-05
ENSG00000158270	COLEC12	protein_coding	45.8311	4.47484	5.52719e-08	2.75061e-06
ENSG00000168952	STXBP6	protein_coding	14.7999	4.46736	0.000139112	0.00160343
ENSG00000227854	RPL39 pseudogene	LncRNA	3.8623	4.46345	0.000317834	0.0031247
ENSG00000164023	SGMS2	protein_coding	169.512	4.46133	5.99566e-06	0.000124474
ENSG00000164904	ALDH7A1	protein_coding	36.568	4.46043	2.8177e-08	1.57548e-06
ENSG00000132470	ITGB4	protein_coding	566.962	4.45936	2.83179e-06	6.56212e-05
ENSG00000156738	MS4A1	protein_coding	784.479	4.45629	9.14698e-08	4.11705e-06
ENSG00000013588	GPRC5A	protein_coding	1104.4	4.45551	2.97474e-06	6.80677e-05
ENSG00000153132	CLGN	protein_coding	8.97162	4.44932	0.000862699	0.00696713
ENSG00000230615	NA	LncRNA	16.3629	4.44924	4.21903e-05	0.000606993
ENSG00000162772	ATF3	protein_coding	1325.92	4.44653	1.88899e-07	7.283e-06
ENSG00000185215	TNFAIP2	protein_coding	1673.01	4.44633	5.57263e-07	1.74199e-05
CABG_004673	NA	LncRNA	4.26807	4.44485	0.00114415	0.00870003
ENSG00000162551	ALPL	protein_coding	18.3551	4.44304	1.3154e-06	3.48237e-05
ENSG00000148426	PROSER2	protein_coding	24.9747	4.43696	2.77154e-06	6.44986e-05
ENSG00000138685	FGF2	protein_coding	143.814	4.43188	8.36537e-08	3.86682e-06
ENSG00000135363	LMO2	protein_coding	64.1132	4.43186	6.91101e-07	2.07718e-05
ENSG00000205726	ITSN1	protein_coding	305.393	4.43184	6.26057e-11	1.267e-08
ENSG00000183421	RIPK4	protein_coding	42.453	4.428	1.36321e-06	3.58118e-05
ENSG00000170891	CYTL1	protein_coding	6.83192	4.42518	0.00114953	0.00873608
ENSG00000117152	RGS4	protein_coding	14.9642	4.42133	8.49057e-06	0.000163706
ENSG00000267707	CELF4-AS	LncRNA	6.41525	4.42125	0.00117651	0.00888919
ENSG00000006327	TNFRSF12A	protein_coding	443.336	4.4196	3.23895e-11	7.62856e-09
ENSG00000196739	COL27A1	protein_coding	195.182	4.41844	2.45424e-07	9.01242e-06
ENSG00000230795	HLA-K	protein_coding	17.4964	4.41759	2.81004e-05	0.000436211
ENSG00000100721	TCL1A	protein_coding	41.8504	4.41757	0.0001851	0.0020172
ENSG00000188064	WNT7B	protein_coding	51.7182	4.41669	3.51028e-05	0.000523209
ENSG00000136158	SPRY2	protein_coding	81.4234	4.41669	8.88528e-09	6.28899e-07
ENSG00000110042	DTX4	protein_coding	200.745	4.41333	3.63366e-09	3.08528e-07
ENSG00000243829	RPS9 pseudogene	LncRNA	214.505	4.41177	1.6965e-09	1.60937e-07
ENSG00000135862	LAMC1	protein_coding	532.869	4.4112	9.15868e-09	6.46575e-07
ENSG00000130208	APOC1	protein_coding	24.2223	4.41008	3.66439e-05	0.000542993
ENSG00000173369	C1QB	protein_coding	366.162	4.40998	5.27473e-07	1.67766e-05
ENSG00000164647	STEAP1	protein_coding	44.3026	4.39668	7.80699e-06	0.000153339
ENSG00000141391	PRELID3A	protein_coding	11.006	4.39664	1.00985e-09	1.08196e-07
ENSG00000162458	FBLIM1	protein_coding	112.032	4.39287	2.3112e-07	8.6368e-06
ENSG00000124343	XG	protein_coding	5.94861	4.38948	0.000957129	0.00755991
ENSG00000172901	LVRN	protein_coding	27.2721	4.38837	5.43713e-06	0.000114356
ENSG00000129595	EPB41L4A	protein_coding	35.7248	4.38798	5.89204e-09	4.49655e-07
ENSG00000167994	RAB3IL1	protein_coding	14.9197	4.38741	2.91587e-06	6.71114e-05
ENSG00000122733	PHF24	protein_coding	7.04662	4.38388	0.000221259	0.00232143
ENSG00000080031	PTPRH	protein_coding	54.3307	4.38216	1.46035e-06	3.78773e-05
ENSG00000219133	RPL21P19	protein_coding	29.5033	4.37922	4.44804e-08	2.2843e-06
ENSG00000187912	CLEC17A	protein_coding	112.248	4.37628	1.38243e-06	3.61933e-05
ENSG00000224839	RPL12P17	protein_coding	26.8169	4.3747	6.56337e-06	0.000133683
ENSG00000130508	PXDN	protein_coding	227.981	4.37423	3.25909e-06	7.35273e-05
ENSG00000164692	COL1A2	protein_coding	704.35	4.36956	1.04715e-07	4.57747e-06
ENSG00000239559	RPL37P2	protein_coding	27.2526	4.36742	7.76202e-07	2.29509e-05
ENSG00000243175	RPSAP36	protein_coding	4.15912	4.36482	0.000359601	0.00345068
ENSG00000232177	MTND4P24	protein_coding	8.37277	4.36199	0.00032687	0.00319629
ENSG00000204472	AIF1	protein_coding	103.499	4.36073	2.70547e-09	2.40819e-07
ENSG00000250519	NA	LncRNA	6.52186	4.36043	0.000202826	0.00216546
ENSG00000182853	VMO1	protein_coding	41.0477	4.36002	2.72701e-07	9.74674e-06
ENSG00000173372	C1QA	protein_coding	423.814	4.35898	5.04612e-06	0.000107372
ENSG00000273472	NA	LncRNA	16.1983	4.35876	1.11691e-06	3.0604e-05
ENSG00000142149	HUNK	protein_coding	11.5736	4.35706	3.01129e-05	0.000461681
ENSG00000113657	DPYSL3	protein_coding	87.3819	4.35638	4.42464e-11	9.44419e-09
ENSG00000105971	CAV2	protein_coding	98.2913	4.35253	8.02298e-07	2.34346e-05
ENSG00000281383	NA	LncRNA	9.64365	4.35021	1.92887e-06	4.76911e-05
ENSG00000266563	EIF1P5	protein_coding	20.5544	4.34814	0.000301816	0.00300178
ENSG00000139329	LUM	protein_coding	79.1955	4.34745	3.12828e-06	7.10456e-05
ENSG00000138207	RBP4	protein_coding	7.25388	4.34456	0.00120796	0.00907662
ENSG00000163273	NPPC	protein_coding	7.17463	4.34398	0.000504314	0.00453921
ENSG00000074416	MGLL	protein_coding	443.349	4.34284	9.72363e-08	4.32638e-06
ENSG00000069011	PITX1	protein_coding	34.11	4.34235	0.000171028	0.00189222
ENSG00000130558	OLFM1	protein_coding	43.2652	4.34046	8.70753e-05	0.00108679
INGMG_lincRNAs_TIL_001976	NA	LncRNA	5.25725	4.33908	0.00131122	0.00970049
ENSG00000163884	KLF15	protein_coding	2.26763	4.33626	0.000454319	0.00416386
ENSG00000257335	MGAM	protein_coding	8.56064	4.33398	1.23574e-07	5.17022e-06
ENSG00000165025	SYK	protein_coding	377.604	4.33269	3.22654e-10	4.61531e-08
ENSG00000110077	MS4A6A	protein_coding	122.83	4.33212	3.08281e-08	1.68789e-06
ENSG00000128512	DOCK4	protein_coding	249.626	4.33101	1.39019e-08	8.97906e-07
ENSG00000105967	TFEC	protein_coding	266.112	4.32704	8.22396e-08	3.80825e-06
ENSG00000196517	SLC6A9	protein_coding	149.888	4.32595	1.77506e-08	1.10474e-06
INGMG_002033	NA	LncRNA	2.98672	4.32045	0.000584344	0.00510059
ENSG00000117519	CNN3	protein_coding	338.038	4.31242	2.51411e-08	1.43399e-06
ENSG00000244716	RPL17P7	protein_coding	281.856	4.31082	4.4197e-11	9.44419e-09
INGMG_lincRNAs_TIL_001891	NA	LncRNA	9.93581	4.30956	0.000483713	0.00438302
ENSG00000224020	MIR181A2HG	LncRNA	3.3165	4.30783	0.000177938	0.00194785
ENSG00000163625	WDFY3	protein_coding	187.709	4.30683	2.56325e-07	9.27558e-06
ENSG00000076356	PLXNA2	protein_coding	71.1983	4.30347	7.82094e-07	2.30254e-05
ENSG00000149564	ESAM	protein_coding	64.1425	4.30122	2.51832e-07	9.16153e-06
ENSG00000116096	SPR	protein_coding	94.8628	4.29412	3.54532e-07	1.19582e-05
ENSG00000283652	NA	LncRNA	112.036	4.29358	8.15859e-06	0.000158761
ENSG00000108821	COL1A1	protein_coding	1214.66	4.29326	2.19341e-13	1.30274e-10
ENSG00000224137	LINC01857	LncRNA	4.47148	4.29293	2.91821e-06	6.71114e-05
ENSG00000082781	ITGB5	protein_coding	327.845	4.29171	8.38258e-09	6.04276e-07
ENSG00000176014	TUBB6	protein_coding	424.104	4.28764	5.26473e-10	6.62846e-08
ENSG00000203747	FCGR3A	protein_coding	341.213	4.28511	1.25255e-07	5.22458e-06
ENSG00000117707	PROX1	protein_coding	17.4712	4.28379	7.96591e-06	0.000156012
ENSG00000136630	HLX	protein_coding	43.9324	4.27823	4.69479e-09	3.75048e-07
ENSG00000187513	GJA4	protein_coding	8.01925	4.27739	0.000311874	0.00308163
ENSG00000183691	NOG	protein_coding	52.5807	4.27666	1.4695e-07	5.92157e-06
ENSG00000234031	RPS3AP44	protein_coding	8.91753	4.27528	0.00010732	0.00128601
INGMG_000510	NA	LncRNA	5.0992	4.27331	0.000529938	0.00472843
ENSG00000158186	MRAS	protein_coding	69.5616	4.27166	4.66144e-09	3.74574e-07
ENSG00000163734	CXCL3	protein_coding	368.932	4.27043	1.77931e-06	4.46807e-05
ENSG00000116117	PARD3B	protein_coding	22.4012	4.26686	5.49183e-07	1.72264e-05
ENSG00000225216	NRP2-AS1	LncRNA	2.2187	4.26376	0.000574425	0.00502365
ENSG00000165959	CLMN	protein_coding	151.351	4.26357	8.77464e-12	2.47146e-09
ENSG00000171714	ANO5	protein_coding	7.14251	4.26255	0.000721172	0.00605877
ENSG00000136826	KLF4	protein_coding	754.923	4.26191	1.09006e-06	2.99916e-05
ENSG00000132669	RIN2	protein_coding	115.234	4.25467	4.59226e-06	9.87915e-05
INGMG_002038	NA	LncRNA	10.7436	4.25283	0.00058743	0.00512048
ENSG00000197712	FAM114A1	protein_coding	115.479	4.25252	4.88092e-07	1.55967e-05
ENSG00000171766	GATM	protein_coding	55.9445	4.24976	1.33971e-09	1.31952e-07
ENSG00000256356	HSPA8P5	protein_coding	41.4949	4.24526	5.65074e-07	1.76237e-05
ENSG00000213946	DNAJB1P1	protein_coding	16.1391	4.24372	3.00142e-05	0.000460752
ENSG00000131620	ANO1	protein_coding	14.2003	4.24144	0.000753267	0.00627057
ENSG00000205809	KLRC2	protein_coding	24.7982	4.24042	0.000394727	0.0037085
ENSG00000241282	RPL34P33	protein_coding	28.3276	4.23326	5.66455e-06	0.000118409
ENSG00000128849	CGNL1	protein_coding	33.3198	4.23194	0.000222555	0.00232946
ENSG00000168398	BDKRB2	protein_coding	9.63272	4.23024	0.000124217	0.00145716
ENSG00000156966	B3GNT7	protein_coding	165.297	4.22777	8.92266e-08	4.04917e-06
ENSG00000119866	BCL11A	protein_coding	82.4604	4.22694	2.2329e-06	5.36544e-05
ENSG00000261488	TBILA	protein_coding	8.65391	4.22606	3.91114e-05	0.000572342
ENSG00000174370	KCNJ5-AS1	LncRNA	6.5075	4.22362	6.70098e-06	0.000135713
ENSG00000136244	IL6	protein_coding	344.312	4.22147	0.000363081	0.00347452
ENSG00000226777	FAM30A	protein_coding	9.35664	4.22135	0.000602672	0.00522054
ENSG00000113248	PCDHB15	protein_coding	16.3564	4.22093	0.00021769	0.00229103
ENSG00000138622	HCN4	protein_coding	3.56755	4.22041	0.00069207	0.00587206
ENSG00000189410	SH2D5	protein_coding	38.5445	4.21951	3.78984e-06	8.34344e-05
ENSG00000167780	SOAT2	protein_coding	7.67662	4.21473	0.000458805	0.00419792
ENSG00000120256	LRP11	protein_coding	230.077	4.21333	3.47864e-11	7.77285e-09
ENSG00000163687	DNASE1L3	protein_coding	12.1443	4.21211	0.000108208	0.00129608
ENSG00000101670	LIPG	protein_coding	21.3667	4.2108	0.000356284	0.00342868
ENSG00000143867	OSR1	protein_coding	5.24036	4.21068	0.000376238	0.00357289
ENSG00000169252	ADRB2	protein_coding	58.0997	4.21047	2.02784e-09	1.89087e-07
ENSG00000276855	NA	LncRNA	10.8952	4.20949	0.000697677	0.00591046
ENSG00000105501	SIGLEC5	protein_coding	2.70461	4.20859	0.000793573	0.00652262
ENSG00000133424	LARGE1	protein_coding	64.9144	4.19817	5.10708e-09	4.01456e-07
ENSG00000168081	PNOC	protein_coding	11.5617	4.19613	4.01465e-05	0.000584359
ENSG00000211638	IGLV8-61	IG V gene	11.1592	4.19532	0.000650075	0.00555195
ENSG00000112379	ARFGEF3	protein_coding	63.5989	4.19448	6.99267e-06	0.000140579
ENSG00000196730	DAPK1	protein_coding	379.341	4.19366	3.47176e-07	1.17829e-05
ENSG00000232346	RPS17P16	protein_coding	108.892	4.19264	2.00268e-08	1.2044e-06
ENSG00000064309	CDON	protein_coding	132.928	4.19161	5.02808e-08	2.52987e-06
ENSG00000271605	MILR1	protein_coding	29.1336	4.19152	3.05434e-08	1.67903e-06
ENSG00000144724	PTPRG	protein_coding	37.0085	4.18921	1.00707e-07	4.43777e-06
ENSG00000118898	PPL	protein_coding	270.655	4.1887	1.22024e-06	3.28454e-05
ENSG00000175899	A2M	protein_coding	418.075	4.1882	2.42012e-08	1.392e-06
ENSG00000279565	NA	TEC	3.34794	4.18743	0.000162244	0.00181073
ENSG00000173930	SLCO4C1	protein_coding	4.19149	4.18743	0.00109562	0.00839884
ENSG00000189320	FAM180A	protein_coding	5.09193	4.1862	7.4626e-05	0.000963543
ENSG00000048462	TNFRSF17	protein_coding	5.49426	4.18534	0.000468512	0.00426959
ENSG00000176641	RNF152	protein_coding	23.5546	4.18447	5.35777e-07	1.69478e-05
ENSG00000224843	LINC00240	LncRNA	8.94201	4.18291	0.00068571	0.00582534
ENSG00000128805	ARHGAP22	protein_coding	25.4363	4.18215	0.000136477	0.00157616
ENSG00000165124	SVEP1	protein_coding	9.02906	4.18064	0.000119876	0.001412
INGMG_lincRNAs_TIL_000548	NA	LncRNA	8.22487	4.18022	0.000202308	0.00216162
ENSG00000245522	LINC02709	LncRNA	8.80644	4.18002	2.84326e-06	6.58312e-05
ENSG00000137819	PAQR5	protein_coding	17.7032	4.17987	0.000228846	0.00238729
ENSG00000280099	NA	TEC	5.99766	4.17889	4.21527e-05	0.000606772
ENSG00000260317	LINC02986	LncRNA	53.9686	4.17835	1.84992e-08	1.13577e-06
ENSG00000164176	EDIL3	protein_coding	34.0085	4.17564	4.76679e-05	0.00067027
ENSG00000108239	TBC1D12	protein_coding	94.1252	4.17296	1.9761e-08	1.19202e-06
ENSG00000161835	TAMALIN	protein_coding	366.772	4.17289	2.59385e-08	1.46418e-06
ENSG00000244731	C4A	protein_coding	159.319	4.16544	8.84655e-09	6.28899e-07
ENSG00000152990	ADGRA3	protein_coding	41.5136	4.16379	1.18239e-07	5.03265e-06
ENSG00000119698	PPP4R4	protein_coding	3.55898	4.16345	0.000419793	0.00390108
ENSG00000134874	DZIP1	protein_coding	12.655	4.16297	0.00010686	0.00128162
ENSG00000121933	TMIGD3	protein_coding	8.33897	4.1614	0.000970408	0.00763609
ENSG00000110446	SLC15A3	protein_coding	292.147	4.16135	3.02934e-06	6.91432e-05
ENSG00000254087	LYN	protein_coding	774.639	4.16132	3.24636e-10	4.61947e-08
ENSG00000150625	GPM6A	protein_coding	6.25765	4.16109	0.0011731	0.00886838
ENSG00000067715	SYT1	protein_coding	10.0358	4.16064	0.000187857	0.00203749
ENSG00000012779	ALOX5	protein_coding	163.775	4.1574	2.49238e-11	6.02604e-09
ENSG00000217130	RPS10P13	protein_coding	123.518	4.15304	3.61071e-08	1.93808e-06
ENSG00000181143	MUC16	protein_coding	199.943	4.15264	4.14836e-06	9.02368e-05
ENSG00000242952	RPSAP3	protein_coding	11.642	4.15163	3.02273e-05	0.000462981
ENSG00000239470	RPL21P97	protein_coding	14.4372	4.14853	1.53817e-05	0.000265978
ENSG00000248309	MEF2C-AS1	LncRNA	3.89806	4.14136	6.26067e-05	0.00083438
ENSG00000183454	GRIN2A	protein_coding	8.07107	4.13532	0.000568976	0.00498717
ENSG00000115641	FHL2	protein_coding	372.755	4.13463	3.68402e-09	3.09429e-07
ENSG00000177455	CD19	protein_coding	191.514	4.13263	1.9194e-06	4.75431e-05
ENSG00000108511	HOXB6	protein_coding	8.27429	4.12988	0.000983541	0.00772164
ENSG00000168542	COL3A1	protein_coding	894.949	4.12901	1.38558e-06	3.61933e-05
ENSG00000081041	CXCL2	protein_coding	516.862	4.12837	1.14566e-05	0.000207978
ENSG00000092758	COL9A3	protein_coding	67.728	4.12577	2.73139e-05	0.000426669
ENSG00000162496	DHRS3	protein_coding	633.534	4.12558	1.24488e-19	5.66855e-16
ENSG00000102554	KLF5	protein_coding	361.506	4.12197	1.05648e-07	4.6109e-06
ENSG00000102287	GABRE	protein_coding	133.175	4.12194	3.95407e-06	8.66879e-05
ENSG00000244582	RPL21P120	protein_coding	14.1825	4.12162	9.36533e-06	0.000176341
ENSG00000007384	RHBDF1	protein_coding	93.0231	4.12103	1.48897e-07	5.97249e-06
ENSG00000198729	PPP1R14C	protein_coding	17.9703	4.1204	0.000599776	0.00520537
ENSG00000177694	NAALADL2	protein_coding	11.5975	4.12034	0.000951873	0.00754019
ENSG00000175857	GAPT	protein_coding	27.5163	4.11983	1.84127e-07	7.13552e-06
ENSG00000213144	PDAP1 pseudogene	Processed pseudogene	27.4578	4.11389	9.03923e-06	0.000171868
ENSG00000163347	CLDN1	protein_coding	156.014	4.11325	5.98422e-05	0.000802626
ENSG00000137831	UACA	protein_coding	50.7441	4.11227	4.39505e-09	3.5844e-07
ENSG00000130202	NECTIN2	protein_coding	328.34	4.10998	1.07237e-06	2.95644e-05
ENSG00000239269	RPSAP4	protein_coding	9.82383	4.1098	0.000183853	0.00200601
ENSG00000241458	RPL7P19	protein_coding	19.6737	4.10932	4.53759e-05	0.000645012
INGMG_001803	NA	LncRNA	3.22889	4.10489	0.00108432	0.00832386
ENSG00000157657	ZNF618	protein_coding	48.8346	4.10283	2.09394e-09	1.93272e-07
ENSG00000085741	WNT11	protein_coding	9.42919	4.10269	6.96161e-06	0.000140058
ENSG00000175928	LRRN1	protein_coding	18.1905	4.1024	1.48356e-05	0.000258662
ENSG00000228218	ATF4P3	protein_coding	142.155	4.09764	5.34504e-08	2.67457e-06
ENSG00000079931	MOXD1	protein_coding	19.3661	4.0952	3.08522e-05	0.000470901
ENSG00000170962	PDGFD	protein_coding	24.6193	4.09512	6.37445e-06	0.000130733
ENSG00000243181	RPL21P80	protein_coding	53.2908	4.09131	1.00159e-08	6.98069e-07
ENSG00000153721	CNKSR3	protein_coding	52.5865	4.09088	1.1547e-06	3.14532e-05
ENSG00000182240	BACE2	protein_coding	180.558	4.09006	4.06546e-07	1.3334e-05
ENSG00000119865	CNRIP1	protein_coding	21.0339	4.08877	5.32312e-07	1.68912e-05
ENSG00000167680	SEMA6B	protein_coding	344.025	4.0875	6.45868e-07	1.96064e-05
ENSG00000213386	FAM58A pseudogene	Transcribed processed pseudogene	4.43433	4.08543	0.000366258	0.00349757
ENSG00000256148	MT-COI pseudogene	Processed pseudogene	25.5579	4.08266	2.20515e-07	8.29043e-06
ENSG00000223668	EEF1A1P24	protein_coding	30.2262	4.07645	1.92304e-06	4.75899e-05
ENSG00000153253	SCN3A	protein_coding	14.2502	4.0746	0.000744332	0.00620564
ENSG00000198719	DLL1	protein_coding	26.3462	4.07408	2.48118e-10	3.82302e-08
ENSG00000145423	SFRP2	protein_coding	22.1586	4.071	0.000137999	0.00159285
ENSG00000131401	NAPSB	protein_coding	190.505	4.07002	2.68706e-10	4.04589e-08
ENSG00000240694	PNMA2	protein_coding	73.7267	4.06994	4.373e-05	0.000624867
ENSG00000106819	ASPN	protein_coding	7.35055	4.06982	5.73327e-05	0.000775941
ENSG00000101230	ISM1	protein_coding	15.1958	4.06843	4.38874e-13	2.14116e-10
ENSG00000197140	ADAM32	protein_coding	8.38412	4.06796	4.06506e-05	0.000589979
ENSG00000116254	CHD5	protein_coding	49.1143	4.06627	1.21249e-07	5.12232e-06
ENSG00000038945	MSR1	protein_coding	174.653	4.06609	2.27932e-08	1.31935e-06
ENSG00000131015	ULBP2	protein_coding	63.1319	4.06426	2.13769e-06	5.18225e-05
ENSG00000162522	NHSL3	protein_coding	358.66	4.06311	6.13918e-08	3.00051e-06
ENSG00000215179	MAPK6P4	protein_coding	5.86893	4.06251	0.00133414	0.00984339
ENSG00000070778	PTPN21	protein_coding	38.13	4.06222	5.02258e-06	0.000107037
ENSG00000104921	FCER2	protein_coding	15.4939	4.06014	1.98233e-06	4.87481e-05
ENSG00000134769	DTNA	protein_coding	22.1182	4.05716	4.99837e-05	0.000696382
INGMG_000623	NA	LncRNA	11.5525	4.05581	1.45782e-05	0.000254988
ENSG00000204176	SYT15	protein_coding	17.0594	4.05507	0.000706322	0.00597629
ENSG00000136026	CKAP4	protein_coding	477.256	4.04673	2.43868e-13	1.35974e-10
ENSG00000242265	PEG10	protein_coding	145.933	4.04615	1.67769e-07	6.61416e-06
ENSG00000188290	HES4	protein_coding	131.305	4.04436	3.14543e-05	0.000477955
ENSG00000140968	IRF8	protein_coding	596.941	4.04102	2.23167e-09	2.04602e-07
ENSG00000099998	GGT5	protein_coding	56.7077	4.04102	1.85483e-05	0.000311085
ENSG00000129682	FGF13	protein_coding	14.2255	4.03818	0.00100617	0.00784516
ENSG00000169715	MT1E	protein_coding	770.745	4.03795	9.18303e-06	0.000173987
ENSG00000244734	HBB	protein_coding	61.339	4.03225	0.000277226	0.00279693
ENSG00000211660	IGLV2-23	IG V gene	61.5699	4.03197	0.000173437	0.00191298
CABG_004901	NA	LncRNA	3.27826	4.03181	0.000574917	0.00502634
ENSG00000120694	HSPH1	protein_coding	16109.8	4.03178	3.79713e-07	1.26206e-05
ENSG00000196183	RPS2P4	protein_coding	7.40568	4.03164	0.00050084	0.00451231
ENSG00000101871	MID1	protein_coding	31.9099	4.02719	2.05179e-06	5.02304e-05
ENSG00000119630	PGF	protein_coding	73.0462	4.02495	2.50425e-07	9.1234e-06
ENSG00000125810	CD93	protein_coding	442.285	4.02478	9.03213e-07	2.57317e-05
ENSG00000239219	FHL1P1	protein_coding	4.10019	4.02447	0.000694108	0.0058857
ENSG00000184305	CCSER1	protein_coding	14.1804	4.01747	1.53433e-05	0.000265482
ENSG00000274584	RECQL pseudogene	unprocessed pseudogene	7.54679	4.01744	0.00048915	0.00442066
ENSG00000175489	LRRC25	protein_coding	34.7827	4.01683	3.65514e-05	0.00054214
ENSG00000161681	SHANK1	protein_coding	4.16063	4.01635	0.00098028	0.0077049
ENSG00000196503	ARL9	protein_coding	6.22539	4.01465	7.85014e-05	0.00100268
ENSG00000166900	STX3	protein_coding	324.214	4.01264	7.18867e-14	5.34779e-11
ENSG00000198853	RUSC2	protein_coding	104.509	4.01209	1.18806e-08	7.97519e-07
ENSG00000234589	RPL13AP24	protein_coding	268.902	4.01158	3.88207e-08	2.05149e-06
ENSG00000114923	SLC4A3	protein_coding	16.3331	4.01127	3.40322e-06	7.62752e-05
ENSG00000234289	H2BC12L	protein_coding	8.156	4.01059	0.000292358	0.00292368
ENSG00000092295	TGM1	protein_coding	519.799	4.00853	8.05035e-09	5.85648e-07
ENSG00000064225	ST3GAL6	protein_coding	38.18	4.00573	2.45803e-05	0.000392265
ENSG00000155254	MARVELD1	protein_coding	208.031	4.0028	6.43103e-07	1.95527e-05
ENSG00000049540	ELN	protein_coding	16.8783	4.00242	4.11967e-09	3.39017e-07
ENSG00000102678	FGF9	protein_coding	36.765	4.00169	5.45754e-13	2.52721e-10
ENSG00000100292	HMOX1	protein_coding	2271.52	3.99984	2.48555e-07	9.1029e-06
ENSG00000066056	TIE1	protein_coding	19.7738	3.9987	3.03809e-06	6.92852e-05
ENSG00000232472	EEF1B2P3	protein_coding	163.271	3.99779	1.34265e-09	1.31952e-07
ENSG00000153904	DDAH1	protein_coding	57.6788	3.99613	8.62155e-06	0.000165396
ENSG00000102221	JADE3	protein_coding	87.5012	3.99565	3.90192e-09	3.23601e-07
ENSG00000123977	DAW1	protein_coding	13.345	3.99444	0.00122322	0.00916358
ENSG00000166928	MS4A14	protein_coding	33.3812	3.99396	5.05086e-05	0.000701741
ENSG00000151693	ASAP2	protein_coding	127.029	3.9818	8.62666e-06	0.000165396
ENSG00000163563	MNDA	protein_coding	52.1412	3.98097	6.36131e-08	3.10353e-06
ENSG00000166920	C15orf48	protein_coding	160.707	3.9793	8.14319e-06	0.000158574
ENSG00000160145	KALRN	protein_coding	76.267	3.97374	1.23179e-09	1.23727e-07
ENSG00000007237	GAS7	protein_coding	108.775	3.97313	1.83112e-10	2.97786e-08
ENSG00000104972	LILRB1	protein_coding	73.83	3.97118	7.51613e-09	5.56499e-07
ENSG00000164935	DCSTAMP	protein_coding	10.9379	3.96995	9.13784e-05	0.00112944
ENSG00000219928	RPS29 pseudogene	Processed pseudogene	49.3614	3.96958	8.24662e-06	0.000159905
ENSG00000136869	TLR4	protein_coding	76.848	3.96433	3.41186e-07	1.16519e-05
ENSG00000172260	NEGR1	protein_coding	5.95874	3.96414	0.000876042	0.00705195
ENSG00000182963	GJC1	protein_coding	35.397	3.96273	1.35622e-06	3.56625e-05
ENSG00000163220	S100A9	protein_coding	355.472	3.96167	1.44856e-05	0.000253531
ENSG00000213853	EMP2	protein_coding	84.4464	3.96042	2.01704e-05	0.000332776
CATG00000092345	NA	LncRNA	11.3011	3.95965	7.87471e-05	0.00100535
ENSG00000004799	PDK4	protein_coding	113.31	3.95707	3.83297e-07	1.27094e-05
ENSG00000007264	MATK	protein_coding	120.871	3.95118	2.76299e-12	9.55538e-10
ENSG00000184378	ACTRT3	protein_coding	23.9714	3.94967	7.57106e-06	0.000149632
ENSG00000241352	RPS6 pseudogene	Processed pseudogene	30.014	3.94909	3.82284e-08	2.03594e-06
ENSG00000277258	PCGF2	protein_coding	36.9788	3.94822	6.76616e-05	0.000885337
ENSG00000120885	CLU	protein_coding	692.1	3.94813	4.68917e-08	2.39463e-06
ENSG00000176533	GNG7	protein_coding	180.793	3.94338	3.89268e-11	8.50815e-09
ENSG00000242262	RPL15P7	protein_coding	43.1277	3.93964	2.69162e-06	6.29066e-05
ENSG00000214595	EML6	protein_coding	117.853	3.93852	1.29798e-06	3.45299e-05
ENSG00000171812	COL8A2	protein_coding	34.8001	3.93498	5.67492e-06	0.000118535
ENSG00000184349	EFNA5	protein_coding	62.9137	3.92675	0.000116494	0.00138139
ENSG00000112290	WASF1	protein_coding	86.2169	3.92523	5.38628e-11	1.12335e-08
ENSG00000116761	CTH	protein_coding	82.1762	3.92445	5.77467e-10	7.05424e-08
ENSG00000273837	NA	LncRNA	5.39297	3.92374	0.000634516	0.00544802
ENSG00000174607	UGT8	protein_coding	28.1289	3.92338	5.17168e-05	0.000713253
ENSG00000258227	CLEC5A	protein_coding	54.8631	3.92203	4.22316e-05	0.000607269
ENSG00000184612	RPL7P26	protein_coding	48.6747	3.92142	9.50501e-07	2.67167e-05
ENSG00000187479	C11orf96	protein_coding	65.6779	3.91968	3.55446e-06	7.90809e-05
ENSG00000128268	MGAT3	protein_coding	53.1402	3.91807	2.76113e-05	0.000430085
ENSG00000177706	FAM20C	protein_coding	120.032	3.91336	9.46375e-06	0.000177704
ENSG00000158473	CD1D	protein_coding	25.8612	3.91181	3.16909e-06	7.18528e-05
ENSG00000213950	RPS10P2	protein_coding	23.4643	3.91101	7.03455e-08	3.35412e-06
ENSG00000124212	PTGIS	protein_coding	244.609	3.90635	1.80924e-05	0.000304561
ENSG00000234287	RPS27P4	protein_coding	128.783	3.9031	4.33265e-09	3.54408e-07
ENSG00000166428	PLD4	protein_coding	47.9716	3.9011	1.85604e-06	4.61829e-05
ENSG00000140945	CDH13	protein_coding	19.4656	3.89972	9.90988e-05	0.00120279
ENSG00000255874	PRECSIT	protein_coding	8.83805	3.89637	8.49327e-05	0.00106736
ENSG00000278318	ZNF229	protein_coding	33.0448	3.89593	9.21919e-06	0.000174551
ENSG00000245648	KLRK1-AS1	LncRNA	20.4802	3.89207	0.000317278	0.00312184
ENSG00000125266	EFNB2	protein_coding	212.578	3.89199	2.09225e-06	5.08648e-05
ENSG00000177675	CD163L1	protein_coding	18.7422	3.88475	2.84055e-05	0.000440197
ENSG00000138696	BMPR1B	protein_coding	8.37732	3.88227	0.000106285	0.00127641
ENSG00000142910	TINAGL1	protein_coding	77.7257	3.88043	9.74684e-05	0.00118722
ENSG00000212664	RPL17P39	protein_coding	129.848	3.8755	2.33625e-09	2.12762e-07
ENSG00000146592	CREB5	protein_coding	53.2849	3.87196	7.17044e-07	2.14102e-05
ENSG00000171798	KNDC1	protein_coding	40.3744	3.86887	3.62381e-05	0.000537784
ENSG00000197632	SERPINB2	protein_coding	322.411	3.86662	0.000125802	0.00147071
ENSG00000249774	TOMM7 pseudogene	Processed pseudogene	8.29961	3.86048	3.70985e-05	0.000548171
ENSG00000241556	RPL29P26	protein_coding	79.8326	3.86022	1.7814e-07	6.94289e-06
ENSG00000150627	WDR17	protein_coding	8.56469	3.85891	1.16265e-05	0.000210641
ENSG00000160223	ICOSLG	protein_coding	100.463	3.85827	3.56863e-10	5.01635e-08
ENSG00000128564	VGF	protein_coding	11.6124	3.85564	2.12166e-05	0.000345858
ENSG00000103196	CRISPLD2	protein_coding	72.7541	3.85365	2.54937e-06	6.00959e-05
ENSG00000181444	ZNF467	protein_coding	38.5077	3.85334	1.02434e-09	1.09321e-07
ENSG00000006534	ALDH3B1	protein_coding	104.848	3.85174	2.90307e-07	1.02607e-05
ENSG00000084636	COL16A1	protein_coding	40.2048	3.8517	3.86193e-07	1.27584e-05
ENSG00000010671	BTK	protein_coding	215.58	3.84901	5.39686e-07	1.7028e-05
ENSG00000144857	BOC	protein_coding	22.7758	3.84872	1.12896e-06	3.08751e-05
ENSG00000134909	ARHGAP32	protein_coding	108.976	3.8486	4.44673e-09	3.60501e-07
ENSG00000153885	KCTD15	protein_coding	133.869	3.84559	6.1073e-06	0.000126216
ENSG00000147642	SYBU	protein_coding	40.4079	3.84551	4.20115e-09	3.44683e-07
ENSG00000227337	RPL23AP43	protein_coding	10.6161	3.84205	0.00112634	0.00859331
ENSG00000135549	PKIB	protein_coding	22.1619	3.84114	4.07081e-05	0.000589979
ENSG00000117122	MFAP2	protein_coding	24.5594	3.83891	1.035e-05	0.000191019
INGMG_002276	NA	LncRNA	17.5154	3.83719	1.65195e-05	0.000281729
ENSG00000109743	BST1	protein_coding	22.138	3.83519	8.83931e-07	2.52878e-05
ENSG00000063660	GPC1	protein_coding	332.111	3.83517	7.49427e-10	8.67363e-08
ENSG00000109321	AREG	protein_coding	202.146	3.83208	1.49964e-06	3.86891e-05
ENSG00000149798	CDC42EP2	protein_coding	180.287	3.83204	2.31718e-07	8.6368e-06
INGMG_000428	NA	LncRNA	6.52912	3.83175	0.000599475	0.0052044
ENSG00000168779	SHOX2	protein_coding	12.5933	3.83014	0.000448038	0.00411457
ENSG00000174807	CD248	protein_coding	16.0112	3.82994	6.68762e-05	0.000876739
ENSG00000003249	DBNDD1	protein_coding	49.2295	3.82873	7.16881e-09	5.366e-07
ENSG00000143546	S100A8	protein_coding	141.802	3.82766	1.08634e-05	0.000199195
ENSG00000235045	RPL7P8	protein_coding	9.80408	3.82741	1.72049e-05	0.000291779
ENSG00000171729	TMEM51	protein_coding	85.9186	3.82655	3.81925e-05	0.0005613
ENSG00000142798	HSPG2	protein_coding	139.106	3.82257	1.22421e-08	8.15773e-07
ENSG00000231747	RPS20 pseudogene	Processed pseudogene	18.9533	3.82121	1.84171e-06	4.591e-05
ENSG00000053747	LAMA3	protein_coding	47.4984	3.82048	6.50765e-05	0.00086109
ENSG00000066629	EML1	protein_coding	17.4888	3.81693	2.50872e-05	0.000398068
ENSG00000211933	IGHV6-1	IG V gene	7.32586	3.81665	0.000328302	0.00320913
ENSG00000228053	RPL21P87	protein_coding	8.39075	3.81589	0.00124289	0.00927536
ENSG00000134853	PDGFRA	protein_coding	12.0341	3.81534	3.26681e-05	0.000492478
ENSG00000137801	THBS1	protein_coding	2244.05	3.81405	3.54281e-06	7.88861e-05
ENSG00000197405	C5AR1	protein_coding	273.599	3.80641	5.98694e-08	2.93661e-06
ENSG00000230383	RPL6P19	protein_coding	93.9095	3.80637	9.56904e-08	4.27182e-06
ENSG00000272523	LINC01023	LncRNA	4.17728	3.80468	0.000312279	0.00308452
ENSG00000075340	ADD2	protein_coding	58.7711	3.8046	1.48538e-07	5.96794e-06
ENSG00000164070	HSPA4L	protein_coding	72.9036	3.80452	3.35255e-05	0.000503269
ENSG00000219507	FTH1P8	protein_coding	96.7647	3.7988	3.99177e-07	1.31397e-05
ENSG00000111321	LTBR	protein_coding	199.567	3.7973	4.00992e-06	8.7644e-05
ENSG00000164761	TNFRSF11B	protein_coding	23.3761	3.79688	0.000152014	0.00171974
ENSG00000131386	GALNT15	protein_coding	9.59818	3.79583	0.000120523	0.00141809
ENSG00000205871	RPS3AP47	protein_coding	133.215	3.79369	4.23628e-08	2.20877e-06
ENSG00000203685	STUM	protein_coding	19.4782	3.79293	0.000215354	0.00227081
ENSG00000169213	RAB3B	protein_coding	25.1964	3.78791	3.38449e-05	0.00050695
ENSG00000277443	MARCKS	protein_coding	740.412	3.78787	9.68563e-08	4.31682e-06
ENSG00000243904	RPSAP5	protein_coding	14.8905	3.78691	0.000601544	0.00521739
ENSG00000256968	SNRPEP2	protein_coding	8.99863	3.78503	7.61008e-05	0.000976983
ENSG00000006740	ARHGAP44	protein_coding	90.6207	3.78366	1.32823e-08	8.7023e-07
ENSG00000180190	TDRP	protein_coding	57.9686	3.78248	1.92961e-07	7.41476e-06
ENSG00000188906	LRRK2	protein_coding	138.289	3.78181	5.71435e-08	2.83342e-06
ENSG00000232716	ZNF131 pseudogene	Processed pseudogene	2.47456	3.78129	0.000188319	0.00203926
ENSG00000262714	NA	LncRNA	6.56572	3.78116	3.85998e-05	0.000566068
ENSG00000067798	NAV3	protein_coding	23.4876	3.77901	2.33655e-05	0.000376094
ENSG00000142089	IFITM3	protein_coding	1255.82	3.7769	1.75101e-06	4.41729e-05
ENSG00000188536	HBA2	protein_coding	12.0923	3.77672	0.00039677	0.0037213
ENSG00000068137	PLEKHH3	protein_coding	36.8657	3.77224	1.78466e-06	4.47328e-05
ENSG00000175029	CTBP2	protein_coding	177.176	3.7722	2.78064e-09	2.46655e-07
ENSG00000115457	IGFBP2	protein_coding	51.6282	3.77197	6.05779e-06	0.000125478
ENSG00000151929	BAG3	protein_coding	2839.31	3.77187	8.50137e-07	2.45006e-05
ENSG00000126947	ARMCX1	protein_coding	82.5846	3.77185	5.93879e-07	1.83337e-05
ENSG00000157168	NRG1	protein_coding	5.35698	3.76817	0.000466339	0.00425262
ENSG00000093134	VNN3P	protein_coding	15.978	3.76796	8.75992e-09	6.24882e-07
ENSG00000183199	HSP90AB3P	protein_coding	142.345	3.76714	1.02304e-07	4.50089e-06
ENSG00000103316	CRYM	protein_coding	8.23481	3.76701	0.000607945	0.0052529
ENSG00000234648	RPL3 pseudogene	Processed pseudogene	201.63	3.76586	4.87481e-08	2.46183e-06
ENSG00000179776	CDH5	protein_coding	7.58001	3.76431	0.00046965	0.00427567
ENSG00000154553	PDLIM3	protein_coding	18.8912	3.76389	2.36651e-05	0.000380325
ENSG00000244482	LILRA6	protein_coding	10.2757	3.75936	0.000345092	0.0033398
INGMG_lincRNAs_TIL_000584	NA	LncRNA	3.16596	3.75868	0.0010891	0.00835357
ENSG00000172264	MACROD2	protein_coding	18.4867	3.75781	2.51702e-05	0.000398653
ENSG00000106211	HSPB1	protein_coding	4377.08	3.757	6.76907e-07	2.04126e-05
ENSG00000187800	PEAR1	protein_coding	32.1402	3.75486	8.22793e-05	0.00104168
ENSG00000181359	HSP90AA6P	protein_coding	14.5364	3.75177	2.21193e-05	0.000358436
ENSG00000253785	PPA1 pseudigenes	Processed pseudogene	12.5141	3.74986	4.36717e-05	0.000624361
ENSG00000213309	RPL9P18	protein_coding	22.1778	3.74499	7.21897e-05	0.000936952
ENSG00000043039	BARX2	protein_coding	279.693	3.74174	8.71353e-05	0.00108704
ENSG00000166927	MS4A7	protein_coding	152.966	3.74142	3.30272e-06	7.43887e-05
ENSG00000085265	FCN1	protein_coding	65.2106	3.7411	8.61889e-05	0.00107918
ENSG00000158966	CACHD1	protein_coding	16.5355	3.73688	0.000162873	0.00181701
ENSG00000169122	FAM110B	protein_coding	24.917	3.73678	4.54571e-05	0.000645831
ENSG00000165617	DACT1	protein_coding	24.1586	3.73541	8.76852e-08	4.0061e-06
ENSG00000232368	FTLP2	protein_coding	41.664	3.73506	1.21284e-07	5.12232e-06
ENSG00000019549	SNAI2	protein_coding	17.5218	3.73172	0.000123751	0.00145232
ENSG00000224411	HSP90AA2P	protein_coding	218.256	3.73001	1.01103e-06	2.8186e-05
ENSG00000273062	RALGPS2-AS1	LncRNA	5.38489	3.72974	0.000644079	0.00551799
ENSG00000168461	RAB31	protein_coding	477.01	3.72944	2.96736e-07	1.04457e-05
ENSG00000145431	PDGFC	protein_coding	38.7568	3.72905	4.00923e-05	0.000584359
ENSG00000225416	RPL36AP28	protein_coding	17.9698	3.72863	3.40754e-07	1.16518e-05
ENSG00000226499	RPS2 pseudogene	Processed pseudogene	32.0467	3.72406	1.74926e-07	6.83714e-06
ENSG00000050767	COL23A1	protein_coding	15.6886	3.72235	2.9945e-05	0.000460398
ENSG00000234004	RPS25 pseudogene	Processed pseudogene	74.9779	3.72125	5.18322e-07	1.6524e-05
ENSG00000187079	TEAD1	protein_coding	361.329	3.7199	1.50815e-05	0.000262516
ENSG00000182704	TSKU	protein_coding	54.2984	3.71768	0.000152259	0.0017218
ENSG00000019144	PHLDB1	protein_coding	244.267	3.717	7.43809e-14	5.34779e-11
ENSG00000197558	SSPOP	protein_coding	12.5744	3.71626	7.08023e-08	3.37002e-06
ENSG00000170961	HAS2	protein_coding	32.0041	3.71486	0.00027602	0.00278682
ENSG00000242477	RPL10A pseudogene	Processed pseudogene	18.9715	3.71236	7.41615e-06	0.000147572
ENSG00000234176	HSPA8P1	protein_coding	104.418	3.71137	4.66302e-07	1.4988e-05
ENSG00000149927	DOC2A	protein_coding	20.0685	3.71132	0.000105161	0.00126792
ENSG00000242960	FTH1P23	protein_coding	66.6245	3.71121	4.23262e-07	1.37176e-05
ENSG00000011105	TSPAN9	protein_coding	117.527	3.70489	1.25284e-09	1.2538e-07
ENSG00000117009	KMO	protein_coding	65.7146	3.70483	3.85623e-06	8.48278e-05
ENSG00000152804	HHEX	protein_coding	123.975	3.70342	1.3372e-06	3.52982e-05
ENSG00000169291	SHE	protein_coding	24.1289	3.70335	3.80685e-05	0.00055978
ENSG00000178464	RPL10P16	protein_coding	313.865	3.70329	6.45113e-08	3.12502e-06
ENSG00000148082	SHC3	protein_coding	7.03415	3.69597	1.0243e-06	2.8498e-05
ENSG00000133401	PDZD2	protein_coding	334.757	3.69403	6.66701e-07	2.01493e-05
ENSG00000169504	CLIC4	protein_coding	2859.67	3.69277	3.97118e-07	1.30877e-05
ENSG00000182022	CHST15	protein_coding	317.339	3.69201	2.42066e-07	8.91307e-06
ENSG00000038427	VCAN	protein_coding	343.815	3.68998	5.1957e-05	0.000715843
ENSG00000198574	SH2D1B	protein_coding	62.6147	3.68976	2.13405e-05	0.000347464
ENSG00000218426	RPL27A pseudogene	Processed pseudogene	478.187	3.68942	1.49294e-08	9.57477e-07
ENSG00000277715	NA	LncRNA	3.18033	3.6891	4.71928e-05	0.000664959
ENSG00000277075	H2AC8	protein_coding	22.6456	3.68572	0.000243557	0.00251102
ENSG00000174939	ASPHD1	protein_coding	52.2035	3.68515	4.68581e-05	0.000662292
ENSG00000213885	RPL13AP7	protein_coding	28.3297	3.68458	1.35068e-08	8.76514e-07
ENSG00000230629	RPS23P8	protein_coding	183.089	3.6816	2.3854e-07	8.80698e-06
ENSG00000212695	RPL18 pseudogene	Processed pseudogene	3.40624	3.68086	0.00103606	0.00804379
ENSG00000226525	RPS7P10	protein_coding	100.893	3.67921	1.23374e-07	5.16978e-06
ENSG00000051128	HOMER3	protein_coding	54.86	3.67649	1.34984e-07	5.52083e-06
ENSG00000153162	BMP6	protein_coding	31.1815	3.67301	0.000148863	0.00169603
ENSG00000182809	CRIP2	protein_coding	262.957	3.67021	1.81507e-07	7.054e-06
ENSG00000130529	TRPM4	protein_coding	54.5908	3.66938	7.643e-05	0.000979889
ENSG00000163501	IHH	protein_coding	4.3588	3.66854	0.00108023	0.0083065
ENSG00000231767	RPS27AP5	protein_coding	121.455	3.66666	2.20605e-07	8.29043e-06
ENSG00000144824	PHLDB2	protein_coding	488.519	3.66621	8.03713e-07	2.34346e-05
ENSG00000227295	ELL2P1	protein_coding	7.50602	3.6651	0.000187795	0.00203749
ENSG00000255398	HCAR3	protein_coding	15.9785	3.66445	0.00101431	0.00789963
ENSG00000123342	MMP19	protein_coding	229.979	3.66041	9.70065e-06	0.00018121
ENSG00000198121	LPAR1	protein_coding	34.7651	3.65948	0.000220979	0.00232028
ENSG00000021461	CYP3A43	protein_coding	2.59009	3.65469	0.00107183	0.00826285
ENSG00000126803	HSPA2	protein_coding	147.849	3.65316	3.41839e-07	1.16596e-05
ENSG00000105974	CAV1	protein_coding	222.144	3.65126	1.35177e-08	8.76514e-07
ENSG00000197629	MPEG1	protein_coding	213.747	3.65026	9.00996e-08	4.07483e-06
ENSG00000080644	CHRNA3	protein_coding	15.3038	3.64817	0.00094485	0.00750106
ENSG00000132688	NES	protein_coding	54.766	3.6477	0.000183412	0.002002
ENSG00000249617	RPS20 pseudogene	Processed pseudogene	4.7916	3.64736	0.000546554	0.00484113
ENSG00000147027	TMEM47	protein_coding	9.9049	3.64682	9.30667e-06	0.00017541
ENSG00000110799	VWF	protein_coding	36.9042	3.64622	0.000442531	0.00407633
ENSG00000213261	EEF1B2P6	protein_coding	34.349	3.64555	8.78363e-07	2.52098e-05
ENSG00000187474	FPR3	protein_coding	190.666	3.64452	1.09822e-05	0.000201102
ENSG00000011465	DCN	protein_coding	90.1035	3.64369	6.50144e-05	0.000861008
ENSG00000237039	RPS28P4	protein_coding	23.1785	3.64325	8.73095e-08	3.99561e-06
ENSG00000171617	ENC1	protein_coding	186.357	3.64303	2.24811e-08	1.30738e-06
ENSG00000166341	DCHS1	protein_coding	191.198	3.64239	7.12007e-11	1.40962e-08
ENSG00000221866	PLXNA4	protein_coding	98.6915	3.63821	0.000221454	0.00232258
ENSG00000166387	PPFIBP2	protein_coding	161.863	3.63789	3.20207e-12	1.08004e-09
ENSG00000169902	TPST1	protein_coding	24.0549	3.63758	8.20716e-08	3.80692e-06
ENSG00000213694	S1PR3	protein_coding	20.8048	3.63693	0.000860764	0.00695561
ENSG00000186522	SEPTIN10	protein_coding	159.599	3.63532	1.448e-08	9.3304e-07
ENSG00000144648	ACKR2	protein_coding	6.60431	3.63475	0.000352127	0.00339585
ENSG00000229344	MTCO2P12	protein_coding	800.663	3.63469	2.00222e-09	1.87338e-07
ENSG00000168502	MTCL1	protein_coding	50.1099	3.63347	1.2833e-06	3.42776e-05
ENSG00000188643	S100A16	protein_coding	148.715	3.63076	7.22236e-05	0.000936952
ENSG00000241494	RPL26L1 pseudogene	Processed pseudogene	34.2253	3.63049	9.10248e-07	2.58512e-05
ENSG00000137463	MGARP	protein_coding	7.0331	3.62762	0.000719756	0.00605246
ENSG00000242571	RPL21P11	protein_coding	50.3371	3.62588	7.82078e-07	2.30254e-05
ENSG00000011422	PLAUR	protein_coding	781.442	3.62552	4.0727e-05	0.000589979
ENSG00000138315	OIT3	protein_coding	3.70393	3.62014	0.00105141	0.00813756
ENSG00000180739	S1PR5	protein_coding	19.9126	3.61748	8.74369e-05	0.00108981
ENSG00000123096	SSPN	protein_coding	16.5069	3.61704	4.12188e-06	8.98037e-05
ENSG00000180340	FZD2	protein_coding	6.56443	3.61495	0.000539715	0.00479219
ENSG00000226360	RPL10AP6	protein_coding	159.995	3.61339	4.18784e-08	2.18769e-06
ENSG00000234093	RPS15AP11	protein_coding	11.2197	3.6127	9.66102e-06	0.000180787
ENSG00000138162	TACC2	protein_coding	33.351	3.6127	9.33073e-05	0.00114725
ENSG00000214784	RPS3AP21	protein_coding	56.685	3.61213	2.58554e-06	6.0687e-05
ENSG00000158315	RHBDL2	protein_coding	19.6912	3.60895	9.46224e-05	0.00116072
ENSG00000221340	RNU6ATAC18P	protein_coding	5.8152	3.60889	3.03654e-05	0.000464769
ENSG00000047648	ARHGAP6	protein_coding	17.5114	3.60753	1.10001e-06	3.02043e-05
ENSG00000108852	MPP2	protein_coding	18.6697	3.60417	3.10161e-07	1.07537e-05
ENSG00000106565	TMEM176B	protein_coding	344.628	3.60367	0.00017155	0.00189524
ENSG00000132640	BTBD3	protein_coding	45.668	3.60277	3.51933e-06	7.86172e-05
ENSG00000164125	GASK1B	protein_coding	71.8322	3.60164	5.43162e-05	0.000743101
ENSG00000154096	THY1	protein_coding	30.7011	3.6013	1.57649e-05	0.000271572
ENSG00000181982	CCDC149	protein_coding	19.3209	3.59981	0.000482576	0.00438021
ENSG00000135116	HRK	protein_coding	9.23926	3.59813	9.46555e-05	0.00116072
ENSG00000197763	TXNRD3	protein_coding	12.7737	3.59798	1.33477e-07	5.47555e-06
ENSG00000139174	PRICKLE1	protein_coding	35.5196	3.59651	2.79927e-06	6.50331e-05
ENSG00000125148	MT2A	protein_coding	4493.44	3.59643	9.24213e-06	0.000174864
ENSG00000263934	SNORD3A	protein_coding	180.379	3.59565	3.66848e-09	3.09341e-07
ENSG00000267666	NA	LncRNA	5.2977	3.59474	0.00104746	0.0081116
ENSG00000159189	C1QC	protein_coding	296.712	3.59251	4.56332e-05	0.000647659
ENSG00000169752	NRG4	protein_coding	59.3884	3.59212	2.50851e-05	0.000398068
ENSG00000231991	ANXA2P2	protein_coding	87.7132	3.58905	6.94905e-07	2.08632e-05
ENSG00000011600	TYROBP	protein_coding	251.227	3.58832	2.50112e-06	5.92142e-05
ENSG00000267541	MTCO2P2	protein_coding	36.7874	3.58824	1.0885e-05	0.000199456
ENSG00000168916	ZNF608	protein_coding	28.742	3.58664	0.000801841	0.00657476
ENSG00000107719	PALD1	protein_coding	35.3739	3.58444	8.80279e-07	2.52098e-05
ENSG00000235001	EIF4A1P2	protein_coding	43.3919	3.58121	2.92613e-06	6.7237e-05
ENSG00000100302	RASD2	protein_coding	34.4528	3.57724	9.17902e-07	2.59876e-05
ENSG00000226243	RPL37AP1	protein_coding	21.3308	3.57615	0.000134952	0.00156296
ENSG00000214541	RPS4XP3	protein_coding	57.1141	3.57596	5.7024e-07	1.77646e-05
ENSG00000157470	FAM81A	protein_coding	8.09149	3.57539	0.00134273	0.00989608
ENSG00000124216	SNAI1	protein_coding	95.7261	3.57351	5.92641e-06	0.00012313
ENSG00000137285	TUBB2B	protein_coding	25.1708	3.5734	5.24228e-05	0.00072117
ENSG00000147459	DOCK5	protein_coding	425.811	3.57199	2.16774e-05	0.000351901
ENSG00000131711	MAP1B	protein_coding	214.844	3.56758	1.53053e-06	3.92635e-05
ENSG00000144218	AFF3	protein_coding	174.079	3.56753	1.14017e-09	1.17511e-07
ENSG00000130300	PLVAP	protein_coding	53.3772	3.56652	5.77314e-05	0.000779673
ENSG00000258168	PTPRB-AS1	LncRNA	7.9214	3.56347	0.000931855	0.00742323
ENSG00000278943	NA	TEC	12.3931	3.55893	8.80735e-05	0.00109674
ENSG00000279980	GABARAPL3	protein_coding	6.58564	3.55749	0.000410103	0.00382273
ENSG00000198768	APCDD1L	protein_coding	3.12537	3.55695	0.000297979	0.00296687
ENSG00000219986	BTF3P7	protein_coding	19.8237	3.55436	0.000395989	0.00371653
ENSG00000204219	TCEA3	protein_coding	79.3258	3.55291	4.81469e-13	2.26797e-10
ENSG00000134780	DAGLA	protein_coding	21.9642	3.55149	3.78002e-06	8.33073e-05
ENSG00000004478	FKBP4	protein_coding	4513.29	3.55112	1.43776e-07	5.81081e-06
ENSG00000263961	RHEX	protein_coding	50.854	3.55065	2.61413e-05	0.000411646
ENSG00000214389	RPS3AP26	protein_coding	564.609	3.55033	1.88143e-09	1.76642e-07
ENSG00000082397	EPB41L3	protein_coding	342.504	3.55032	4.75877e-05	0.000669777
ENSG00000151650	VENTX	protein_coding	12.0872	3.55	0.000229904	0.00239558
ENSG00000164542	MATCAP2	protein_coding	51.7139	3.5469	2.20788e-06	5.3242e-05
ENSG00000120057	SFRP5	protein_coding	5.83189	3.54678	0.000443539	0.00408423
ENSG00000114315	HES1	protein_coding	131.211	3.54655	1.4255e-05	0.000249975
ENSG00000013297	CLDN11	protein_coding	31.5962	3.53871	3.95666e-06	8.66879e-05
ENSG00000128815	WDFY4	protein_coding	38.1241	3.5386	3.11513e-07	1.07869e-05
ENSG00000255397	NASPP1	protein_coding	28.8378	3.529	0.00016126	0.00180269
ENSG00000000938	FGR	protein_coding	199.563	3.52885	3.41248e-10	4.8307e-08
ENSG00000162746	FCRLB	protein_coding	9.80149	3.52838	1.35323e-05	0.00023992
ENSG00000137962	ARHGAP29	protein_coding	61.4502	3.52601	0.000444116	0.00408679
INGMG_002682	NA	LncRNA	5.28438	3.52413	5.46112e-06	0.000114772
ENSG00000097096	SYDE2	protein_coding	36.5836	3.52383	8.2397e-09	5.97127e-07
ENSG00000175886	RPL7AP66	protein_coding	37.4146	3.52295	2.06964e-06	5.05513e-05
ENSG00000134539	KLRD1	protein_coding	182.372	3.52195	5.79302e-07	1.79649e-05
ENSG00000092621	PHGDH	protein_coding	129.484	3.52129	9.12803e-07	2.58969e-05
ENSG00000169429	CXCL8	protein_coding	7721.88	3.52071	6.43326e-05	0.000853634
ENSG00000078098	FAP	protein_coding	26.5712	3.51985	1.37189e-05	0.000241971
ENSG00000177575	CD163	protein_coding	347.576	3.5136	0.000186231	0.00202467
ENSG00000119986	AVPI1	protein_coding	201.954	3.51303	4.65121e-07	1.49759e-05
ENSG00000101000	PROCR	protein_coding	145.127	3.51241	8.90523e-06	0.000169902
ENSG00000275832	ARHGAP23	protein_coding	110.605	3.50936	8.356e-06	0.000161453
ENSG00000131042	LILRB2	protein_coding	25.2287	3.50933	0.000130205	0.00151569
ENSG00000135636	DYSF	protein_coding	79.4177	3.50497	0.00021335	0.00225316
ENSG00000230311	TOMM20P4	protein_coding	18.4642	3.50324	1.92995e-05	0.000320342
ENSG00000134061	CD180	protein_coding	70.5924	3.50289	2.61296e-07	9.43046e-06
ENSG00000243648	RPS10 pseudogene	Processed pseudogene	26.2318	3.50266	7.55906e-05	0.000972779
ENSG00000164403	SHROOM1	protein_coding	16.9627	3.50231	0.0003976	0.00372653
ENSG00000165905	LARGE2	protein_coding	49.059	3.50153	1.35691e-07	5.54141e-06
ENSG00000243964	RPL23AP65	protein_coding	146.494	3.49825	2.12921e-06	5.16626e-05
ENSG00000223803	RPS20P14	protein_coding	77.8376	3.49797	8.11699e-07	2.35919e-05
ENSG00000157077	ZFYVE9	protein_coding	87.139	3.49685	2.53909e-14	2.35861e-11
ENSG00000167306	MYO5B	protein_coding	263.045	3.49551	2.14222e-05	0.000348379
ENSG00000118160	SLC8A2	protein_coding	6.45256	3.49449	0.000258621	0.00263452
ENSG00000130513	GDF15	protein_coding	41.6749	3.49426	3.11411e-05	0.000474251
ENSG00000085563	ABCB1	protein_coding	263.463	3.49107	7.96526e-07	2.33497e-05
ENSG00000150594	ADRA2A	protein_coding	5.7581	3.49049	0.000173523	0.00191317
ENSG00000002933	TMEM176A	protein_coding	143.832	3.48963	0.000432192	0.00399456
ENSG00000214222	TUBBP2	protein_coding	11.5969	3.48704	0.000238978	0.00247222
ENSG00000110079	MS4A4A	protein_coding	59.7049	3.48598	5.49705e-05	0.0007498
ENSG00000106624	AEBP1	protein_coding	246.938	3.48493	8.65856e-20	4.73121e-16
ENSG00000131016	AKAP12	protein_coding	86.527	3.48445	9.75474e-06	0.000182042
ENSG00000259388	RLIM pseudogene	Processed pseudogene	8.65251	3.48004	0.000495917	0.0044716
ENSG00000100968	NFATC4	protein_coding	29.7868	3.47989	0.000201592	0.00215649
ENSG00000220749	RPL21P28	protein_coding	138.988	3.4787	1.43197e-09	1.39725e-07
ENSG00000161714	PLCD3	protein_coding	262.813	3.47831	5.62752e-12	1.74715e-09
ENSG00000178429	RPS3AP5	protein_coding	124.957	3.47559	3.52294e-08	1.90595e-06
ENSG00000244363	RPL7P23	protein_coding	68.1362	3.47516	5.72493e-09	4.39356e-07
ENSG00000167772	ANGPTL4	protein_coding	111.602	3.4724	4.43615e-05	0.000632238
ENSG00000154764	WNT7A	protein_coding	6.59499	3.46867	4.01395e-05	0.000584359
ENSG00000151458	ANKRD50	protein_coding	64.9152	3.46521	9.0965e-07	2.58512e-05
INGMG_lincRNAs_TIL_000236	NA	LncRNA	19.0465	3.46487	3.04762e-05	0.000465683
ENSG00000189337	KAZN	protein_coding	34.2955	3.46371	4.33101e-06	9.36877e-05
ENSG00000229503	RPL21P37	protein_coding	5.00805	3.46243	0.00038819	0.003666
ENSG00000173535	TNFRSF10C	protein_coding	4.23127	3.46218	0.00120554	0.00906369
ENSG00000265936	RPL10A pseudogene	Processed pseudogene	31.2107	3.4614	5.86759e-05	0.000790085
ENSG00000184702	SEPTIN5	protein_coding	23.7932	3.45944	0.000196438	0.00211129
ENSG00000162897	FCAMR	protein_coding	4.28232	3.45569	0.00110806	0.00847753
ENSG00000038382	TRIO	protein_coding	1284.09	3.45506	3.49936e-11	7.77285e-09
ENSG00000214016	RPSAP61	protein_coding	14.3868	3.45447	0.000174181	0.00191809
ENSG00000188626	GOLGA8M	protein_coding	13.3947	3.4537	3.58563e-05	0.000532698
ENSG00000162733	DDR2	protein_coding	142.708	3.45179	2.55578e-08	1.44868e-06
ENSG00000240003	RPL7P24	protein_coding	3.52752	3.45087	0.000304475	0.00302273
ENSG00000276231	PIK3R6	protein_coding	51.2887	3.44951	1.66357e-06	4.21991e-05
ENSG00000175793	SFN	protein_coding	368.53	3.44938	9.73957e-05	0.00118686
ENSG00000150457	LATS2	protein_coding	197.695	3.44913	9.45441e-07	2.66293e-05
ENSG00000179604	CDC42EP4	protein_coding	167.739	3.44523	4.56382e-07	1.47212e-05
ENSG00000218175	RPLP1 pseudogene	Processed pseudogene	212.387	3.44372	1.70118e-07	6.68747e-06
ENSG00000215895	HSPA5P1	protein_coding	34.8331	3.44353	8.24564e-06	0.000159905
ENSG00000122863	CHST3	protein_coding	128.916	3.44247	3.58915e-05	0.00053293
ENSG00000124920	MYRF	protein_coding	570.333	3.44235	7.60374e-08	3.58175e-06
ENSG00000237506	RPSAP15	protein_coding	141.975	3.44014	4.14896e-07	1.35267e-05
ENSG00000001617	SEMA3F	protein_coding	29.6593	3.43876	4.53683e-05	0.000645012
ENSG00000198300	PEG3	protein_coding	11.5605	3.43807	5.63628e-05	0.000765352
CATG00000057687	NA	LncRNA	3.45722	3.43707	0.000483847	0.00438302
ENSG00000166352	IFTAP	protein_coding	12.6365	3.43639	4.17115e-06	9.06603e-05
ENSG00000135750	KCNK1	protein_coding	109.596	3.43599	1.03917e-05	0.000191445
ENSG00000182379	NXPH4	protein_coding	23.2021	3.43453	3.30469e-07	1.13284e-05
ENSG00000229161	TCP1P1	protein_coding	8.06689	3.43332	0.000524003	0.00468772
ENSG00000255197	SLC39A13-AS1	LncRNA	14.5363	3.43273	4.43102e-06	9.5624e-05
ENSG00000182272	B4GALNT4	protein_coding	88.2896	3.42542	2.10109e-08	1.24791e-06
ENSG00000074964	ARHGEF10L	protein_coding	89.293	3.42515	4.0437e-05	0.000587649
INGMG_lincRNAs_TIL_001249	NA	LncRNA	28.0569	3.42338	9.70456e-05	0.00118418
ENSG00000213772	EIF1P7	protein_coding	39.0828	3.4224	4.59175e-05	0.000651019
ENSG00000090659	CD209	protein_coding	33.1991	3.41931	4.20147e-05	0.000605105
ENSG00000171105	INSR	protein_coding	130.25	3.4179	1.95768e-08	1.18857e-06
ENSG00000099250	NRP1	protein_coding	295.752	3.41309	2.06569e-05	0.000338959
ENSG00000187720	THSD4	protein_coding	26.2385	3.41248	0.000274004	0.00276852
ENSG00000196878	LAMB3	protein_coding	634.566	3.40909	0.000224094	0.00234308
CATG00000093957	NA	LncRNA	2.2808	3.40804	0.00100845	0.0078607
ENSG00000116661	FBXO2	protein_coding	454.48	3.40295	2.56322e-08	1.44989e-06
ENSG00000130147	SH3BP4	protein_coding	74.1957	3.40277	6.63725e-06	0.000134622
ENSG00000120306	CYSTM1	protein_coding	469.087	3.4005	1.13555e-08	7.67931e-07
ENSG00000227051	C14orf132	protein_coding	24.9522	3.40009	3.42037e-05	0.000511203
ENSG00000217094	PPIAP31	protein_coding	55.6339	3.39703	4.23277e-06	9.17806e-05
ENSG00000074590	NUAK1	protein_coding	43.413	3.39617	0.000156548	0.00176155
ENSG00000197208	SLC22A4	protein_coding	25.6798	3.39596	1.78791e-05	0.000301155
ENSG00000143850	PLEKHA6	protein_coding	62.5965	3.39074	6.62972e-07	2.00588e-05
ENSG00000148498	PARD3	protein_coding	86.5836	3.38996	0.000103956	0.00125505
ENSG00000166448	TMEM130	protein_coding	3.05183	3.38929	0.00133526	0.00984633
ENSG00000135094	SDS	protein_coding	97.4154	3.38908	9.30825e-05	0.00114554
ENSG00000169398	PTK2	protein_coding	347.362	3.38679	1.91595e-08	1.16843e-06
ENSG00000234782	TPT1P9	protein_coding	126.269	3.38631	2.50172e-08	1.4299e-06
ENSG00000234975	FTH1P2	protein_coding	87.9305	3.3846	3.36059e-06	7.54436e-05
ENSG00000263400	TMEM220-AS1	LncRNA	3.32856	3.38352	0.000599417	0.0052044
ENSG00000149257	SERPINH1	protein_coding	1677.89	3.38186	9.78625e-08	4.32638e-06
ENSG00000138670	RASGEF1B	protein_coding	542.967	3.38112	5.59956e-08	2.78156e-06
ENSG00000175352	NRIP3	protein_coding	94.2785	3.37901	2.8971e-06	6.68156e-05
ENSG00000274536	MIR223HG	LncRNA	6.49987	3.37759	0.000119175	0.00140708
ENSG00000145685	LHFPL2	protein_coding	677.103	3.37562	1.15593e-06	3.14554e-05
ENSG00000015568	RGPD5	protein_coding	53.4477	3.37465	4.71603e-06	0.000101136
ENSG00000132002	DNAJB1	protein_coding	20322.3	3.37374	1.98404e-05	0.000328124
ENSG00000108846	ABCC3	protein_coding	213.941	3.37295	0.000117597	0.00139266
ENSG00000224094	RPS24P8	protein_coding	106.417	3.3725	1.1757e-06	3.18979e-05
ENSG00000231414	RPL39P15	protein_coding	119.211	3.37172	9.73981e-08	4.32638e-06
ENSG00000240509	RPL34P18	protein_coding	42.4875	3.36862	1.03298e-06	2.87102e-05
ENSG00000242498	ARPIN	protein_coding	26.2759	3.3678	1.88737e-06	4.6877e-05
ENSG00000234742	RPL17P18	protein_coding	224.931	3.36327	1.63086e-06	4.14096e-05
ENSG00000165757	JCAD	protein_coding	31.2209	3.36318	7.23958e-05	0.00093874
ENSG00000143297	FCRL5	protein_coding	57.178	3.36304	4.90905e-05	0.000685686
ENSG00000124731	TREM1	protein_coding	103.358	3.35951	0.000968948	0.0076312
ENSG00000034053	APBA2	protein_coding	174.775	3.35923	1.67717e-13	1.04141e-10
ENSG00000176788	BASP1	protein_coding	690.333	3.3585	1.28576e-07	5.33055e-06
ENSG00000273716	RPL41 pseudogene	Processed pseudogene	102.563	3.35695	5.25934e-06	0.000111216
ENSG00000213104	NPM1P46	protein_coding	37.1443	3.35424	1.93082e-06	4.76962e-05
ENSG00000064989	CALCRL	protein_coding	50.701	3.35401	0.000648322	0.00554045
ENSG00000135638	EMX1	protein_coding	15.024	3.35396	0.000132518	0.00153868
ENSG00000266074	BAHCC1	protein_coding	57.0398	3.3527	0.000191642	0.00206705
ENSG00000276141	WHAMMP3	protein_coding	82.9253	3.3507	2.31874e-13	1.34788e-10
ENSG00000138587	MNS1	protein_coding	12.7304	3.34687	6.48509e-05	0.000859299
ENSG00000163251	FZD5	protein_coding	54.6609	3.34602	1.49088e-07	5.97249e-06
ENSG00000258469	CHMP4BP1	protein_coding	50.2126	3.34458	7.32207e-05	0.000948087
ENSG00000234268	RPS27P19	protein_coding	60.739	3.3445	3.96301e-05	0.000578743
ENSG00000166147	FBN1	protein_coding	154.743	3.34431	3.79445e-07	1.26206e-05
ENSG00000261652	PIERCE2	protein_coding	5.66708	3.3441	4.15933e-05	0.000599667
ENSG00000158813	EDA	protein_coding	30.0631	3.34059	2.26749e-08	1.31529e-06
ENSG00000198053	SIRPA	protein_coding	491.65	3.33882	5.21526e-06	0.000110626
ENSG00000154237	LRRK1	protein_coding	143.134	3.33747	8.63534e-09	6.19229e-07
ENSG00000214391	TUBAP2	protein_coding	21.5939	3.33733	3.21291e-05	0.000486316
ENSG00000171056	SOX7	protein_coding	13.3254	3.33687	2.93199e-06	6.73149e-05
ENSG00000230979	RPL18A pseudogene	Processed pseudogene	104.108	3.33488	2.86972e-06	6.63638e-05
ENSG00000136149	RPL13AP25	protein_coding	517.751	3.33466	7.99611e-08	3.72801e-06
ENSG00000158747	NBL1	protein_coding	78.1979	3.33338	0.000364354	0.00348304
ENSG00000262902	MTCO1P40	protein_coding	64.7246	3.33217	1.69452e-06	4.28666e-05
ENSG00000211695	TRGV9	protein_coding	11.035	3.33155	0.000659253	0.00562331
ENSG00000105374	NKG7	protein_coding	340.994	3.3313	6.03568e-06	0.000125114
ENSG00000198722	UNC13B	protein_coding	59.1241	3.33126	2.88355e-10	4.24744e-08
INGMG_lincRNAs_TIL_001820	NA	LncRNA	24.5975	3.33042	6.16625e-05	0.000824611
ENSG00000233254	RPL21P134	protein_coding	28.0599	3.32992	4.58033e-05	0.000649736
ENSG00000250746	HSPA5 pseudogene	Processed pseudogene	26.0582	3.32528	8.00281e-05	0.00101932
ENSG00000103888	CEMIP	protein_coding	482.716	3.32488	2.60676e-07	9.42053e-06
ENSG00000107554	DNMBP	protein_coding	215.377	3.3246	2.30493e-10	3.61913e-08
ENSG00000137936	BCAR3	protein_coding	187.395	3.32323	2.82934e-06	6.56199e-05
ENSG00000156049	GNA14	protein_coding	5.80469	3.32139	0.00113742	0.00866059
ENSG00000153563	CD8A	protein_coding	376.791	3.32075	1.39887e-06	3.64673e-05
ENSG00000260805	NA	LncRNA	9.73195	3.31935	1.76962e-06	4.45194e-05
ENSG00000122642	FKBP9	protein_coding	302.114	3.31891	7.70105e-07	2.282e-05
ENSG00000129474	AJUBA	protein_coding	141.228	3.31831	2.73475e-07	9.75406e-06
ENSG00000230592	RPSAP8	protein_coding	23.1865	3.31755	0.000211143	0.00223678
ENSG00000085552	IGSF9	protein_coding	40.8102	3.315	0.000252671	0.00258161
ENSG00000229119	RPLP0P9	protein_coding	58.7123	3.31431	2.97696e-07	1.04472e-05
ENSG00000169031	COL4A3	protein_coding	48.527	3.31256	7.0904e-06	0.000142334
ENSG00000108551	RASD1	protein_coding	63.2866	3.31032	1.30626e-05	0.000233563
ENSG00000213036	AP3 pseudogene	Processed pseudogene	6.7418	3.30823	0.000281729	0.00283817
ENSG00000145911	N4BP3	protein_coding	225.433	3.30144	7.34987e-07	2.1922e-05
ENSG00000127507	ADGRE2	protein_coding	135.151	3.2982	1.95076e-06	4.81017e-05
ENSG00000132465	JCHAIN	protein_coding	192.511	3.2981	5.57672e-05	0.00075953
ENSG00000104611	SH2D4A	protein_coding	55.0966	3.29733	0.000110698	0.00131926
ENSG00000241061	RPL5P1	protein_coding	86.167	3.29692	1.96906e-07	7.52403e-06
ENSG00000241429	EEF1A1P25	protein_coding	108.195	3.2956	4.09439e-07	1.33968e-05
ENSG00000198868	MTND4LP30	protein_coding	29.7125	3.29517	1.50951e-05	0.000262516
ENSG00000225972	MTND1P23	protein_coding	138.741	3.29507	2.36882e-06	5.66216e-05
ENSG00000224376	NA	LncRNA	14.9152	3.2936	0.000172025	0.00189895
ENSG00000166743	ACSM1	protein_coding	8.26993	3.28923	1.20859e-05	0.00021755
ENSG00000163624	CDS1	protein_coding	21.1638	3.28922	1.41449e-05	0.000248286
ENSG00000186642	PDE2A	protein_coding	88.6142	3.28807	4.11137e-07	1.34201e-05
ENSG00000116285	ERRFI1	protein_coding	826.041	3.28798	3.91834e-06	8.60554e-05
ENSG00000170458	CD14	protein_coding	409.978	3.28274	1.41496e-05	0.000248286
ENSG00000132122	SPATA6	protein_coding	20.1691	3.28273	1.30379e-10	2.26884e-08
ENSG00000091181	IL5RA	protein_coding	6.28637	3.2807	0.000176127	0.00193406
ENSG00000214063	TSPAN4	protein_coding	282.144	3.27784	7.34498e-08	3.48389e-06
ENSG00000100065	CARD10	protein_coding	37.1843	3.27705	6.23532e-06	0.000128473
ENSG00000105426	PTPRS	protein_coding	28.2236	3.27397	3.51244e-07	1.18914e-05
ENSG00000279865	NA	TEC	171.898	3.27173	3.77431e-07	1.25907e-05
ENSG00000087253	LPCAT2	protein_coding	62.1035	3.26734	8.86747e-06	0.0001693
ENSG00000196628	TCF4	protein_coding	691.561	3.26677	8.18987e-06	0.000159143
ENSG00000214199	EEF1A1P12	protein_coding	194.946	3.26643	6.38666e-08	3.10832e-06
ENSG00000267199	SPIRE1-AS	LncRNA	4.00461	3.2649	0.000239774	0.00247577
ENSG00000259924	DNAJ14 pseudogene	Processed pseudogene	15.6991	3.26489	1.20569e-05	0.000217286
ENSG00000112796	ENPP5	protein_coding	8.77995	3.26379	0.000144978	0.00166147
ENSG00000137462	TLR2	protein_coding	256.051	3.26119	4.83884e-05	0.000677959
ENSG00000153246	PLA2R1	protein_coding	18.8346	3.26062	0.00064569	0.00552976
ENSG00000236058	RPL17P36	protein_coding	33.3685	3.25966	1.11461e-05	0.000203446
ENSG00000248334	WHAMMP2	protein_coding	62.7429	3.25916	1.15169e-07	4.9545e-06
ENSG00000102934	PLLP	protein_coding	209.71	3.25773	4.10415e-07	1.34126e-05
ENSG00000182782	HCAR2	protein_coding	28.0016	3.25673	0.000764813	0.00634734
ENSG00000125657	TNFSF9	protein_coding	148.699	3.25524	1.83441e-05	0.000308228
ENSG00000137331	IER3	protein_coding	99.9648	3.25266	1.06667e-06	2.94964e-05
ENSG00000174136	RGMB	protein_coding	47.0347	3.2518	5.8718e-26	1.60423e-21
ENSG00000112096	NA	LncRNA	14776.1	3.25175	2.80248e-07	9.9696e-06
ENSG00000167851	CD300A	protein_coding	167.264	3.25141	8.11668e-07	2.35919e-05
ENSG00000213891	RPL3P6	protein_coding	10.6821	3.2514	6.41727e-05	0.000853169
ENSG00000123095	BHLHE41	protein_coding	89.8232	3.25046	3.46522e-05	0.000517341
ENSG00000205269	TMEM170B	protein_coding	90.2194	3.24858	1.77191e-19	6.91576e-16
ENSG00000171631	P2RY6	protein_coding	23.3382	3.24615	0.000487264	0.00440667
ENSG00000138135	CH25H	protein_coding	8.84554	3.2454	7.73692e-05	0.000990536
ENSG00000182578	CSF1R	protein_coding	343.097	3.24434	1.54339e-07	6.1338e-06
ENSG00000090530	P3H2	protein_coding	14.0089	3.24396	6.61264e-05	0.000871509
ENSG00000162512	SDC3	protein_coding	125.267	3.24313	8.5972e-06	0.00016538
ENSG00000157613	CREB3L1	protein_coding	14.5497	3.24291	0.000464877	0.00424147
ENSG00000205517	RGL3	protein_coding	12.1833	3.24198	0.00048013	0.00436091
ENSG00000049759	NEDD4L	protein_coding	488.327	3.2412	8.16692e-06	0.00015881
ENSG00000112137	PHACTR1	protein_coding	260.264	3.23934	2.52556e-07	9.16706e-06
ENSG00000146950	SHROOM2	protein_coding	11.0756	3.2377	0.00102975	0.00799937
ENSG00000129993	CBFA2T3	protein_coding	84.8642	3.23737	2.65922e-07	9.57206e-06
ENSG00000128567	PODXL	protein_coding	193.406	3.23545	1.33778e-07	5.47968e-06
ENSG00000228981	RPS2 pseudogene	Processed pseudogene	17.6945	3.23472	1.27754e-07	5.3126e-06
ENSG00000136848	DAB2IP	protein_coding	113.839	3.23394	0.000161051	0.00180109
ENSG00000235776	RPL7AP70	protein_coding	60.3754	3.23315	1.46384e-07	5.90746e-06
ENSG00000107249	GLIS3	protein_coding	47.6221	3.23225	5.84313e-05	0.00078718
ENSG00000154721	JAM2	protein_coding	36.2521	3.2318	3.17256e-09	2.79605e-07
ENSG00000135083	CCNJL	protein_coding	13.9035	3.23051	0.000309934	0.00306468
ENSG00000256167	ATF4P4	protein_coding	21.8789	3.23046	3.25005e-05	0.000490578
ENSG00000139263	LRIG3	protein_coding	33.6857	3.22955	0.000585369	0.00510791
ENSG00000230777	RPS29P5	protein_coding	27.8172	3.22913	3.5739e-06	7.94488e-05
ENSG00000257790	EIF4A1P4	protein_coding	17.1921	3.22886	7.43331e-05	0.000960215
ENSG00000229132	EIF4A1P10	protein_coding	95.1374	3.22863	2.54756e-07	9.23103e-06
ENSG00000238166	TBC1D2B pseudogene	Processed pseudogene	2.3708	3.2282	0.000309846	0.00306468
ENSG00000135929	CYP27A1	protein_coding	139.285	3.22639	1.90873e-05	0.000317785
INGMG_lincRNAs_TIL_001174	NA	LncRNA	39.5149	3.22279	5.06082e-05	0.0007024
ENSG00000035862	TIMP2	protein_coding	1118.56	3.22258	3.67026e-07	1.22736e-05
ENSG00000167693	NXN	protein_coding	46.0781	3.21628	1.79505e-08	1.10956e-06
ENSG00000000003	TSPAN6	protein_coding	15.7267	3.21365	2.20794e-06	5.3242e-05
ENSG00000198598	MMP17	protein_coding	19.7683	3.21047	0.000429745	0.00397867
ENSG00000075391	RASAL2	protein_coding	92.0762	3.21043	0.000109064	0.00130404
ENSG00000149418	ST14	protein_coding	243.333	3.20816	7.6147e-06	0.000150319
ENSG00000219023	RPS15AP19	protein_coding	61.7201	3.20775	2.54698e-06	6.00916e-05
ENSG00000165801	ARHGEF40	protein_coding	119.452	3.20641	1.4149e-06	3.68158e-05
ENSG00000233762	RPS15P4	protein_coding	155.091	3.2051	1.25764e-07	5.2378e-06
ENSG00000120738	EGR1	protein_coding	2168.82	3.20395	5.11689e-05	0.000708558
ENSG00000257043	SRSF3P1	protein_coding	8.35384	3.19819	0.000955949	0.00755277
ENSG00000168491	CCDC110	protein_coding	7.41991	3.19352	0.000191267	0.00206383
ENSG00000101384	JAG1	protein_coding	154.892	3.19198	2.76349e-05	0.000430207
ENSG00000187498	COL4A1	protein_coding	143.967	3.18913	5.14439e-05	0.000710565
ENSG00000133818	RRAS2	protein_coding	621.107	3.18869	3.61205e-10	5.03495e-08
ENSG00000177596	NA	LncRNA	7.38762	3.18855	0.00115668	0.00876847
ENSG00000176170	SPHK1	protein_coding	204.218	3.18838	2.35639e-06	5.63739e-05
ENSG00000143184	XCL1	protein_coding	66.5524	3.18779	7.36944e-05	0.000953316
ENSG00000197358	BNIP3P1	protein_coding	10.3431	3.18299	0.00104736	0.0081116
ENSG00000213412	HNRNPA1P33	protein_coding	8.37519	3.18097	0.000720336	0.00605471
ENSG00000134363	FST	protein_coding	47.0205	3.1792	5.37008e-05	0.000735787
ENSG00000095585	BLNK	protein_coding	63.4353	3.17406	3.26804e-05	0.000492478
ENSG00000165168	CYBB	protein_coding	633.565	3.17276	2.23173e-06	5.36544e-05
ENSG00000060138	YBX3	protein_coding	905.609	3.17254	1.51275e-06	3.89388e-05
ENSG00000213430	HSPD1P1	protein_coding	33.6775	3.17234	1.52427e-05	0.000264242
ENSG00000213757	RPS3AP20	protein_coding	65.6002	3.16931	6.01481e-06	0.000124776
ENSG00000131724	IL13RA1	protein_coding	307.249	3.16796	5.28922e-07	1.68031e-05
ENSG00000241612	RPL21P46	protein_coding	15.9276	3.16694	0.000164683	0.00183313
ENSG00000173698	ADGRG2	protein_coding	18.9707	3.16689	0.000566679	0.00497341
ENSG00000109099	PMP22	protein_coding	159.668	3.16305	0.000148053	0.00168963
ENSG00000113758	DBN1	protein_coding	226.05	3.16033	5.50199e-07	1.72385e-05
ENSG00000234851	RPL23AP42	protein_coding	20.9837	3.16028	0.000200963	0.00215314
ENSG00000011201	ANOS1	protein_coding	12.4088	3.1593	0.000728527	0.00610368
ENSG00000241741	RPL7AP30	protein_coding	52.0304	3.1588	4.79679e-06	0.000102626
ENSG00000213598	RPL31P4	protein_coding	30.6019	3.1581	6.42565e-05	0.000853427
ENSG00000005471	ABCB4	protein_coding	29.9278	3.15622	3.36277e-05	0.00050425
ENSG00000102996	MMP15	protein_coding	59.9887	3.15382	1.58139e-05	0.000272174
ENSG00000188783	PRELP	protein_coding	4.86251	3.15335	0.000775814	0.0064172
ENSG00000161642	ZNF385A	protein_coding	163.277	3.15211	4.26326e-07	1.38005e-05
ENSG00000231006	RPL7P32	protein_coding	12.6865	3.14928	0.000712789	0.00601213
ENSG00000234335	RPS4XP11	protein_coding	13.4075	3.14832	0.000106564	0.00127862
ENSG00000163520	FBLN2	protein_coding	24.3131	3.14673	0.000100209	0.00121415
ENSG00000140022	STON2	protein_coding	10.1932	3.14511	0.000544405	0.00482756
ENSG00000122641	INHBA	protein_coding	269.502	3.14413	0.000495045	0.00446521
ENSG00000142173	COL6A2	protein_coding	1156.82	3.13885	5.85651e-10	7.0799e-08
ENSG00000006704	GTF2IRD1	protein_coding	97.8611	3.13808	3.0786e-08	1.68789e-06
ENSG00000181524	RPL24P4	protein_coding	157.628	3.13669	1.32143e-07	5.43715e-06
ENSG00000242100	RPL9P32	protein_coding	114.947	3.13641	2.37413e-05	0.000381103
ENSG00000124615	MOCS1	protein_coding	11.3548	3.13503	0.000150185	0.00170741
ENSG00000109089	CDR2L	protein_coding	31.9811	3.13414	3.10891e-05	0.000473722
ENSG00000143502	SUSD4	protein_coding	43.826	3.13341	1.36353e-10	2.34296e-08
INGMG_lincRNAs_TIL_001291	NA	LncRNA	55.1696	3.13135	8.93691e-08	4.04917e-06
ENSG00000240087	RPSAP12	protein_coding	53.6771	3.13045	1.27402e-06	3.40916e-05
INGMG_002151	NA	LncRNA	7.97943	3.12925	6.63136e-06	0.000134603
ENSG00000111199	TRPV4	protein_coding	18.1022	3.12844	0.00041294	0.00384538
ENSG00000135960	EDAR	protein_coding	22.3628	3.12777	8.36083e-05	0.0010552
ENSG00000246763	RGMB-AS1	LncRNA	3.27334	3.12654	0.000222071	0.00232638
ENSG00000178695	KCTD12	protein_coding	338.56	3.1264	5.01449e-10	6.34264e-08
ENSG00000140859	KIFC3	protein_coding	354.569	3.12614	5.25829e-05	0.000722281
ENSG00000227525	RPL7P6	protein_coding	13.2212	3.12595	0.00104502	0.00809956
ENSG00000070614	NDST1	protein_coding	162.896	3.12505	7.44146e-06	0.00014786
ENSG00000269028	NA	LncRNA	166.781	3.12012	2.99598e-08	1.65026e-06
ENSG00000198046	ZNF667	protein_coding	52.1679	3.11395	3.26422e-05	0.000492444
ENSG00000270504	PXDC1 pseudogene	Processed pseudogene	13.9792	3.11156	1.77939e-05	0.000300277
ENSG00000260464	NA	LncRNA	8.34801	3.11125	6.70892e-06	0.000135774
ENSG00000144810	COL8A1	protein_coding	10.6084	3.11002	0.000309766	0.00306468
ENSG00000163435	ELF3	protein_coding	262.61	3.10758	0.000448856	0.00411932
ENSG00000242660	RPL39 pseudogene	LncRNA	35.5353	3.10624	1.91543e-05	0.000318706
ENSG00000119681	LTBP2	protein_coding	206.144	3.10548	1.07827e-09	1.14184e-07
ENSG00000166394	CYB5R2	protein_coding	52.0629	3.10539	2.77249e-05	0.000431362
ENSG00000165521	EML5	protein_coding	38.8137	3.10293	1.51188e-09	1.46475e-07
ENSG00000116962	NID1	protein_coding	86.2657	3.10091	0.000126759	0.00147999
ENSG00000114251	WNT5A	protein_coding	73.1014	3.0996	0.00108224	0.0083149
ENSG00000230508	RPL19P21	protein_coding	52.1917	3.09539	0.000195741	0.00210545
ENSG00000178538	CA8	protein_coding	5.98225	3.09534	0.00127899	0.00949805
INGMG_002199	NA	LncRNA	2.61549	3.09522	0.00125987	0.0093739
ENSG00000073060	SCARB1	protein_coding	208.38	3.09383	9.50384e-08	4.24967e-06
ENSG00000134955	SLC37A2	protein_coding	148.761	3.09363	9.85976e-08	4.35184e-06
ENSG00000139132	FGD4	protein_coding	88.4324	3.09256	1.41361e-05	0.000248286
ENSG00000164056	SPRY1	protein_coding	195.659	3.08957	8.67742e-08	3.98447e-06
ENSG00000172915	NBEA	protein_coding	50.8486	3.08939	2.65679e-06	6.22523e-05
ENSG00000178053	MLF1	protein_coding	110.224	3.08871	6.50673e-06	0.000132764
ENSG00000169891	REPS2	protein_coding	15.9139	3.08835	6.08185e-06	0.000125785
ENSG00000066336	SPI1	protein_coding	228.168	3.08766	2.22709e-05	0.000360677
ENSG00000136235	GPNMB	protein_coding	466.66	3.08549	9.84337e-06	0.000183445
ENSG00000075461	CACNG4	protein_coding	16.1305	3.08544	0.000798273	0.0065514
ENSG00000077782	FGFR1	protein_coding	1013.12	3.08508	2.48546e-07	9.1029e-06
ENSG00000133138	TBC1D8B	protein_coding	26.8959	3.08446	2.96997e-06	6.80155e-05
ENSG00000249855	EEF1A1P19	protein_coding	279.538	3.08253	1.1172e-06	3.0604e-05
ENSG00000116141	MARK1	protein_coding	10.8784	3.08129	2.27347e-05	0.000367101
ENSG00000185633	NDUFA4L2	protein_coding	50.5186	3.08076	0.000529571	0.00472669
ENSG00000155760	FZD7	protein_coding	64.8632	3.08021	6.1211e-07	1.88115e-05
ENSG00000151846	PABPC3	protein_coding	154.305	3.08014	3.5319e-06	7.87714e-05
ENSG00000187554	TLR5	protein_coding	155.568	3.07987	1.68105e-05	0.000285977
ENSG00000166770	ZNF667-AS1	LncRNA	30.6533	3.07887	0.000395673	0.00371612
ENSG00000216490	IFI30	protein_coding	24.9291	3.0747	3.09773e-07	1.07537e-05
ENSG00000121316	PLBD1	protein_coding	47.6887	3.07444	1.6079e-05	0.000275766
ENSG00000135540	NHSL1	protein_coding	39.6043	3.07409	4.48514e-05	0.000638554
ENSG00000143545	RAB13	protein_coding	170.437	3.07386	6.52115e-06	0.000132959
ENSG00000247627	MTND4P12	protein_coding	384.36	3.06707	9.03177e-06	0.000171868
ENSG00000219607	PPP1R3G	protein_coding	12.378	3.06328	0.000647723	0.00553706
ENSG00000236439	RPS27P8	protein_coding	97.1798	3.06269	5.3709e-06	0.000113487
ENSG00000254162	NA	LncRNA	21.8989	3.06233	6.62171e-05	0.000872284
ENSG00000258427	RMB8AP1	protein_coding	12.7147	3.06182	0.000552341	0.00487893
ENSG00000136636	KCTD3	protein_coding	101.622	3.06163	4.11328e-06	8.97594e-05
ENSG00000154027	AK5	protein_coding	21.5564	3.0583	5.54285e-06	0.000116365
ENSG00000185022	MAFF	protein_coding	620.351	3.05794	1.17064e-06	3.17924e-05
ENSG00000174123	TLR10	protein_coding	69.2338	3.05578	6.67488e-05	0.00087591
ENSG00000237758	BANF1P3	protein_coding	17.0737	3.05389	0.000202503	0.00216285
ENSG00000158528	PPP1R9A	protein_coding	10.9485	3.05324	0.00122738	0.00918973
ENSG00000067141	NEO1	protein_coding	276.417	3.05237	1.34306e-08	8.76243e-07
ENSG00000142192	APP	protein_coding	2469.56	3.0506	9.4802e-10	1.0402e-07
ENSG00000213553	RPLP0P6	protein_coding	409.547	3.05015	9.33374e-09	6.57235e-07
ENSG00000157985	AGAP1	protein_coding	83.9778	3.04624	4.20735e-07	1.36519e-05
ENSG00000226855	RPSAP17	protein_coding	52.4391	3.04594	1.18688e-05	0.000214747
ENSG00000216866	RPS2P55	protein_coding	38.6267	3.04565	9.48719e-07	2.66941e-05
ENSG00000175170	FAM182B	protein_coding	2.58995	3.04425	0.000855729	0.00692107
INGMG_lincRNAs_TIL_001390	NA	LncRNA	142.78	3.042	4.14125e-05	0.000598008
ENSG00000100626	GALNT16	protein_coding	18.0492	3.0418	0.000439407	0.00405576
ENSG00000150938	CRIM1	protein_coding	911.657	3.04063	2.24907e-08	1.30738e-06
ENSG00000087076	HSD17B14	protein_coding	31.0562	3.04039	1.28348e-06	3.42776e-05
ENSG00000105472	CLEC11A	protein_coding	13.7949	3.03902	6.34233e-05	0.000844439
ENSG00000162373	BEND5	protein_coding	25.9062	3.03892	2.76967e-06	6.44986e-05
ENSG00000148143	ZNF462	protein_coding	73.563	3.03759	0.000279771	0.00282052
ENSG00000239887	C1orf226	protein_coding	21.0544	3.03734	0.000643152	0.00551388
ENSG00000057704	TMCC3	protein_coding	66.3799	3.03514	2.78706e-05	0.000433383
ENSG00000139832	RAB20	protein_coding	104.895	3.03413	2.74077e-08	1.54075e-06
ENSG00000238084	SDHD pseudogene	Processed pseudogene	5.15833	3.03349	0.000151704	0.00171837
ENSG00000164124	TMEM144	protein_coding	10.3786	3.03179	0.000370506	0.0035295
ENSG00000275395	FCGBP	protein_coding	104.964	3.03169	4.66114e-06	0.000100049
ENSG00000148429	USP6NL	protein_coding	214.635	3.03105	1.0742e-08	7.37391e-07
ENSG00000065833	ME1	protein_coding	28.2197	3.02978	1.90532e-05	0.000317482
ENSG00000242899	RPL7P16	protein_coding	7.84333	3.02663	0.000915206	0.00731763
ENSG00000140450	ARRDC4	protein_coding	95.0657	3.02612	2.02969e-08	1.21342e-06
ENSG00000006118	TMEM132A	protein_coding	129.533	3.02578	6.77175e-05	0.000885474
ENSG00000187653	TMSB4XP8	protein_coding	600.172	3.02323	3.50496e-07	1.18808e-05
ENSG00000233913	RPL10P9	protein_coding	602.451	3.02287	8.11397e-07	2.35919e-05
ENSG00000231684	EIF1P3	protein_coding	15.1738	3.02178	0.000253688	0.00259006
ENSG00000134571	MYBPC3	protein_coding	9.15378	3.02057	0.000741504	0.00618807
ENSG00000129295	DNAAF11	protein_coding	14.8393	3.02048	1.29283e-06	3.446e-05
ENSG00000156206	CFAP161	protein_coding	5.99366	3.01734	0.000105394	0.00126849
ENSG00000185585	OLFML2A	protein_coding	3.88162	3.01655	0.000602212	0.00522054
ENSG00000123689	G0S2	protein_coding	226.067	3.01624	0.000539319	0.00479023
ENSG00000155629	PIK3AP1	protein_coding	795.07	3.01624	1.17922e-07	5.03265e-06
ENSG00000238103	RPL9P7	protein_coding	50.8929	3.01522	3.46231e-08	1.88354e-06
ENSG00000272482	NA	LncRNA	3.91391	3.01459	3.17726e-05	0.000481452
ENSG00000162616	DNAJB4	protein_coding	1023.64	3.01411	1.09214e-06	3.00184e-05
ENSG00000137267	TUBB2A	protein_coding	327.053	3.01339	5.60765e-06	0.0001174
ENSG00000099377	HSD3B7	protein_coding	66.8716	3.01243	8.49526e-07	2.45006e-05
ENSG00000025039	RRAGD	protein_coding	81.0719	3.01199	1.03159e-10	1.91729e-08
ENSG00000259863	SH3RF3-AS1	LncRNA	9.60238	3.00989	3.49425e-06	7.82513e-05
ENSG00000102024	PLS3	protein_coding	366.878	3.00853	0.000230571	0.00240069
ENSG00000185760	KCNQ5	protein_coding	36.2702	3.00793	4.41461e-09	3.58963e-07
ENSG00000242992	FTH1P4	protein_coding	12.1451	3.0071	6.63203e-05	0.000873222
ENSG00000092068	SLC7A8	protein_coding	77.8527	3.00623	7.45692e-07	2.22171e-05
ENSG00000183762	KREMEN1	protein_coding	37.6348	3.00422	0.000248546	0.00254804
ENSG00000151014	NOCT	protein_coding	237.561	3.00419	5.34178e-07	1.69307e-05
ENSG00000213399	RPS2P17	protein_coding	25.1737	3.00388	2.52887e-06	5.97676e-05
ENSG00000135919	SERPINE2	protein_coding	444.67	3.0027	1.00594e-05	0.000186706
ENSG00000114757	PEX5L	protein_coding	79.1028	3.00217	0.000200179	0.00214642
ENSG00000243910	TUBA4B	protein_coding	14.4857	3.00042	0.000145296	0.00166377
ENSG00000026751	SLAMF7	protein_coding	555.015	2.9972	2.0511e-05	0.000337578
ENSG00000172985	SH3RF3	protein_coding	114.945	2.99668	3.69217e-09	3.09429e-07
ENSG00000176720	BOK	protein_coding	50.4385	2.99236	3.8461e-07	1.27215e-05
ENSG00000117322	CR2	protein_coding	40.2376	2.99123	0.00107999	0.0083065
ENSG00000037280	FLT4	protein_coding	319.195	2.99015	1.19209e-06	3.22466e-05
ENSG00000197859	ADAMTSL2	protein_coding	12.4971	2.98999	1.41102e-05	0.000248286
ENSG00000213881	NPM1P6	protein_coding	17.1276	2.98895	0.000133069	0.00154377
ENSG00000217026	RPL10P1	protein_coding	16.6659	2.98632	3.18279e-05	0.000482024
ENSG00000168994	PXDC1	protein_coding	186.782	2.98632	6.36675e-06	0.000130688
ENSG00000182636	NDN	protein_coding	83.9198	2.98575	0.000593459	0.00516037
ENSG00000240036	NA	Processed pseudogene	68.6698	2.98495	6.64214e-05	0.000873698
ENSG00000235297	FAUP1	protein_coding	27.9922	2.98363	2.49688e-05	0.000397073
ENSG00000228305	PRELID1P6	protein_coding	28.0337	2.98296	0.000201806	0.0021571
ENSG00000124575	H1-3	protein_coding	24.6191	2.97893	0.00132926	0.00981535
ENSG00000205133	TRIQK	protein_coding	59.1992	2.97401	0.000228976	0.00238773
ENSG00000105767	CADM4	protein_coding	73.6551	2.97275	3.003e-05	0.000460752
ENSG00000162490	DRAXIN	protein_coding	23.5098	2.97161	0.000245859	0.00252713
ENSG00000153234	NR4A2	protein_coding	2229.53	2.97148	2.39571e-05	0.000383665
ENSG00000224631	RPS27AP16	protein_coding	353.748	2.96976	9.78321e-07	2.74704e-05
ENSG00000279024	NA	TEC	2.68736	2.96971	0.000758237	0.00630234
ENSG00000283429	MIR1244-3	LncRNA	24.9885	2.96857	6.17704e-06	0.000127389
ENSG00000185641	RPS25 pseudogene	LncRNA	111.502	2.96842	4.61758e-06	9.92579e-05
ENSG00000115107	STEAP3	protein_coding	63.2603	2.96751	0.000431536	0.0039912
ENSG00000107104	KANK1	protein_coding	279.788	2.96679	1.15218e-07	4.9545e-06
ENSG00000139926	FRMD6	protein_coding	303.587	2.96532	1.19696e-06	3.23464e-05
ENSG00000058335	RASGRF1	protein_coding	37.9576	2.96456	0.00020123	0.00215516
ENSG00000185567	AHNAK2	protein_coding	99.3765	2.96308	0.000768778	0.00637444
ENSG00000187098	MITF	protein_coding	34.7065	2.96171	0.000191034	0.00206294
ENSG00000244405	ETV5	protein_coding	44.9317	2.96115	0.000702898	0.00594915
ENSG00000157227	MMP14	protein_coding	1341.05	2.96112	0.000657277	0.00560948
ENSG00000111817	DSE	protein_coding	1264.56	2.95577	0.000201349	0.00215558
ENSG00000020181	ADGRA2	protein_coding	16.4312	2.95503	0.000188482	0.00204022
ENSG00000072133	RPS6KA6	protein_coding	24.2274	2.95318	0.000118495	0.00140027
ENSG00000197256	KANK2	protein_coding	116.718	2.95292	6.20559e-05	0.000828656
ENSG00000146677	RPL32P18	protein_coding	132.659	2.95192	9.95288e-07	2.78324e-05
ENSG00000137491	SLCO2B1	protein_coding	157.534	2.95017	0.000251002	0.0025684
ENSG00000198435	NRARP	protein_coding	46.1195	2.94954	7.10634e-05	0.000924975
ENSG00000221955	SLC12A8	protein_coding	36.0919	2.94923	2.69137e-06	6.29066e-05
CABG_009528	NA	LncRNA	31.4313	2.9484	6.9759e-05	0.0009106
ENSG00000226084	RPL17P6	protein_coding	119.217	2.9478	1.15139e-06	3.14243e-05
ENSG00000237749	RPS27P9	protein_coding	21.1814	2.94595	0.000181927	0.00198658
ENSG00000112715	VEGFA	protein_coding	1385.83	2.94408	0.000695342	0.00589433
ENSG00000158715	SLC45A3	protein_coding	45.4561	2.94324	2.09841e-05	0.000342478
ENSG00000197965	MPZL1	protein_coding	668.704	2.94053	1.69356e-08	1.06445e-06
ENSG00000128965	CHAC1	protein_coding	87.4928	2.93639	4.28027e-05	0.000614511
ENSG00000131435	PDLIM4	protein_coding	125.161	2.93263	0.000663909	0.00565772
ENSG00000135046	ANXA1	protein_coding	3965.26	2.93194	4.96841e-06	0.000105966
ENSG00000103202	NME4	protein_coding	203.327	2.93065	1.61909e-09	1.54669e-07
ENSG00000057019	DCBLD2	protein_coding	146.655	2.92268	1.97652e-05	0.000327421
ENSG00000168734	PKIG	protein_coding	145.081	2.92241	2.05732e-08	1.22458e-06
ENSG00000158445	KCNB1	protein_coding	36.3184	2.92199	1.23041e-05	0.000221303
ENSG00000134986	NREP	protein_coding	35.8566	2.92196	8.57629e-06	0.000165125
ENSG00000145362	ANK2	protein_coding	19.9484	2.92016	0.000399889	0.00374222
ENSG00000102265	TIMP1	protein_coding	2372.76	2.91211	1.25701e-05	0.000225199
ENSG00000172116	CD8B	protein_coding	85.6141	2.90871	2.59172e-06	6.07797e-05
ENSG00000139292	LGR5	protein_coding	3.99455	2.90773	0.00100052	0.00781487
ENSG00000239719	RPL36A pseudogene	Processed pseudogene	20.3318	2.90757	7.55669e-06	0.000149606
ENSG00000254373	UQCRB pseudogene	Processed pseudogene	9.77028	2.90703	0.000146603	0.00167448
ENSG00000177855	CACYBPP2	protein_coding	78.2849	2.90338	5.81545e-05	0.000783838
ENSG00000095752	IL11	protein_coding	59.8466	2.90251	0.000541214	0.00480393
ENSG00000167601	AXL	protein_coding	338.107	2.9025	0.000127623	0.00148691
ENSG00000263563	UBBP4	protein_coding	102.104	2.90249	0.000203864	0.00217145
ENSG00000163909	HEYL	protein_coding	16.8407	2.90246	0.000483152	0.00438173
ENSG00000186399	GOLGA8R	protein_coding	4.67463	2.90093	0.000400968	0.00374781
ENSG00000249264	EEF1A1P9	protein_coding	593.433	2.90065	1.64351e-05	0.000280639
ENSG00000243824	RPL12P6	protein_coding	7.28724	2.90042	0.00118527	0.00894305
ENSG00000102098	SCML2	protein_coding	18.5938	2.89159	5.80947e-10	7.05424e-08
ENSG00000118257	NRP2	protein_coding	238.337	2.88998	8.41556e-05	0.00106033
ENSG00000172164	SNTB1	protein_coding	183.98	2.88874	1.53608e-13	9.7598e-11
ENSG00000136048	DRAM1	protein_coding	708.548	2.88659	2.57542e-05	0.000406253
ENSG00000144488	ESPNL	protein_coding	17.2464	2.88454	4.53737e-05	0.000645012
ENSG00000231769	NA	LncRNA	5.19866	2.88316	0.000725721	0.00608577
ENSG00000198478	SH3BGRL2	protein_coding	23.8986	2.88054	1.03546e-05	0.000191019
ENSG00000143375	CGN	protein_coding	129.471	2.87714	8.7154e-06	0.000166863
ENSG00000143842	SOX13	protein_coding	24.627	2.87328	6.21651e-05	0.000829579
ENSG00000140379	BCL2A1	protein_coding	430.032	2.87318	1.45571e-06	3.78056e-05
ENSG00000188820	CALHM6	protein_coding	18.8087	2.87093	0.000490619	0.00443114
ENSG00000144476	ACKR3	protein_coding	224.704	2.87041	1.34006e-06	3.53395e-05
ENSG00000250722	SELENOP	protein_coding	74.7184	2.86999	2.07723e-06	5.06713e-05
ENSG00000218713	RCC1 pseudogene	LncRNA	19.1062	2.86923	0.000960449	0.00757956
ENSG00000070087	PFN2	protein_coding	140.129	2.86796	5.35957e-07	1.69478e-05
ENSG00000130881	LRP3	protein_coding	19.1115	2.86615	2.27212e-05	0.0003671
ENSG00000116711	PLA2G4A	protein_coding	21.3146	2.86492	0.000643397	0.00551388
ENSG00000169439	SDC2	protein_coding	99.141	2.8605	0.000568669	0.00498607
ENSG00000069188	SDK2	protein_coding	50.2938	2.85935	0.000159939	0.00179086
ENSG00000072682	P4HA2	protein_coding	249.18	2.8579	0.000241095	0.00248752
ENSG00000109943	CRTAM	protein_coding	84.5941	2.85504	6.98833e-05	0.000911787
ENSG00000168386	FILIP1L	protein_coding	56.8433	2.85319	3.65415e-08	1.95372e-06
ENSG00000188153	COL4A5	protein_coding	106.727	2.85192	0.00126236	0.00938987
ENSG00000134531	EMP1	protein_coding	1007.32	2.8511	9.62232e-05	0.00117625
ENSG00000049130	KITLG	protein_coding	32.7948	2.85	0.000367972	0.0035127
ENSG00000235251	UBA2 pseudogene	Processed pseudogene	5.8402	2.84798	0.000399335	0.00373894
ENSG00000198744	MTCO3P12	protein_coding	429.132	2.84438	1.36367e-05	0.000241141
ENSG00000174705	SH3PXD2B	protein_coding	115.496	2.84193	0.000296022	0.00295169
ENSG00000264281	RPL41 pseudogene	Processed pseudogene	322.472	2.83832	1.22909e-07	5.16614e-06
ENSG00000224945	NA	LncRNA	3.61599	2.83746	0.000158674	0.00178107
ENSG00000172216	CEBPB	protein_coding	751.344	2.83687	6.28563e-07	1.92467e-05
ENSG00000197766	CFD	protein_coding	15.531	2.83505	0.000294008	0.00293589
ENSG00000116191	RALGPS2	protein_coding	286.853	2.83025	1.84508e-07	7.14015e-06
ENSG00000224126	UBE2SP2	protein_coding	18.3812	2.82902	0.000802757	0.00657804
ENSG00000150540	HNMT	protein_coding	36.7515	2.82771	0.000994423	0.00779141
ENSG00000136997	MYC	protein_coding	1361.52	2.82497	1.13526e-14	1.10773e-11
ENSG00000233476	EEF1A1P6	protein_coding	1315.23	2.82466	2.24226e-06	5.38319e-05
ENSG00000099139	PCSK5	protein_coding	39.2266	2.82094	4.29497e-05	0.000616297
ENSG00000129450	SIGLEC9	protein_coding	27.675	2.81781	0.000104551	0.00126112
ENSG00000261150	EPPK1	protein_coding	102.902	2.81509	2.16623e-08	1.27331e-06
ENSG00000261371	PECAM1	protein_coding	455.96	2.81045	1.63023e-05	0.000278958
INGMG_lincRNAs_TIL_000841	NA	LncRNA	6.07817	2.80993	0.000382451	0.00362056
ENSG00000232653	GOLGA8N	protein_coding	5.62878	2.80955	8.41278e-05	0.00106033
ENSG00000064300	NGFR	protein_coding	14.7262	2.80879	0.00115717	0.00876977
ENSG00000220842	RPL21P16	protein_coding	98.3177	2.80854	1.6948e-08	1.06445e-06
ENSG00000231434	HSP90AA3P	protein_coding	27.3053	2.80616	0.000813462	0.0066481
ENSG00000228929	RPS13P2	protein_coding	67.298	2.80598	6.2658e-07	1.9213e-05
ENSG00000263740	RN7SL4P	protein_coding	6.9177	2.80465	0.000329	0.00321366
ENSG00000184060	ADAP2	protein_coding	42.6717	2.80124	1.33184e-05	0.00023736
ENSG00000137809	ITGA11	protein_coding	7.56118	2.80086	2.46338e-05	0.000392822
ENSG00000259000	DOCK11P1	protein_coding	8.68463	2.79757	0.000715092	0.00602623
ENSG00000144381	HSPD1	protein_coding	12359.5	2.79665	1.36542e-05	0.000241141
ENSG00000240914	RPL15P2	protein_coding	58.8894	2.79633	2.08536e-05	0.000341412
ENSG00000113070	HBEGF	protein_coding	261.916	2.79595	5.87943e-06	0.00012234
ENSG00000164283	ESM1	protein_coding	21.1504	2.79484	0.000174935	0.0019233
ENSG00000065320	NTN1	protein_coding	45.2867	2.79399	6.58708e-07	1.99518e-05
ENSG00000159714	ZDHHC1	protein_coding	19.7889	2.79074	0.000166139	0.0018459
ENSG00000073464	CLCN4	protein_coding	19.7563	2.79041	9.06403e-05	0.0011226
ENSG00000122035	RASL11A	protein_coding	75.9543	2.7886	2.53982e-05	0.000401562
ENSG00000114529	C3orf52	protein_coding	86.0113	2.78691	1.81683e-06	4.53311e-05
ENSG00000205189	ZBTB10	protein_coding	1003.24	2.78587	8.54868e-08	3.93196e-06
ENSG00000145990	GFOD1	protein_coding	210.737	2.78319	6.39534e-08	3.10832e-06
ENSG00000166532	RIMKLB	protein_coding	539.823	2.78225	1.07851e-13	7.55535e-11
ENSG00000181036	FCRL6	protein_coding	18.3177	2.78101	0.00034352	0.00332695
ENSG00000174628	IQCK	protein_coding	30.7037	2.77933	1.94481e-07	7.46266e-06
ENSG00000204556	NA	LncRNA	5.52911	2.77926	5.4158e-07	1.70455e-05
ENSG00000254759	NAP1L1P1	protein_coding	23.5624	2.7783	0.000145361	0.00166377
ENSG00000163814	CDCP1	protein_coding	151.944	2.77694	1.36357e-05	0.000241141
ENSG00000213362	FTH1P12	protein_coding	24.4312	2.77558	0.000126992	0.00148145
ENSG00000113269	RNF130	protein_coding	296.707	2.77186	3.21948e-18	9.77328e-15
ENSG00000175707	KDF1	protein_coding	9.84313	2.77122	3.23713e-05	0.000488945
ENSG00000196872	CRACDL	protein_coding	25.1205	2.77092	7.00262e-05	0.000913216
ENSG00000130203	APOE	protein_coding	519.635	2.77026	7.1211e-05	0.000926455
ENSG00000198142	SOWAHC	protein_coding	118.847	2.76931	1.14918e-05	0.000208478
ENSG00000118515	SGK1	protein_coding	2546.61	2.76823	7.18073e-06	0.00014362
ENSG00000151320	AKAP6	protein_coding	9.81493	2.76673	0.000255159	0.00260411
ENSG00000178458	H3P16	protein_coding	71.5982	2.76484	0.000304926	0.00302501
ENSG00000228502	EEF1A1P11	protein_coding	445.864	2.76147	2.89801e-06	6.68156e-05
ENSG00000228203	GRASLND	protein_coding	21.6957	2.76061	0.00129585	0.00959713
ENSG00000230006	ANKRD36BP2	protein_coding	43.6908	2.75996	0.000440904	0.00406682
ENSG00000202538	RNU4-2	protein_coding	8.50269	2.75973	0.000293385	0.00293289
ENSG00000138821	SLC39A8	protein_coding	3373.99	2.75901	9.95141e-05	0.00120729
ENSG00000169495	HTRA4	protein_coding	32.2061	2.75802	0.000945888	0.00750366
ENSG00000134202	GSTM3	protein_coding	83.1615	2.75798	1.34202e-05	0.000238877
ENSG00000250182	EEF1A1P13	protein_coding	872.442	2.75738	1.34339e-05	0.000238877
ENSG00000213253	RPL12P42	protein_coding	38.3241	2.75534	1.19028e-05	0.000215078
ENSG00000148737	TCF7L2	protein_coding	154.894	2.75274	2.8434e-05	0.000440388
ENSG00000136193	SCRN1	protein_coding	357.108	2.75265	2.11426e-08	1.25301e-06
ENSG00000144677	CTDSPL	protein_coding	49.5882	2.75249	0.000192846	0.0020784
ENSG00000217239	RPL34P16	protein_coding	10.111	2.75118	0.000847778	0.00686896
ENSG00000226221	RPL26P19	protein_coding	107.601	2.74957	7.01839e-07	2.10252e-05
ENSG00000259051	HNRNPUP1	protein_coding	22.9243	2.7448	0.000359706	0.00345068
ENSG00000243014	PTMAP8	protein_coding	8.03384	2.74387	0.000906836	0.0072592
ENSG00000197520	FAM177B	protein_coding	37.2482	2.74318	1.139e-06	3.11186e-05
ENSG00000131831	RAI2	protein_coding	30.4514	2.73596	1.20591e-06	3.24918e-05
ENSG00000173546	CSPG4	protein_coding	54.1852	2.733	1.39028e-06	3.62787e-05
ENSG00000035720	STAP1	protein_coding	118.469	2.73283	6.19168e-05	0.000827203
ENSG00000229638	RPL4P4	protein_coding	317.804	2.72779	7.59587e-07	2.25818e-05
ENSG00000198353	HOXC4	protein_coding	23.6308	2.72764	4.75479e-06	0.000101807
ENSG00000230929	RPLP1 pseudogene	Processed pseudogene	2.18984	2.72639	0.000756762	0.00629391
ENSG00000214535	RPS15AP1	protein_coding	101.916	2.72198	9.83224e-05	0.00119549
ENSG00000100154	TTC28	protein_coding	93.2152	2.72148	9.09338e-06	0.000172648
ENSG00000212747	RTL8B	protein_coding	9.92245	2.72021	0.000757259	0.00629613
ENSG00000213866	YBX1P10	protein_coding	55.4121	2.71966	1.34792e-06	3.54783e-05
ENSG00000166924	NYAP1	protein_coding	12.4178	2.71955	0.000896328	0.00718984
ENSG00000128594	LRRC4	protein_coding	18.2242	2.71826	0.000656715	0.00560691
ENSG00000067840	PDZD4	protein_coding	28.879	2.71685	0.000163687	0.00182535
ENSG00000242732	RTL5	protein_coding	76.3152	2.71471	2.02534e-07	7.68532e-06
ENSG00000197580	BCO2	protein_coding	117.39	2.71372	6.10493e-05	0.000817211
INGMG_002623	NA	LncRNA	18.619	2.71218	9.41807e-06	0.00017709
ENSG00000072195	SPEG	protein_coding	255.649	2.71201	0.00013102	0.00152392
ENSG00000106633	GCK	protein_coding	3.55416	2.71161	0.00101902	0.00792501
ENSG00000228205	RPS3P3	protein_coding	78.3412	2.70962	8.79279e-06	0.000168227
ENSG00000104808	DHDH	protein_coding	27.2549	2.70935	0.000318728	0.00313011
ENSG00000225912	RPL26P36	protein_coding	40.7839	2.70688	0.000453961	0.00416197
ENSG00000240395	RPL5P23	protein_coding	29.1188	2.70663	2.47676e-05	0.000394563
ENSG00000226608	FTLP3	protein_coding	119.025	2.70501	9.14989e-06	0.00017348
ENSG00000242445	RPL7AP11	protein_coding	22.4003	2.7047	0.000107002	0.00128276
ENSG00000166068	SPRED1	protein_coding	191.917	2.70094	4.0146e-05	0.000584359
ENSG00000128283	CDC42EP1	protein_coding	85.0539	2.69725	0.000926475	0.00738611
ENSG00000227077	RPS28 pseudogene	Processed pseudogene	32.4536	2.69553	0.000199548	0.0021405
ENSG00000163508	EOMES	protein_coding	157.894	2.69548	5.62527e-05	0.000764237
ENSG00000158869	FCER1G	protein_coding	272.9	2.69465	0.000332158	0.00323872
ENSG00000100321	SYNGR1	protein_coding	37.0056	2.69155	8.3617e-05	0.0010552
ENSG00000121089	NACA3P	protein_coding	53.0249	2.69082	9.4833e-06	0.000177949
ENSG00000124145	SDC4	protein_coding	4427.89	2.68904	0.000710665	0.00600262
ENSG00000261342	NA	LncRNA	15.4071	2.68898	0.000405603	0.00378466
ENSG00000026559	KCNG1	protein_coding	14.4175	2.68607	0.000464961	0.00424147
ENSG00000215030	RPL13P12	protein_coding	1263.14	2.68547	0.00112284	0.00856901
ENSG00000244073	RPS4XP6	protein_coding	25.5623	2.68356	8.9742e-05	0.00111447
ENSG00000072110	ACTN1	protein_coding	1276.55	2.68155	7.60073e-11	1.47276e-08
ENSG00000163694	RBM47	protein_coding	231.391	2.68117	9.30948e-06	0.00017541
ENSG00000181649	PHLDA2	protein_coding	30.1677	2.68108	0.00016472	0.00183313
ENSG00000116574	RHOU	protein_coding	98.0462	2.67734	5.14981e-05	0.000710955
ENSG00000111341	MGP	protein_coding	39.1609	2.67313	7.59648e-05	0.000976215
ENSG00000218227	RPL19 pseudogene	Processed pseudogene	105.535	2.6729	1.63907e-05	0.000280056
ENSG00000162711	NLRP3	protein_coding	93.1289	2.67177	6.6842e-05	0.000876712
ENSG00000145287	PLAC8	protein_coding	167.179	2.67119	1.16745e-10	2.09841e-08
ENSG00000164932	CTHRC1	protein_coding	29.7911	2.67106	3.94399e-06	8.65492e-05
ENSG00000183092	BEGAIN	protein_coding	43.8249	2.66915	0.000560208	0.0049288
ENSG00000146094	DOK3	protein_coding	141.777	2.66914	8.16026e-07	2.36673e-05
ENSG00000224646	RPS28P5	protein_coding	89.8314	2.66794	0.000271336	0.00274664
ENSG00000237991	RPL35P1	protein_coding	15.7766	2.66753	0.000120156	0.00141439
ENSG00000250966	H3P14	protein_coding	3.37677	2.66426	0.000639449	0.00548865
ENSG00000142279	WTIP	protein_coding	67.7269	2.66223	1.15515e-05	0.000209421
ENSG00000021762	OSBPL5	protein_coding	59.9672	2.66074	1.5093e-05	0.000262516
ENSG00000136573	BLK	protein_coding	213.137	2.66032	8.60171e-05	0.00107791
ENSG00000110811	P3H3	protein_coding	45.132	2.65853	8.36599e-07	2.42126e-05
ENSG00000136014	USP44	protein_coding	27.7756	2.65687	2.96281e-06	6.79085e-05
ENSG00000105650	PDE4C	protein_coding	11.8161	2.6507	0.00107003	0.00825365
CATG00000002383	NA	LncRNA	8.81673	2.64974	0.00121278	0.00910284
ENSG00000175906	ARL4D	protein_coding	47.4009	2.64748	1.31019e-05	0.000233968
ENSG00000164949	GEM	protein_coding	495.491	2.6462	6.1774e-05	0.000825698
ENSG00000234773	NA	Transcribed unprocessed pseudogene	26.5996	2.64578	1.3686e-05	0.000241548
ENSG00000236814	PSMC6 pseudogene	Processed pseudogene	31.2735	2.64459	7.47676e-06	0.000148238
ENSG00000272908	NA	LncRNA	9.91567	2.64437	0.00116212	0.00879996
ENSG00000132613	MTSS2	protein_coding	47.6827	2.64328	8.47895e-05	0.00106605
ENSG00000132704	FCRL2	protein_coding	122.466	2.64327	0.000359973	0.00345203
ENSG00000161921	CXCL16	protein_coding	447.779	2.64326	0.000153361	0.00173139
ENSG00000242067	RPL9P28	protein_coding	21.3945	2.64089	0.000585908	0.00511099
ENSG00000152056	AP1S3	protein_coding	203.089	2.64086	2.29706e-05	0.000370691
ENSG00000184867	ARMCX2	protein_coding	199.956	2.63856	3.6035e-08	1.93808e-06
ENSG00000108387	SEPTIN4	protein_coding	17.0495	2.63718	8.89491e-05	0.00110615
ENSG00000283566	NA	Processed pseudogene	16.2492	2.63663	0.00107142	0.00826199
ENSG00000263179	HNRNPCP4	protein_coding	13.9213	2.63646	0.00105327	0.00814736
ENSG00000137261	KIAA0319	protein_coding	11.2771	2.63626	1.12591e-05	0.000205273
ENSG00000184545	DUSP8	protein_coding	106.121	2.63587	1.61891e-06	4.11445e-05
ENSG00000160111	CPAMD8	protein_coding	11.7787	2.63504	1.01488e-05	0.000187846
ENSG00000158321	AUTS2	protein_coding	235.092	2.63481	1.97745e-05	0.000327421
ENSG00000139946	PELI2	protein_coding	210.129	2.63457	6.56646e-06	0.000133683
ENSG00000151376	ME3	protein_coding	52.3689	2.63373	7.5197e-05	0.000969998
ENSG00000222014	RAB6C	protein_coding	9.45792	2.63092	0.000605237	0.00523708
ENSG00000142552	RCN3	protein_coding	37.048	2.63037	3.3325e-08	1.81731e-06
ENSG00000147180	ZNF711	protein_coding	27.0709	2.6291	2.33743e-05	0.000376094
ENSG00000151491	EPS8	protein_coding	91.1268	2.62407	5.70436e-05	0.00077306
ENSG00000174233	ADCY6	protein_coding	69.6504	2.6227	0.00105738	0.00817043
ENSG00000104870	FCGRT	protein_coding	399.821	2.62196	3.07597e-07	1.07181e-05
ENSG00000231966	LINC02818	protein_coding	10.7785	2.61955	0.000123521	0.00145024
ENSG00000182230	NA	LncRNA	200.165	2.61861	5.65828e-05	0.000767576
ENSG00000158220	ESYT3	protein_coding	10.1662	2.61752	0.000317558	0.00312311
ENSG00000206228	HNRNPA1P4	protein_coding	80.0469	2.61674	0.000431944	0.00399362
ENSG00000227376	FTH1P16	protein_coding	40.7136	2.61663	6.65848e-05	0.000874597
ENSG00000234009	RPL5P34	protein_coding	162.684	2.61626	2.09e-07	7.90869e-06
ENSG00000236801	RPL24P8	protein_coding	40.9012	2.61624	2.54042e-05	0.000401562
INGMG_002543	NA	LncRNA	58.5822	2.61602	0.000227972	0.00237999
ENSG00000006016	CRLF1	protein_coding	17.2416	2.61128	0.000174791	0.00192249
ENSG00000112773	TENT5A	protein_coding	654.306	2.61125	3.93053e-05	0.000574872
ENSG00000242071	RPL7AP6	protein_coding	191.455	2.61012	3.61408e-07	1.21452e-05
ENSG00000213305	HNRNPCP6	protein_coding	10.87	2.60707	0.000857305	0.00693177
ENSG00000228887	EEF1DP1	protein_coding	42.9586	2.60607	1.75629e-05	0.000297112
ENSG00000214485	RPL7P1	protein_coding	80.4714	2.60554	8.91091e-07	2.54394e-05
ENSG00000157827	FMNL2	protein_coding	320.301	2.60541	1.35449e-05	0.000239986
ENSG00000117411	B4GALT2	protein_coding	159.08	2.60356	7.89851e-05	0.00100745
ENSG00000226564	FTH1P20	protein_coding	50.5899	2.60226	0.000190804	0.00206127
ENSG00000234797	RPS3AP6	protein_coding	346.696	2.60123	1.46125e-06	3.78773e-05
ENSG00000164292	RHOBTB3	protein_coding	124.224	2.59993	4.74795e-05	0.000668654
ENSG00000101493	ZNF516	protein_coding	109.17	2.59971	7.92204e-12	2.2783e-09
ENSG00000236992	RPL12P12	protein_coding	25.7164	2.59274	0.000996195	0.00779629
ENSG00000184500	PROS1	protein_coding	46.8578	2.59059	0.00120979	0.00908538
ENSG00000178715	RPS16 pseudogene	Processed pseudogene	235.11	2.58933	2.76074e-05	0.000430085
ENSG00000114450	GNB4	protein_coding	190.654	2.58898	3.35474e-06	7.54361e-05
ENSG00000205763	RP9P	protein_coding	60.0088	2.5886	2.53099e-05	0.000400633
ENSG00000018280	SLC11A1	protein_coding	333.264	2.58776	0.00127376	0.00946431
ENSG00000257446	ZNF878	protein_coding	9.95109	2.58741	6.60711e-05	0.000871201
ENSG00000144959	NCEH1	protein_coding	321.254	2.584	2.67379e-05	0.000418869
ENSG00000101194	SLC17A9	protein_coding	171.244	2.58359	3.21167e-07	1.10651e-05
ENSG00000240376	RPS8 pseudogene	LncRNA	33.5431	2.58275	1.10285e-07	4.79031e-06
ENSG00000157557	ETS2	protein_coding	890.924	2.5824	2.32036e-07	8.63684e-06
ENSG00000155465	SLC7A7	protein_coding	165.108	2.58138	5.23444e-06	0.000110861
ENSG00000128266	GNAZ	protein_coding	17.3535	2.58128	6.82132e-07	2.05474e-05
ENSG00000229567	RPL39 pseudogene	LncRNA	27.5022	2.57841	0.000905595	0.00725352
ENSG00000168389	MFSD2A	protein_coding	140.635	2.57738	8.60484e-05	0.00107791
[truncated: 1,364 more rows]

## Sheet: Table S2
Supplementary Table S2. List of genes used for Ribosomal Gene Score (RPG) calculation
ENSEMBL_GENE_ID	GENE_NAME	Description	Functional category
ENSG00000137154	RPS6	ribosomal protein S6	40S Ribosomal Protein
ENSG00000138326	RPS24	ribosomal protein S24	40S Ribosomal Protein
ENSG00000182774	RPS17	ribosomal protein S17	40S Ribosomal Protein
ENSG00000197728	RPS26	ribosomal protein S26	40S Ribosomal Protein
ENSG00000185088	RPS27L	ribosomal protein S27 like	40S Ribosomal Protein
ENSG00000147403	RPL10	ribosomal protein L10	60S Ribosomal Protein
ENSG00000163682	RPL9	ribosomal protein L9	60S Ribosomal Protein
ENSG00000108107	RPL28	ribosomal protein L28	60S Ribosomal Protein
ENSG00000114391	RPL24	ribosomal protein L24	60S Ribosomal Protein
ENSG00000136942	RPL35	ribosomal protein L35	60S Ribosomal Protein
ENSG00000229117	RPL41	ribosomal protein L41	60S Ribosomal Protein
ENSG00000063046	EIF4B	eukaryotic translation initiation factor 4B	Cap-binding Complex
ENSG00000106682	EIF4H	eukaryotic translation initiation factor 4H	Cap-binding Complex
ENSG00000075151	EIF4G3	eukaryotic translation initiation factor 4 gamma 3	Cap-binding Complex
ENSG00000141543	EIF4A3	eukaryotic translation initiation factor 4A3	Cap-binding Complex
ENSG00000151247	EIF4E	eukaryotic translation initiation factor 4E	Cap-binding Complex
ENSG00000161960	EIF4A1	eukaryotic translation initiation factor 4A1	Cap-binding Complex
ENSG00000070756	PABPC1	poly(A) binding protein cytoplasmic 1	mRNA processing
ENSG00000126524	SBDS	SBDS, ribosome maturation factor	Ribosome Biogenesis
ENSG00000071462	BUD23	BUD23, rRNA methyltransferase and ribosome maturation factor	Ribosome Biogenesis
ENSG00000100029	PES1	pescadillo ribosomal biogenesis factor 1	Ribosome Biogenesis
ENSG00000182117	NOP10	NOP10 ribonucleoprotein	rRNA Modification
ENSG00000130826	DKC1	dyskerin pseudouridine synthase 1	rRNA Modification
ENSG00000105202	FBL	fibrillarin	rRNA Modification
ENSG00000160208	RRP1B	ribosomal RNA processing 1B	rRNA Processing
ENSG00000001497	LAS1L	LAS1 like, ribosome biogenesis factor	rRNA Processing
ENSG00000242372	EIF6	eukaryotic translation initiation factor 6	Translation Initiation
ENSG00000173812	EIF1	eukaryotic translation initiation factor 1	Translation Initiation
ENSG00000104408	EIF3E	eukaryotic translation initiation factor 3 subunit E	Translation Initiation
ENSG00000130741	EIF2S3	eukaryotic translation initiation factor 2 subunit gamma	Translation Initiation
ENSG00000175390	EIF3F	eukaryotic translation initiation factor 3 subunit F	Translation Initiation
ENSG00000106263	EIF3B	eukaryotic translation initiation factor 3 subunit B	Translation Initiation
ENSG00000084623	EIF3I	eukaryotic translation initiation factor 3 subunit I	Translation Initiation
ENSG00000100129	EIF3L	eukaryotic translation initiation factor 3 subunit L	Translation Initiation
ENSG00000125977	EIF2S2	eukaryotic translation initiation factor 2 subunit beta	Translation Initiation
ENSG00000134001	EIF2S1	eukaryotic translation initiation factor 2 subunit alpha	Translation Initiation
ENSG00000148730	EIF4EBP2	eukaryotic translation initiation factor 4E binding protein 2	Translation Regulation
ENSG00000162302	RPS6KA4	ribosomal protein S6 kinase A4	Translation Signaling
ENSG00000120705	ETF1	eukaryotic translation termination factor 1	Translation Termination

## Sheet: Table S3
Supplementary Table S3. Differentially expressed genes between Puromycin high and Puromycin low iTregs.
Gene name	score	log2FC	pval	padj
AL049840.4	3.25649	20.8139	0.00113564	0.00487255
AL359715.1	3.22464	20.1641	0.00126953	0.00537198
B3GNT8	3.01547	3.57468	0.00257712	0.00999855
S100B	3.77541	3.54948	0.00016123	0.000861762
PTGS2	5.04292	3.54892	4.72652e-07	3.99672e-06
RASGRF2-AS1	4.2429	3.1927	2.23782e-05	0.000142826
AL356804.1	3.55834	2.78664	0.000375665	0.00183834
CLECL1	3.85367	2.63606	0.000117417	0.000649986
SLC16A2	3.6254	2.61378	0.000290562	0.00146291
TNS2	3.13069	2.5529	0.00175103	0.00709654
TMEM37	5.76565	1.96902	8.4441e-09	9.13152e-08
AC016813.1	4.87057	1.84131	1.13423e-06	9.07148e-06
EGR4	8.57329	1.78647	1.19973e-17	3.08077e-16
UBE2Q2L	3.75365	1.76767	0.000175497	0.000929288
TRBV7-7	3.66809	1.76418	0.000246024	0.00126226
C1orf194	3.07386	1.7587	0.00212043	0.00840508
PPIC	4.02337	1.71265	5.78988e-05	0.000341434
LINC02777	3.09142	1.70141	0.00199884	0.00797643
FFAR3	3.91907	1.67323	8.96171e-05	0.000509312
AC051619.5	3.42044	1.55327	0.000628278	0.00290134
GAS6	4.56986	1.54488	4.95235e-06	3.56054e-05
GALR2	4.39444	1.51654	1.12464e-05	7.61796e-05
OPCML	6.68958	1.50097	2.38588e-11	3.46618e-10
AL390755.1	3.24999	1.49309	0.00115884	0.00495823
MOB3B	3.41853	1.47677	0.000632702	0.00291765
CFAP73	10.5753	1.44137	5.71067e-26	2.47721e-24
AC008035.1	4.18683	1.43406	2.85857e-05	0.000178512
CYTL1	7.34427	1.42158	2.26886e-13	4.05123e-12
LINC01480	7.79201	1.41823	7.40754e-15	1.52685e-13
EGR3	10.7886	1.40487	5.93838e-27	2.68205e-25
RGS6	4.2886	1.38051	1.81877e-05	0.000118044
GOLT1A	4.18495	1.37995	2.88242e-05	0.000179928
TSPAN1	4.00444	1.36944	6.27209e-05	0.000367471
GPC3	5.83503	1.34135	5.58389e-09	6.209e-08
GNG8	17.5944	1.32457	4.88627e-68	8.24545e-66
PRDM5	4.31425	1.32425	1.62043e-05	0.000106248
PLEK2	8.03416	1.31923	1.07421e-15	2.38374e-14
AC112721.2	3.64427	1.31504	0.000269822	0.00136565
AC005842.1	19.6201	1.30743	9.64744e-84	2.51095e-81
DACH1	6.71267	1.287	2.03906e-11	2.98207e-10
SLC11A1	3.4478	1.27688	0.000568149	0.00265344
CXCL8	3.37781	1.27383	0.000734124	0.00331858
LINC02580	3.48163	1.25512	0.000501012	0.00237969
VIPR2	3.70443	1.24363	0.000213281	0.00110721
PTGIR	15.6096	1.21838	3.83717e-54	4.7519e-52
CLDN1	5.26221	1.21651	1.46044e-07	1.31998e-06
S100Z	4.31069	1.21276	1.64662e-05	0.000107736
APOD	11.2322	1.20986	4.6337e-29	2.31023e-27
REG4	3.81224	1.20123	0.000138741	0.000754963
NREP	12.3232	1.18788	1.38954e-34	8.81727e-33
IL24	3.25153	1.18573	0.0011526	0.00493291
LINC02086	3.39615	1.16811	0.000686718	0.00312822
LINC00672	3.75248	1.16305	0.000176321	0.000933328
DAZL	10.825	1.15665	4.03925e-27	1.83511e-25
SLC2A1-AS1	3.27205	1.14626	0.00107214	0.00462596
RPS4Y2	3.04491	1.13946	0.00233508	0.00914267
AC004816.2	4.7261	1.12909	2.32745e-06	1.76582e-05
TMC3-AS1	3.6163	1.12512	0.000300649	0.00150334
FCRL4	5.83141	1.1229	5.70864e-09	6.33853e-08
AF233439.1	3.61527	1.12006	0.000301883	0.00150902
IGHV3-74	3.16363	1.11954	0.00156393	0.00645235
NR4A1	15.4759	1.11557	2.87622e-53	3.42382e-51
GNG12	3.04729	1.11242	0.00231659	0.00908416
SIAH3	4.75172	1.10229	2.05345e-06	1.57428e-05
EGFL6	5.48485	1.09859	4.26518e-08	4.19578e-07
ARMH1	17.1323	1.09325	1.29902e-64	2.01493e-62
DNMT3B	3.393	1.09063	0.00069464	0.00315962
SMOX	7.63275	1.08543	2.56527e-14	4.98637e-13
AC124248.1	6.29137	1.07936	3.31485e-10	4.28115e-09
CTSL	19.7021	1.0767	2.87056e-84	7.60005e-82
AC022387.2	3.28957	1.07288	0.00100783	0.00438174
FST	6.01385	1.0532	1.89241e-09	2.23882e-08
AC096536.2	3.11985	1.05159	0.00181587	0.00732647
OLFM2	13.6652	1.04324	5.06638e-42	4.01027e-40
LKAAEAR1	4.6976	1.03987	2.67593e-06	2.00447e-05
STMND1	11.6601	1.0351	3.62803e-31	2.02589e-29
PLEKHA6	3.42708	1.02423	0.000613228	0.00283893
CD8B	17.6844	1.02414	1.20065e-68	2.0716e-66
ATP1B1	17.4882	1.02352	3.41974e-67	5.58655e-65
GRB7	3.96395	1.01598	7.43571e-05	0.000429582
AC115618.1	3.34984	1.01184	0.000812278	0.00361861
RAB31	5.81825	1.01083	6.17699e-09	6.81422e-08
TBC1D8	3.19177	1.00793	0.00141955	0.0059139
CYSLTR1	14.3637	1.00604	3.56075e-46	3.2164e-44
HOXA7	3.07488	1.00231	0.00211307	0.00838026
ADORA2B	4.22321	0.99962	2.43592e-05	0.000154252
CD200R1	4.97968	0.987451	6.51122e-07	5.393e-06
RAB38	8.2273	0.986524	2.22179e-16	5.15375e-15
TRAV24	3.2678	0.985826	0.00108837	0.00469202
NKAPL	3.21471	0.984265	0.00131095	0.00552139
STIM2-AS1	3.45105	0.981017	0.000561328	0.00262397
ALOX5AP	23.967	0.980277	6.91916e-122	6.25004e-119
RBPMS-AS1	3.16193	0.976276	0.00157311	0.00648744
EVA1A	5.08765	0.973282	3.70978e-07	3.17544e-06
IGF1	3.74717	0.971976	0.000180107	0.000950421
GMPR	5.3012	0.971764	1.18106e-07	1.08407e-06
SPRY1	8.02707	0.967309	1.14158e-15	2.52596e-14
AC087280.2	3.55997	0.966737	0.000373112	0.0018276
TTC24	3.41241	0.964762	0.000647278	0.00297504
PLEKHN1	4.07573	0.960743	4.63105e-05	0.000278117
PMCH	9.19005	0.953583	4.92901e-20	1.53218e-18
AC103702.2	6.70546	0.949456	2.14755e-11	3.13235e-10
NR4A2	11.0705	0.943181	2.77303e-28	1.33674e-26
TMEM91	6.44579	0.939491	1.21931e-10	1.64243e-09
LINC02754	4.83208	0.93705	1.37707e-06	1.08443e-05
PGGHG	5.20542	0.936801	1.98619e-07	1.75995e-06
COL18A1	4.88995	0.936447	1.02833e-06	8.26754e-06
AFF3	5.73111	0.931262	1.03551e-08	1.10733e-07
LTC4S	3.38132	0.928978	0.000724998	0.00328506
LTF	3.8062	0.922715	0.00014221	0.000771654
MT3	4.37755	0.921573	1.21538e-05	8.17138e-05
TRBV5-6	4.19481	0.921238	2.75999e-05	0.000172707
ARMCX5-GPRASP2	3.20108	0.919161	0.00137476	0.00576013
AL590666.2	3.14271	0.917434	0.00168008	0.00684875
ZNF215	5.69642	0.916065	1.26773e-08	1.34072e-07
AC090125.1	3.77833	0.894399	0.000159043	0.000850965
IL9R	14.5337	0.890294	3.1608e-47	2.90642e-45
RARRES2	3.90906	0.885608	9.34542e-05	0.00052877
AL445231.1	3.40993	0.869319	0.000653045	0.00299527
HIC1	3.45946	0.868405	0.000544152	0.00255535
IGHV1-3	3.39839	0.866849	0.000681215	0.00310869
CNTLN	6.67237	0.859509	2.68994e-11	3.87856e-10
LINC00920	5.55663	0.854301	2.84556e-08	2.8691e-07
AC006207.1	4.21553	0.854005	2.51976e-05	0.000159095
TCERG1L	3.11564	0.845825	0.0018421	0.00741474
ELL3	3.46806	0.844245	0.000527075	0.00248809
CCL20	3.76563	0.842593	0.000167416	0.000891106
AC018816.1	7.34507	0.842311	2.26501e-13	4.04906e-12
PAK1	19.8328	0.8381	3.1785e-85	8.7159e-83
PPP1R14B-AS1	7.89265	0.834787	3.36274e-15	7.14222e-14
SLA	17.8621	0.832934	7.61533e-70	1.39216e-67
CD52	24.3385	0.831576	5.5315e-125	6.06727e-122
BMF	6.0231	0.831267	1.79198e-09	2.12985e-08
SARDH	10.4166	0.829303	3.11874e-25	1.27371e-23
KCNK12	4.11528	0.827048	3.90632e-05	0.000237284
AC011893.1	7.69673	0.825653	1.56893e-14	3.14523e-13
LPCAT2	10.7819	0.82448	6.58719e-27	2.95768e-25
ATL1	3.96888	0.82309	7.28708e-05	0.000421947
EDA2R	3.36962	0.818098	0.000756432	0.00340739
CAMK2B	3.21769	0.817178	0.0012977	0.00547459
CRIP2	4.01646	0.816907	5.96297e-05	0.000350296
OXNAD1	19.0742	0.814699	5.60455e-79	1.30399e-76
SUOX	10.2974	0.80966	1.04664e-24	4.20739e-23
PDE6G	4.44022	0.808093	9.10987e-06	6.25179e-05
SMAD1	3.4524	0.806722	0.000558786	0.00261368
ADGRA3	3.76097	0.804662	0.000170513	0.000905393
QPCT	6.4176	0.803815	1.46752e-10	1.95788e-09
RBPMS	9.70968	0.798923	3.67312e-22	1.27324e-20
HCAR1	3.34387	0.797735	0.000830101	0.00368199
CD101	8.67773	0.792884	4.89176e-18	1.29068e-16
AP006621.3	8.92024	0.791527	5.74596e-19	1.63096e-17
LHX9	3.41244	0.787473	0.000647088	0.00297504
LINC00937	3.19783	0.786779	0.00139047	0.00581168
AC068587.4	6.66472	0.786735	2.84151e-11	4.08177e-10
DHDH	3.32497	0.785148	0.000888374	0.00390773
LIN7A	4.23033	0.781797	2.3601e-05	0.000150069
SOCS2	20.6162	0.781218	1.49245e-91	4.58361e-89
LGALSL	4.03834	0.778622	5.43571e-05	0.000322655
AC022182.2	7.22407	0.776988	5.54646e-13	9.54836e-12
AC013264.1	3.75729	0.773591	0.000173074	0.000917089
FOXRED2	3.81673	0.771034	0.000136289	0.000743465
GBGT1	4.21159	0.770267	2.5647e-05	0.000161739
KIAA1324	3.88912	0.76966	0.000101461	0.000569043
LRRN3	17.307	0.762309	1.2702e-65	1.99032e-63
SEC14L2	7.37271	0.760778	1.84923e-13	3.35263e-12
SMIM10	4.53115	0.758226	5.95485e-06	4.22368e-05
GSDME	7.25479	0.757469	4.41614e-13	7.68869e-12
MMP2	5.82967	0.756941	5.78364e-09	6.41253e-08
VNN2	5.24771	0.75337	1.58215e-07	1.42329e-06
ITGA2	4.81862	0.750724	1.4742e-06	1.15558e-05
CCR2	5.14845	0.746527	2.69427e-07	2.33879e-06
NFKBID	7.63865	0.742334	2.45495e-14	4.79011e-13
HRH2	8.88356	0.734688	7.99784e-19	2.22088e-17
BCL7A	4.3121	0.732719	1.63793e-05	0.000107212
EGR1	9.44068	0.731533	4.78207e-21	1.56909e-19
CD40LG	10.7069	0.729858	1.454e-26	6.47177e-25
IRF8	4.52569	0.728746	6.1138e-06	4.32444e-05
CAPG	22.6546	0.728446	6.56208e-109	3.05355e-106
SYP	4.8538	0.727543	1.23527e-06	9.78779e-06
CYP1B1	15.5091	0.726171	2.55074e-53	3.08419e-51
C2orf27A	9.97022	0.723461	2.88456e-23	1.08567e-21
TRAV36DV7	4.36931	0.722446	1.26232e-05	8.44996e-05
NDN	5.02337	0.715551	5.19321e-07	4.3673e-06
KIF26B	3.30107	0.711498	0.000967593	0.00422593
CLIC3	8.33265	0.710704	9.30699e-17	2.22268e-15
RHOBTB3	4.31234	0.710693	1.63628e-05	0.000107196
GPR35	5.22183	0.710526	1.81923e-07	1.61854e-06
NPW	8.13294	0.706	4.82715e-16	1.09979e-14
MYLPF	4.7659	0.702322	1.91509e-06	1.47557e-05
NDFIP2	22.2846	0.70125	9.4869e-106	3.83371e-103
CAMK1	14.4664	0.700646	9.079e-47	8.29864e-45
SPINK2	4.50375	0.69963	6.77758e-06	4.75018e-05
HPGD	5.20735	0.698992	1.96747e-07	1.74538e-06
LINC01597	3.92954	0.69512	8.58573e-05	0.000490303
NKD1	4.55473	0.695038	5.32954e-06	3.80123e-05
GSTA4	4.21085	0.692599	2.573e-05	0.00016213
EVI2A	13.901	0.691642	2.36485e-43	1.96295e-41
LRP5	3.23693	0.690958	0.00121339	0.00516532
ILDR2	3.236	0.690685	0.00121743	0.00518008
TXNRD3	3.22615	0.690045	0.00126003	0.00533767
NTRK1	4.51578	0.688617	6.40375e-06	4.51289e-05
SEMA7A	6.1243	0.687812	9.56201e-10	1.17093e-08
BCL2L11	13.3689	0.686273	2.86924e-40	2.17045e-38
CA2	3.73715	0.685685	0.00018748	0.000983584
LINC01431	3.33982	0.685056	0.000842509	0.00373163
LIMS2	11.5013	0.684836	2.3804e-30	1.29164e-28
GADD45G	14.9461	0.684798	1.02445e-49	1.07016e-47
RASAL1	3.67462	0.6843	0.000239857	0.00123405
CHRNA5	4.50952	0.681269	6.59698e-06	4.6363e-05
CDKN2C	9.86746	0.679695	8.0583e-23	2.91847e-21
CXCR6	8.76444	0.679489	2.30126e-18	6.25455e-17
ASB13	4.05261	0.678368	5.11572e-05	0.000304839
C1QTNF6	3.82253	0.678172	0.000133162	0.000727442
RGS10	26.8581	0.677037	6.124e-150	1.04489e-146
FUOM	13.379	0.676242	2.47312e-40	1.88942e-38
TNFSF13	6.12093	0.676094	9.76954e-10	1.19539e-08
MRPS6	23.7271	0.674873	7.93849e-119	5.80493e-116
AMOTL1	4.39011	0.673383	1.14874e-05	7.76067e-05
MGST2	11.1374	0.670125	1.39694e-28	6.83165e-27
GSEC	4.19782	0.667492	2.72562e-05	0.000170835
LIPE-AS1	3.10814	0.664299	0.00188991	0.00758927
EVA1C	6.10192	0.659983	1.10144e-09	1.34343e-08
AC084262.1	6.93679	0.659777	4.34866e-12	6.7795e-11
DHRS3	15.008	0.657813	4.09757e-50	4.40016e-48
ASAP1	5.05086	0.657214	4.50302e-07	3.81824e-06
LINC01684	5.31346	0.656296	1.10694e-07	1.0203e-06
KDELR3	3.57678	0.655147	0.000350165	0.00172954
FHL1	6.43911	0.654798	1.28034e-10	1.71862e-09
EVI5	6.16296	0.653705	7.50807e-10	9.26056e-09
PCBP3	3.78345	0.653511	0.000155921	0.000837763
LINC02482	4.375	0.652582	1.23162e-05	8.26606e-05
H2AFY2	4.0223	0.651124	5.81988e-05	0.00034294
MAN1C1	4.70457	0.65094	2.59232e-06	1.94278e-05
SERPINE2	4.35183	0.650125	1.36793e-05	9.09744e-05
DERL3	7.88589	0.649961	3.56898e-15	7.54894e-14
PLSCR1	11.2927	0.648893	2.55523e-29	1.29073e-27
ANKRD35	3.55389	0.647752	0.00038193	0.00186484
NFATC1	7.81241	0.645185	6.38379e-15	1.32472e-13
TMIGD2	10.2627	0.643744	1.55134e-24	6.20373e-23
TFPI	3.2961	0.639702	0.000984818	0.00429383
GNPDA1	14.7176	0.639039	2.65793e-48	2.58324e-46
KLHL25	5.08451	0.637895	3.77657e-07	3.23081e-06
CDKN2A	14.0264	0.635078	4.19343e-44	3.53815e-42
TRBV5-4	3.35484	0.633266	0.00079785	0.00356987
PIGZ	3.51828	0.631578	0.000436927	0.00210592
ITM2A	13.7552	0.628912	1.71589e-42	1.39414e-40
CHDH	3.88496	0.627455	0.000103229	0.000578113
BCL2A1	12.2301	0.627426	4.64964e-34	2.89068e-32
IGFLR1	15.0009	0.625462	4.63868e-50	4.94664e-48
E2F8	6.56121	0.623571	5.69539e-11	7.91479e-10
DHRS2	5.47068	0.622853	4.62923e-08	4.53358e-07
HYI	8.26404	0.617661	1.65769e-16	3.89823e-15
TXK	10.2268	0.61483	2.23905e-24	8.88447e-23
BSPRY	3.40361	0.614508	0.000668473	0.00305508
ZACN	5.38442	0.613492	7.48364e-08	7.09376e-07
FAR2	3.20847	0.611953	0.00134001	0.00562989
IQCH-AS1	4.68639	0.611566	2.82942e-06	2.1112e-05
C1orf53	5.77483	0.611279	8.01324e-09	8.69007e-08
RENBP	5.64899	0.611131	1.67416e-08	1.74059e-07
COTL1	21.1516	0.610177	2.7676e-95	9.23897e-93
COMTD1	14.156	0.610079	7.41644e-45	6.39814e-43
NCF1	7.69735	0.607809	1.57284e-14	3.14897e-13
CNPY4	5.94018	0.606559	2.97814e-09	3.41032e-08
FAM111B	9.75375	0.60506	2.42528e-22	8.52233e-21
CD200	8.90791	0.604687	6.50401e-19	1.82588e-17
AC012645.3	4.46598	0.604587	8.09397e-06	5.60627e-05
ZNF667-AS1	5.58094	0.600251	2.47635e-08	2.51834e-07
IRS2	7.93187	0.599845	2.48682e-15	5.34093e-14
FGL2	3.41643	0.596132	0.00063805	0.0029379
DGUOK-AS1	3.87216	0.595714	0.000108811	0.000606056
PGM1	6.55056	0.593063	6.12632e-11	8.47529e-10
AC012146.1	8.2476	0.592663	1.90241e-16	4.44647e-15
HAVCR2	5.61645	0.59238	2.0213e-08	2.08456e-07
TRAF3IP3	18.1754	0.591914	5.70446e-72	1.13763e-69
POLD1	7.21432	0.590923	5.9634e-13	1.01975e-11
ARRB1	5.28967	0.590238	1.26136e-07	1.15089e-06
STAP1	3.52058	0.589481	0.00043337	0.00209074
LINC002481	3.35058	0.589121	0.000810577	0.00361417
CD8B2	4.11346	0.588635	3.94037e-05	0.000239069
MLLT11	4.25632	0.587736	2.10416e-05	0.000134912
ID3	6.78174	0.586561	1.28107e-11	1.9155e-10
FTCDNL1	4.36655	0.585582	1.2799e-05	8.55274e-05
SYCE1L	5.69198	0.585472	1.30531e-08	1.37762e-07
TRIM73	3.32951	0.584314	0.000874462	0.00385537
TRAV39	3.07729	0.583476	0.00209625	0.00832644
VSIR	8.11856	0.58296	5.51537e-16	1.24918e-14
MXI1	4.06759	0.581819	4.80204e-05	0.000287486
CORO1B	17.5813	0.580578	1.54784e-67	2.55577e-65
ADD2	3.99428	0.579237	6.55317e-05	0.000382658
HIST1H3D	11.0764	0.578548	2.7769e-28	1.33674e-26
GRAP	4.66005	0.578302	3.21897e-06	2.38104e-05
NPTX1	3.84206	0.575919	0.000123012	0.000677777
CD27	14.0707	0.575484	2.47999e-44	2.11571e-42
KCNMB4	3.13248	0.575311	0.0017405	0.00706317
GADD45B	17.6738	0.5749	2.86097e-68	4.88145e-66
RNF144A-AS1	5.15917	0.573813	2.54689e-07	2.21712e-06
PRRG4	3.55629	0.573093	0.0003785	0.00185104
BICDL1	3.91463	0.572693	9.13718e-05	0.000517751
SEMA4A	4.79538	0.572218	1.65554e-06	1.28982e-05
CCDC74A	6.2498	0.570781	4.34219e-10	5.49701e-09
TMEM53	4.20204	0.570069	2.67684e-05	0.000168121
RHOU	6.18177	0.57006	6.67745e-10	8.29603e-09
BDH2	6.50169	0.568502	8.47753e-11	1.15614e-09
SDR42E1	5.38721	0.567817	7.38379e-08	7.01643e-07
GEM	5.9912	0.565581	2.17978e-09	2.53966e-08
RAD51B	5.09806	0.563359	3.51763e-07	3.01601e-06
CITED4	3.56804	0.563195	0.000362042	0.00178247
CREM	15.7451	0.562878	7.9879e-55	1.01374e-52
PIK3CD-AS2	4.85705	0.562838	1.21583e-06	9.65375e-06
ME3	4.81052	0.558309	1.53625e-06	1.20176e-05
TMEM156	5.96429	0.558292	2.57161e-09	2.97362e-08
FBLN7	8.78142	0.557908	2.01144e-18	5.49601e-17
CCDC57	11.4515	0.556728	4.312e-30	2.28328e-28
UBR5-AS1	3.64741	0.555952	0.000266778	0.00135202
UCP2	15.9843	0.55576	1.76201e-56	2.37345e-54
PAOX	4.97767	0.554974	6.58109e-07	5.445e-06
LINC01137	4.77546	0.553876	1.82795e-06	1.41197e-05
CDKN1A	7.91806	0.55377	2.76139e-15	5.90583e-14
TRABD2A	8.75349	0.552411	2.56191e-18	6.91402e-17
TMEM121	3.53897	0.552389	0.000404179	0.00196348
KHK	4.78122	0.551029	1.77668e-06	1.37583e-05
SESTD1	3.46871	0.550575	0.000525978	0.00248444
C21orf58	7.05178	0.549773	1.93242e-12	3.15012e-11
PXMP2	9.50147	0.54945	2.76625e-21	9.21444e-20
ALDH3A2	5.02475	0.548457	5.16293e-07	4.34421e-06
PDCD4-AS1	5.29999	0.546613	1.19454e-07	1.09578e-06
INAVA	3.11542	0.546099	0.00184408	0.00742076
MAP3K2-DT	7.31567	0.545166	2.83806e-13	5.02088e-12
AIF1	12.0724	0.54496	3.20932e-33	1.94792e-31
PRICKLE1	3.56418	0.543973	0.000367296	0.00180293
NPDC1	11.023	0.542893	5.00812e-28	2.35904e-26
AP000787.1	3.3943	0.54245	0.000691689	0.00314993
MFSD4A	3.4303	0.541617	0.000606281	0.00281101
CYP1A1	5.82198	0.541253	6.05239e-09	6.69118e-08
SRGAP3	4.78367	0.541251	1.75521e-06	1.36195e-05
TCEA3	3.76774	0.540229	0.000166075	0.000884273
NRGN	3.0263	0.540132	0.00248427	0.00966519
ALDOC	3.83006	0.53907	0.000129193	0.000707522
CENPV	7.4294	0.538787	1.215e-13	2.22909e-12
RILP	3.1813	0.537801	0.00147212	0.00610969
LINC02611	3.71286	0.537237	0.000206542	0.00107623
CTNNBIP1	7.40252	0.536674	1.48873e-13	2.71185e-12
EPS8L2	4.11044	0.53633	3.99206e-05	0.000241728
DMD	4.26226	0.536258	2.04863e-05	0.000131682
CD151	12.5912	0.534734	5.95989e-36	4.06756e-34
RECQL4	3.38651	0.534584	0.000711672	0.00322658
KCTD17	5.92336	0.53428	3.29963e-09	3.75965e-08
CYTH3	3.90742	0.533208	9.41604e-05	0.000531786
NUDT14	5.64737	0.531672	1.69083e-08	1.75673e-07
AC073896.2	4.14484	0.530484	3.44062e-05	0.000210663
FGF14-AS2	3.81117	0.530188	0.00013945	0.000758283
DUSP2	11.2353	0.528925	4.70427e-29	2.33782e-27
TP53I3	4.16822	0.528089	3.10479e-05	0.000192247
GFI1	7.17197	0.527714	8.14136e-13	1.37082e-11
AL080276.2	5.51384	0.527099	3.63344e-08	3.59736e-07
SLCO3A1	4.25022	0.526919	2.16243e-05	0.000138359
CCR5	3.56393	0.526273	0.000367731	0.00180411
C1orf159	4.03487	0.525656	5.52001e-05	0.000327027
SPATA20	5.14618	0.524528	2.72901e-07	2.36627e-06
RGL4	8.75684	0.524456	2.4884e-18	6.7393e-17
SIRPG	10.0261	0.523961	1.68483e-23	6.40402e-22
PAQR4	6.55793	0.523831	5.83553e-11	8.1022e-10
IFI27L1	8.28197	0.523743	1.43567e-16	3.38132e-15
FAM174B	3.72654	0.522988	0.000195581	0.00102363
FSD1	5.0591	0.521269	4.31465e-07	3.67272e-06
GINS2	11.6651	0.521225	3.75694e-31	2.09027e-29
NELL2	4.92822	0.521029	8.49346e-07	6.93384e-06
AREG	6.52778	0.520912	7.12526e-11	9.79548e-10
WDR34	8.4794	0.520769	2.71851e-17	6.77686e-16
BTLA	5.29537	0.520752	1.22403e-07	1.12083e-06
FAM153CP	4.36183	0.520425	1.30789e-05	8.72079e-05
HIST1H4C	11.3726	0.519218	1.03977e-29	5.41246e-28
ABI3	12.3658	0.518658	9.519e-35	6.22016e-33
DTNB	4.83321	0.517744	1.37128e-06	1.08098e-05
USP35	3.14477	0.517367	0.00166909	0.00681302
SAC3D1	9.13517	0.515507	8.32722e-20	2.51224e-18
CRIP1	15.4251	0.514798	1.31581e-52	1.50788e-50
SLC5A3	9.61803	0.514712	9.17571e-22	3.10357e-20
AC100810.1	8.12533	0.514697	5.25872e-16	1.19457e-14
MCM5	12.8267	0.514409	3.14596e-37	2.21602e-35
SLC25A10	4.48744	0.512133	7.321e-06	5.10541e-05
CASP1	6.51045	0.511213	8.01535e-11	1.09505e-09
ZNF524	8.25362	0.509889	1.82126e-16	4.27633e-15
FANCL	6.86307	0.509337	7.30936e-12	1.11907e-10
RLN2	4.56316	0.507193	5.12441e-06	3.66855e-05
PPOX	7.68112	0.507163	1.78775e-14	3.54228e-13
PPP1R14B	12.5056	0.506001	1.67943e-35	1.12617e-33
AGFG2	4.9195	0.504763	8.86952e-07	7.22165e-06
PKMYT1	8.70301	0.504138	3.95829e-18	1.05344e-16
NRM	9.18752	0.50363	5.2277e-20	1.61522e-18
PKIA	7.0718	0.503082	1.67748e-12	2.76092e-11
AC098487.1	3.06466	0.502286	0.002187	0.00863773
IBA57	4.07241	0.50171	4.70347e-05	0.000282245
DEAF1	3.95521	0.501086	7.71828e-05	0.000444568
DUSP4	16.8135	0.500688	5.31165e-62	7.919e-60
CCNE2	3.38979	0.500579	0.000703304	0.00319317
ANKRD26	9.17757	0.50048	5.71477e-20	1.75864e-18
SRD5A3	4.74753	0.498996	2.09861e-06	1.6057e-05
TMEM218	6.67522	0.498828	2.65794e-11	3.83603e-10
TRBC1	9.81426	0.498777	1.35628e-22	4.82108e-21
ITGAE	14.9311	0.495576	1.41753e-49	1.47079e-47
PHACTR2	7.47571	0.495437	8.60058e-14	1.59698e-12
NUCB2	10.436	0.492784	2.63759e-25	1.08879e-23
RBMS1	9.88965	0.492381	6.63944e-23	2.4333e-21
GALK1	8.70123	0.491758	4.03247e-18	1.07132e-16
CALHM2	3.65998	0.49132	0.000254065	0.00129701
C15orf61	9.06719	0.490922	1.56775e-19	4.62967e-18
B3GALNT1	3.18035	0.49047	0.00147719	0.00612741
AL392172.1	5.664	0.489681	1.53739e-08	1.61038e-07
COL6A2	3.35123	0.489605	0.000808723	0.00360696
ACAA2	14.8408	0.489379	5.26815e-49	5.25309e-47
RETREG1	5.684	0.48844	1.36901e-08	1.44188e-07
CMIP	3.29074	0.48835	0.0010042	0.00437018
FBXW11	7.3576	0.487769	2.08702e-13	3.74834e-12
S100A11	18.0439	0.486227	8.57682e-71	1.60617e-68
LINC00239	3.99027	0.486209	6.66454e-05	0.000388685
FANCC	3.11353	0.485874	0.00185591	0.00746448
BARD1	8.91007	0.485052	6.42022e-19	1.80566e-17
TMEM14C	15.5163	0.484471	2.61747e-53	3.14015e-51
PRR34-AS1	6.03363	0.484277	1.68271e-09	2.00308e-08
SYNJ2	6.06403	0.482797	1.39452e-09	1.67255e-08
ACVR1C	3.60768	0.481868	0.000311026	0.00155018
GLIDR	4.8249	0.480228	1.42878e-06	1.12227e-05
CRNDE	5.28419	0.479988	1.29979e-07	1.18104e-06
D2HGDH	4.01532	0.479874	5.9985e-05	0.000352114
GSTO1	18.6653	0.47965	1.75451e-75	3.74198e-73
TMEM107	6.99051	0.4776	2.99291e-12	4.77342e-11
RAB13	4.66833	0.476556	3.09207e-06	2.29714e-05
CKLF	15.9875	0.475695	2.14795e-56	2.86816e-54
ITGB7	4.7919	0.475572	1.68618e-06	1.31303e-05
PDLIM7	7.68311	0.47555	1.7665e-14	3.5047e-13
C22orf34	4.1124	0.475393	3.96027e-05	0.000240086
PDE4D	7.73017	0.474686	1.23167e-14	2.48862e-13
ADTRP	15.1044	0.474079	1.3913e-50	1.52606e-48
GCHFR	11.7499	0.473617	1.45272e-31	8.35506e-30
HEATR6	6.39353	0.473396	1.72503e-10	2.28555e-09
ECHS1	13.8917	0.472935	2.96657e-43	2.44917e-41
IAH1	14.3153	0.472775	9.17338e-46	8.14257e-44
NSMCE1	13.6697	0.470044	5.93134e-42	4.67085e-40
ACVR1	4.22805	0.469793	2.38608e-05	0.000151345
WBP1L	5.69561	0.468806	1.27802e-08	1.35067e-07
TRGV3	4.43067	0.467093	9.53606e-06	6.51985e-05
TM7SF2	4.82602	0.46693	1.42192e-06	1.11745e-05
CDK1	8.24148	0.466893	2.00996e-16	4.68361e-15
CMPK2	5.54837	0.466636	2.99074e-08	3.00758e-07
CCDC22	5.27066	0.466281	1.39975e-07	1.26812e-06
MAL	7.35724	0.465008	2.09807e-13	3.76378e-12
ASRGL1	6.68185	0.463354	2.53673e-11	3.66799e-10
ATP5MC1	15.9641	0.463265	3.28154e-56	4.27045e-54
SLC2A4RG	6.71407	0.46309	2.04438e-11	2.98701e-10
AC090204.1	5.10405	0.462434	3.40914e-07	2.92953e-06
DDT	13.3282	0.461849	5.5351e-40	4.12606e-38
PHLDA3	3.67966	0.45992	0.000235217	0.00121167
TCIRG1	6.96247	0.459647	3.65409e-12	5.76693e-11
TNFSF10	12.7972	0.458452	5.00768e-37	3.51132e-35
FHL3	7.79514	0.458451	7.35695e-15	1.51846e-13
EPHB6	3.87663	0.457305	0.000106896	0.000596689
CCNE1	3.39099	0.457091	0.00070019	0.0031811
TRAPPC6A	12.565	0.456526	8.67202e-36	5.89237e-34
HYAL3	3.29502	0.456081	0.000988759	0.0043049
HEBP1	7.64734	0.454645	2.33377e-14	4.56527e-13
GGCT	11.4088	0.453917	7.18433e-30	3.76528e-28
BRK1	18.1673	0.453196	1.05566e-71	2.0783e-69
CDC6	6.66559	0.453159	2.83679e-11	4.08177e-10
HCFC1R1	10.8337	0.453146	4.05285e-27	1.83586e-25
TMEM141	9.35147	0.452812	1.15483e-20	3.71774e-19
CMC4	3.30903	0.452435	0.000940794	0.00411943
ACYP1	8.54067	0.451965	1.62226e-17	4.13126e-16
NEURL1	3.11738	0.45064	0.00183202	0.00737806
VMAC	4.58047	0.450586	4.71896e-06	3.40368e-05
POLE2	5.65978	0.449664	1.57599e-08	1.64744e-07
FANCG	6.43034	0.449292	1.35499e-10	1.81248e-09
GPR18	4.41025	0.448115	1.04785e-05	7.12298e-05
TRAV8-2	4.3377	0.448097	1.45898e-05	9.64033e-05
ARSK	3.5	0.447203	0.000468174	0.00224105
TNFSF12	8.67175	0.446833	5.27378e-18	1.38493e-16
BIK	3.43244	0.446786	0.000601533	0.00279236
AC133644.2	3.48282	0.446784	0.000499196	0.00237327
CLSPN	9.0709	0.446488	1.51571e-19	4.48462e-18
NUDT6	4.77747	0.445958	1.8109e-06	1.40021e-05
MZT2A	19.142	0.445613	4.13882e-79	9.7778e-77
TNIP3	6.92469	0.445389	4.74704e-12	7.37809e-11
HELLS	9.50235	0.445184	2.76184e-21	9.21444e-20
OLIG3	3.21922	0.445152	0.0012912	0.00545464
PLEKHF1	8.20481	0.444813	2.74337e-16	6.35402e-15
VSIG10	4.1556	0.444331	3.28207e-05	0.000202002
CD109	9.36475	0.44432	1.02051e-20	3.29913e-19
C11orf80	3.90854	0.443855	9.37127e-05	0.000529647
ITPR2	6.99356	0.44342	2.93334e-12	4.68723e-11
OCIAD2	18.0334	0.442467	8.14049e-71	1.54328e-68
ANXA1	5.44246	0.441406	5.43063e-08	5.28136e-07
RBFA	6.71953	0.440794	1.96547e-11	2.88269e-10
AOAH	3.57834	0.440703	0.000348139	0.00172119
LINC02802	4.95191	0.439345	7.51995e-07	6.16861e-06
ASB16-AS1	5.19327	0.438768	2.12656e-07	1.87891e-06
PCLAF	10.3936	0.438151	4.03069e-25	1.63744e-23
C9orf16	18.0735	0.43781	4.74274e-71	9.10369e-69
DNPH1	17.4654	0.437632	1.29112e-66	2.06525e-64
FUT8	5.65065	0.436772	1.66258e-08	1.72972e-07
LINC01215	7.10548	0.436693	1.32e-12	2.18662e-11
A1BG	6.32658	0.436237	2.66099e-10	3.47763e-09
TIMM8B	12.1501	0.436175	1.32633e-33	8.14685e-32
HPCAL1	6.81629	0.436113	1.01393e-11	1.537e-10
AC020915.2	3.5368	0.435568	0.00040762	0.00197583
TMEM109	9.67685	0.434202	5.30221e-22	1.81338e-20
CDT1	9.21974	0.432021	3.88064e-20	1.21863e-18
TRAV4	3.24514	0.431923	0.00117917	0.00503402
SMIM3	5.70129	0.431354	1.23654e-08	1.31044e-07
WDHD1	5.82398	0.431282	6.00299e-09	6.64135e-08
IDH2	12.1067	0.431258	2.19904e-33	1.34002e-31
HPRT1	12.5562	0.431165	9.59129e-36	6.48827e-34
PNKD	10.9644	0.431022	9.92699e-28	4.59153e-26
SYTL1	5.27364	0.431015	1.37825e-07	1.24937e-06
ZNF528	3.08397	0.427651	0.00205064	0.00817063
SMKR1	4.07759	0.426568	4.59999e-05	0.000276359
TYMSOS	4.89937	0.426457	9.83099e-07	7.93716e-06
ZFP36L2	11.0481	0.426046	4.08262e-28	1.95304e-26
SH3BGRL3	22.5039	0.425521	2.22446e-107	9.75967e-105
ZBED2	8.18872	0.425252	3.11601e-16	7.1846e-15
KLHL23	3.41236	0.42512	0.000647579	0.00297553
INAFM1	3.35517	0.425041	0.000797367	0.00356875
AKR7A2	10.5446	0.424777	8.59526e-26	3.67657e-24
RMI2	9.00468	0.424682	2.76376e-19	8.06093e-18
MFSD3	3.26137	0.42395	0.00111403	0.00478922
TMEM99	7.30415	0.423822	3.10569e-13	5.47542e-12
SLC15A4	3.65498	0.423647	0.000259063	0.00131902
MAGEH1	6.43035	0.423569	1.35791e-10	1.8148e-09
TNK2-AS1	3.85024	0.422018	0.00011904	0.000658259
DUSP23	8.44892	0.42196	3.55295e-17	8.82834e-16
RAB34	3.91596	0.42107	9.09017e-05	0.000515468
TK1	9.29653	0.421022	1.89002e-20	6.0591e-19
LAPTM4B	6.04709	0.41964	1.55109e-09	1.85358e-08
UBE2E2	5.97876	0.419138	2.36141e-09	2.74503e-08
SLC25A12	4.50818	0.418408	6.64361e-06	4.66694e-05
C1orf35	8.4437	0.418017	3.72837e-17	9.23433e-16
H3F3A	17.8332	0.418013	3.61991e-69	6.46364e-67
AP4M1	4.0789	0.416097	4.57566e-05	0.000275329
RFC2	8.59594	0.415199	1.01214e-17	2.61656e-16
TSTD1	13.7203	0.414762	3.39509e-42	2.71537e-40
MIATNB	3.64934	0.414633	0.000264808	0.00134337
SLC2A11	3.89926	0.414248	9.73944e-05	0.000548236
AC018521.5	6.51132	0.414172	7.97217e-11	1.0904e-09
CXCR3	8.51607	0.41399	2.0171e-17	5.0695e-16
SIRT3	4.42304	0.411782	9.88091e-06	6.74062e-05
LIF	4.45093	0.411751	8.67617e-06	5.97182e-05
DNAJC12	6.87116	0.41157	6.90278e-12	1.06212e-10
ROGDI	4.99718	0.41142	5.95741e-07	4.95837e-06
RPP25	4.78933	0.411378	1.7073e-06	1.3288e-05
SLC29A3	3.56546	0.411347	0.00036562	0.00179836
MPST	8.08948	0.410833	7.02538e-16	1.58417e-14
FBXO34	6.61275	0.410812	4.06305e-11	5.74513e-10
PDCD1	3.8611	0.410705	0.000113904	0.00063259
DLEU1	4.9112	0.410673	9.25859e-07	7.51056e-06
EDRF1-DT	3.06267	0.410511	0.00220188	0.00868758
POLD3	7.3775	0.410382	1.80127e-13	3.26954e-12
YBEY	6.16128	0.410261	7.62131e-10	9.39269e-09
DYNC2LI1	3.43775	0.410199	0.000589958	0.00274527
TMEM256	12.1659	0.410014	1.12054e-33	6.91047e-32
TUBB6	4.74607	0.409712	2.11475e-06	1.61723e-05
RIBC2	3.62904	0.409326	0.000286469	0.00144372
ZKSCAN4	3.37289	0.408692	0.000747806	0.00337447
RBKS	3.23769	0.408559	0.00121053	0.0051564
AC009061.2	3.85239	0.40836	0.000118007	0.000652777
CHAC2	7.2632	0.408189	4.19483e-13	7.31167e-12
VANGL1	3.96971	0.407762	7.26743e-05	0.000420968
AC090825.1	3.79945	0.407195	0.000146234	0.000790974
OPN3	3.78691	0.406899	0.000153806	0.000827557
PCNA	9.87939	0.406438	7.3552e-23	2.68281e-21
TM7SF3	6.84647	0.404626	8.23552e-12	1.25461e-10
HMGN5	3.78172	0.404248	0.000157072	0.000842768
HEATR5A	3.35022	0.404214	0.000811704	0.00361815
AP2S1	12.7007	0.403946	1.6634e-36	1.1506e-34
RAD51	6.38066	0.403484	1.87482e-10	2.4776e-09
TEDC2	4.15192	0.403142	3.33561e-05	0.000204722
GAMT	7.61645	0.403119	2.95668e-14	5.70386e-13
FBXL8	4.01958	0.402992	5.89224e-05	0.000346672
ATP2A1-AS1	4.81265	0.40278	1.52043e-06	1.1906e-05
ITPRIP	4.3551	0.402025	1.3497e-05	8.98006e-05
PHGDH	5.17631	0.40159	2.32626e-07	2.03777e-06
ZNF34	3.51518	0.401154	0.000442315	0.00212788
BPHL	4.46183	0.400782	8.25029e-06	5.70169e-05
TIMM8A	5.73379	0.400658	1.023e-08	1.09472e-07
GATD3B	8.63288	0.400462	7.36311e-18	1.9164e-16
RNASEH2C	11.1439	0.400244	1.38952e-28	6.81707e-27
SNHG29	23.4085	0.399992	1.87495e-115	1.25182e-112
PARVB	7.12664	0.399659	1.13143e-12	1.88236e-11
ETHE1	11.9987	0.399021	8.21182e-33	4.92581e-31
NHP2	14.7148	0.398419	3.6113e-48	3.46594e-46
CENPM	8.9727	0.396896	3.64531e-19	1.04631e-17
CDK5	6.21299	0.396547	5.49641e-10	6.9013e-09
GPR174	5.42802	0.396436	5.89803e-08	5.70341e-07
CBX5	9.95661	0.396317	3.42584e-23	1.2831e-21
ASF1B	8.37722	0.396298	6.47421e-17	1.56811e-15
LPXN	13.6448	0.396139	9.47575e-42	7.42396e-40
RFC4	8.13306	0.395432	4.91766e-16	1.11875e-14
OSBPL8	9.60457	0.395347	1.06577e-21	3.59691e-20
ZNF575	3.42778	0.395229	0.000612045	0.00283431
RGS16	7.87458	0.395116	3.93184e-15	8.27088e-14
XPNPEP1	3.80925	0.394614	0.000140583	0.000763093
CD2	14.1564	0.393983	8.84425e-45	7.58728e-43
PPCDC	6.29436	0.393038	3.27585e-10	4.23434e-09
MYL6	23.2113	0.392838	4.3517e-113	2.22749e-110
SNHG8	12.3694	0.392722	9.75034e-35	6.34433e-33
GALNT1	3.81435	0.392291	0.000137711	0.000750039
RNF130	4.32189	0.392074	1.56842e-05	0.000103147
NBDY	10.5296	0.391981	1.04375e-25	4.42756e-24
GTPBP8	6.59185	0.39187	4.67223e-11	6.5582e-10
TMEM106C	8.67109	0.391203	5.27602e-18	1.38493e-16
HEMK1	5.83201	0.390895	5.72217e-09	6.34896e-08
MEMO1	6.75927	0.390626	1.50049e-11	2.22624e-10
FANCB	4.74842	0.390459	2.09161e-06	1.60114e-05
SESN1	3.28337	0.390449	0.00103094	0.00446955
LINC02273	3.10105	0.389857	0.00193656	0.00775228
SHISAL2A	3.55616	0.389169	0.000378907	0.0018521
IL12RB1	4.35183	0.388301	1.3692e-05	9.10195e-05
TRNAU1AP	8.55217	0.387953	1.47823e-17	3.77071e-16
MGMT	10.1782	0.387943	3.7518e-24	1.46971e-22
CHD7	6.70243	0.387773	2.2184e-11	3.23205e-10
NUDT7	3.85342	0.38742	0.000117523	0.000650334
AP002748.4	3.41731	0.387329	0.000636101	0.0029298
CDCA5	6.66298	0.385895	2.88427e-11	4.13546e-10
MEAF6	9.80489	0.385846	1.53767e-22	5.44065e-21
LINC01934	4.43309	0.385637	9.43718e-06	6.45799e-05
RHOC	9.85415	0.385435	9.48946e-23	3.42066e-21
JAML	7.07447	0.385351	1.64804e-12	2.7183e-11
SNRNP25	8.5137	0.385143	2.04868e-17	5.14046e-16
LPCAT4	5.51181	0.384929	3.68138e-08	3.64248e-07
SDHAF3	6.76778	0.384881	1.41814e-11	2.11017e-10
FOS	3.64048	0.384489	0.000273973	0.00138392
AC022075.1	3.57292	0.384464	0.000355307	0.00175268
RPS24	27.4973	0.384303	3.86504e-157	9.89193e-154
ATAD2	7.83405	0.384084	5.43219e-15	1.13492e-13
HSD17B8	6.30516	0.382278	3.0607e-10	3.96802e-09
UQCC2	11.4595	0.382245	4.15057e-30	2.21306e-28
LAGE3	11.7948	0.381865	8.95564e-32	5.17003e-30
BBC3	3.70677	0.381783	0.000211595	0.00109883
PHF6	6.52796	0.381735	7.14764e-11	9.81745e-10
CCDC28B	5.35655	0.381418	8.75491e-08	8.21763e-07
AL359232.1	3.09928	0.381086	0.00194762	0.00779251
SLC25A5	15.1178	0.381002	1.2594e-50	1.39132e-48
CHAF1B	5.01913	0.380946	5.3205e-07	4.46457e-06
PHLDA1	9.53977	0.380937	1.95452e-21	6.53891e-20
AL135818.1	6.00785	0.380757	1.97477e-09	2.32908e-08
LINC02256	3.30672	0.380637	0.000949205	0.0041527
SCCPDH	8.20374	0.380462	2.768e-16	6.40141e-15
DHDDS	4.40365	0.380415	1.08047e-05	7.3285e-05
RNF144A	5.85517	0.38001	4.99851e-09	5.5864e-08
ANXA11	14.003	0.379903	7.90383e-44	6.63231e-42
SMCO4	5.57291	0.378532	2.60039e-08	2.63575e-07
UBAP2	5.73578	0.378186	1.01115e-08	1.08279e-07
RFC3	5.41272	0.37818	6.42058e-08	6.17373e-07
MCM7	9.19818	0.377755	4.79017e-20	1.49204e-18
RAD51AP1	6.17331	0.3769	7.061e-10	8.74425e-09
FAM177A1	9.7543	0.376612	2.51273e-22	8.80947e-21
LINC01550	5.17121	0.37646	2.39102e-07	2.08972e-06
TOMM5	12.7378	0.376218	1.0933e-36	7.59669e-35
DHFR	8.72997	0.376063	3.1521e-18	8.46219e-17
SLC16A7	4.17789	0.375126	2.97938e-05	0.000185604
TCF19	6.19532	0.374892	6.16144e-10	7.69854e-09
PITPNA-AS1	6.77322	0.37488	1.36626e-11	2.03495e-10
TRAV13-1	3.3361	0.374838	0.00085374	0.00377702
TPI1	17.1611	0.374604	3.789e-64	5.76078e-62
PIGC	7.49534	0.374551	7.48581e-14	1.39675e-12
TRIAP1	7.27146	0.374332	3.9576e-13	6.91387e-12
CDKN2B	4.41796	0.372939	1.01113e-05	6.89472e-05
PCCB	5.75743	0.372937	8.90335e-09	9.58764e-08
TRAPPC2B	4.47231	0.372389	7.86072e-06	5.45702e-05
SPNS1	4.61046	0.372334	4.09109e-06	2.97034e-05
DUT	10.9473	0.371609	1.19287e-27	5.50081e-26
IFITM2	10.6626	0.371145	2.55557e-26	1.12768e-24
CHEK1	6.98205	0.371069	3.18103e-12	5.06721e-11
COQ3	3.94653	0.370898	8.00638e-05	0.000459096
CD82	9.12101	0.37063	9.70058e-20	2.90941e-18
LPGAT1	4.37195	0.37055	1.24949e-05	8.37868e-05
SCRN2	4.65862	0.37041	3.24347e-06	2.39801e-05
CSGALNACT1	6.73186	0.37039	1.81342e-11	2.67502e-10
MGAT4A	5.65185	0.370369	1.65371e-08	1.72282e-07
NFKBIL1	5.43051	0.369569	5.81614e-08	5.63131e-07
RTL10	3.18608	0.369303	0.00144858	0.00601687
PHPT1	12.2557	0.368707	3.94038e-34	2.45969e-32
CYTOR	10.448	0.368673	2.38324e-25	9.89108e-24
NIPSNAP3A	4.02034	0.367864	5.87376e-05	0.000345716
FO393401.1	4.61459	0.367733	4.00867e-06	2.91326e-05
DERA	5.74673	0.367664	9.49146e-09	1.01852e-07
KLF9	4.61828	0.367105	3.94043e-06	2.86774e-05
SPC25	6.09758	0.366713	1.13293e-09	1.37855e-08
TRAPPC13	3.21724	0.366665	0.00130016	0.00548197
CDK4	9.20032	0.366351	4.71185e-20	1.47063e-18
AC243960.1	5.63393	0.366165	1.83409e-08	1.89786e-07
EPHX2	4.45766	0.366133	8.41778e-06	5.80959e-05
RHEB	7.91365	0.366021	2.90364e-15	6.20143e-14
SCLY	4.91289	0.365618	9.18212e-07	7.4564e-06
TGIF1	6.3632	0.365292	2.10604e-10	2.7665e-09
ANXA5	12.3613	0.365292	1.09973e-34	7.09557e-33
ACOT7	9.47103	0.36509	3.77105e-21	1.25072e-19
AKIP1	7.82306	0.364815	5.96094e-15	1.23865e-13
HIST1H4D	4.86454	0.364742	1.17353e-06	9.3663e-06
PMEPA1	3.68137	0.36468	0.000233804	0.0012052
TMEM267	3.60915	0.36466	0.000309388	0.00154252
FAM102A	4.21103	0.364505	2.575e-05	0.000162184
HIBADH	5.32785	0.363697	1.02527e-07	9.50154e-07
ABRACL	13.3388	0.36353	5.35368e-40	4.02996e-38
BCKDHA	7.15113	0.363459	9.50745e-13	1.59038e-11
UNG	6.44272	0.363257	1.25216e-10	1.68226e-09
RASSF7	4.88406	0.36277	1.06296e-06	8.53261e-06
ZFAND2B	5.47831	0.362098	4.44612e-08	4.35981e-07
VKORC1	8.7227	0.361807	3.41562e-18	9.12179e-17
ZNF726	3.37355	0.361735	0.000746302	0.00336867
CCDC167	9.92397	0.361521	4.82988e-23	1.79149e-21
MAP3K13	5.80041	0.360582	6.90775e-09	7.57141e-08
PUSL1	4.26779	0.360158	2.00106e-05	0.000128948
KLHL22	5.55474	0.36011	2.88699e-08	2.90897e-07
PFKFB3	5.52993	0.359045	3.32431e-08	3.31913e-07
C8orf88	3.45312	0.358815	0.000557452	0.00260824
PYCR3	3.4686	0.358049	0.000526346	0.00248541
CSRNP1	7.45389	0.357995	1.01877e-13	1.88485e-12
AC021028.1	3.95886	0.356895	7.60784e-05	0.000438865
TAX1BP3	7.10954	0.356545	1.28335e-12	2.13049e-11
KDM6B	4.7107	0.355946	2.51489e-06	1.89307e-05
POLR3K	8.99921	0.35589	2.93492e-19	8.48751e-18
IL2RB	8.44355	0.355821	3.75662e-17	9.28932e-16
AL138724.1	4.23881	0.355555	2.27646e-05	0.000145111
COMMD7	8.53472	0.355272	1.72716e-17	4.3766e-16
RPS10	6.40836	0.354835	1.57021e-10	2.08582e-09
C19orf48	9.28391	0.354543	2.18238e-20	6.98178e-19
IDNK	3.86531	0.354527	0.000111963	0.000622934
TMEM175	3.75197	0.3544	0.000176941	0.000935642
C12orf57	16.4966	0.353183	1.06298e-59	1.48391e-57
TIGAR	6.27282	0.353103	3.76099e-10	4.80081e-09
RCN2	6.44767	0.352744	1.21557e-10	1.63883e-09
BOP1	5.3882	0.352452	7.35164e-08	6.99454e-07
SDCBP	6.21215	0.35243	5.53132e-10	6.93946e-09
NR4A3	5.13095	0.35237	2.95736e-07	2.54988e-06
WDR45	6.35801	0.352186	2.17711e-10	2.85741e-09
ZNF789	4.15771	0.351601	3.25425e-05	0.00020037
GMEB1	4.70541	0.351528	2.58404e-06	1.93942e-05
SNHG19	3.82774	0.351464	0.000130455	0.000713667
CENPK	8.34578	0.351305	8.5086e-17	2.03835e-15
EXOSC5	7.85882	0.351256	4.49022e-15	9.40679e-14
PGLS	11.3469	0.351155	1.51943e-29	7.856e-28
FN3KRP	6.78668	0.351128	1.24652e-11	1.86747e-10
ATPAF1	6.46286	0.350908	1.09869e-10	1.48386e-09
TRAV13-2	3.06775	0.350891	0.00216479	0.00855665
CTSD	8.51901	0.350693	1.97741e-17	4.98397e-16
TMEM254	4.12653	0.350684	3.72594e-05	0.000226776
PLAGL1	3.15561	0.350297	0.00160859	0.0066082
ETFB	11.4948	0.349993	2.85397e-30	1.54315e-28
MMD	6.03684	0.349777	1.65479e-09	1.97137e-08
SLC27A5	4.61735	0.349612	3.95853e-06	2.87955e-05
HINT2	10.2445	0.349516	1.93506e-24	7.69815e-23
SLAMF1	7.98719	0.349494	1.61767e-15	3.5386e-14
APBB1IP	7.51832	0.349471	6.30078e-14	1.1901e-12
GAPDH	21.0078	0.349286	5.35758e-93	1.71398e-90
SPSB3	7.41937	0.349137	1.32785e-13	2.42744e-12
SVIP	8.53416	0.348518	1.74217e-17	4.40738e-16
MZT2B	12.7788	0.348262	6.83748e-37	4.77256e-35
L3MBTL2	3.49824	0.3479	0.000471311	0.00225466
LIME1	7.47991	0.347751	8.42988e-14	1.56718e-12
TRMT1	5.40049	0.347584	6.8716e-08	6.55406e-07
LAX1	4.90926	0.347486	9.35665e-07	7.58209e-06
UQCRH	16.7355	0.347107	2.79289e-61	4.04601e-59
AC105446.1	4.16077	0.347045	3.20999e-05	0.000198121
DDIT4	9.23848	0.346866	3.33027e-20	1.05009e-18
NIT1	6.08105	0.346586	1.25897e-09	1.51987e-08
REX1BD	9.86413	0.346486	8.74519e-23	3.15979e-21
OGG1	4.39744	0.346055	1.11209e-05	7.53629e-05
RTN3	6.69802	0.345846	2.28586e-11	3.32717e-10
HMOX2	6.93907	0.345818	4.31631e-12	6.7359e-11
NXPE3	3.31944	0.345706	0.000906641	0.00398351
SIVA1	11.0337	0.345376	4.66266e-28	2.20987e-26
TIMM13	8.98787	0.345263	3.24722e-19	9.35542e-18
FAAP20	10.618	0.344901	4.10755e-26	1.79192e-24
FAIM	3.9675	0.344702	7.33575e-05	0.000424285
SOCS2-AS1	3.02309	0.344296	0.00251121	0.00976255
MCM4	6.53448	0.344011	6.85324e-11	9.44689e-10
SERF2	26.031	0.34369	2.30949e-140	2.72804e-137
PTPRK	4.69695	0.343672	2.6929e-06	2.0162e-05
RALA	8.99519	0.343628	3.07212e-19	8.86756e-18
RNH1	7.56201	0.34351	4.5039e-14	8.57025e-13
UBIAD1	5.76608	0.343176	8.47646e-09	9.16007e-08
MCM3	8.08112	0.342799	7.57956e-16	1.70662e-14
ATXN10	4.53299	0.342384	5.91556e-06	4.19775e-05
POLR2L	15.4232	0.342285	1.54989e-52	1.76297e-50
EGR2	5.9971	0.341773	2.10682e-09	2.47153e-08
RUSC1	3.93113	0.341447	8.53809e-05	0.000487764
ENDOD1	3.22419	0.341095	0.00126949	0.00537198
PLAC8	3.90614	0.340886	9.47371e-05	0.00053465
PLPP5	5.94684	0.340748	2.87197e-09	3.29611e-08
NDUFAF8	9.87391	0.34061	7.83162e-23	2.84308e-21
RPA1	6.10047	0.339714	1.11592e-09	1.35892e-08
BAG1	7.07403	0.339426	1.65966e-12	2.73452e-11
SDR39U1	6.19468	0.339328	6.19204e-10	7.73048e-09
RNASEH1-AS1	4.57939	0.339275	4.7468e-06	3.42215e-05
AGPAT2	5.05463	0.339173	4.42401e-07	3.75427e-06
CD47	9.00635	0.33831	2.76642e-19	8.06093e-18
ABCB8	3.87613	0.338279	0.000107136	0.000597597
DDB2	9.93839	0.338141	4.19991e-23	1.56538e-21
ERI3	6.65244	0.337557	3.11353e-11	4.44343e-10
TRAT1	6.37307	0.337539	1.98398e-10	2.6151e-09
DONSON	4.14563	0.337529	3.42958e-05	0.00021007
SRM	7.51562	0.337453	6.36582e-14	1.19943e-12
UQCRQ	14.337	0.337307	9.31227e-46	8.21835e-44
OSGEP	6.6026	0.337036	4.347e-11	6.1297e-10
CAT	6.74065	0.336932	1.70676e-11	2.52253e-10
LSM6	10.0812	0.336873	1.01753e-23	3.92594e-22
RABIF	6.56625	0.336702	5.55641e-11	7.74267e-10
FDX1	9.08837	0.336697	1.31336e-19	3.9161e-18
WDR41	3.74418	0.336565	0.000182469	0.000960245
ACY1	5.36864	0.336221	8.19168e-08	7.70781e-07
MECR	4.06954	0.336162	4.76247e-05	0.000285674
CMTM3	8.8164	0.336094	1.50457e-18	4.13312e-17
RNASET2	5.96101	0.336068	2.63569e-09	3.04313e-08
GEMIN2	3.32744	0.334939	0.000881135	0.0038781
EIF3L	14.2105	0.334315	4.99569e-45	4.33411e-43
GLMP	4.82884	0.333783	1.404e-06	1.10507e-05
WDR83	4.49818	0.333642	6.9673e-06	4.87648e-05
PXN-AS1	3.42107	0.333526	0.00062742	0.00289851
HDGFL3	3.97072	0.333379	7.23851e-05	0.000419609
BLVRB	5.49976	0.333315	3.94191e-08	3.88524e-07
MICOS13	10.9863	0.333224	8.02255e-28	3.74451e-26
TESC	5.92746	0.332891	3.22219e-09	3.67881e-08
LRR1	7.3407	0.33245	2.37397e-13	4.22418e-12
TMEM70	8.15084	0.332322	4.2891e-16	9.83035e-15
BBS7	3.82293	0.332236	0.000133042	0.000727043
RNF167	8.29022	0.332205	1.36165e-16	3.21684e-15
SSBP3	4.34232	0.332111	1.43009e-05	9.48206e-05
MBP	7.93455	0.332086	2.47814e-15	5.32974e-14
FDXR	4.56168	0.331864	5.16111e-06	3.68795e-05
PTAR1	5.34988	0.331726	9.09045e-08	8.51177e-07
CENPL	4.51839	0.331653	6.33501e-06	4.47061e-05
TRIP6	4.38627	0.331234	1.17041e-05	7.89323e-05
NAA10	10.1606	0.331135	4.57961e-24	1.78943e-22
URM1	9.09754	0.331133	1.22098e-19	3.64775e-18
RAD9A	4.05336	0.331085	5.10451e-05	0.000304407
FURIN	3.39834	0.330776	0.000681808	0.00311047
SLC25A11	7.77021	0.330352	9.03249e-15	1.84691e-13
SPATC1L	3.53686	0.330311	0.000407579	0.00197583
TYMS	8.05893	0.330128	9.00005e-16	2.00879e-14
NME2	15.5126	0.32898	4.07566e-53	4.77754e-51
ARL6IP6	7.23902	0.328701	5.02934e-13	8.69714e-12
ROMO1	12.945	0.328477	8.94115e-38	6.38606e-36
UBE2T	7.03853	0.328233	2.12869e-12	3.44812e-11
STX10	6.29088	0.328183	3.35767e-10	4.32916e-09
FAHD2A	5.19236	0.327919	2.1373e-07	1.88623e-06
PAXX	8.92177	0.327909	5.93241e-19	1.68078e-17
PIDD1	3.36844	0.327861	0.000760193	0.00342332
RANBP1	11.3251	0.327784	1.95394e-29	1.00015e-27
SERTAD1	5.98327	0.326374	2.29766e-09	2.67295e-08
ICOS	7.06182	0.325939	1.80867e-12	2.96098e-11
ATP5ME	12.323	0.325679	1.82821e-34	1.15057e-32
HSPB11	10.0376	0.325382	1.56512e-23	5.96378e-22
CENPX	7.82988	0.325368	5.65629e-15	1.17853e-13
NAA80	4.04627	0.324912	5.26285e-05	0.00031312
DMAC1	9.15791	0.324895	7.0253e-20	2.1444e-18
BCL7C	6.38094	0.324666	1.87663e-10	2.47786e-09
ICMT	5.22066	0.324527	1.83602e-07	1.63254e-06
DSN1	4.63078	0.32417	3.7099e-06	2.71411e-05
VAMP5	8.62698	0.324085	7.86254e-18	2.03948e-16
PLPP1	3.87422	0.323527	0.000107982	0.000601879
PLSCR3	7.95641	0.323491	2.07505e-15	4.49429e-14
PRKDC	9.15431	0.323481	7.20525e-20	2.19097e-18
ADSL	7.42073	0.322316	1.31212e-13	2.40154e-12
CHKB-DT	3.18791	0.321844	0.0014395	0.00598725
SMIM12	7.82649	0.321827	5.81654e-15	1.21028e-13
DENND6B	3.60964	0.321599	0.000308763	0.00154046
EIF2B3	4.94314	0.321112	7.87123e-07	6.43957e-06
RNASEH2A	6.81621	0.321071	1.01512e-11	1.5373e-10
SMIM19	7.67895	0.320905	1.84265e-14	3.63699e-13
CENPH	6.61995	0.320877	3.87024e-11	5.4826e-10
ZDHHC16	5.51706	0.320762	3.5732e-08	3.54229e-07
CLN6	5.10547	0.320041	3.3902e-07	2.91489e-06
POLR2J3	5.91244	0.320035	3.53685e-09	4.01418e-08
PSMG3	6.83637	0.319984	8.85706e-12	1.34662e-10
ALAS1	5.65148	0.319905	1.65576e-08	1.72379e-07
CUTA	10.8818	0.319857	2.54154e-27	1.1581e-25
AMDHD2	3.04608	0.319699	0.00232733	0.009119
C3orf14	5.00066	0.319612	5.85282e-07	4.87925e-06
HHLA3	4.0601	0.319568	4.96108e-05	0.00029666
LAT	11.3327	0.319459	1.79048e-29	9.19552e-28
HILPDA	3.90114	0.319174	9.66572e-05	0.000544686
TPGS1	5.80245	0.318455	6.83905e-09	7.50655e-08
CD55	6.53024	0.318421	7.06664e-11	9.72359e-10
SRP14-AS1	3.55367	0.317336	0.000382476	0.00186691
TMEM14A	7.88504	0.317325	3.65118e-15	7.71218e-14
OIP5	4.72747	0.317158	2.31859e-06	1.76105e-05
PRADC1	3.98132	0.316703	6.92385e-05	0.000402585
JMJD4	3.81823	0.316651	0.000135603	0.000739984
MPV17	7.07229	0.316513	1.68316e-12	2.7673e-11
ZSWIM7	4.88001	0.316435	1.08612e-06	8.70939e-06
MIR181A1HG	3.11877	0.316399	0.00182383	0.00734935
CCDC51	4.70495	0.316043	2.58905e-06	1.94128e-05
DENND1B	4.38587	0.316025	1.17291e-05	7.90656e-05
NDUFA4	17.8646	0.315616	3.21184e-69	5.80248e-67
GCSH	4.57017	0.315491	4.95851e-06	3.56308e-05
TMEM80	3.6843	0.315253	0.000231139	0.00119307
FEN1	6.64705	0.315134	3.22308e-11	4.59125e-10
BOLA3	9.38622	0.315058	8.48798e-21	2.76147e-19
THEM6	3.1279	0.314939	0.00176817	0.00715468
TCAF1	3.25515	0.314856	0.00113894	0.00488124
OTULINL	3.66519	0.314708	0.000249053	0.00127567
BEX4	5.58228	0.314215	2.46932e-08	2.51285e-07
EEF1AKMT1	4.50752	0.314018	6.66796e-06	4.67976e-05
FAM210B	3.05221	0.31394	0.00228057	0.00896122
ARPC5	11.542	0.313937	1.71343e-30	9.4306e-29
BABAM2	6.09452	0.313627	1.15927e-09	1.40948e-08
SMIM4	5.39172	0.313317	7.21714e-08	6.87082e-07
CD96	6.95464	0.313107	3.88262e-12	6.09626e-11
DHRS1	3.20524	0.312909	0.00135584	0.0056886
AHCY	7.66788	0.312668	1.99916e-14	3.93073e-13
ARHGAP19	3.90879	0.312222	9.36281e-05	0.000529364
LINC00963	4.07604	0.312093	4.63289e-05	0.000278118
AC010642.2	4.54979	0.31208	5.4615e-06	3.88812e-05
RAB30	3.32338	0.311877	0.000894085	0.0039306
CEP85L	4.2429	0.311358	2.23653e-05	0.000142803
IMPDH1	3.9541	0.311255	7.75789e-05	0.000446515
TNFSF4	3.25592	0.311066	0.00113597	0.00487262
NDUFB1	10.4777	0.311064	1.80941e-25	7.57094e-24
SAMD1	4.43678	0.310979	9.27373e-06	6.3518e-05
HM13	8.57012	0.31097	1.28256e-17	3.2825e-16
MGST3	7.49087	0.310956	7.77197e-14	1.44838e-12
PHB2	11.7027	0.310809	2.72024e-31	1.5414e-29
EIF2AK4	5.54402	0.310644	3.06948e-08	3.08071e-07
MTLN	8.68947	0.310212	4.57607e-18	1.21155e-16
DLEU2	4.75983	0.309972	1.97722e-06	1.51963e-05
TPST1	3.95484	0.309899	7.73504e-05	0.000445367
MYL6B	7.91271	0.309683	2.9453e-15	6.27296e-14
GLYCTK	3.24405	0.309509	0.00118419	0.00505405
RAD1	5.15724	0.30939	2.57795e-07	2.24289e-06
ATP5MF	14.7317	0.309292	3.75191e-48	3.57853e-46
NDUFA11	15.0202	0.309132	5.44624e-50	5.76776e-48
FBXO5	4.2046	0.309115	2.64852e-05	0.000166547
TSPAN5	4.51705	0.308584	6.37811e-06	4.49896e-05
MCM6	7.01886	0.30851	2.46174e-12	3.97502e-11
VPS25	6.96673	0.30832	3.55818e-12	5.63294e-11
GLMN	3.948	0.308243	7.95901e-05	0.000456892
SLC25A3	13.1368	0.308156	7.86979e-39	5.64713e-37
STAT4	5.37125	0.307945	8.08617e-08	7.6132e-07
CHEK2	3.33758	0.30791	0.000849592	0.00375975
C11orf1	6.22369	0.307613	5.15112e-10	6.48897e-09
C19orf53	12.4529	0.307547	3.78317e-35	2.51491e-33
RPA3	10.6373	0.307428	3.40135e-26	1.48807e-24
MKKS	5.42183	0.306982	6.10581e-08	5.89107e-07
MICOS10	12.4327	0.306939	4.96085e-35	3.28357e-33
MCUB	7.38425	0.3068	1.73232e-13	3.14811e-12
EEF1AKMT4	3.19585	0.306577	0.00140038	0.00584354
C5orf63	3.59997	0.306516	0.000320557	0.00159406
AGTRAP	3.26758	0.306411	0.00109013	0.0046983
CUEDC2	7.80245	0.306033	7.03808e-15	1.45656e-13
NCAPH2	4.47566	0.306006	7.7426e-06	5.38476e-05
MRPL11	9.24419	0.305808	3.18159e-20	1.00735e-18
TMA7	19.5453	0.305778	3.79142e-82	9.54444e-80
CTU2	3.07569	0.305674	0.00210834	0.00836582
RNF166	4.49988	0.305672	6.91703e-06	4.8435e-05
THOC7	8.35917	0.305311	7.67026e-17	1.84905e-15
CARHSP1	8.68656	0.305042	4.66945e-18	1.23415e-16
ZDHHC12	7.36065	0.304848	2.04989e-13	3.69461e-12
ABHD14B	7.49853	0.30462	7.32656e-14	1.36869e-12
ZNF428	7.4118	0.304331	1.40719e-13	2.56943e-12
CISD3	8.08069	0.303911	7.62027e-16	1.71328e-14
ATP6V0E2	6.86433	0.303459	7.30366e-12	1.11907e-10
NPM3	5.56691	0.303449	2.69172e-08	2.72293e-07
SNHG9	3.64203	0.302913	0.000272607	0.00137748
CSNK2B	12.5308	0.302638	1.53434e-35	1.03339e-33
RNF141	4.0354	0.302614	5.5112e-05	0.00032663
TMEM35B	6.55787	0.302562	5.87665e-11	8.15193e-10
MRM2	4.79633	0.302533	1.65115e-06	1.28706e-05
SEPTIN1	10.9495	0.302477	1.23313e-27	5.66945e-26
ARF5	11.118	0.302103	1.96988e-28	9.54982e-27
EI24	3.46417	0.302096	0.000535107	0.00251981
GON7	5.25414	0.3016	1.53353e-07	1.38279e-06
ATP5MC3	14.243	0.301474	3.36925e-45	2.95647e-43
COQ5	4.71627	0.301438	2.45067e-06	1.85108e-05
CDKN2D	4.22994	0.301275	2.36798e-05	0.000150321
TNFSF13B	4.27776	0.301063	1.91501e-05	0.000123871
UQCR11	14.4904	0.300934	1.03599e-46	9.41341e-45
C12orf45	6.17942	0.300568	6.81002e-10	8.44025e-09
RPS7	23.1567	0.300344	1.15151e-112	5.70405e-110
WDFY2	3.83875	0.299997	0.000124796	0.000685886
DPM3	6.62909	0.299642	3.6515e-11	5.1823e-10
ZNF880	4.47318	0.298896	7.8311e-06	5.44137e-05
SUCLG1	8.15032	0.298755	4.32822e-16	9.8905e-15
SNRPE	10.9716	0.298728	9.72967e-28	4.51386e-26
S100A10	11.0349	0.298617	4.90943e-28	2.31967e-26
RPL6	20.4273	0.298573	4.52897e-89	1.3122e-86
NDUFAF6	4.41678	0.298529	1.01739e-05	6.93127e-05
GADD45A	5.04761	0.298327	4.58931e-07	3.88334e-06
ERG28	6.29268	0.298128	3.32338e-10	4.28856e-09
DVL2	3.14453	0.298039	0.00167077	0.00681804
CPSF4	3.61074	0.297889	0.000307475	0.00153598
CTDSP1	3.20173	0.297879	0.00137232	0.00575304
LMF2	5.05472	0.297816	4.42513e-07	3.75427e-06
TMEM44-AS1	3.65786	0.297633	0.000256258	0.00130691
LAYN	5.04943	0.297528	4.54576e-07	3.85236e-06
CD9	3.10256	0.297323	0.0019265	0.00771607
GSTZ1	4.42716	0.297072	9.69504e-06	6.62264e-05
TOR3A	5.57322	0.296998	2.5974e-08	2.63575e-07
CDC45	4.71161	0.296629	2.5063e-06	1.88845e-05
BCAT2	4.63113	0.29637	3.70341e-06	2.71195e-05
MCM2	5.97648	0.296277	2.39699e-09	2.78217e-08
ARRDC1	4.9751	0.295876	6.68613e-07	5.52893e-06
CENPU	6.53997	0.295758	6.60408e-11	9.11161e-10
PPFIBP1	3.07695	0.295663	0.00209947	0.00833706
FKBP1A	12.3599	0.295648	1.2366e-34	7.91219e-33
GPX7	4.808	0.295566	1.5573e-06	1.21575e-05
STMP1	8.00233	0.295264	1.44042e-15	3.16438e-14
ZNF738	3.98554	0.295134	6.80373e-05	0.000396201
CLEC2B	3.52956	0.295117	0.000419173	0.00202926
TMEM223	5.03717	0.294921	4.85321e-07	4.09933e-06
CLTA	9.7991	0.294723	1.67308e-22	5.90617e-21
ELP6	5.51788	0.294198	3.56228e-08	3.53603e-07
NUDT1	8.57905	0.294012	1.18289e-17	3.04262e-16
ATP5F1D	12.6696	0.293955	2.79175e-36	1.92243e-34
LEPROTL1	7.54312	0.293911	5.27579e-14	1.00142e-12
DANCR	5.55304	0.293903	2.91789e-08	2.93817e-07
POP5	7.07595	0.293758	1.64086e-12	2.70935e-11
NUDT16	4.0204	0.293499	5.87236e-05	0.000345716
APRT	11.9207	0.293293	2.16903e-32	1.28106e-30
ZNF580	5.88887	0.293146	4.0782e-09	4.60139e-08
CD6	6.76783	0.29313	1.4253e-11	2.11877e-10
WDR18	5.96755	0.292866	2.53165e-09	2.92962e-08
MDP1	5.22836	0.292747	1.76192e-07	1.5712e-06
MEA1	8.75611	0.29237	2.55644e-18	6.91138e-17
MRPL15	7.04631	0.29209	2.02698e-12	3.29728e-11
ACTN1	6.18046	0.291013	6.77046e-10	8.40479e-09
FLYWCH2	5.05685	0.290941	4.37641e-07	3.7191e-06
RPL18A	32.3078	0.290782	3.13198e-208	4.80946e-204
MYCBP	7.44527	0.29078	1.09274e-13	2.01928e-12
ARPC1B	13.7419	0.290697	3.23776e-42	2.60309e-40
RNF115	6.02108	0.290657	1.82738e-09	2.17025e-08
CEP41	3.30995	0.290475	0.000937964	0.00411055
LYPLA1	7.20853	0.29025	6.29438e-13	1.07277e-11
SASS6	3.13424	0.289759	0.00173028	0.0070273
ETFRF1	3.72965	0.289595	0.000193345	0.00101228
NDUFA3	9.91491	0.289587	5.38232e-23	1.98204e-21
XRCC2	3.13137	0.289584	0.00174737	0.00708544
ADA	3.29784	0.289416	0.000979272	0.00427207
LINC00623	3.55611	0.289409	0.000379029	0.0018521
GPAA1	4.86259	0.289102	1.18511e-06	9.44891e-06
MRPS18A	6.80384	0.28908	1.10984e-11	1.67578e-10
FOSL2	3.46578	0.289034	0.000531876	0.00250844
HMGA1	8.39069	0.287919	5.91603e-17	1.43972e-15
SNX9	5.47203	0.28783	4.60703e-08	4.51471e-07
B3GAT3	6.10369	0.287415	1.09526e-09	1.3373e-08
NFU1	6.23949	0.286827	4.66651e-10	5.89786e-09
NTHL1	4.16316	0.28678	3.17735e-05	0.000196422
CZIB	5.88898	0.286699	4.0754e-09	4.60139e-08
PVT1	5.51651	0.286637	3.58719e-08	3.55387e-07
BLMH	4.17277	0.286527	3.04688e-05	0.000189271
IL16	4.8742	0.286501	1.11802e-06	8.95582e-06
ZC3H8	5.06178	0.285791	4.26771e-07	3.63679e-06
ID2	7.20227	0.285694	6.61681e-13	1.12274e-11
CNIH1	6.65645	0.285636	3.03651e-11	4.33755e-10
UCHL5	6.33225	0.285609	2.57554e-10	3.37457e-09
CIAPIN1	4.90151	0.285452	9.7366e-07	7.86923e-06
PTGES2	3.99443	0.284763	6.55372e-05	0.000382658
BRI3BP	3.72545	0.284726	0.000196546	0.00102834
SIPA1L1	3.32339	0.284712	0.00089397	0.0039306
NMI	6.09158	0.28462	1.18114e-09	1.43494e-08
CHRM3-AS2	3.57956	0.284525	0.000346702	0.00171464
LSM4	9.91835	0.284088	5.15068e-23	1.90129e-21
TXN2	8.1153	0.284084	5.77576e-16	1.30622e-14
CARD19	4.89017	0.283995	1.03148e-06	8.28851e-06
AL135905.2	6.03817	0.283989	1.6457e-09	1.96206e-08
STARD3	4.63891	0.283988	3.57027e-06	2.62321e-05
THYN1	7.67669	0.283818	1.88276e-14	3.70663e-13
GLRX2	5.24317	0.283338	1.62692e-07	1.45844e-06
IER2	8.12207	0.283308	5.36933e-16	1.21789e-14
COX7A2	14.7407	0.283166	3.49386e-48	3.37432e-46
MAPKAPK3	6.73016	0.283128	1.84124e-11	2.71085e-10
ATP6V1G1	8.85959	0.283106	1.04358e-18	2.88224e-17
SLC10A3	3.82018	0.282872	0.000134557	0.000734538
ACADM	5.9401	0.282617	2.99126e-09	3.42278e-08
CD247	9.71541	0.282184	3.78668e-22	1.3067e-20
NLE1	3.56871	0.28191	0.000361171	0.00177875
CTSB	6.60001	0.281724	4.43736e-11	6.23423e-10
MICAL2	4.24899	0.281425	2.17667e-05	0.000139155
HAUS4	6.16955	0.281413	7.25845e-10	8.96708e-09
DPP7	6.28872	0.280968	3.40752e-10	4.38975e-09
AL355001.2	3.02793	0.280476	0.00247157	0.00962309
IFI27L2	9.45147	0.280337	4.66773e-21	1.53815e-19
MRPL57	9.75163	0.280235	2.65177e-22	9.27578e-21
INIP	5.18478	0.279798	2.22775e-07	1.95706e-06
HAUS8	3.11125	0.279736	0.00187071	0.00751808
TMEM14B	9.24239	0.279605	3.26394e-20	1.0313e-18
FIS1	8.36525	0.279288	7.34226e-17	1.77276e-15
MVB12A	4.55225	0.279148	5.4026e-06	3.84797e-05
COPS3	6.80106	0.278918	1.13109e-11	1.70618e-10
MANBA	3.82373	0.278858	0.000132636	0.000725339
POLE4	6.87769	0.278746	6.65128e-12	1.02444e-10
TCEAL8	5.48403	0.278313	4.31431e-08	4.23597e-07
DUSP11	5.38187	0.278061	7.63232e-08	7.21686e-07
NUDT8	4.17159	0.277916	3.06237e-05	0.00019008
MMP24OS	5.62759	0.277888	1.90361e-08	1.9645e-07
RAD51C	5.90673	0.277705	3.66077e-09	4.14869e-08
FABP5	7.34572	0.277625	2.28889e-13	4.08226e-12
PTPN22	3.78083	0.277537	0.000157716	0.000845445
SLC25A39	7.30894	0.277533	3.02009e-13	5.33064e-12
MRPL24	6.58408	0.277379	4.93033e-11	6.90156e-10
LZIC	3.95964	0.277328	7.58471e-05	0.000437696
CHRAC1	6.01907	0.277326	1.84968e-09	2.19333e-08
CDCA4	4.46439	0.277122	8.1592e-06	5.6489e-05
C7orf50	6.08912	0.276953	1.20093e-09	1.45667e-08
PARD6A	3.16915	0.276888	0.00153557	0.00634558
GYG1	4.63589	0.276834	3.62243e-06	2.66026e-05
LINC00667	4.98938	0.276737	6.21385e-07	5.16062e-06
FAM24B	3.20101	0.27663	0.00137591	0.00576335
DCAKD	3.67482	0.276022	0.000239883	0.00123405
SPATA33	3.29561	0.275889	0.000987113	0.00430017
ZSCAN16-AS1	4.95999	0.275822	7.22905e-07	5.94226e-06
AARSD1	4.17139	0.27571	3.066e-05	0.000190228
TSPO	9.96292	0.275581	3.33384e-23	1.2517e-21
MTHFS	6.88165	0.275456	6.48839e-12	1.00136e-10
IMPDH2	9.57087	0.275381	1.50138e-21	5.04489e-20
AQP3	5.30957	0.275375	1.13603e-07	1.04504e-06
IFRD2	4.66762	0.27503	3.10573e-06	2.30617e-05
AL606807.1	5.67578	0.275013	1.43744e-08	1.5098e-07
ITM2B	7.69661	0.274886	1.62995e-14	3.25058e-13
MED20	3.13751	0.274754	0.00171113	0.00696056
SNRPD3	9.2836	0.274717	2.24338e-20	7.16203e-19
TNFAIP8L2	3.80463	0.274703	0.000143295	0.00077699
EIF1AY	7.50397	0.274654	7.05026e-14	1.3219e-12
CISD1	5.61552	0.274113	2.04061e-08	2.10306e-07
NDUFB2	12.192	0.27408	9.44531e-34	5.84847e-32
COX14	7.83441	0.273917	5.51213e-15	1.15006e-13
C1orf122	4.64872	0.273736	3.40551e-06	2.50935e-05
RTL8C	5.38158	0.273702	7.63789e-08	7.21768e-07
PPM1M	3.81097	0.273495	0.000139665	0.000758915
AL441992.1	4.11259	0.273381	3.95853e-05	0.000240076
NDUFB11	11.8908	0.273294	3.25401e-32	1.89995e-30
PRDX4	5.88788	0.273075	4.09911e-09	4.62158e-08
C5orf24	5.19195	0.272553	2.14363e-07	1.89073e-06
NR3C1	5.49511	0.271893	4.05443e-08	3.99101e-07
MRPL20	9.00386	0.271864	2.8674e-19	8.30787e-18
KIAA1586	4.72078	0.271818	2.39698e-06	1.81511e-05
UROD	5.89832	0.271713	3.85586e-09	4.36013e-08
HIGD2A	9.87855	0.271567	7.76247e-23	2.82466e-21
MAP4K3-DT	4.03757	0.271478	5.46056e-05	0.000324004
EIF3F	14.0736	0.271427	3.34341e-44	2.83654e-42
GALE	3.09105	0.27116	0.00200253	0.00798724
NME1	8.42211	0.270895	4.53741e-17	1.11304e-15
NDUFB3	10.5394	0.27041	9.7185e-26	4.134e-24
AGO2	3.71705	0.270071	0.000203235	0.00105972
RPL29	30.626	0.269898	1.99433e-190	1.53125e-186
LSM7	11.0506	0.269622	4.23873e-28	2.02143e-26
BLOC1S2	6.68386	0.269515	2.52503e-11	3.65452e-10
COX7A2L	9.14153	0.269301	8.3107e-20	2.51219e-18
COA5	5.78702	0.269061	7.50384e-09	8.17807e-08
ARL4C	7.37438	0.268912	1.86211e-13	3.36803e-12
UBL4A	4.06278	0.268877	4.90505e-05	0.000293483
ZNF35	3.03261	0.26877	0.00243365	0.00949227
SRGN	7.88173	0.268696	3.7963e-15	8.00769e-14
RGCC	6.27992	0.268588	3.61698e-10	4.62234e-09
LRRC42	3.07643	0.268491	0.00210324	0.00834988
PPP4C	8.23942	0.268378	2.09564e-16	4.87586e-15
HSBP1	7.59832	0.267613	3.43644e-14	6.58801e-13
SDCCAG8	4.08686	0.267572	4.42367e-05	0.000266601
SARNP	7.3418	0.267455	2.37096e-13	4.22371e-12
NBEAL1	5.33952	0.267384	9.63114e-08	8.96882e-07
CLDND1	8.00804	0.266652	1.37547e-15	3.03473e-14
UQCR10	11.9033	0.266194	2.90791e-32	1.71087e-30
RPIA	5.5855	0.26603	2.42564e-08	2.47004e-07
ERH	11.46	0.26584	4.5449e-30	2.39833e-28
GTF2I	6.39097	0.265829	1.76222e-10	2.33281e-09
MXD3	3.49099	0.265684	0.000484194	0.00231053
MIF	13.2438	0.265402	2.1448e-39	1.56093e-37
DNAJC9	6.40228	0.265027	1.63589e-10	2.1712e-09
MRPS21	10.429	0.264894	3.03121e-25	1.24126e-23
SMG6	3.45714	0.264714	0.000549328	0.00257651
PLP2	9.4831	0.26466	3.52444e-21	1.17146e-19
YPEL3	3.56351	0.264451	0.000368524	0.00180685
P2RX5	3.60279	0.264447	0.000316996	0.00157687
MRPS26	6.0016	0.264404	2.05885e-09	2.42081e-08
SLC25A6	14.9234	0.264339	2.65647e-49	2.68373e-47
CHCHD5	7.2255	0.264254	5.59373e-13	9.59746e-12
SPTSSA	4.13858	0.264189	3.53776e-05	0.000216265
LINC00467	3.22871	0.26404	0.00124938	0.00529695
ZMAT5	4.60644	0.263844	4.1738e-06	3.02325e-05
COA3	6.75251	0.263821	1.58197e-11	2.34259e-10
CSTB	10.2503	0.263688	1.90137e-24	7.58373e-23
APEX2	4.67827	0.263639	2.95107e-06	2.1977e-05
HSPB1	9.13243	0.263261	9.00533e-20	2.71149e-18
MIF4GD	5.75839	0.263168	8.87909e-09	9.56824e-08
SUMF2	6.46687	0.263114	1.0744e-10	1.45361e-09
MRPS34	8.28544	0.262943	1.42773e-16	3.36777e-15
QTRT1	4.6759	0.262703	2.98486e-06	2.22179e-05
RPS4Y1	11.4997	0.262573	3.05352e-30	1.64526e-28
CARD16	5.18643	0.262403	2.20911e-07	1.9429e-06
PLEKHJ1	6.79628	0.262325	1.17177e-11	1.76236e-10
DCTN2	7.65494	0.262291	2.22711e-14	4.36217e-13
ERGIC3	7.73233	0.26224	1.22306e-14	2.47448e-13
WDYHV1	3.26064	0.262184	0.00111703	0.00480077
DGCR6L	5.64175	0.262179	1.75417e-08	1.82006e-07
PPIL3	5.54693	0.262115	3.02089e-08	3.03592e-07
UBE2V2	6.01381	0.262036	1.91162e-09	2.25806e-08
PDXK	3.27771	0.262013	0.00105181	0.00454462
H2AFV	10.798	0.261879	6.53249e-27	2.94173e-25
PNPLA4	3.28438	0.261837	0.00102724	0.00445602
AP5S1	3.08177	0.261726	0.00206596	0.00821888
SPC24	3.70839	0.261591	0.000210225	0.00109249
SGF29	3.65942	0.261365	0.000254775	0.00129978
TEFM	3.73085	0.261271	0.000192448	0.00100792
DALRD3	3.74917	0.261069	0.000178915	0.000944781
BORCS8	4.27645	0.260873	1.92556e-05	0.0001245
SPAG16	3.52458	0.260869	0.000427004	0.00206197
NDUFA1	11.7234	0.260555	2.28241e-31	1.2981e-29
PEBP1	10.1146	0.259343	7.5977e-24	2.94622e-22
DIABLO	3.08318	0.259162	0.0020564	0.00818933
EEF1E1	6.41727	0.259011	1.486e-10	1.98082e-09
MMS22L	3.13949	0.25893	0.00169972	0.0069215
TMEM243	8.30954	0.258844	1.17016e-16	2.77727e-15
IL4R	5.42254	0.258825	6.08817e-08	5.87987e-07
GTF2H4	3.18837	0.258765	0.00143743	0.00598189
IER3IP1	6.44593	0.258683	1.23136e-10	1.65722e-09
SCOC	5.43853	0.258625	5.56565e-08	5.40241e-07
NDUFS8	9.09962	0.25846	1.21813e-19	3.64632e-18
PCIF1	3.78836	0.258087	0.000152996	0.000823774
PMPCA	3.28941	0.257616	0.00100912	0.0043861
MRPS24	7.69521	0.257556	1.63338e-14	3.25321e-13
NCAPD3	4.71133	0.257553	2.51086e-06	1.89096e-05
HCST	6.21556	0.257543	5.43809e-10	6.83925e-09
ZAP70	5.55049	0.25749	2.96197e-08	2.98061e-07
PEX11B	4.40664	0.257287	1.06671e-05	7.24474e-05
GAS5	11.9655	0.257217	1.35698e-32	8.04549e-31
PGK1	10.0813	0.257012	1.06075e-23	4.08242e-22
TPD52	3.25426	0.256914	0.00114271	0.00489469
VPS29	7.48079	0.256905	8.41174e-14	1.56571e-12
FERMT3	5.80518	0.256666	6.7325e-09	7.40575e-08
CMAS	4.58811	0.256626	4.55543e-06	3.29191e-05
MRPS16	7.36379	0.256528	2.01522e-13	3.63639e-12
RPS27L	9.78562	0.256339	1.90853e-22	6.72186e-21
TWF2	7.60667	0.256328	3.23136e-14	6.21037e-13
PSMG1	5.71048	0.256222	1.17618e-08	1.24993e-07
NEDD8	11.2611	0.256161	4.21161e-29	2.10663e-27
MRPS7	6.91177	0.256099	5.24867e-12	8.14127e-11
TM9SF1	3.32593	0.255906	0.000885882	0.00389788
PRMT7	3.09328	0.255859	0.00198743	0.00793733
HAUS1	5.73117	0.255445	1.04202e-08	1.11352e-07
ZWINT	5.65896	0.254481	1.58555e-08	1.6563e-07
CLPP	7.23742	0.25431	5.12687e-13	8.85581e-12
COQ4	5.59507	0.253881	2.29534e-08	2.34513e-07
COX5A	11.0006	0.253879	7.50731e-28	3.52545e-26
MSRB2	3.6185	0.253867	0.000298524	0.00149662
CDK10	3.29526	0.253495	0.00098846	0.00430482
FUNDC2	6.73073	0.253238	1.83633e-11	2.7062e-10
DPM2	5.78205	0.253218	7.71864e-09	8.38835e-08
SF3B5	9.44248	0.253048	5.11868e-21	1.67596e-19
TUFM	7.62256	0.252969	2.85512e-14	5.51487e-13
CYB5R3	6.28408	0.252681	3.51386e-10	4.5112e-09
GNG5	11.6006	0.252499	9.79309e-31	5.42898e-29
ACAP2	5.53005	0.252468	3.32898e-08	3.31947e-07
MRPS14	5.84102	0.252434	5.44476e-09	6.06307e-08
FRG1	5.99448	0.252271	2.15205e-09	2.51267e-08
REV1	3.46736	0.252213	0.000528919	0.00249603
ZNF32	3.71676	0.252001	0.00020349	0.00106069
NDUFB10	8.91093	0.251833	6.66103e-19	1.86655e-17
RPP25L	4.828	0.251737	1.41059e-06	1.10941e-05
SLC35F3	3.4989	0.251637	0.000470221	0.00225014
GTF2H5	7.04347	0.251279	2.07453e-12	3.36749e-11
CCL28	3.10232	0.251271	0.00192812	0.00772054
RAB27A	4.82306	0.250839	1.44609e-06	1.13471e-05
H2AFJ	6.15709	0.250757	7.85218e-10	9.65397e-09
PSMG2	7.43051	0.250656	1.23014e-13	2.25418e-12
ARMC6	3.04783	0.250505	0.00231392	0.009076
NDUFS3	6.99881	0.250376	2.85026e-12	4.57353e-11
SFT2D2	-3.25748	-0.250189	0.00113041	0.00485284
CLINT1	-4.96501	-0.251124	7.06019e-07	5.81945e-06
LINC01089	-3.23585	-0.251589	0.0012195	0.00518598
LIX1L	-3.65109	-0.251763	0.000263393	0.00133796
INTS14	-3.23368	-0.252045	0.0012288	0.00522121
TROAP	-3.56544	-0.252131	0.000365953	0.00179884
STAU1	-4.50672	-0.252173	6.70961e-06	4.70684e-05
FRMD4B	-4.90465	-0.252418	9.60102e-07	7.76782e-06
MMGT1	-3.19672	-0.252722	0.00139746	0.00583771
CHP1	-3.66055	-0.252829	0.00025382	0.0012962
HLA-A	-16.7919	-0.253537	7.88626e-62	1.16444e-59
AP3M1	-3.44601	-0.253594	0.000572861	0.002673
PPP3CC	-3.08575	-0.254275	0.00204004	0.00813052
WIPF1	-6.65271	-0.254305	3.13794e-11	4.47412e-10
EIF2AK1	-5.02259	-0.254334	5.24437e-07	4.40309e-06
KPNA3	-3.07037	-0.254523	0.00214747	0.00849912
STARD3NL	-3.35218	-0.254768	0.000806848	0.00360173
KLHL28	-3.4618	-0.254988	0.000540382	0.00253998
ADD3	-4.23104	-0.25526	2.36219e-05	0.00015014
USP47	-3.85801	-0.255869	0.000115519	0.000640864
TANK	-5.60432	-0.256165	2.18453e-08	2.23936e-07
EXOC7	-3.04953	-0.256281	0.00230193	0.00903128
TRIM38	-3.66445	-0.25634	0.00025006	0.00127955
STT3A	-3.8998	-0.256936	9.73478e-05	0.000548175
UHMK1	-3.96033	-0.25724	7.57152e-05	0.000437099
ARID5A	-7.28075	-0.257848	3.7802e-13	6.61148e-12
SURF4	-6.48591	-0.258191	9.51627e-11	1.28864e-09
MAP3K8	-3.69332	-0.258224	0.000223229	0.00115379
MSN	-6.00884	-0.258422	1.98164e-09	2.33539e-08
WDR48	-3.70068	-0.259016	0.000216984	0.00112416
HNRNPLL	-3.68392	-0.259157	0.000231669	0.0011946
HEXB	-3.4295	-0.259576	0.000608828	0.00282026
HAT1	-4.19742	-0.259971	2.74006e-05	0.00017153
CTNNB1	-3.06277	-0.260293	0.00220277	0.00868887
TOMM70	-3.83246	-0.260469	0.000128177	0.000702709
CENPA	-3.46495	-0.261379	0.000533854	0.00251468
EXOC5	-3.13525	-0.261438	0.00172559	0.00701196
AATF	-5.338	-0.261516	9.74937e-08	9.06791e-07
DNAAF2	-3.78839	-0.261569	0.000153131	0.000824215
BECN1	-4.29886	-0.261948	1.74393e-05	0.000113505
CYFIP2	-5.14814	-0.261975	2.71552e-07	2.35591e-06
PLIN3	-3.92658	-0.262625	8.71151e-05	0.000496747
SEC24C	-3.11937	-0.262636	0.00182109	0.00734172
WARS	-6.00541	-0.262785	2.01869e-09	2.37723e-08
CRLF3	-3.1546	-0.262853	0.00161557	0.00663116
AKIRIN1	-4.39362	-0.262904	1.13399e-05	7.66443e-05
CLTC	-4.15496	-0.263038	3.29977e-05	0.000202929
ZNF226	-3.23726	-0.263234	0.00121363	0.00516532
MT-ND2	-11.7223	-0.263257	2.11994e-31	1.21018e-29
GLRX	-5.52958	-0.263626	3.35002e-08	3.33612e-07
SEC23IP	-3.30351	-0.264086	0.000960471	0.00419601
NUFIP2	-3.4729	-0.264584	0.000518611	0.00245417
YKT6	-3.51892	-0.264591	0.000436606	0.00210503
NSUN2	-3.58751	-0.264712	0.000336547	0.00166872
CARS	-3.61752	-0.265225	0.000299902	0.00150107
MT-CO1	-18.6248	-0.265492	3.5475e-75	7.36154e-73
NLRC5	-3.61832	-0.265505	0.000299017	0.00149811
HSPH1	-5.50708	-0.265654	3.80351e-08	3.75364e-07
YWHAQ	-8.19026	-0.266038	3.16434e-16	7.2851e-15
GOLGB1	-5.16288	-0.266194	2.51047e-07	2.18914e-06
CDS2	-3.47196	-0.266448	0.000520426	0.002462
OTUD5	-3.10488	-0.266656	0.00191247	0.00766386
MSMO1	-3.12115	-0.266755	0.00180987	0.00730608
HLA-E	-9.60105	-0.267701	1.12995e-21	3.80515e-20
MAP4K1	-3.96201	-0.267871	7.51952e-05	0.00043426
RANBP2	-4.17465	-0.267975	3.02721e-05	0.000188278
VMP1	-5.82252	-0.268498	6.09382e-09	6.73213e-08
SPN	-5.17614	-0.268821	2.33888e-07	2.04765e-06
ACTR2	-7.78952	-0.269909	7.86961e-15	1.61775e-13
SPEN	-4.23084	-0.270794	2.36327e-05	0.000150147
FAM13B	-3.21764	-0.271063	0.00129958	0.00548103
PUM1	-3.62469	-0.271354	0.000291767	0.00146753
DNAJA1	-7.25304	-0.271611	4.6003e-13	7.99119e-12
AKAP11	-3.19566	-0.272183	0.00140238	0.0058503
PIK3C3	-3.54394	-0.273257	0.000397296	0.00193188
PIMREG	-3.21913	-0.273373	0.00129238	0.00545662
NOLC1	-6.06919	-0.27339	1.36585e-09	1.64373e-08
RCSD1	-6.08472	-0.273453	1.23859e-09	1.50075e-08
HIST1H1D	-6.2866	-0.273651	3.48396e-10	4.47697e-09
CWC22	-3.46657	-0.273837	0.000530941	0.0025048
DTX3L	-3.74973	-0.273846	0.000178755	0.000944259
SF1	-7.18901	-0.273852	7.33527e-13	1.23781e-11
HIST1H2AG	-4.6724	-0.274032	3.04413e-06	2.26371e-05
HNRNPH1	-6.00043	-0.274185	2.08518e-09	2.44802e-08
ZNF100	-3.09649	-0.274239	0.00196756	0.00786614
RAB1A	-3.87753	-0.275146	0.000106672	0.000595872
ZNF101	-5.60526	-0.275599	2.17562e-08	2.23172e-07
TAF15	-7.75501	-0.275729	1.03074e-14	2.09921e-13
BRD2	-6.57963	-0.27588	5.12287e-11	7.15803e-10
THAP3	-3.14926	-0.275938	0.0016451	0.0067348
HIST1H2BH	-3.66138	-0.276836	0.000253208	0.00129393
DCTN1	-4.2839	-0.277218	1.86518e-05	0.000120851
ZC3H7A	-5.00505	-0.277567	5.7458e-07	4.80046e-06
TARDBP	-3.85605	-0.277936	0.000116482	0.000645507
ZKSCAN1	-4.82281	-0.278002	1.45084e-06	1.13785e-05
ATG10	-3.21288	-0.278304	0.00132143	0.00555643
ITCH	-3.10591	-0.278997	0.00190602	0.00764001
LUC7L	-3.74479	-0.279312	0.000182243	0.000959965
EFHD2	-4.51462	-0.279816	6.46498e-06	4.54978e-05
MDFIC	-4.24309	-0.279832	2.23897e-05	0.00014284
LINC00342	-3.10462	-0.280066	0.00191428	0.00766909
KIF23	-3.19624	-0.280353	0.00139955	0.00584326
S1PR1	-7.10232	-0.281725	1.37395e-12	2.27353e-11
NCAPG2	-3.7887	-0.281858	0.000152947	0.000823774
DCAF7	-5.78467	-0.281889	7.63398e-09	8.30223e-08
PDIA4	-4.68208	-0.28208	2.90309e-06	2.16407e-05
ZHX1	-3.02316	-0.282101	0.00251234	0.0097645
PPRC1	-3.07471	-0.282213	0.0021166	0.00839208
DCAF16	-3.49374	-0.282485	0.000479816	0.00229106
CYTH2	-3.5482	-0.282606	0.000390895	0.0019046
DCAF13	-3.5171	-0.282816	0.000439523	0.00211644
ICE2	-4.46427	-0.283211	8.18544e-06	5.66451e-05
FAM98A	-3.64427	-0.283217	0.000270456	0.00136841
NBN	-3.91689	-0.283621	9.07276e-05	0.000514861
SELPLG	-4.0501	-0.283648	5.18668e-05	0.000308708
HNRNPUL1	-6.24861	-0.283706	4.43239e-10	5.60657e-09
SCLT1	-4.41598	-0.283781	1.02313e-05	6.96727e-05
SRRT	-5.51196	-0.283909	3.69762e-08	3.65619e-07
NFAT5	-3.9236	-0.284001	8.82216e-05	0.00050231
ZNF451	-3.64862	-0.284143	0.000265941	0.00134823
EXOC1	-3.41132	-0.284165	0.00065086	0.00298882
RCOR3	-3.15735	-0.284198	0.00160023	0.00657914
RNF10	-4.51547	-0.284313	6.44031e-06	4.53658e-05
PPP1R8	-3.62266	-0.284386	0.000294002	0.00147635
MKI67	-5.94146	-0.284542	2.97099e-09	3.40466e-08
NRBP1	-3.4183	-0.284582	0.000634442	0.0029248
VPS26A	-4.52271	-0.284604	6.22492e-06	4.39898e-05
GPATCH8	-4.48865	-0.284878	7.30309e-06	5.09524e-05
MT1F	-4.60712	-0.28537	4.16835e-06	3.02072e-05
UBE2Z	-4.17587	-0.285441	3.01081e-05	0.00018741
SCAF4	-3.74844	-0.285586	0.000179651	0.000948339
AP2B1	-5.52559	-0.285853	3.42273e-08	3.40191e-07
CPSF3	-4.69432	-0.285945	2.73514e-06	2.04582e-05
TRIM56	-4.45724	-0.286031	8.45378e-06	5.83182e-05
ZNF106	-5.35406	-0.286824	8.9238e-08	8.36593e-07
RACGAP1	-4.33999	-0.28726	1.44776e-05	9.58266e-05
CDC42SE1	-5.79069	-0.287406	7.37423e-09	8.04824e-08
BCLAF1	-7.09849	-0.287748	1.40988e-12	2.33048e-11
HLA-C	-15.9714	-0.28802	2.93146e-56	3.88065e-54
CHD1L	-3.66564	-0.288192	0.00024893	0.00127547
ZBTB25	-3.71956	-0.288626	0.00020144	0.00105143
ASXL1	-5.99834	-0.288954	2.1096e-09	2.4729e-08
KIF4A	-3.50044	-0.28915	0.000467857	0.00224023
MACF1	-5.63353	-0.290211	1.84781e-08	1.91077e-07
RNF149	-4.22483	-0.290232	2.4275e-05	0.000153845
ECI2	-4.34134	-0.290433	1.43951e-05	9.53214e-05
SLC35F2	-3.13162	-0.291005	0.00174667	0.00708449
RAB9A	-4.53375	-0.29143	5.90912e-06	4.19706e-05
NEDD9	-5.81289	-0.291509	6.44864e-09	7.09859e-08
GPR132	-3.76458	-0.291837	0.000168444	0.000895646
CD226	-3.17525	-0.29214	0.001505	0.00622596
BTAF1	-3.32964	-0.292189	0.000874962	0.00385646
TSG101	-5.95793	-0.29243	2.70017e-09	3.11056e-08
STAT6	-3.30905	-0.29282	0.000941751	0.00412244
PPP2R5D	-3.70433	-0.293045	0.000213861	0.00110985
ZNF441	-3.03298	-0.293191	0.00243245	0.00949017
HNRNPUL2	-5.13541	-0.293246	2.90526e-07	2.50777e-06
CBLL1	-5.0284	-0.293521	5.09409e-07	4.291e-06
PPT1	-5.80083	-0.293999	6.94027e-09	7.5962e-08
C17orf49	-10.5539	-0.294025	8.25479e-26	3.5408e-24
ZBTB21	-3.19051	-0.294052	0.00142753	0.00594552
CMTR2	-3.29913	-0.294884	0.000975683	0.00425884
STAM	-3.69601	-0.294957	0.000220978	0.00114331
SNRNP200	-5.00383	-0.295031	5.78443e-07	4.83011e-06
DEPDC1B	-3.54814	-0.295683	0.000390942	0.0019046
SH3BP1	-4.33717	-0.295798	1.46726e-05	9.6867e-05
PITPNB	-4.77856	-0.296126	1.80836e-06	1.39895e-05
ASTE1	-3.02672	-0.296142	0.00248311	0.00966313
TPT1	-21.1367	-0.29618	1.68527e-95	5.75091e-93
HERPUD2	-3.55979	-0.296441	0.000374203	0.00183235
TSPYL1	-3.97229	-0.296727	7.20525e-05	0.000417839
TTC32	-4.74661	-0.296795	2.1175e-06	1.61853e-05
MAST4	-4.96109	-0.296826	7.20629e-07	5.93032e-06
SELL	-5.29072	-0.296923	1.26439e-07	1.15297e-06
MGA	-3.81475	-0.297775	0.000137738	0.000750039
GNL3	-4.33691	-0.297784	1.46869e-05	9.692e-05
LEO1	-4.63158	-0.298101	3.70547e-06	2.71216e-05
PPP4R3A	-4.81105	-0.298319	1.53941e-06	1.20301e-05
NIN	-3.37127	-0.29869	0.000753203	0.00339525
NFATC2	-5.38268	-0.298869	7.62332e-08	7.21279e-07
MAPK6	-3.49822	-0.299021	0.000471798	0.00225628
AURKA	-3.80302	-0.29926	0.000144301	0.000781618
CENPF	-5.90261	-0.299381	3.75459e-09	4.25187e-08
POLR2M	-3.3804	-0.299472	0.000728664	0.0033007
C4orf46	-3.67314	-0.299615	0.000241723	0.00124185
DLGAP4	-3.13974	-0.30003	0.00169927	0.00692149
NBPF26	-4.28738	-0.300041	1.83638e-05	0.000119086
ALDH9A1	-3.40867	-0.300364	0.00065709	0.00301202
TRMT1L	-3.43717	-0.300419	0.000591876	0.00275253
TRPC4AP	-3.709	-0.30044	0.000210009	0.00109208
RCN1	-3.28259	-0.30067	0.00103451	0.00448122
P2RY8	-4.26678	-0.301355	2.01506e-05	0.000129796
AKAP17A	-3.40394	-0.30141	0.000668723	0.00305509
FUT7	-4.94145	-0.30143	7.95472e-07	6.5044e-06
VPS39	-3.57989	-0.301533	0.000346539	0.00171439
NUP188	-3.07254	-0.301676	0.00213202	0.00844666
COPG1	-4.61044	-0.302042	4.1031e-06	2.97765e-05
ECE1	-3.54919	-0.302072	0.000389468	0.00189923
HLA-B	-15.4439	-0.302171	8.52314e-53	9.91526e-51
DDX1	-3.17552	-0.302648	0.00150336	0.00622154
ATF3	-4.71842	-0.302781	2.42832e-06	1.83691e-05
SUGP2	-3.47555	-0.303031	0.000513616	0.00243279
CALCOCO2	-5.53335	-0.30327	3.2747e-08	3.27385e-07
MICU1	-3.55851	-0.303816	0.000375894	0.00183888
SRP72	-6.32776	-0.304084	2.67181e-10	3.4888e-09
AARS	-4.47421	-0.304642	7.81464e-06	5.43239e-05
KIF14	-3.6219	-0.304718	0.000294827	0.00147953
CASC3	-4.62532	-0.305019	3.8213e-06	2.785e-05
C9orf78	-7.06516	-0.305119	1.78696e-12	2.92855e-11
ZBTB44	-3.40777	-0.305219	0.000659434	0.00301931
MTMR6	-3.42092	-0.305377	0.00062841	0.00290134
FKBP5	-4.861	-0.305426	1.19815e-06	9.5232e-06
CIZ1	-3.68914	-0.305612	0.000227039	0.00117229
KIF5B	-5.42264	-0.305618	6.10744e-08	5.89107e-07
AP1AR	-3.35705	-0.30567	0.000792816	0.00355563
APOL3	-3.85942	-0.305742	0.000114914	0.00063797
FBXO28	-3.54792	-0.306132	0.000391358	0.00190603
SEPTIN9	-8.94793	-0.306199	4.81957e-19	1.37309e-17
BMI1	-3.632	-0.306378	0.000283657	0.00143049
SMG1	-4.84811	-0.306388	1.27895e-06	1.01183e-05
APLP2	-4.22293	-0.306606	2.44766e-05	0.000154931
TAP1	-7.62405	-0.308253	2.84243e-14	5.49727e-13
EIF4EBP2	-4.70846	-0.308656	2.55373e-06	1.91948e-05
BIN2	-5.25808	-0.308708	1.50775e-07	1.36034e-06
CFLAR	-8.49926	-0.309203	2.37289e-17	5.93454e-16
YPEL2	-4.89988	-0.30938	9.85281e-07	7.95059e-06
NUP98	-4.59304	-0.309385	4.46338e-06	3.22843e-05
SPTAN1	-5.7642	-0.309587	8.61659e-09	9.30495e-08
SAFB	-5.38879	-0.310024	7.36609e-08	7.00394e-07
MAML2	-4.60882	-0.31016	4.13904e-06	3.0009e-05
NOP2	-4.65099	-0.310479	3.37402e-06	2.48974e-05
OSBPL3	-3.2672	-0.310986	0.00109244	0.00470692
MON2	-3.06409	-0.311166	0.00219362	0.00865946
LRPPRC	-5.23352	-0.311708	1.72108e-07	1.53907e-06
ITSN2	-5.41075	-0.311875	6.52712e-08	6.26832e-07
HERPUD1	-4.98277	-0.312095	6.44654e-07	5.34808e-06
HELZ	-3.60998	-0.312098	0.000308773	0.00154046
PRR14L	-4.03591	-0.312654	5.51033e-05	0.00032663
ZNF480	-3.88017	-0.312806	0.000105513	0.000590339
SETX	-5.24832	-0.312947	1.59e-07	1.42867e-06
CDC27	-4.34535	-0.313798	1.41373e-05	9.38982e-05
TOR1AIP1	-5.15459	-0.313869	2.62654e-07	2.28258e-06
SH2D1A	-7.71399	-0.314328	1.41701e-14	2.84812e-13
ST8SIA4	-4.55616	-0.314398	5.3139e-06	3.79187e-05
API5	-5.34555	-0.314523	9.35899e-08	8.74721e-07
TRAFD1	-3.7946	-0.314905	0.00014939	0.000806337
ZC3H11A	-3.18918	-0.315181	0.00143446	0.00597277
PSD4	-3.98642	-0.315462	6.79003e-05	0.000395553
GPBP1	-5.10064	-0.315483	3.49327e-07	2.99696e-06
RLIM	-4.15317	-0.315746	3.32555e-05	0.000204187
AKNA	-4.84751	-0.316184	1.28348e-06	1.01489e-05
MKLN1	-3.36724	-0.316366	0.000764231	0.00343848
TRIP12	-4.62611	-0.316518	3.80598e-06	2.77646e-05
NAA15	-4.0534	-0.31718	5.11308e-05	0.0003048
GOLGA4	-5.53758	-0.317464	3.19954e-08	3.20288e-07
AUH	-3.86424	-0.317732	0.000112593	0.000626216
GSPT1	-6.33025	-0.317835	2.62566e-10	3.43438e-09
STARD7	-5.72762	-0.318049	1.06884e-08	1.1398e-07
MAK16	-3.37687	-0.318634	0.000738002	0.00333415
STK38L	-3.90734	-0.319049	9.43778e-05	0.000532818
RAB5B	-3.33306	-0.319694	0.000864381	0.0038164
STAT1	-9.45459	-0.319792	4.5356e-21	1.49782e-19
SRRM2	-8.15259	-0.320275	4.30431e-16	9.85052e-15
SMARCC1	-6.22628	-0.320462	5.10723e-10	6.43897e-09
TRIM69	-5.13229	-0.320742	2.95502e-07	2.54929e-06
ATXN2L	-4.18328	-0.320876	2.91544e-05	0.000181842
TASOR2	-3.48575	-0.321057	0.000494331	0.00235232
IFIT2	-3.18769	-0.321082	0.00144203	0.00599452
IDH3A	-5.1523	-0.32195	2.65677e-07	2.30755e-06
PPP6R3	-3.97334	-0.322025	7.17403e-05	0.000416186
VCP	-7.00906	-0.322139	2.66332e-12	4.29149e-11
DYNC1LI2	-3.87871	-0.323437	0.000106172	0.000593731
DDIT3	-4.93081	-0.323523	8.42167e-07	6.8789e-06
XPOT	-3.43596	-0.323535	0.000594552	0.00276327
MED13	-3.14643	-0.32406	0.00166116	0.00678787
SLC16A1	-4.00261	-0.324594	6.34144e-05	0.000371251
POC1B	-4.65007	-0.32466	3.39024e-06	2.5005e-05
PCNT	-4.45686	-0.325066	8.47234e-06	5.842e-05
CKAP2	-6.03993	-0.325598	1.63039e-09	1.94532e-08
HNRNPH3	-9.0089	-0.326085	2.76208e-19	8.06093e-18
NCOA3	-4.58474	-0.326466	4.63975e-06	3.3497e-05
AP3D1	-4.26296	-0.327075	2.04848e-05	0.000131682
KNSTRN	-4.35737	-0.327078	1.33815e-05	8.91095e-05
HIST1H2AB	-3.85806	-0.32721	0.000115588	0.000641012
KPNA2	-5.43259	-0.327219	5.76544e-08	5.58575e-07
SMARCA2	-5.46618	-0.327408	4.79768e-08	4.68659e-07
NFX1	-3.50444	-0.327564	0.000461058	0.00221181
GNPNAT1	-4.33975	-0.328325	1.45066e-05	9.59631e-05
NUP58	-5.77677	-0.328598	7.99969e-09	8.6815e-08
C12orf75	-7.29533	-0.328913	3.37275e-13	5.91908e-12
ELL2	-3.99005	-0.329188	6.68691e-05	0.000389841
TTC9C	-4.37086	-0.329406	1.2591e-05	8.43461e-05
TSPYL2	-3.56596	-0.329738	0.000365567	0.00179836
IL10RA	-5.38628	-0.329891	7.48118e-08	7.09376e-07
SNX10	-7.69403	-0.330721	1.66053e-14	3.29873e-13
ARID4A	-5.00039	-0.331062	5.89001e-07	4.9076e-06
NSD2	-5.53371	-0.331198	3.27019e-08	3.27147e-07
LYAR	-5.20687	-0.331312	1.98616e-07	1.75995e-06
GARS	-6.53365	-0.33159	6.96528e-11	9.59272e-10
TNPO3	-4.92445	-0.332295	8.6935e-07	7.08585e-06
GPR137	-4.44405	-0.332763	8.98914e-06	6.1817e-05
DIS3	-5.02397	-0.333253	5.21438e-07	4.38031e-06
HELB	-4.21714	-0.333925	2.51267e-05	0.000158719
SPAG9	-4.47252	-0.333939	7.87735e-06	5.46609e-05
STX18	-4.44289	-0.334302	9.04138e-06	6.21205e-05
EPB41	-5.0321	-0.335281	5.00311e-07	4.21667e-06
VPS37B	-3.45226	-0.335354	0.000559986	0.0026185
ZNF92	-4.0689	-0.335891	4.78697e-05	0.000286808
THEMIS	-3.57809	-0.337005	0.00034902	0.00172444
CDC42EP3	-4.43971	-0.337899	9.17388e-06	6.28622e-05
PRRC2B	-5.05927	-0.338038	4.34124e-07	3.6933e-06
SSR1	-6.50161	-0.339166	8.60918e-11	1.17305e-09
PUM2	-4.25078	-0.339172	2.16356e-05	0.000138374
EIF4G1	-7.00238	-0.339365	2.80049e-12	4.49836e-11
PTPN11	-5.18722	-0.339509	2.20622e-07	1.94148e-06
DDI2	-4.17215	-0.339684	3.06076e-05	0.000190056
ATP9B	-3.12296	-0.340138	0.00179967	0.00727065
CSDE1	-8.76792	-0.340355	2.34961e-18	6.37467e-17
AP1G1	-3.34665	-0.340393	0.000823203	0.00366091
ARL4A	-4.219	-0.340447	2.4916e-05	0.000157518
TGOLN2	-7.64162	-0.341302	2.49336e-14	4.85888e-13
ANKZF1	-3.25836	-0.34142	0.00112707	0.00484122
ATG14	-3.23827	-0.341525	0.00120968	0.00515424
PLAAT4	-4.49371	-0.341675	7.1451e-06	4.99409e-05
SPA17	-3.68431	-0.342007	0.000231374	0.00119348
PEA15	-5.27715	-0.342273	1.35967e-07	1.23399e-06
TRAF6	-3.66432	-0.342545	0.000250218	0.00127993
SLC9A8	-3.38448	-0.342898	0.000717904	0.00325388
PGRMC1	-6.71905	-0.342918	2.00331e-11	2.93259e-10
CETN3	-3.84278	-0.343012	0.00012295	0.000677683
PARG	-3.19365	-0.34314	0.00141231	0.00588852
ZNF512	-3.37844	-0.343297	0.000733828	0.00331822
HIVEP2	-4.72826	-0.343317	2.31886e-06	1.76105e-05
NOC3L	-6.31339	-0.343354	2.9295e-10	3.80588e-09
ETS1	-8.38317	-0.34341	6.39547e-17	1.55394e-15
C1orf109	-3.08017	-0.343413	0.00207848	0.00826441
PYROXD1	-4.6693	-0.343632	3.09069e-06	2.29714e-05
USP33	-4.20269	-0.343711	2.67877e-05	0.000168173
UBR5	-4.56465	-0.344278	5.10812e-06	3.65859e-05
ERV3-1	-3.09325	-0.344487	0.0019891	0.00794192
NGLY1	-5.31299	-0.344608	1.11845e-07	1.03029e-06
AC058791.1	-3.12904	-0.345152	0.00176261	0.00713784
PKD2	-3.05079	-0.34522	0.0022929	0.00900044
SETD3	-4.03194	-0.345947	5.60317e-05	0.000331264
CYTH1	-5.12367	-0.346433	3.09513e-07	2.66566e-06
GFPT1	-3.23386	-0.347058	0.00122811	0.00521972
METTL16	-3.18594	-0.34706	0.00145084	0.00602462
SND1	-6.49205	-0.347061	9.16018e-11	1.24481e-09
SYMPK	-3.28863	-0.347259	0.00101282	0.00440091
TMEM184C	-3.19222	-0.34751	0.00141937	0.0059139
ZBTB24	-5.29841	-0.348168	1.21164e-07	1.1108e-06
ITK	-7.53786	-0.349156	5.51556e-14	1.04564e-12
RNF44	-3.7792	-0.349605	0.000158907	0.000850531
ERCC3	-3.56498	-0.34964	0.000366855	0.00180212
IARS	-5.66695	-0.349778	1.5235e-08	1.59692e-07
UGP2	-7.51888	-0.349838	6.36025e-14	1.19943e-12
NKRF	-3.1197	-0.349913	0.00181932	0.00733651
CDKN3	-6.68532	-0.35027	2.50001e-11	3.62172e-10
AC025171.2	-3.15699	-0.350578	0.00160225	0.00658571
TIFA	-6.60725	-0.350733	4.26075e-11	6.01915e-10
ZNF736	-3.71236	-0.350769	0.000207287	0.00107938
FNIP1	-3.64041	-0.350938	0.000274599	0.00138663
EIF4G2	-9.21224	-0.351005	4.34593e-20	1.36196e-18
SEC24B	-3.46228	-0.351372	0.000539519	0.0025367
RNF4	-5.92525	-0.35156	3.2964e-09	3.75965e-08
GTF2H1	-4.13137	-0.351747	3.65771e-05	0.0002228
IER3	-6.85766	-0.35193	7.67878e-12	1.17446e-10
PPID	-7.99289	-0.351932	1.57236e-15	3.44439e-14
PRMT3	-3.21883	-0.352074	0.0012942	0.00546282
BNIP3	-4.36484	-0.352521	1.29382e-05	8.63447e-05
SEL1L	-3.60584	-0.352849	0.000313778	0.00156223
CANX	-9.83041	-0.353048	1.2468e-22	4.44219e-21
NFATC3	-4.07834	-0.35357	4.59784e-05	0.000276338
CLK4	-3.90289	-0.353718	9.61327e-05	0.000541928
ZNF507	-3.46598	-0.353793	0.00053228	0.00250877
GK	-5.10891	-0.354425	3.34171e-07	2.87481e-06
TMEM260	-3.02841	-0.354623	0.00246994	0.00961918
TRIP11	-5.29366	-0.355162	1.24392e-07	1.13768e-06
GPHN	-3.35338	-0.355463	0.000803574	0.0035892
SETD5	-4.29596	-0.355676	1.76765e-05	0.00011492
DOCK11	-3.47918	-0.356097	0.000506717	0.00240381
SNIP1	-4.26004	-0.356367	2.07662e-05	0.000133258
MICAL1	-3.43487	-0.356655	0.00059701	0.00277221
CCDC93	-3.13238	-0.356944	0.001743	0.00707145
CCNA2	-4.28746	-0.356974	1.83639e-05	0.000119086
ZNF141	-4.44097	-0.357394	9.12829e-06	6.26056e-05
FOXP3	-7.02223	-0.35749	2.41893e-12	3.91001e-11
PLEKHA2	-4.16982	-0.357549	3.09341e-05	0.000191696
FLI1	-4.09932	-0.357578	4.20106e-05	0.000253882
ZNF189	-3.66416	-0.357881	0.0002504	0.00128043
2006-03-01	-3.36383	-0.3581	0.00077379	0.00347639
RRP12	-3.04113	-0.35919	0.00236742	0.00925984
E2F3	-5.3229	-0.359298	1.05978e-07	9.78593e-07
WASL	-4.14358	-0.359313	3.46821e-05	0.000212267
NIBAN1	-5.29356	-0.359441	1.24323e-07	1.13768e-06
ZNF841	-3.75285	-0.359978	0.000176624	0.000934288
GLG1	-4.71565	-0.360255	2.46734e-06	1.86276e-05
DUS4L	-3.64673	-0.360467	0.000267953	0.00135709
DOCK10	-6.74458	-0.360482	1.6816e-11	2.48772e-10
KDM5D	-3.14576	-0.360711	0.00166528	0.00679926
ANP32E	-9.40558	-0.360726	7.16473e-21	2.33591e-19
DYRK1A	-3.39833	-0.360857	0.000682565	0.003113
HIST3H2A	-4.76865	-0.360886	1.89968e-06	1.46443e-05
DESI1	-6.94676	-0.360926	4.14947e-12	6.48872e-11
SLC30A7	-4.29226	-0.360992	1.79766e-05	0.000116772
TXLNA	-4.20733	-0.361031	2.62263e-05	0.000164986
SBNO1	-3.81697	-0.361476	0.000136517	0.000744442
MYH9	-9.17254	-0.361981	6.23067e-20	1.90974e-18
LTB	-8.88112	-0.362084	8.71477e-19	2.4156e-17
IQGAP1	-9.64926	-0.362155	7.22155e-22	2.45885e-20
DCAF17	-3.13284	-0.362345	0.00174003	0.00706317
CFAP97	-5.48544	-0.362509	4.29763e-08	4.22229e-07
SART3	-4.08598	-0.362655	4.4504e-05	0.000268106
ZNF669	-4.66776	-0.36269	3.115e-06	2.31193e-05
ERAP1	-4.15002	-0.363332	3.37374e-05	0.000206897
PRPF8	-6.95941	-0.363794	3.79852e-12	5.97271e-11
RNF185	-3.15171	-0.364147	0.00163153	0.00668813
FAM160B1	-3.65315	-0.364253	0.000261385	0.00132908
GCSAM	-3.56225	-0.364874	0.000370609	0.00181649
HIST1H4E	-4.25303	-0.365264	2.14363e-05	0.000137271
TFCP2	-3.16802	-0.365855	0.00154296	0.00637098
EXOSC10	-5.79497	-0.366119	7.19642e-09	7.86535e-08
RICTOR	-3.9242	-0.366962	8.80446e-05	0.000501489
LINC-PINT	-4.87069	-0.367557	1.14132e-06	9.12346e-06
MORC3	-5.09914	-0.367655	3.52262e-07	3.01861e-06
EZR	-10.4122	-0.36789	3.60921e-25	1.47011e-23
NPC2	-5.83587	-0.368012	5.65296e-09	6.28125e-08
BRD8	-4.44385	-0.368174	8.99818e-06	6.18514e-05
TFE3	-4.1686	-0.368994	3.10942e-05	0.000192456
ZNF708	-4.09359	-0.369036	4.30605e-05	0.000259818
MBD1	-4.26233	-0.369539	2.0562e-05	0.000132113
HERC4	-4.27394	-0.369661	1.95227e-05	0.000126016
GBF1	-3.87095	-0.370638	0.000109648	0.000610498
NFKB2	-6.99744	-0.370701	2.89698e-12	4.6388e-11
CAB39	-4.66165	-0.370858	3.20848e-06	2.37558e-05
SDC4	-4.29899	-0.371384	1.74441e-05	0.000113505
SMARCD2	-3.02684	-0.371597	0.00248228	0.00966234
PRKAR1A	-8.29422	-0.371706	1.34135e-16	3.17377e-15
DDB1	-6.10488	-0.371993	1.09555e-09	1.3373e-08
CACUL1	-4.33069	-0.372191	1.51163e-05	9.9552e-05
QRICH1	-4.90557	-0.372494	9.57905e-07	7.75413e-06
FCF1	-4.77706	-0.372612	1.82332e-06	1.40911e-05
NEAT1	-7.65618	-0.37344	2.22446e-14	4.36217e-13
SEC16A	-4.24869	-0.373571	2.18506e-05	0.000139633
VPS35L	-4.63551	-0.373897	3.6389e-06	2.66852e-05
PIBF1	-3.64555	-0.374001	0.000269175	0.00136283
CASC4	-4.52777	-0.374029	6.08205e-06	4.30396e-05
CDKN1B	-7.18796	-0.374347	7.41411e-13	1.24974e-11
NOB1	-8.00768	-0.374413	1.39497e-15	3.07334e-14
RANBP6	-4.33072	-0.374514	1.51182e-05	9.9552e-05
UBXN7	-4.1594	-0.374534	3.23675e-05	0.000199452
RC3H2	-4.46754	-0.374558	8.06768e-06	5.59058e-05
CBY1	-3.01732	-0.374602	0.00256129	0.00994214
DPP9	-4.48229	-0.374699	7.52721e-06	5.24208e-05
HSP90B1	-10.6952	-0.374911	1.86218e-26	8.24081e-25
UBE2S	-6.82789	-0.37505	9.43725e-12	1.432e-10
DNAJC18	-3.62021	-0.375335	0.000296875	0.00148883
CRTC2	-5.32783	-0.37546	1.03111e-07	9.5441e-07
SURF6	-4.93176	-0.375835	8.38286e-07	6.85083e-06
MAP3K7	-3.91068	-0.376751	9.307e-05	0.00052692
EXO1	-3.59408	-0.377389	0.000328285	0.00163091
VCPIP1	-4.37714	-0.37747	1.22349e-05	8.21867e-05
ATG4D	-3.40848	-0.377693	0.000657848	0.0030146
TRMO	-5.05739	-0.37788	4.38232e-07	3.72206e-06
BRD4	-7.06963	-0.378327	1.73447e-12	2.84557e-11
ZNF816	-3.91609	-0.378395	9.10546e-05	0.000516144
EIF3A	-9.38315	-0.378705	8.94981e-21	2.90557e-19
HDGF	-7.20497	-0.378721	6.5334e-13	1.10981e-11
PCM1	-8.15733	-0.378827	4.16613e-16	9.56279e-15
PSME3	-6.6065	-0.379115	4.28647e-11	6.04991e-10
DCTN4	-4.4785	-0.37942	7.66309e-06	5.33187e-05
KAT6A	-4.71286	-0.379444	2.50187e-06	1.88605e-05
TAP2	-7.19192	-0.379628	7.17674e-13	1.21372e-11
EPS15L1	-3.47162	-0.379683	0.000521214	0.00246497
EP300	-3.43733	-0.380122	0.000591694	0.00275252
TMED5	-5.3248	-0.380185	1.04978e-07	9.70544e-07
HIST1H4I	-3.20338	-0.381214	0.001366	0.00572967
PPP3R1	-4.17008	-0.381215	3.0905e-05	0.000191594
ZNF550	-3.29867	-0.381271	0.000977368	0.00426498
ABHD2	-4.03194	-0.381401	5.60448e-05	0.000331264
HSPA13	-4.01919	-0.381462	5.91553e-05	0.000347775
GDI2	-11.6879	-0.381959	3.29421e-31	1.8462e-29
APOL2	-4.69254	-0.382201	2.76131e-06	2.06339e-05
NEK2	-3.89456	-0.38251	9.94217e-05	0.000558829
RABGAP1	-3.1288	-0.382527	0.00176448	0.0071435
TMF1	-6.06364	-0.382568	1.41483e-09	1.69339e-08
MRTFA	-4.74942	-0.382967	2.09039e-06	1.601e-05
GFM2	-3.30572	-0.382975	0.000953239	0.00416798
ZNF43	-4.89749	-0.384019	9.97299e-07	8.03912e-06
RFXAP	-3.41558	-0.384021	0.000640897	0.00294836
VPS37A	-3.95216	-0.384232	7.83982e-05	0.000450893
HIST2H2BF	-4.37798	-0.384701	1.21964e-05	8.1964e-05
EDRF1	-3.9268	-0.384792	8.71022e-05	0.000496747
RBM15B	-3.47044	-0.384899	0.000523523	0.00247437
ZNF91	-5.32468	-0.385064	1.0498e-07	9.70544e-07
TNIP2	-6.08388	-0.38518	1.24805e-09	1.50906e-08
ZC3HAV1	-5.4043	-0.385255	6.77185e-08	6.47097e-07
GEMIN5	-3.23263	-0.385503	0.0012336	0.0052387
ERAP2	-7.05004	-0.385705	1.99909e-12	3.25536e-11
ALG14	-3.37233	-0.385842	0.000750312	0.00338478
ZNF28	-3.28572	-0.385913	0.00102329	0.00444263
ZNF398	-3.91979	-0.386428	8.96525e-05	0.000509324
KCTD10	-3.97838	-0.386448	7.02403e-05	0.000407947
KIF3B	-3.6442	-0.386465	0.000270621	0.00136879
ACSL5	-4.56367	-0.386914	5.13129e-06	3.67177e-05
SMAD7	-3.48024	-0.387221	0.000504768	0.00239531
TBK1	-3.44039	-0.387367	0.000584979	0.00272541
ZNF638	-6.79228	-0.387463	1.216e-11	1.82609e-10
ATF7IP	-6.78977	-0.387525	1.23548e-11	1.85274e-10
NEK9	-4.70772	-0.387617	2.56371e-06	1.9251e-05
ZNF354A	-3.45644	-0.387748	0.000551383	0.00258378
KIAA1109	-3.56467	-0.388161	0.000367372	0.00180293
TTPAL	-3.05528	-0.388864	0.0022589	0.00888745
SFPQ	-10.5839	-0.388917	6.02497e-26	2.60618e-24
HARS2	-3.60975	-0.38913	0.000309146	0.00154181
ELMOD3	-3.16232	-0.389177	0.00157328	0.00648744
DIS3L2	-3.40536	-0.389186	0.000665354	0.00304354
DNAJB1	-5.74996	-0.389375	9.40331e-09	1.01048e-07
DAP	-6.30879	-0.390412	3.01842e-10	3.91808e-09
TBRG1	-7.35448	-0.390627	2.18376e-13	3.91293e-12
ARHGAP17	-4.1992	-0.390723	2.71921e-05	0.000170573
IREB2	-4.02973	-0.390971	5.6581e-05	0.000334176
ISG20L2	-5.14636	-0.391303	2.74253e-07	2.37666e-06
SLC39A9	-3.32789	-0.391478	0.000880786	0.0038781
ZNF227	-4.36369	-0.391565	1.30147e-05	8.68172e-05
ZNF160	-6.02048	-0.391968	1.8473e-09	2.1922e-08
INTS13	-4.72762	-0.39213	2.32555e-06	1.76525e-05
LARP4B	-3.22369	-0.392437	0.00127256	0.00538182
ZC3H7B	-3.38947	-0.392443	0.000704944	0.00319891
CPVL	-3.12464	-0.393018	0.00178869	0.00723008
FBXL4	-3.97925	-0.393165	6.99935e-05	0.000406667
TUT7	-4.3376	-0.393434	1.46534e-05	9.6782e-05
CUX1	-3.67835	-0.394059	0.000236967	0.00121987
PIKFYVE	-3.54503	-0.394488	0.000395894	0.00192628
STRIP2	-5.80142	-0.394842	6.92742e-09	7.58755e-08
ACIN1	-8.39506	-0.394926	5.78711e-17	1.41283e-15
POLR3E	-3.4976	-0.395048	0.000473042	0.00226153
PYCARD	-8.25488	-0.395125	1.86544e-16	4.36671e-15
SPINT2	-6.00218	-0.395357	2.06596e-09	2.4273e-08
WDR26	-3.05131	-0.395964	0.00228896	0.00898958
RRN3	-4.92559	-0.396125	8.64984e-07	7.05401e-06
C5orf22	-4.14216	-0.396149	3.48936e-05	0.000213476
KDM2B	-3.47815	-0.396532	0.000508675	0.00241236
ANKRD17	-5.41726	-0.397247	6.29791e-08	6.05957e-07
RETREG3	-3.31938	-0.39777	0.00090793	0.0039869
RORA	-5.88771	-0.397907	4.13329e-09	4.65669e-08
KLHL12	-3.37968	-0.398148	0.00073065	0.00330774
MOB1A	-7.72262	-0.39873	1.3327e-14	2.6857e-13
ZNF254	-3.61429	-0.398788	0.000303752	0.00151787
ZNF486	-3.70332	-0.398982	0.000214819	0.00111407
PRDM2	-7.36207	-0.39957	2.05761e-13	3.70418e-12
NUF2	-6.10246	-0.399728	1.11084e-09	1.35381e-08
DZIP3	-3.51162	-0.400787	0.000448772	0.00215691
TMEM120A	-4.16152	-0.400803	3.20755e-05	0.00019805
UHRF1BP1L	-5.05808	-0.400898	4.36425e-07	3.71082e-06
DDX6	-7.73566	-0.401037	1.20622e-14	2.44364e-13
SGSH	-3.14057	-0.401151	0.00169477	0.00690498
C17orf58	-3.14357	-0.401158	0.0016772	0.00684066
CITED2	-5.34395	-0.401333	9.45501e-08	8.81549e-07
KLC1	-4.04314	-0.401791	5.3441e-05	0.000317339
CCNG1	-8.07724	-0.401861	7.97504e-16	1.78781e-14
SACM1L	-4.31552	-0.402174	1.61892e-05	0.000106195
IPO9	-4.49471	-0.402321	7.106e-06	4.96902e-05
STK10	-5.80347	-0.402793	6.84081e-09	7.50655e-08
ATP13A1	-3.92174	-0.403492	8.89542e-05	0.000506106
HNRNPU	-13.3233	-0.4043	6.39162e-40	4.71873e-38
THAP5	-6.17073	-0.404469	7.25823e-10	8.96708e-09
PREPL	-4.06929	-0.404615	4.78139e-05	0.000286585
DUSP10	-6.88114	-0.404727	6.55698e-12	1.01093e-10
IFI6	-7.30691	-0.405203	3.1184e-13	5.49153e-12
PPM1K	-5.38108	-0.405349	7.7008e-08	7.26819e-07
HECTD4	-3.06996	-0.405363	0.00215123	0.0085118
HAGHL	-4.30111	-0.406206	1.72814e-05	0.000112614
TCF20	-3.07984	-0.406677	0.00208128	0.00827339
INPP5D	-5.19355	-0.406947	2.13441e-07	1.88476e-06
ZSCAN12	-3.22862	-0.407035	0.00125093	0.00530203
HACD2	-3.53935	-0.408452	0.00040445	0.00196418
MED17	-3.62878	-0.408554	0.000287344	0.00144766
WDR44	-3.03538	-0.409618	0.00241303	0.00941905
NOTCH2NLA	-3.836	-0.410168	0.000126386	0.000693882
NFYA	-3.06352	-0.410515	0.00219802	0.00867457
AEBP2	-6.80079	-0.411916	1.14607e-11	1.7254e-10
ACSL4	-5.74155	-0.412437	9.85707e-09	1.05628e-07
GOLGA5	-3.73851	-0.412788	0.000186966	0.000981557
TMPO	-10.4724	-0.413242	1.95615e-25	8.14054e-24
LSG1	-5.37755	-0.413445	7.85552e-08	7.40512e-07
TNKS2	-5.00618	-0.413728	5.72016e-07	4.78164e-06
IMPAD1	-3.20554	-0.415953	0.00135549	0.0056886
RBM5	-5.04166	-0.41596	4.76279e-07	4.02517e-06
KMT2A	-8.30786	-0.416437	1.20413e-16	2.85348e-15
LATS1	-4.77457	-0.416918	1.84654e-06	1.42561e-05
CLPX	-4.26017	-0.417223	2.07569e-05	0.000133254
MKNK2	-3.52897	-0.417827	0.000420432	0.00203407
FAM160B2	-3.29107	-0.418303	0.00100432	0.00437018
HLA-F	-9.68359	-0.418352	5.17247e-22	1.77296e-20
CC2D1B	-3.31259	-0.418385	0.000930227	0.00407897
DDX3X	-5.31029	-0.418798	1.1365e-07	1.04504e-06
USP25	-3.43964	-0.419112	0.000586778	0.00273296
INPP4A	-3.66766	-0.419731	0.00024714	0.00126693
UGGT1	-4.39405	-0.421395	1.13289e-05	7.66034e-05
ATP13A3	-3.06783	-0.421427	0.00216652	0.00856125
NFE2L1	-3.74493	-0.421491	0.000182299	0.000959965
CHRNA6	-4.7845	-0.421638	1.75667e-06	1.3624e-05
RBM41	-3.39253	-0.421659	0.000697267	0.00317063
ACSL1	-3.03236	-0.422255	0.00243753	0.00950501
HTATIP2	-7.94454	-0.423275	2.32459e-15	5.01354e-14
FAM3C	-3.37667	-0.423371	0.000738639	0.00333604
ABCC1	-4.31021	-0.423899	1.65843e-05	0.000108416
ADAM17	-3.56543	-0.423976	0.000366316	0.00180005
RFK	-5.16839	-0.424628	2.44154e-07	2.13024e-06
MYO1G	-10.074	-0.424836	1.107e-23	4.24979e-22
ZMYND11	-3.45594	-0.425459	0.000552495	0.0025882
ARHGEF2	-3.77935	-0.426074	0.000158828	0.000850406
CSGALNACT2	-4.88988	-0.42635	1.03646e-06	8.32419e-06
FAM214A	-3.50205	-0.426431	0.000465324	0.00222879
ATP2A2	-3.0737	-0.426523	0.00212446	0.00841888
VPS13C	-6.65998	-0.426615	2.9977e-11	4.29009e-10
HIST1H3A	-3.44766	-0.426636	0.000569606	0.00265943
IGF2R	-3.78901	-0.426888	0.000152789	0.000823238
WWOX	-5.01857	-0.426912	5.36266e-07	4.49749e-06
ZNF791	-6.78033	-0.427025	1.3237e-11	1.97347e-10
KDM4C	-3.45686	-0.427495	0.000550802	0.00258184
EAF1	-4.28122	-0.427563	1.88942e-05	0.000122318
BORA	-3.8401	-0.427622	0.000124318	0.000683504
TEX10	-3.64893	-0.42764	0.000265722	0.00134757
ZNF182	-4.8112	-0.428676	1.53897e-06	1.20301e-05
ARHGAP11A	-4.85939	-0.428816	1.20853e-06	9.60073e-06
SNRK	-5.24498	-0.429035	1.62099e-07	1.45397e-06
POLR3A	-3.34518	-0.429103	0.000827782	0.00367701
SRCAP	-3.84747	-0.429386	0.000120642	0.000666153
ODF2	-5.23232	-0.429505	1.73275e-07	1.54698e-06
SLC39A8	-5.60817	-0.42973	2.14003e-08	2.19962e-07
GRK6	-3.84314	-0.429956	0.000122786	0.000677018
SENP5	-3.92213	-0.43003	8.88283e-05	0.000505577
PDLIM2	-4.57118	-0.430047	4.95266e-06	3.56054e-05
BUB1B	-3.93545	-0.430086	8.40186e-05	0.000480517
HIST1H2AM	-6.3172	-0.430572	2.87761e-10	3.74162e-09
SPATA2	-3.57009	-0.430623	0.000359784	0.00177249
FAM76A	-3.29075	-0.43113	0.00100534	0.00437337
KAT7	-4.37916	-0.431131	1.21328e-05	8.16241e-05
FAM98B	-5.32268	-0.43118	1.0615e-07	9.7959e-07
TMEM41A	-5.82555	-0.431709	6.00031e-09	6.64135e-08
ATG2B	-3.03135	-0.43206	0.00244566	0.00953427
SUPT6H	-7.43399	-0.43251	1.21017e-13	2.22555e-12
KDM3A	-4.17733	-0.432688	2.99447e-05	0.000186468
SPAG5	-4.95795	-0.434018	7.32746e-07	6.01714e-06
IK	-11.0659	-0.434553	3.48858e-28	1.67408e-26
EDEM3	-4.08841	-0.43462	4.40545e-05	0.000265607
TTC17	-5.59441	-0.434772	2.31842e-08	2.36713e-07
OPTN	-7.28063	-0.43488	3.76088e-13	6.58519e-12
HIST1H2BL	-3.43235	-0.43506	0.000602667	0.00279678
APOL1	-3.16208	-0.435807	0.00157477	0.00649186
DDX5	-15.5154	-0.43602	3.05183e-53	3.60492e-51
SETDB2	-3.80678	-0.436692	0.000142323	0.000771994
DCP1B	-4.97138	-0.436873	6.84675e-07	5.65566e-06
NOP14	-7.24946	-0.437012	4.73947e-13	8.20511e-12
TNIP1	-8.86349	-0.437032	1.01286e-18	2.80244e-17
MTA2	-5.68105	-0.437118	1.40595e-08	1.47876e-07
PDS5A	-6.28076	-0.437364	3.61817e-10	4.62234e-09
TLK2	-3.53982	-0.437782	0.000403543	0.00196164
SETD1B	-3.14976	-0.437792	0.00164266	0.00672659
PCNX4	-4.3946	-0.437823	1.13071e-05	7.65237e-05
YTHDF3	-4.86903	-0.438198	1.15172e-06	9.19702e-06
ZNF121	-5.28912	-0.438216	1.27467e-07	1.16028e-06
PITPNA	-3.34598	-0.438556	0.000825239	0.00366677
AHCTF1	-5.71555	-0.438716	1.14906e-08	1.22195e-07
ASH1L	-6.78515	-0.439155	1.27654e-11	1.91058e-10
SAMD9L	-6.97498	-0.439476	3.40755e-12	5.40561e-11
SLC30A9	-5.83159	-0.4397	5.79785e-09	6.42365e-08
MAP3K11	-3.41084	-0.44026	0.000652109	0.00299276
GAR1	-7.77708	-0.442288	8.72502e-15	1.78642e-13
TWSG1	-3.37164	-0.44232	0.000752252	0.00339253
MT-ND5	-20.1279	-0.442735	4.32045e-87	1.22861e-84
SLC37A3	-5.85087	-0.442801	5.15851e-09	5.74848e-08
INPP5B	-3.16687	-0.443138	0.00154923	0.00639514
MFAP3	-3.26475	-0.443263	0.00110233	0.00474155
SIN3A	-6.19175	-0.443656	6.37059e-10	7.93404e-09
CHST12	-3.89203	-0.443778	0.000100557	0.000564798
ELAC2	-5.97198	-0.443935	2.48672e-09	2.88197e-08
ZNF107	-5.94979	-0.444136	2.84791e-09	3.27094e-08
IGHMBP2	-3.17739	-0.44422	0.00149437	0.00618867
MCM3AP	-4.74073	-0.444471	2.18297e-06	1.66443e-05
ZNF624	-3.19618	-0.444791	0.00140027	0.00584354
MT1H	-3.77942	-0.445202	0.000158702	0.000850028
CD46	-6.4898	-0.446015	9.32428e-11	1.26487e-09
CHMP7	-4.2618	-0.446228	2.06174e-05	0.000132414
USP11	-5.24238	-0.446551	1.64175e-07	1.47001e-06
NCOA6	-3.23509	-0.446552	0.00122312	0.00519995
IL12RB2	-5.72835	-0.446654	1.06399e-08	1.13541e-07
STAT2	-3.98844	-0.446773	6.73717e-05	0.000392623
KIAA0753	-3.13608	-0.446863	0.00172097	0.00699504
HUWE1	-8.37318	-0.446997	7.00466e-17	1.69391e-15
EFCAB14	-5.50533	-0.447644	3.84696e-08	3.79409e-07
TSR1	-5.29319	-0.44795	1.24693e-07	1.13975e-06
THAP2	-3.43146	-0.448063	0.000604824	0.0028051
AHR	-9.6289	-0.449782	8.7381e-22	2.96208e-20
PPP4R3B	-7.21379	-0.450327	6.1531e-13	1.04986e-11
UBR4	-6.4176	-0.450398	1.49735e-10	1.99421e-09
CTSS	-6.43991	-0.451128	1.29426e-10	1.73426e-09
ATXN2	-4.36705	-0.451288	1.28212e-05	8.56381e-05
TMED7	-4.96217	-0.452661	7.17558e-07	5.90821e-06
TDP2	-7.40868	-0.452708	1.4647e-13	2.67125e-12
TICAM1	-5.17268	-0.452718	2.38624e-07	2.08674e-06
TRIM26	-6.38715	-0.452749	1.82734e-10	2.41694e-09
PARP14	-7.90711	-0.453282	3.13647e-15	6.67086e-14
UBR2	-5.22744	-0.453352	1.78308e-07	1.58914e-06
TTK	-4.22906	-0.453804	2.38295e-05	0.000151209
JAK2	-4.32152	-0.453867	1.57643e-05	0.000103629
DDX58	-3.01871	-0.45433	0.00254968	0.00989961
ARSB	-3.55635	-0.455194	0.000379079	0.0018521
BAZ2A	-5.9663	-0.455548	2.57861e-09	2.97946e-08
COG3	-5.52146	-0.456209	3.51373e-08	3.49009e-07
LY75	-4.52466	-0.456239	6.17663e-06	4.36686e-05
GPR55	-3.45515	-0.456302	0.000554033	0.00259323
RBAK	-3.33124	-0.456343	0.000870169	0.00383974
STAT5B	-4.13865	-0.456352	3.54483e-05	0.000216576
TRAV12-1	-3.07147	-0.458133	0.00213929	0.00847109
ZNF606	-4.01862	-0.458592	5.93074e-05	0.000348536
ALCAM	-3.78104	-0.458916	0.000157736	0.000845445
ZNF780B	-3.70145	-0.459297	0.000216463	0.00112184
PHF23	-4.55535	-0.459332	5.3393e-06	3.80642e-05
AGTPBP1	-4.18393	-0.45995	2.90975e-05	0.000181561
ECT2	-3.90966	-0.460263	9.35137e-05	0.000528912
SMG7	-5.13893	-0.460381	2.85794e-07	2.47108e-06
HIVEP3	-3.28492	-0.461111	0.0010265	0.00445406
TAOK1	-4.13205	-0.461328	3.64862e-05	0.000222334
CEP95	-5.08946	-0.462072	3.70893e-07	3.17544e-06
TRAF3	-4.86256	-0.462372	1.19003e-06	9.47333e-06
ZFC3H1	-7.23519	-0.462669	5.25862e-13	9.07319e-12
TGFBR3	-3.5475	-0.462952	0.000392195	0.0019095
SLC4A7	-5.85118	-0.463917	5.15293e-09	5.74644e-08
CCNH	-7.71814	-0.465079	1.38511e-14	2.78765e-13
MDC1	-4.46974	-0.466027	7.98849e-06	5.53821e-05
YLPM1	-7.19414	-0.46621	7.11115e-13	1.20396e-11
[truncated: 769 more rows]

## Sheet: Table S4
Supplementary Table S4. Differentially expressed genes between GroupI and GroupII PM-Tregs.
Ensembl_Gene_ID	gene_name	gene_biotype	baseMean	log2FoldChange	pvalue
ENSG00000064787	BCAS1	protein_coding	170.578	2.57015	1.41489e-05
ENSG00000234268	RPS27P19	processed_pseudogene	56.1541	2.45573	3.83761e-05
ENSG00000188765	TMSB4XP2	unprocessed_pseudogene	58.5638	2.36789	3.35635e-05
ENSG00000226360	RPL10AP6	processed_pseudogene	201.102	2.14486	8.48064e-05
ENSG00000124191	TOX2	protein_coding	682.573	2.14366	1.26544e-05
ENSG00000215030	RPL13P12	processed_pseudogene	973.252	2.04994	0.000115359
ENSG00000198744	MTCO3P12	unprocessed_pseudogene	436.798	1.94839	0.000158762
ENSG00000134460	IL2RA	protein_coding	7122.8	1.89724	0.000140152
ENSG00000228502	EEF1A1P11	processed_pseudogene	399.178	1.8528	7.20058e-05
ENSG00000231414	RPL39P15	processed_pseudogene	115.053	1.85269	0.000174583
ENSG00000250182	EEF1A1P13	processed_pseudogene	769.583	1.85213	0.000143569
ENSG00000234589	RPL13AP24	processed_pseudogene	251.552	1.83588	0.000244366
ENSG00000240914	RPL15P2	processed_pseudogene	68.3137	1.83472	0.000241652
ENSG00000219133	RPL21P19	processed_pseudogene	25.8598	1.8178	0.000258368
ENSG00000230202	RPL29P4	processed_pseudogene	172.887	1.80853	0.00011915
ENSG00000249264	EEF1A1P9	processed_pseudogene	463.056	1.80665	0.000209023
ENSG00000236439	RPS27P8	processed_pseudogene	98.3702	1.78312	0.000268187
ENSG00000213862	RPL7AP62	processed_pseudogene	36.7263	1.71327	0.00032503
ENSG00000213621	RPSAP54	processed_pseudogene	42.7252	1.67955	4.80232e-05
ENSG00000242088	RPS27P2	processed_pseudogene	32.3948	1.6413	0.000365042
ENSG00000241429	EEF1A1P25	processed_pseudogene	85.1642	1.62316	0.000261747
ENSG00000240350	SOCAR	lncRNA	172.578	1.60517	0.00011218
ENSG00000214199	EEF1A1P12	processed_pseudogene	180.214	1.59156	0.000352829
ENSG00000234287	RPS27P4	processed_pseudogene	119.184	1.57309	0.000473364
ENSG00000233476	EEF1A1P6	processed_pseudogene	1103.93	1.57017	0.000288144
ENSG00000196205	EEF1A1P5	processed_pseudogene	2420.54	1.55427	6.43958e-05
ENSG00000213261	EEF1B2P6	processed_pseudogene	26.4628	1.55351	0.000475378
ENSG00000223825	DAZAP2P1	processed_pseudogene	9.70912	1.54338	0.0005439
ENSG00000240087	RPSAP12	processed_pseudogene	67.1562	1.52782	0.000569617
ENSG00000226221	RPL26P19	processed_pseudogene	105.608	1.52609	0.000331677
ENSG00000258512	LINC00239	lncRNA	55.0178	1.51902	0.000330281
ENSG00000280721	LINC01943	lncRNA	624.375	1.517	0.000153158
ENSG00000183298	RPSAP19	processed_pseudogene	120.241	1.5141	0.000529858
ENSG00000121089	NACA3P	processed_pseudogene	52.1406	1.51299	0.00050515
ENSG00000102096	PIM2	protein_coding	5899.81	1.51295	3.85043e-07
ENSG00000005102	MEOX1	protein_coding	280.429	1.50167	0.000543496
ENSG00000178464	RPL10P16	processed_pseudogene	322.867	1.49978	0.000612233
ENSG00000237506	RPSAP15	processed_pseudogene	157.355	1.483	0.000636142
ENSG00000214389	RPS3AP26	processed_pseudogene	506.29	1.47898	0.000425068
ENSG00000233609	RPL10P19	transcribed_processed_pseudogene	75.6165	1.46778	0.000474797
ENSG00000242100	RPL9P32	processed_pseudogene	117.911	1.45914	0.000644708
ENSG00000136149	RPL13AP25	processed_pseudogene	486.52	1.44572	0.000642253
ENSG00000178429	RPS3AP5	processed_pseudogene	122.866	1.43916	0.00065519
ENSG00000188000	OR7D2	protein_coding	19.2297	1.43784	0.000504458
ENSG00000158427	TMSB15B	protein_coding	21.4793	1.40157	0.000422784
ENSG00000214541	RPS4XP3	processed_pseudogene	40.799	1.38065	0.000730153
ENSG00000214784	RPS3AP21	processed_pseudogene	48.0434	1.37974	0.000810156
ENSG00000212664	RPL17P39	processed_pseudogene	127.498	1.37625	0.000800876
ENSG00000104427	ZC2HC1A	protein_coding	357.787	1.37172	0.000773812
ENSG00000223803	RPS20P14	processed_pseudogene	84.1367	1.37142	0.000849903
ENSG00000242071	RPL7AP6	processed_pseudogene	207.47	1.36752	0.000632697
ENSG00000103522	IL21R	protein_coding	1617.48	1.35835	0.000295879
ENSG00000049768	FOXP3	protein_coding	8920.54	1.34647	0.000388715
ENSG00000220749	RPL21P28	processed_pseudogene	145.146	1.34182	0.000743995
ENSG00000249855	EEF1A1P19	processed_pseudogene	275.803	1.34097	0.000906726
ENSG00000229638	RPL4P4	processed_pseudogene	323.469	1.33986	0.000743071
ENSG00000188873	RPL10AP2	processed_pseudogene	83.8821	1.30455	0.000731446
ENSG00000213553	RPLP0P6	processed_pseudogene	410.047	1.30401	0.00072562
ENSG00000213399	RPS2P17	processed_pseudogene	29.0878	1.29662	0.000984332
ENSG00000259612	EEF1A1P22	processed_pseudogene	46.6537	1.28884	0.000676426
ENSG00000224631	RPS27AP16	transcribed_processed_pseudogene	329.878	1.28835	0.000979643
ENSG00000244073	RPS4XP6	processed_pseudogene	30.2072	1.2883	0.00104494
ENSG00000146677	RPL32P18	processed_pseudogene	133.427	1.28409	0.0010212
ENSG00000216866	RPS2P55	processed_pseudogene	48.5454	1.25933	0.000699346
ENSG00000187601	MAGEH1	protein_coding	1230.23	1.24638	0.000552016
ENSG00000205871	RPS3AP47	processed_pseudogene	125.38	1.23703	0.00120492
ENSG00000226525	RPS7P10	processed_pseudogene	107.312	1.23503	0.00119262
ENSG00000196218	RYR1	protein_coding	369.234	1.22352	0.00029657
ENSG00000231767	RPS27AP5	processed_pseudogene	114.62	1.2151	0.00125714
ENSG00000240371	RPS4XP13	processed_pseudogene	9.99469	1.21303	0.00109521
ENSG00000213757	RPS3AP20	processed_pseudogene	68.3151	1.20648	0.00128926
ENSG00000230734	RPL10P3	processed_pseudogene	12.1055	1.1976	0.00123694
ENSG00000219747	RPL32P16	processed_pseudogene	43.1298	1.19732	0.00110418
ENSG00000231369	RPL15P22	processed_pseudogene	38.3576	1.18221	0.00137922
ENSG00000250144	EEF1A1P35	processed_pseudogene	58.2625	1.17883	0.000862545
ENSG00000229807	XIST	lncRNA	37.4906	1.16563	0.000135499
ENSG00000243181	RPL21P80	processed_pseudogene	53.1793	1.16284	0.0014434
ENSG00000241282	RPL34P33	processed_pseudogene	24.8303	1.1616	0.000950221
ENSG00000226981	ABHD17AP6	unprocessed_pseudogene	22.8816	1.15452	0.00119911
ENSG00000049247	UTS2	protein_coding	64.3973	1.15063	0.00150579
ENSG00000245205	EEF1A1P4	processed_pseudogene	134.881	1.13363	0.000852045
ENSG00000043462	LCP2	protein_coding	5118.94	1.13296	9.28626e-05
ENSG00000197299	BLM	protein_coding	240.62	1.13094	0.00124046
ENSG00000184612	RPL7P26	processed_pseudogene	41.1903	1.1233	0.00157365
ENSG00000181524	RPL24P4	processed_pseudogene	160.948	1.11917	0.00159124
ENSG00000241081	RPL22P2	processed_pseudogene	30.6854	1.11833	0.00153007
ENSG00000185262	UBALD2	protein_coding	1745.28	1.10753	3.16393e-05
ENSG00000135898	GPR55	protein_coding	179.704	1.0915	0.00170815
ENSG00000234825	XRCC6P2	processed_pseudogene	64.6845	1.07865	0.00181713
ENSG00000224578	HNRNPA1L3	protein_coding	144.302	1.07022	0.00071143
ENSG00000110660	SLC35F2	protein_coding	618.756	1.05678	0.000556662
ENSG00000145247	OCIAD2	protein_coding	784.253	1.05559	0.000378987
ENSG00000164088	PPM1M	protein_coding	1116.8	1.05487	0.000113905
ENSG00000236312	RPL34P34	processed_pseudogene	70.5231	1.04773	0.00177732
ENSG00000242571	RPL21P11	processed_pseudogene	42.4111	1.04627	0.00198059
ENSG00000228205	RPS3P3	processed_pseudogene	67.9942	1.0403	0.00192321
ENSG00000158019	BABAM2	protein_coding	441.973	1.03777	0.000924792
ENSG00000126264	HCST	protein_coding	35.1799	1.03215	0.00153276
ENSG00000214223	HNRNPA1P10	processed_pseudogene	80.2003	1.02189	0.00203609
ENSG00000268222	EEF1A1P7	processed_pseudogene	22.3892	1.01409	0.00215159
ENSG00000140511	HAPLN3	protein_coding	2125.4	1.01288	0.00129981
ENSG00000254759	NAP1L1P1	processed_pseudogene	31.9863	1.01191	0.00208219
ENSG00000189343	RPS2P46	processed_pseudogene	211.888	1.01037	0.000492432
ENSG00000112667	DNPH1	protein_coding	450.959	1.00979	0.00132686
ENSG00000145882	PCYOX1L	protein_coding	688.461	1.00693	0.000446543
ENSG00000224858	RPL29P11	processed_pseudogene	29.3364	1.00467	0.00156263
ENSG00000232385	RPS3AP25	processed_pseudogene	58.6003	1.00095	0.00172189
ENSG00000106665	CLIP2	protein_coding	282.418	-1.00435	0.00124055
ENSG00000109814	UGDH	protein_coding	670.334	-1.01395	0.00184201
ENSG00000165917	RAPSN	protein_coding	60.7863	-1.0299	0.00206609
ENSG00000254087	LYN	protein_coding	1112.32	-1.03421	0.00202676
ENSG00000143776	CDC42BPA	protein_coding	175.642	-1.03939	0.00201679
ENSG00000095203	EPB41L4B	protein_coding	93.6533	-1.046	0.00108877
ENSG00000169504	CLIC4	protein_coding	4238.06	-1.04631	0.00161065
ENSG00000282282	IGKV1-16	IG_V_gene	21.0902	-1.05849	0.000732857
ENSG00000101084	RAB5IF	protein_coding	138.618	-1.05876	0.000988591
ENSG00000236320	SLFN14	protein_coding	42.9477	-1.06418	0.00188255
ENSG00000239887	C1orf226	protein_coding	29.7206	-1.06839	0.000872592
ENSG00000184293	CLECL1P	transcribed_unitary_pseudogene	207.32	-1.07538	0.00179654
ENSG00000160293	VAV2	protein_coding	571.961	-1.08456	0.0015622
ENSG00000166900	STX3	protein_coding	366.535	-1.08501	0.00150543
ENSG00000163661	PTX3	protein_coding	213.485	-1.0899	0.000892587
ENSG00000211897	IGHG3	IG_C_gene	388.503	-1.09234	0.00135888
ENSG00000144645	OSBPL10	protein_coding	304.152	-1.11001	0.00150444
ENSG00000187736	NHEJ1	protein_coding	9.61545	-1.11924	0.00146304
ENSG00000145685	LHFPL2	protein_coding	1070.5	-1.11984	0.00146168
ENSG00000281618	IFITM10	protein_coding	15.4464	-1.12062	0.00110838
ENSG00000211593	IGKJ5	IG_J_gene	22.8299	-1.12214	0.00070731
ENSG00000197182	MIRLET7BHG	lncRNA	46.9915	-1.12587	0.00100762
ENSG00000180921	FAM83H	protein_coding	45.1838	-1.13115	0.0014974
ENSG00000172123	SLFN12	protein_coding	280.292	-1.14304	0.000291461
ENSG00000180263	FGD6	protein_coding	540.66	-1.14353	0.00109841
ENSG00000171724	VAT1L	protein_coding	134.678	-1.18095	0.000362015
ENSG00000242265	PEG10	protein_coding	112.268	-1.19758	0.00131055
ENSG00000178882	RFLNA	protein_coding	854.42	-1.19889	0.000453548
ENSG00000181016	LSMEM1	protein_coding	166.855	-1.20372	0.00130901
ENSG00000165959	CLMN	protein_coding	218.543	-1.21813	0.00126648
ENSG00000079819	EPB41L2	protein_coding	425.044	-1.22309	0.000570242
ENSG00000186642	PDE2A	protein_coding	97.4496	-1.22345	0.00123702
ENSG00000058091	CDK14	protein_coding	543.035	-1.23906	0.000890273
ENSG00000276725	CEP170	protein_coding	324.415	-1.2467	0.000538305
ENSG00000173269	MMRN2	protein_coding	59.1956	-1.26949	0.00086426
ENSG00000081181	ARG2	protein_coding	199.18	-1.27425	0.000963232
ENSG00000198743	SLC5A3	protein_coding	5045.72	-1.27608	0.000865558
ENSG00000133048	CHI3L1	protein_coding	999.911	-1.28111	0.000468087
ENSG00000170017	ALCAM	protein_coding	679.853	-1.28463	0.000741432
ENSG00000104635	SLC39A14	protein_coding	3622.96	-1.31047	0.000896398
ENSG00000152413	HOMER1	protein_coding	90.9523	-1.33445	0.00086128
ENSG00000127329	PTPRB	protein_coding	71.7548	-1.34232	0.000433682
ENSG00000277462	ZNF670	protein_coding	46.3379	-1.34655	0.000537783
ENSG00000138756	BMP2K	protein_coding	311.545	-1.36442	0.000358658
ENSG00000173230	GOLGB1	protein_coding	3270.95	-1.37742	0.000138331
ENSG00000119900	OGFRL1	protein_coding	671.435	-1.40103	0.00070853
ENSG00000170456	DENND5B	protein_coding	200.321	-1.40519	0.000782519
ENSG00000115355	CCDC88A	protein_coding	327.846	-1.42959	8.18143e-05
ENSG00000129667	RHBDF2	protein_coding	1101.44	-1.43898	0.000386078
ENSG00000106688	SLC1A1	protein_coding	51.4181	-1.45505	0.000566029
ENSG00000281165	SLC2A6	protein_coding	100.588	-1.46049	0.000619558
ENSG00000174028	FAM3C2P	processed_pseudogene	21.0964	-1.48426	0.000551143
ENSG00000144674	GOLGA4	protein_coding	1988.2	-1.51577	3.21276e-05
ENSG00000103647	CORO2B	protein_coding	204.301	-1.54447	0.000295294
ENSG00000274750	H3C6	protein_coding	71.2013	-1.55059	0.000519447
ENSG00000042980	ADAM28	protein_coding	492.988	-1.55208	0.000453963
ENSG00000118849	RARRES1	protein_coding	1619.55	-1.55503	0.000165686
ENSG00000145555	MYO10	protein_coding	1300.76	-1.56051	0.000277192
ENSG00000035720	STAP1	protein_coding	107.775	-1.58479	0.00048725
ENSG00000169213	RAB3B	protein_coding	29.1078	-1.63433	0.000426623
ENSG00000161638	ITGA5	protein_coding	2313.86	-1.64318	6.9676e-05
ENSG00000206077	ZDHHC11B	protein_coding	102.036	-1.6461	0.000399084
ENSG00000186594	MIR22HG	lncRNA	44.3821	-1.65504	0.000206276
ENSG00000188211	NCR3LG1	protein_coding	235.717	-1.68482	0.000375583
ENSG00000219891	ZSCAN12P1	transcribed_unprocessed_pseudogene	18.6808	-1.70239	0.000354729
ENSG00000152380	FAM151B	protein_coding	17.2271	-1.70391	0.000358225
ENSG00000111886	GABRR2	protein_coding	215.853	-1.70508	0.000336294
ENSG00000272933	TRIM8-DT	lncRNA	157.749	-1.78109	8.29021e-05
ENSG00000245648	KLRK1-AS1	lncRNA	31.4944	-1.80144	0.000128791
ENSG00000198722	UNC13B	protein_coding	99.8569	-1.80886	3.70169e-05
ENSG00000149573	MPZL2	protein_coding	52.7552	-1.85427	0.000189344
ENSG00000211625	IGKV3D-20	IG_V_gene	18.6024	-1.86195	0.000171119
ENSG00000196628	TCF4	protein_coding	840.894	-1.90387	0.000204265
ENSG00000135480	KRT7	protein_coding	702.549	-1.91397	0.000131587
ENSG00000134294	SLC38A2	protein_coding	11130.7	-1.94568	1.33654e-05
ENSG00000173517	PEAK1	protein_coding	888.648	-2.05766	3.29189e-06
ENSG00000080200	CRYBG3	protein_coding	213.845	-2.07035	4.28399e-06
ENSG00000136383	ALPK3	protein_coding	111.904	-2.08113	0.000109455
ENSG00000038382	TRIO	protein_coding	1723	-2.08763	2.03986e-05
ENSG00000167034	NKX3-1	protein_coding	588.753	-2.4243	4.36493e-05
ENSG00000244682	FCGR2C	protein_coding	137.338	-2.45018	4.02814e-05
ENSG00000105967	TFEC	protein_coding	292.825	-2.49994	9.36644e-06
ENSG00000050628	PTGER3	protein_coding	61.9258	-2.53696	2.88416e-05
ENSG00000007516	BAIAP3	protein_coding	82.0755	-2.55395	9.62734e-06
ENSG00000116254	CHD5	protein_coding	67.7639	-2.61619	2.13228e-05
ENSG00000211648	IGLV1-47	IG_V_gene	67.8364	-2.74111	1.64814e-05
ENSG00000145244	CORIN	protein_coding	15.5953	-2.75921	7.39805e-06
ENSG00000282447	IGKV3-15	IG_V_gene	57.4567	-2.7624	1.52497e-05
ENSG00000211892	IGHG4	IG_C_gene	318.79	-3.06407	5.68129e-06
ENSG00000211973	IGHV1-69	IG_V_gene	22.9791	-3.12516	5.21204e-06
ENSG00000109458	GAB1	protein_coding	171.64	-3.34227	2.14062e-07
ENSG00000280411	IGHV1-69D	IG_V_gene	50.5629	-4.65176	1.65494e-07

## Sheet: Table S5
Supplementary Table S5. Differentially expressed genes between GroupI and GroupII PM tumors.
Ensembl_Gene_ID	gene_name	gene_biotype	baseMean	log2FoldChange	pvalue
ENSG00000104413	ESRP1	protein_coding	139.941	7.76149	7.69259e-09
ENSG00000160221	GATD3	protein_coding	42.6157	3.23911	2.94316e-05
ENSG00000197415	VEPH1	protein_coding	61.1439	2.59244	1.78345e-05
ENSG00000178568	ERBB4	protein_coding	209.903	1.70061	0.000125588
ENSG00000143217	NECTIN4	protein_coding	50.5722	1.44761	0.000156416
ENSG00000144891	AGTR1	protein_coding	947.221	1.08644	0.000252076
ENSG00000129654	FOXJ1	protein_coding	9.81635	0.727846	0.000413012
ENSG00000226453	LINC02542	lncRNA	14.2539	0.654215	0.000480028
ENSG00000196468	FGF16	protein_coding	24.6203	0.628994	0.000580165
ENSG00000166828	SCNN1G	protein_coding	69.4362	0.62593	0.0006438
ENSG00000121769	FABP3	protein_coding	534.493	0.529081	0.00052662
ENSG00000160224	AIRE	protein_coding	5.35965	-0.525757	0.000706878
ENSG00000172901	LVRN	protein_coding	476.083	-0.549999	0.000710272
ENSG00000281990	IGHV1-69-2	IG_V_gene	756.417	-0.633307	0.000419739
ENSG00000104921	FCER2	protein_coding	79.0592	-0.669607	0.0002005
ENSG00000276566	IGKV1D-13	IG_V_gene	1518.15	-0.699303	0.000530776
ENSG00000211891	IGHE	IG_C_gene	18.6222	-0.713585	0.000458116
ENSG00000152578	GRIA4	protein_coding	80.0643	-0.723624	0.000519745
ENSG00000282120	IGKV1-39	IG_V_gene	678.288	-0.780632	0.000210015
ENSG00000282801	IGKV1-5	IG_V_gene	19591.3	-0.784826	0.000334045
ENSG00000211647	IGLV5-48	IG_V_gene	12.5505	-0.788064	0.0003985
ENSG00000120057	SFRP5	protein_coding	167.64	-0.789946	0.000444477
ENSG00000211638	IGLV8-61	IG_V_gene	834.017	-0.799307	0.000261744
ENST00000827722	FAM177B	protein_coding	26.928	-0.886138	7.00722e-05
ENSG00000186567	CEACAM19	protein_coding	93.569	-0.992756	3.05101e-05
ENSG00000180139	ACTA2-AS1	lncRNA	41.7678	-1.02573	0.000106363
ENSG00000211951	IGHV2-26	IG_V_gene	955.493	-1.20001	0.000178717
ENSG00000240707	LINC01168	lncRNA	51.5066	-1.27424	0.000229466
ENSG00000211890	IGHA2	IG_C_gene	701.82	-1.48336	8.26338e-05
ENSG00000243264	IGKV2D-29	IG_V_gene	674.85	-1.6553	7.13529e-05
ENSG00000211644	IGLV1-51	IG_V_gene	74.4799	-1.69402	0.000109189
ENSG00000211962	IGHV1-46	IG_V_gene	3769.84	-1.78083	0.000105957
ENSG00000225217	HSPA7	unprocessed_pseudogene	618.838	-1.89145	8.61689e-09
ENSG00000015413	DPEP1	protein_coding	40.9616	-1.99166	1.17374e-06
ENSG00000111536	IL26	protein_coding	3.86842	-2.05943	0.00010044
ENSG00000144908	ALDH1L1	protein_coding	102.965	-2.1556	6.51347e-06
ENSG00000203857	HSD3B1	protein_coding	548.773	-2.42897	6.19414e-05
ENSG00000251546	IGKV1D-39	IG_V_gene	1105.35	-2.68763	6.91925e-06
ENSG00000100721	TCL1A	protein_coding	59.4637	-2.79014	9.88016e-07
ENSG00000211664	IGLV2-18	IG_V_gene	503.504	-3.63338	1.97741e-05
ENSG00000211652	IGLV7-43	IG_V_gene	414.42	-3.93276	3.79594e-06
ENSG00000211648	IGLV1-47	IG_V_gene	3858.72	-3.96797	2.98822e-08
ENSG00000211637	IGLV4-69	IG_V_gene	1486.6	-4.03555	1.06772e-07
ENSG00000282671	IGKV2-24	IG_V_gene	1353.52	-4.17143	6.82169e-10
ENSG00000241244	IGKV1D-16	IG_V_gene	190.684	-4.19629	2.0478e-08
ENSG00000211611	IGKV6-21	IG_V_gene	1276.14	-4.66072	5.27499e-06
ENSG00000283113	IGKV1-8	IG_V_gene	410.155	-4.84407	3.41623e-07
ENSG00000211892	IGHG4	IG_C_gene	36111.5	-5.05724	1.00114e-09
ENSG00000211973	IGHV1-69	IG_V_gene	1712.04	-6.82274	1.04565e-12
ENSG00000211974	IGHV2-70D	IG_V_gene	1280.46	-9.15498	4.69001e-15

## Sheet: Table S6
Supplementary Table S6. Patients information
For PM-Treg cell and PM-Tumor samples profiled by RNA-sequencing, patients records are shown including gender, age at diagnosis and histotype.
For NSCLC and PM infiltrating CD45+ T cells analyzed by flow cytometry, the same information are available
PM PATIENTS (RNA SEQUENCING)	GENDER	AGE(y)	HISTOTYPE	SECONDARY MALIGNANCIES
PLEURAL MESOTHELIOMA 1 (PM1)	M	47	Epithelioid	None
PLEURAL MESOTHELIOMA 3 (PM3)	F	74	Epithelioid	None
PLEURAL MESOTHELIOMA 5 (PM5)	M	73	Epithelioid	None
PLEURAL MESOTHELIOMA 8 (PM8)	M	63	Epithelioid	None
PLEURAL MESOTHELIOMA 10 (PM10)	M	64	Epithelioid	None
PLEURAL MESOTHELIOMA 14 (PM14)	F	67	Epithelioid	None
PLEURAL MESOTHELIOMA 22 (PM22)	M	70	Epithelioid	None
PLEURAL MESOTHELIOMA 31 (PM31)	M	64	Epithelioid	None
PLEURAL MESOTHELIOMA 33 (PM33)	M	74	Epithelioid	None
PATIENTS (FLOW CYTOMETRY)	GENDER	AGE(y)	HISTOTYPE	SECONDARY MALIGNANCIES
LUNG CANCER 19 (LC19)	M	67	NSCLC	None
LUNG CANCER 20 (LC20)	M	69	NSCLC	None
LUNG CANCER 30 (LC30)	M	64	NSCLC	None
LUNG CANCER 84 (LC84)	M	64	NSCLC	None
PLEURAL MESOTHELIOMA 83 (PM83)	M	73	Epithelioid	None
PLEURAL MESOTHELIOMA 88 (PM88)	M	78	Epithelioid	None
PLEURAL MESOTHELIOMA 89 (PM89)	M	72	Epithelioid	None
PLEURAL MESOTHELIOMA 90 (PM90)	M	73	Epithelioid	None
NSCLC= Non Small Cell Lung Cancer
PM= Pleural Mesothelioma

## Sheet: Table S7
Supplementary Table S7. MACSima Imaging Cycling Staining Technology, used antibodies and cycles.
Cycle	Markers in FITC/AF488	Markers in PE/TxRed	Markers in APC/AF647	Cycle duration (min)
1	CD8*FITC (REA1024; Miltenyi 130-117-200; dil 1:50)	CD4*PE (REA1307; Miltenyi 130-127-906; dil 1:50)	CD3*APC (REA1151; Miltenyi 130-120-269; dil 1:50)	20
2		Foxp3*PE (REA1253; Miltenyi 130-127-808; dil 1:25)		20
3	VEGF*FITC (REAL1004; Miltenyi 130-127-122; dil1:50)		S6pS235/Ps236*APC (REA454; Miltenyi 130-124-255; dil 1:25) (*)	20
4	KI67*FITC (REA183; Miltenyi 130-117-691; dil1:50)	CD20*PE (REA1087; Miltenyi 130-118-293; dil 1:50	COL1A1*APC (REAL958; Miltenyi 130-127-017; dil 1:50)	20
5	CD209*FITC (REAL1087; Miltenyi 130-127-665; 1:25)	CD11C*PE (REAL235; Miltenyi 130-121-314; dil 1:25)		20
6	HLA-DR*FITC (REAL550; Miltenyi 130-123-076; dil1:50)	CD68*PE (REA1306; Miltenyi 130-128-345; dil 1:50)		20
7	WT1*FITC (REA925; Miltenyi 130-115-469; dil 1:50)	COX4*PE (REAL694; Miltenyi 130-126-578; dil 1:25) (**)	TOMM22*APC (REA1185; Miltenyi 130-122-079; dil 1:50) (**)	20
8	CYTOKERATIN 5/6*FITC (REA913; Miltenyi 130-115-256; dil1:50)	COL1A3*PE (REAL912; Miltenyi 130-127-357; dil 1:50)		20
9	VIMENTIN*FIT (REA409; Miltenyi 130-116-508; dil 1:50)	ACTA2*PE (REAL650; Miltenyi 130-123-370; dil 1:50)		20
10	Mouse antibody B7-1/CD80 complexed with VHH nanobody CoraLite Plus 488 (Nanobody/Ab complex 1:3, mix dilution1:25) (Ab: R&D, code 37711; Nb: ChromoTek code CTK0103)	WGA TX-Red (molecular Probes, thermoFisher; dilution 1:100)	Rabbit antibody p-S6 complexed with VHH nanobody CoraLite Plus 647 (Nanobody/Ab complex 1:3, mix dilution1:25) (Ab: CellSignaling code 2211S; Nb: ChromoTek code CTL0119) (*)	20
(*) Two different antibodies targeting the phosphorylated ribosomal protein S6 were used, in order to be sure to detect specific signal in all actively translating cells within the complex FFPE tissue.
(**) Two distinct mitochondrial proteins were targeted with the anti-Cox4 and anti-Tomm22 antibodies, as to ensure correct labelling of mitochondrial density within the complex FFPE tissue.

## Sheet: Table S8
Supplementary Table S8. MACSima Imaging Cycling Staining Technology: cell types assignation, MFI threshold and exclusion rules.
Category	Rule	M1_MFI cutoff	M3_MFI cutoff	M4_MFI cutoff
CD4⁺ T cell	CD4+ AND not CD8+	CD4: 1500; CD8: 1500	CD4: 2000; CD8: 1500	CD4:2000; CD8:1500
CD8⁺ T cell	CD8+ AND not CD4+	CD4: 1500; CD8: 1500	CD4: 2000; CD8: 1500	CD4:2000; CD8:1500
B cells	CD20+	1500	1500	1500
Dendritic Cells (DC)	CD209+	1500	2000	2000
Macrophage	CD68+	1500	2000	2000
Tumor cell	WT1+ OR Vimentin	WT1: 250; Vimentin: 500	WT1: 250; Vimentin: 500	WT1: 250; Vimentin: 500
Treg cell	Foxp3+ AND CD4+	Foxp3: 1500; CD4: 1500	Foxp3: 1500; CD4: 2000	Foxp3: 1500; CD4: 2000
High translating cell	p-S6	>=1500	>=2000	>=2000
Low translating cell	p-S6	<1500	<2000	<2000
High respiration	TOMM22+ tumor cells	>= 1500	>=2000	>=2000
Low respiration	TOMM22- tumor cells	<1500	<2000	<2000
